# Supplementary material
Source: publisher figshare collection journal article supplement (https://acs.figshare.com/ndownloader/files/5435324)
Supplement: Supplementary file 1 [file 5435324]

data_a415
# start Validation Reply Form
_vrf_CRYSS02_a415
;
PROBLEM: The value of _exptl_crystal_size_max is > 1.0
RESPONSE: The crystal was a thin needle. A longer crystal gave us stronger diffraction. 
The quality of diffraction, the data reduction and the X-ray structure is fine.  
This alert can be safely ignored.  
;
# end Validation Reply Form
_audit_creation_date              2016-01-14
_audit_creation_method
;
Olex2 1.2-beta
(compiled 2015.11.10 svn.r3248 for OlexSys, GUI svn.r5133)
;
_publ_contact_author_address      ?
_publ_contact_author_email        ?
_publ_contact_author_name         ''
_publ_contact_author_phone        ?
_publ_section_references
;
Dolomanov, O.V., Bourhis, L.J., Gildea, R.J, Howard, J.A.K. & Puschmann, H.
 (2009), J. Appl. Cryst. 42, 339-341.

Sheldrick, G.M. (2008). Acta Cryst. A64, 112-122 Palatinus, L. & Chapuis, G. (2007). J. Appl. Cryst., 40, 786-790; Palatinus, L. & van der Lee, A. (2008). J. Appl. Cryst. 41, 975-984; Palatinus, L., Prathapa, S. J. & van Smaalen, S. (2012). J. Appl. Cryst. 45, 575-580 Petricek,V., Dusek,M. & Palatinus,L.(2006). <i>Jana2006. The crystallographic computing system.</i> Institute of Physics, Praha, Czech Republic. Spek, A. L. (2003). <i>J. Appl. Cryst.</i> <b>36</b>, 7-13. Bruker (2014). <i>APEX2</i> Version 2014.1-1. Bruker AXS Inc., Madison, Wisconsin, USA. Bruker (2013). <i>SAINT-Plus</i> V8.34A Bruker AXS Inc., Madison, Wisconsin, USA. Sheldrick, G. M. (2008). <i>SADABS</i> Version 2008-1. Bruker AXS Inc., Madison, Wisconsin, USA.

Sheldrick, G.M. (2008). Acta Cryst. A64, 112-122.

Sheldrick, G.M. (2015). Acta Cryst. A71, 3-8.
;
_chemical_name_common             ?
_chemical_name_systematic         ?
_chemical_formula_moiety          'C15 H23 N O2 S'
_chemical_formula_sum             'C15 H23 N O2 S'
_chemical_formula_weight          281.40
_chemical_absolute_configuration  ad
_chemical_melting_point           ?
loop_
  _atom_type_symbol
  _atom_type_description
  _atom_type_scat_dispersion_real
  _atom_type_scat_dispersion_imag
  _atom_type_scat_source
 'C' 'C' 0.0033 0.0016 'International Tables Vol C Tables 4.2.6.8 and 6.1.1.4'
 'H' 'H' 0.0000 0.0000 'International Tables Vol C Tables 4.2.6.8 and 6.1.1.4'
 'N' 'N' 0.0061 0.0033 'International Tables Vol C Tables 4.2.6.8 and 6.1.1.4'
 'O' 'O' 0.0106 0.0060 'International Tables Vol C Tables 4.2.6.8 and 6.1.1.4'
 'S' 'S' 0.1246 0.1234 'International Tables Vol C Tables 4.2.6.8 and 6.1.1.4'

_shelx_space_group_comment
;
The symmetry employed for this shelxl refinement is uniquely defined
by the following loop, which should always be used as a source of
symmetry information in preference to the above space-group names.
They are only intended as comments.
;
_space_group_crystal_system       'orthorhombic'
_space_group_IT_number            19
_space_group_name_H-M_alt         'P 21 21 21'
_space_group_name_Hall            'P 2ac 2ab'
loop_
  _space_group_symop_operation_xyz
 'x, y, z'
 '-x+1/2, -y, z+1/2'
 '-x, y+1/2, -z+1/2'
 'x+1/2, -y+1/2, -z'

_cell_length_a                    6.5067(4)
_cell_length_b                    10.2546(7)
_cell_length_c                    22.3875(14)
_cell_angle_alpha                 90
_cell_angle_beta                  90
_cell_angle_gamma                 90
_cell_volume                      1493.77(17)
_cell_formula_units_Z             4
_cell_measurement_reflns_used     8512
_cell_measurement_temperature     110(2)
_cell_measurement_theta_max       30.907
_cell_measurement_theta_min       2.18
_shelx_estimated_absorpt_T_max    0.978
_shelx_estimated_absorpt_T_min    0.775
_exptl_absorpt_coefficient_mu     0.215
_exptl_absorpt_correction_T_max   0.7462
_exptl_absorpt_correction_T_min   0.5490
_exptl_absorpt_correction_type    multi-scan
_exptl_absorpt_process_details
;
SADABS-2014/5 (Bruker,2014/5) was used for absorption correction.
wR2(int) was 0.1779 before and 0.0715 after correction.
The Ratio of minimum to maximum transmission is 0.7357.
The \l/2 correction factor is 0.00150.
;
_exptl_absorpt_special_details    ?
_exptl_crystal_colour             colourless
_exptl_crystal_colour_primary     colourless
_exptl_crystal_density_diffrn     1.251
_exptl_crystal_density_meas       ?
_exptl_crystal_density_method     ?
_exptl_crystal_description        needle
_exptl_crystal_F_000              608
_exptl_crystal_preparation        ?
_exptl_crystal_recrystallization_method 'Slow evaporation from hexanes'
_exptl_crystal_size_max           1.251
_exptl_crystal_size_mid           0.134
_exptl_crystal_size_min           0.102
_exptl_transmission_factor_max    ?
_exptl_transmission_factor_min    ?
_diffrn_reflns_av_R_equivalents   0.0450
_diffrn_reflns_av_unetI/netI      0.0519
_diffrn_reflns_Laue_measured_fraction_full 0.999
_diffrn_reflns_Laue_measured_fraction_max 0.997
_diffrn_reflns_limit_h_max        9
_diffrn_reflns_limit_h_min        -8
_diffrn_reflns_limit_k_max        11
_diffrn_reflns_limit_k_min        -14
_diffrn_reflns_limit_l_max        32
_diffrn_reflns_limit_l_min        -32
_diffrn_reflns_number             13470
_diffrn_reflns_point_group_measured_fraction_full 0.999
_diffrn_reflns_point_group_measured_fraction_max 0.993
_diffrn_reflns_theta_full         26.000
_diffrn_reflns_theta_max          31.058
_diffrn_reflns_theta_min          2.694
_diffrn_ambient_temperature       110(2)
_diffrn_detector_area_resol_mean  512
_diffrn_measured_fraction_theta_full 0.999
_diffrn_measured_fraction_theta_max 0.997
_diffrn_measurement_device_type   'Bruker APEX-II CCD'
_diffrn_measurement_method        '\f and \w scans'
_diffrn_radiation_monochromator   graphite
_diffrn_radiation_type            MoK\a
_diffrn_radiation_wavelength      0.71073
_diffrn_source                    'fine-focus sealed tube'
_diffrn_standards_number          0
_reflns_Friedel_coverage          0.737
_reflns_Friedel_fraction_full     1.000
_reflns_Friedel_fraction_max      0.987
_reflns_number_gt                 4250
_reflns_number_total              4751
_reflns_special_details
;
 Reflections were merged by SHELXL according to the crystal
 class for the calculation of statistics and refinement.
 
 _reflns_Friedel_fraction is defined as the number of unique
 Friedel pairs measured divided by the number that would be
 possible theoretically, ignoring centric projections and
 systematic absences.
;
_reflns_threshold_expression      'I > 2\s(I)'
_computing_cell_refinement        'SAINT v8.34A (Bruker, 2013)'
_computing_data_collection        'APEX2 v2014.1-1 (Bruker, 2014)'
_computing_data_reduction         'SAINT v8.34A (Bruker, 2013)'
_computing_molecular_graphics     'Olex2 (Dolomanov et al., 2009)'
_computing_publication_material   'Olex2 (Dolomanov et al., 2009)'
_computing_structure_refinement   'SHELXL-97 (Sheldrick, 2008)'
_computing_structure_solution     'SHELXS-97 (Sheldrick, 2008)'
_refine_diff_density_max          0.686
_refine_diff_density_min          -0.296
_refine_diff_density_rms          0.076
_refine_ls_abs_structure_details
;
 Flack x determined using 1617 quotients [(I+)-(I-)]/[(I+)+(I-)]
 (Parsons, Flack and Wagner, Acta Cryst. B69 (2013) 249-259).
;
_refine_ls_abs_structure_Flack    0.08(4)
_refine_ls_extinction_coef        .
_refine_ls_extinction_method      none
_refine_ls_goodness_of_fit_ref    1.027
_refine_ls_hydrogen_treatment     mixed
_refine_ls_matrix_type            full
_refine_ls_number_parameters      180
_refine_ls_number_reflns          4751
_refine_ls_number_restraints      1
_refine_ls_R_factor_all           0.0547
_refine_ls_R_factor_gt            0.0469
_refine_ls_restrained_S_all       1.028
_refine_ls_shift/su_max           0.001
_refine_ls_shift/su_mean          0.000
_refine_ls_structure_factor_coef  Fsqd
_refine_ls_weighting_details
'w=1/[\s^2^(Fo^2^)+(0.0681P)^2^+0.3052P] where P=(Fo^2^+2Fc^2^)/3'
_refine_ls_weighting_scheme       calc
_refine_ls_wR_factor_gt           0.1122
_refine_ls_wR_factor_ref          0.1193
_refine_special_details           ?
_olex2_refinement_description
;
1. Fixed Uiso
 At 1.2 times of:
  All C(H) groups, All C(H,H) groups
 At 1.5 times of:
  All C(H,H,H) groups
2. Restrained distances
 N1-H1
 0.955 with sigma of 0.02
3.a Ternary CH refined with riding coordinates:
 C1(H009)
3.b Secondary CH2 refined with riding coordinates:
 C2(H00C,H00D)
3.c Aromatic/amide H refined with riding coordinates:
 C7(H006), C12(H007), C8(H00E), C13(H00F), C11(H00G), C15(H00H), C14(H00L)
3.d Idealised Me refined as rotating group:
 C6(H00I,H00J,H00K), C9(H00M,H00N,H00O), C3(H00P,H00Q,H00R), C5(H00S,H00T,H00U)
;
_atom_sites_solution_hydrogens    mixed
_atom_sites_solution_primary      ?
_atom_sites_solution_secondary    ?
loop_
  _atom_site_label
  _atom_site_type_symbol
  _atom_site_fract_x
  _atom_site_fract_y
  _atom_site_fract_z
  _atom_site_U_iso_or_equiv
  _atom_site_adp_type
  _atom_site_occupancy
  _atom_site_site_symmetry_order
  _atom_site_calc_flag
  _atom_site_refinement_flags_posn
  _atom_site_refinement_flags_adp
  _atom_site_refinement_flags_occupancy
  _atom_site_disorder_assembly
  _atom_site_disorder_group
 S1 S 0.77405(8) 0.66902(6) 0.44632(2) 0.01290(13) Uani 1 1 d . . . . .
 O2 O 0.7583(3) 0.69471(18) 0.50933(7) 0.0191(4) Uani 1 1 d . . . . .
 O1 O 0.9266(3) 0.5787(2) 0.42594(9) 0.0226(4) Uani 1 1 d . . . . .
 N1 N 0.5510(3) 0.6157(2) 0.42503(9) 0.0154(4) Uani 1 1 d D . . . .
 C4 C 0.3030(3) 0.4453(2) 0.28897(10) 0.0138(4) Uani 1 1 d . . . . .
 C7 C 0.4912(4) 0.4167(3) 0.25130(11) 0.0139(4) Uani 1 1 d . . . . .
 H006 H 0.5787 0.3491 0.2653 0.017 Uiso 1 1 calc R . . . .
 C12 C 0.6775(4) 0.1838(3) 0.41787(11) 0.0224(5) Uani 1 1 d . . . . .
 H007 H 0.8131 0.1497 0.4157 0.027 Uiso 1 1 calc R . . . .
 C2 C 0.5231(3) 0.5797(2) 0.36160(10) 0.0139(4) Uani 1 1 d . . . . .
 H00C H 0.6556 0.5498 0.3448 0.017 Uiso 1 1 calc R . . . .
 H00D H 0.4774 0.6569 0.3386 0.017 Uiso 1 1 calc R . . . .
 C1 C 0.3628(3) 0.4707(2) 0.35603(10) 0.0139(4) Uani 1 1 d . . . . .
 H009 H 0.2357 0.5032 0.3763 0.017 Uiso 1 1 calc R . . . .
 C8 C 0.5484(4) 0.4748(3) 0.20113(10) 0.0164(4) Uani 1 1 d . . . . .
 H00E H 0.4693 0.5470 0.1878 0.020 Uiso 1 1 calc R . . . .
 C13 C 0.5298(5) 0.1203(3) 0.45179(11) 0.0250(6) Uani 1 1 d . . . . .
 H00F H 0.5644 0.0432 0.4731 0.030 Uiso 1 1 calc R . . . .
 C10 C 0.4282(4) 0.3484(2) 0.38936(10) 0.0146(4) Uani 1 1 d . . . . .
 C11 C 0.6273(4) 0.2974(2) 0.38706(10) 0.0170(5) Uani 1 1 d . . . . .
 H00G H 0.7296 0.3407 0.3642 0.020 Uiso 1 1 calc R . . . .
 C15 C 0.2816(4) 0.2824(3) 0.42387(10) 0.0198(5) Uani 1 1 d . . . . .
 H00H H 0.1456 0.3157 0.4262 0.024 Uiso 1 1 calc R . . . .
 C6 C 0.1803(4) 0.5624(3) 0.26566(12) 0.0204(5) Uani 1 1 d . . . . .
 H00I H 0.2689 0.6397 0.2649 0.031 Uiso 1 1 calc GR . . . .
 H00J H 0.0627 0.5785 0.2920 0.031 Uiso 1 1 calc GR . . . .
 H00K H 0.1309 0.5438 0.2252 0.031 Uiso 1 1 calc GR . . . .
 C14 C 0.3315(4) 0.1695(3) 0.45457(11) 0.0246(5) Uani 1 1 d . . . . .
 H00L H 0.2299 0.1258 0.4775 0.029 Uiso 1 1 calc R . . . .
 C9 C 0.7284(4) 0.4346(3) 0.16411(10) 0.0193(5) Uani 1 1 d . . . . .
 H00M H 0.6812 0.4093 0.1242 0.029 Uiso 1 1 calc GR . . . .
 H00N H 0.7974 0.3604 0.1831 0.029 Uiso 1 1 calc GR . . . .
 H00O H 0.8247 0.5077 0.1608 0.029 Uiso 1 1 calc GR . . . .
 C3 C 0.8175(4) 0.8188(3) 0.41009(11) 0.0222(5) Uani 1 1 d . . . . .
 H00P H 0.7090 0.8806 0.4211 0.033 Uiso 1 1 calc GR . . . .
 H00Q H 0.8164 0.8055 0.3667 0.033 Uiso 1 1 calc GR . . . .
 H00R H 0.9513 0.8537 0.4223 0.033 Uiso 1 1 calc GR . . . .
 C5 C 0.1631(4) 0.3244(3) 0.28508(11) 0.0204(5) Uani 1 1 d . . . . .
 H00S H 0.1133 0.3143 0.2440 0.031 Uiso 1 1 calc GR . . . .
 H00T H 0.0459 0.3353 0.3121 0.031 Uiso 1 1 calc GR . . . .
 H00U H 0.2412 0.2467 0.2966 0.031 Uiso 1 1 calc GR . . . .
 H1 H 0.445(4) 0.657(3) 0.4422(13) 0.022(8) Uiso 1 1 d D . . . .

loop_
  _atom_site_aniso_label
  _atom_site_aniso_U_11
  _atom_site_aniso_U_22
  _atom_site_aniso_U_33
  _atom_site_aniso_U_23
  _atom_site_aniso_U_13
  _atom_site_aniso_U_12
 S1 0.0116(2) 0.0134(3) 0.0137(2) -0.0008(2) 0.00016(17) 0.0017(2)
 O2 0.0175(8) 0.0252(10) 0.0145(7) -0.0021(6) -0.0003(6) -0.0031(7)
 O1 0.0172(9) 0.0238(10) 0.0268(9) -0.0061(8) -0.0002(7) 0.0090(8)
 N1 0.0122(9) 0.0167(10) 0.0171(9) -0.0046(8) -0.0002(7) -0.0003(8)
 C4 0.0126(10) 0.0127(10) 0.0161(9) -0.0018(8) -0.0012(8) 0.0009(8)
 C7 0.0137(9) 0.0125(10) 0.0154(9) -0.0016(8) -0.0012(7) 0.0026(8)
 C12 0.0287(13) 0.0180(12) 0.0204(11) -0.0033(10) -0.0064(9) 0.0026(11)
 C2 0.0150(10) 0.0133(11) 0.0133(9) -0.0016(8) 0.0001(8) -0.0004(8)
 C1 0.0121(9) 0.0152(11) 0.0143(9) -0.0009(8) 0.0017(7) 0.0003(8)
 C8 0.0171(11) 0.0159(11) 0.0163(10) 0.0002(9) -0.0013(8) 0.0004(9)
 C13 0.0456(16) 0.0147(12) 0.0148(11) 0.0005(9) -0.0050(11) -0.0003(11)
 C10 0.0185(10) 0.0131(11) 0.0123(9) -0.0023(8) -0.0006(8) -0.0013(9)
 C11 0.0203(11) 0.0158(11) 0.0148(10) -0.0004(8) -0.0016(8) -0.0008(9)
 C15 0.0234(12) 0.0203(11) 0.0158(9) -0.0034(9) 0.0040(9) -0.0031(10)
 C6 0.0181(11) 0.0196(13) 0.0235(11) 0.0000(10) -0.0029(9) 0.0061(10)
 C14 0.0387(14) 0.0186(12) 0.0164(10) -0.0014(10) 0.0055(9) -0.0072(12)
 C9 0.0196(11) 0.0219(12) 0.0164(9) 0.0011(9) 0.0001(9) 0.0021(10)
 C3 0.0226(12) 0.0190(12) 0.0251(11) 0.0050(10) -0.0035(9) -0.0039(11)
 C5 0.0184(10) 0.0207(12) 0.0221(11) -0.0001(10) -0.0013(8) -0.0053(10)

_geom_special_details
;
 All esds (except the esd in the dihedral angle between two l.s. planes)
 are estimated using the full covariance matrix.  The cell esds are taken
 into account individually in the estimation of esds in distances, angles
 and torsion angles; correlations between esds in cell parameters are only
 used when they are defined by crystal symmetry.  An approximate (isotropic)
 treatment of cell esds is used for estimating esds involving l.s. planes.
;
loop_
  _geom_bond_atom_site_label_1
  _geom_bond_atom_site_label_2
  _geom_bond_distance
  _geom_bond_site_symmetry_2
  _geom_bond_publ_flag
 S1 O2 1.4388(16) . ?
 S1 O1 1.4321(19) . ?
 S1 N1 1.622(2) . ?
 S1 C3 1.760(3) . ?
 N1 C2 1.479(3) . ?
 N1 H1 0.89(2) . ?
 C4 C7 1.516(3) . ?
 C4 C1 1.573(3) . ?
 C4 C6 1.533(3) . ?
 C4 C5 1.540(3) . ?
 C7 H006 0.9500 . ?
 C7 C8 1.324(3) . ?
 C12 H007 0.9500 . ?
 C12 C13 1.387(4) . ?
 C12 C11 1.393(4) . ?
 C2 H00C 0.9900 . ?
 C2 H00D 0.9900 . ?
 C2 C1 1.534(3) . ?
 C1 H009 1.0000 . ?
 C1 C10 1.520(3) . ?
 C8 H00E 0.9500 . ?
 C8 C9 1.493(3) . ?
 C13 H00F 0.9500 . ?
 C13 C14 1.387(4) . ?
 C10 C11 1.398(3) . ?
 C10 C15 1.402(3) . ?
 C11 H00G 0.9500 . ?
 C15 H00H 0.9500 . ?
 C15 C14 1.385(4) . ?
 C6 H00I 0.9800 . ?
 C6 H00J 0.9800 . ?
 C6 H00K 0.9800 . ?
 C14 H00L 0.9500 . ?
 C9 H00M 0.9800 . ?
 C9 H00N 0.9800 . ?
 C9 H00O 0.9800 . ?
 C3 H00P 0.9800 . ?
 C3 H00Q 0.9800 . ?
 C3 H00R 0.9800 . ?
 C5 H00S 0.9800 . ?
 C5 H00T 0.9800 . ?
 C5 H00U 0.9800 . ?

loop_
  _geom_angle_atom_site_label_1
  _geom_angle_atom_site_label_2
  _geom_angle_atom_site_label_3
  _geom_angle
  _geom_angle_site_symmetry_1
  _geom_angle_site_symmetry_3
  _geom_angle_publ_flag
 O2 S1 N1 106.62(11) . . ?
 O2 S1 C3 107.67(12) . . ?
 O1 S1 O2 118.70(11) . . ?
 O1 S1 N1 107.99(11) . . ?
 O1 S1 C3 107.82(13) . . ?
 N1 S1 C3 107.59(12) . . ?
 S1 N1 H1 114(2) . . ?
 C2 N1 S1 118.45(16) . . ?
 C2 N1 H1 116(2) . . ?
 C7 C4 C1 111.29(18) . . ?
 C7 C4 C6 112.5(2) . . ?
 C7 C4 C5 106.9(2) . . ?
 C6 C4 C1 108.89(19) . . ?
 C6 C4 C5 107.7(2) . . ?
 C5 C4 C1 109.49(19) . . ?
 C4 C7 H006 116.1 . . ?
 C8 C7 C4 127.7(2) . . ?
 C8 C7 H006 116.1 . . ?
 C13 C12 H007 120.0 . . ?
 C13 C12 C11 120.1(3) . . ?
 C11 C12 H007 120.0 . . ?
 N1 C2 H00C 109.6 . . ?
 N1 C2 H00D 109.6 . . ?
 N1 C2 C1 110.12(18) . . ?
 H00C C2 H00D 108.2 . . ?
 C1 C2 H00C 109.6 . . ?
 C1 C2 H00D 109.6 . . ?
 C4 C1 H009 106.5 . . ?
 C2 C1 C4 111.52(19) . . ?
 C2 C1 H009 106.5 . . ?
 C10 C1 C4 113.64(19) . . ?
 C10 C1 C2 111.75(18) . . ?
 C10 C1 H009 106.5 . . ?
 C7 C8 H00E 117.7 . . ?
 C7 C8 C9 124.5(2) . . ?
 C9 C8 H00E 117.7 . . ?
 C12 C13 H00F 120.0 . . ?
 C14 C13 C12 119.9(2) . . ?
 C14 C13 H00F 120.0 . . ?
 C11 C10 C1 123.4(2) . . ?
 C11 C10 C15 118.0(2) . . ?
 C15 C10 C1 118.6(2) . . ?
 C12 C11 C10 120.8(2) . . ?
 C12 C11 H00G 119.6 . . ?
 C10 C11 H00G 119.6 . . ?
 C10 C15 H00H 119.4 . . ?
 C14 C15 C10 121.2(3) . . ?
 C14 C15 H00H 119.4 . . ?
 C4 C6 H00I 109.5 . . ?
 C4 C6 H00J 109.5 . . ?
 C4 C6 H00K 109.5 . . ?
 H00I C6 H00J 109.5 . . ?
 H00I C6 H00K 109.5 . . ?
 H00J C6 H00K 109.5 . . ?
 C13 C14 H00L 120.0 . . ?
 C15 C14 C13 120.0(2) . . ?
 C15 C14 H00L 120.0 . . ?
 C8 C9 H00M 109.5 . . ?
 C8 C9 H00N 109.5 . . ?
 C8 C9 H00O 109.5 . . ?
 H00M C9 H00N 109.5 . . ?
 H00M C9 H00O 109.5 . . ?
 H00N C9 H00O 109.5 . . ?
 S1 C3 H00P 109.5 . . ?
 S1 C3 H00Q 109.5 . . ?
 S1 C3 H00R 109.5 . . ?
 H00P C3 H00Q 109.5 . . ?
 H00P C3 H00R 109.5 . . ?
 H00Q C3 H00R 109.5 . . ?
 C4 C5 H00S 109.5 . . ?
 C4 C5 H00T 109.5 . . ?
 C4 C5 H00U 109.5 . . ?
 H00S C5 H00T 109.5 . . ?
 H00S C5 H00U 109.5 . . ?
 H00T C5 H00U 109.5 . . ?

loop_
  _geom_hbond_atom_site_label_D
  _geom_hbond_atom_site_label_H
  _geom_hbond_atom_site_label_A
  _geom_hbond_distance_DH
  _geom_hbond_distance_HA
  _geom_hbond_distance_DA
  _geom_hbond_angle_DHA
  _geom_hbond_site_symmetry_A
 N1 H1 O2 0.89(2) 2.23(2) 3.093(3) 162(3) 4_466

loop_
  _geom_torsion_atom_site_label_1
  _geom_torsion_atom_site_label_2
  _geom_torsion_atom_site_label_3
  _geom_torsion_atom_site_label_4
  _geom_torsion
  _geom_torsion_site_symmetry_1
  _geom_torsion_site_symmetry_2
  _geom_torsion_site_symmetry_3
  _geom_torsion_site_symmetry_4
  _geom_torsion_publ_flag
 S1 N1 C2 C1 149.84(17) . . . . ?
 O2 S1 N1 C2 -179.29(18) . . . . ?
 O1 S1 N1 C2 -50.7(2) . . . . ?
 N1 C2 C1 C4 170.89(19) . . . . ?
 N1 C2 C1 C10 -60.7(2) . . . . ?
 C4 C7 C8 C9 -175.3(2) . . . . ?
 C4 C1 C10 C11 83.3(3) . . . . ?
 C4 C1 C10 C15 -96.1(2) . . . . ?
 C7 C4 C1 C2 55.0(3) . . . . ?
 C7 C4 C1 C10 -72.4(3) . . . . ?
 C12 C13 C14 C15 -0.5(4) . . . . ?
 C2 C1 C10 C11 -43.9(3) . . . . ?
 C2 C1 C10 C15 136.6(2) . . . . ?
 C1 C4 C7 C8 -127.0(3) . . . . ?
 C1 C10 C11 C12 -179.0(2) . . . . ?
 C1 C10 C15 C14 179.1(2) . . . . ?
 C13 C12 C11 C10 -0.5(4) . . . . ?
 C10 C15 C14 C13 0.4(4) . . . . ?
 C11 C12 C13 C14 0.5(4) . . . . ?
 C11 C10 C15 C14 -0.4(3) . . . . ?
 C15 C10 C11 C12 0.4(3) . . . . ?
 C6 C4 C7 C8 -4.5(4) . . . . ?
 C6 C4 C1 C2 -69.6(2) . . . . ?
 C6 C4 C1 C10 163.04(19) . . . . ?
 C3 S1 N1 C2 65.4(2) . . . . ?
 C5 C4 C7 C8 113.5(3) . . . . ?
 C5 C4 C1 C2 172.98(19) . . . . ?
 C5 C4 C1 C10 45.6(3) . . . . ?

_shelx_res_file
;
    a415.res created by SHELXL-2014/7

TITL a415_a.res in P2(1)2(1)2(1)
REM Old TITL A415 in P212121 #19
REM SHELXT solution in P2(1)2(1)2(1)
REM R1 0.090, Rweak 0.018, Alpha 0.004, Orientation as input
REM Flack x = 0.108 ( 0.039 ) from Parsons' quotients
REM Formula found by SHELXT: C14 N2 O2 S
CELL 0.71073 6.5067 10.2546 22.3875 90 90 90
ZERR 4 0.0004 0.0007 0.0014 0 0 0
LATT -1
SYMM 0.5-X,-Y,0.5+Z
SYMM -X,0.5+Y,0.5-Z
SYMM 0.5+X,0.5-Y,-Z
SFAC C H N O S
UNIT 60 92 4 8 4
EQIV $1 -0.5+X,1.5-Y,1-Z
DFIX 0.955 N1 H1

L.S. 4 0 0
PLAN  20
SIZE 0.102 0.134 1.251
TEMP -183
HTAB N1 O2_$1
BOND $H
LIST 6
MORE -1
CONF
fmap 2 53
acta 52
REM <olex2.extras>
REM <HklSrc "%.\\A415.hkl">
REM </olex2.extras>

WGHT    0.068100    0.305200
FVAR       0.73136
S1    5    0.774048    0.669016    0.446321    11.00000    0.01160    0.01340 =
         0.01370   -0.00083    0.00016    0.00171
O2    4    0.758290    0.694709    0.509334    11.00000    0.01750    0.02525 =
         0.01448   -0.00210   -0.00027   -0.00314
O1    4    0.926611    0.578728    0.425937    11.00000    0.01724    0.02376 =
         0.02683   -0.00614   -0.00015    0.00896
N1    3    0.550999    0.615748    0.425031    11.00000    0.01224    0.01667 =
         0.01714   -0.00460   -0.00022   -0.00034
C4    1    0.302965    0.445281    0.288965    11.00000    0.01261    0.01275 =
         0.01606   -0.00177   -0.00121    0.00095
C7    1    0.491243    0.416706    0.251302    11.00000    0.01372    0.01247 =
         0.01541   -0.00155   -0.00122    0.00264
AFIX  43
H006  2    0.578650    0.349135    0.265350    11.00000   -1.20000
AFIX   0
C12   1    0.677534    0.183783    0.417869    11.00000    0.02872    0.01805 =
         0.02036   -0.00334   -0.00645    0.00256
AFIX  43
H007  2    0.813107    0.149738    0.415658    11.00000   -1.20000
AFIX   0
C2    1    0.523077    0.579667    0.361601    11.00000    0.01502    0.01328 =
         0.01331   -0.00161    0.00011   -0.00041
AFIX  23
H00C  2    0.655644    0.549762    0.344768    11.00000   -1.20000
H00D  2    0.477383    0.656875    0.338613    11.00000   -1.20000
AFIX   0
C1    1    0.362759    0.470722    0.356027    11.00000    0.01213    0.01521 =
         0.01432   -0.00087    0.00165    0.00029
AFIX  13
H009  2    0.235664    0.503150    0.376278    11.00000   -1.20000
AFIX   0
C8    1    0.548352    0.474769    0.201129    11.00000    0.01708    0.01585 =
         0.01626    0.00025   -0.00126    0.00040
AFIX  43
H00E  2    0.469270    0.546979    0.187772    11.00000   -1.20000
AFIX   0
C13   1    0.529771    0.120301    0.451789    11.00000    0.04564    0.01468 =
         0.01477    0.00050   -0.00496   -0.00033
AFIX  43
H00F  2    0.564380    0.043230    0.473078    11.00000   -1.20000
AFIX   0
C10   1    0.428194    0.348407    0.389364    11.00000    0.01847    0.01307 =
         0.01229   -0.00230   -0.00063   -0.00127
C11   1    0.627282    0.297375    0.387059    11.00000    0.02029    0.01582 =
         0.01477   -0.00037   -0.00162   -0.00082
AFIX  43
H00G  2    0.729554    0.340722    0.364192    11.00000   -1.20000
AFIX   0
C15   1    0.281620    0.282377    0.423867    11.00000    0.02345    0.02028 =
         0.01577   -0.00335    0.00396   -0.00310
AFIX  43
H00H  2    0.145609    0.315663    0.426228    11.00000   -1.20000
AFIX   0
C6    1    0.180308    0.562367    0.265658    11.00000    0.01810    0.01958 =
         0.02346    0.00000   -0.00293    0.00611
AFIX 137
H00I  2    0.268855    0.639656    0.264882    11.00000   -1.50000
H00J  2    0.062747    0.578465    0.292009    11.00000   -1.50000
H00K  2    0.130926    0.543819    0.225185    11.00000   -1.50000
AFIX   0
C14   1    0.331476    0.169508    0.454573    11.00000    0.03865    0.01862 =
         0.01640   -0.00136    0.00555   -0.00718
AFIX  43
H00L  2    0.229865    0.125790    0.477541    11.00000   -1.20000
AFIX   0
C9    1    0.728396    0.434597    0.164110    11.00000    0.01959    0.02191 =
         0.01635    0.00110    0.00014    0.00205
AFIX 137
H00M  2    0.681188    0.409298    0.124189    11.00000   -1.50000
H00N  2    0.797437    0.360436    0.183074    11.00000   -1.50000
H00O  2    0.824747    0.507687    0.160767    11.00000   -1.50000
AFIX   0
C3    1    0.817515    0.818802    0.410090    11.00000    0.02262    0.01897 =
         0.02513    0.00502   -0.00351   -0.00392
AFIX 137
H00P  2    0.709041    0.880624    0.421062    11.00000   -1.50000
H00Q  2    0.816430    0.805456    0.366746    11.00000   -1.50000
H00R  2    0.951278    0.853734    0.422287    11.00000   -1.50000
AFIX   0
C5    1    0.163112    0.324415    0.285079    11.00000    0.01837    0.02075 =
         0.02210   -0.00013   -0.00128   -0.00528
AFIX 137
H00S  2    0.113293    0.314333    0.244027    11.00000   -1.50000
H00T  2    0.045860    0.335314    0.312096    11.00000   -1.50000
H00U  2    0.241191    0.246687    0.296639    11.00000   -1.50000
AFIX   0
H1    2    0.445399    0.657193    0.442185    11.00000    0.02237
HKLF 4

REM  a415_a.res in P2(1)2(1)2(1)
REM R1 =  0.0469 for    4250 Fo > 4sig(Fo)  and  0.0547 for all    4751 data
REM    180 parameters refined using      1 restraints

END

WGHT      0.0681      0.3046

REM Highest difference peak  0.686,  deepest hole -0.296,  1-sigma level  0.076
Q1    1   0.7489  0.6923  0.4823  11.00000  0.05    0.69
Q2    1   0.7916  0.7561  0.4376  11.00000  0.05    0.49
Q3    1   0.8573  0.6360  0.4234  11.00000  0.05    0.48
Q4    1   0.6635  0.6620  0.4277  11.00000  0.05    0.39
Q5    1   0.3825  0.4433  0.2653  11.00000  0.05    0.39
Q6    1   0.7985  0.5822  0.4396  11.00000  0.05    0.38
Q7    1   0.4396  0.1601  0.4446  11.00000  0.05    0.38
Q8    1   0.6484  0.6374  0.4367  11.00000  0.05    0.38
Q9    1   0.5402  0.5932  0.3982  11.00000  0.05    0.37
Q10   1   0.6211  0.4360  0.1813  11.00000  0.05    0.36
Q11   1   0.3661  0.3409  0.4156  11.00000  0.05    0.35
Q12   1   0.3833  0.4256  0.3775  11.00000  0.05    0.35
Q13   1   0.3531  0.3027  0.4019  11.00000  0.05    0.35
Q14   1   0.3413  0.4561  0.3196  11.00000  0.05    0.34
Q15   1   0.6049  0.1775  0.4382  11.00000  0.05    0.32
Q16   1   0.2405  0.5017  0.2753  11.00000  0.05    0.31
Q17   1   0.2412  0.3857  0.2842  11.00000  0.05    0.29
Q18   1   0.9763  0.5846  0.4033  11.00000  0.05    0.29
Q19   1   0.4443  0.5230  0.3617  11.00000  0.05    0.29
Q20   1   0.5449  0.3512  0.3941  11.00000  0.05    0.28
;
_shelx_res_checksum               35089
_shelx_hkl_file
;
   1   0   0   -2.70    0.80
  -1   0   0   -3.60    1.20
   1   0   0   -4.30    0.70
   2   0   0 3086.59  108.99
  -2   0   0 3022.20  111.79
   2   0   0 3052.69  109.49
   3   0   0   -0.20    1.50
   4   0   0 1425.16   54.39
   4   0   0 1447.66   52.89
   5   0   0    0.30    2.30
   5   0   0   -2.90    1.70
   6   0   0   22.10    4.50
   7   0   0   -4.00    2.40
   8   0   0   16.70    5.20
   9   0   0   -5.70    3.20
   0  -1   0   -0.70    0.40
   1  -1   0    2.50    1.60
  -1   1   0   -0.30    2.30
   1  -1   0    4.60    1.50
   1   1   0    1.40    1.00
  -1  -1   0    1.90    1.00
   2  -1   0  989.30   35.90
  -2  -1   0  957.50   35.40
   2  -1   0  974.90   36.10
   2   1   0  988.40   35.70
  -2   1   0  909.21   38.40
   3   1   0    7.80    1.50
  -3   1   0    6.20    3.10
   3   1   0    9.80    2.10
   3  -1   0    6.10    2.10
   3  -1   0    8.90    1.90
  -3  -1   0    6.40    1.90
   4   1   0  409.56   15.70
   4   1   0  384.86   17.10
   4  -1   0  390.26   16.70
   4  -1   0  378.56   17.50
   5  -1   0 1020.60   39.80
   5  -1   0 1055.19   41.20
   5   1   0  998.20   40.50
   6   1   0   50.69    5.90
   6  -1   0   34.20    5.90
   7   1   0   85.69    7.60
   7  -1   0   76.79    8.30
   8   1   0   82.59    8.80
   8  -1   0   98.69    9.80
   9  -1   0   45.30    8.30
   9   1   0   38.60    7.60
   0  -2   0  215.08    9.30
   0   2   0  214.48    9.00
  -1   2   0    1.10    2.40
   1  -2   0    0.60    1.10
   1   2   0    2.00    0.60
  -1  -2   0    2.80    1.20
   1  -2   0    0.30    1.60
  -2  -2   0 3952.70  141.09
   2   2   0 4009.20  141.29
   2  -2   0 3985.30  142.09
  -2   2   0 3969.00  145.09
   2  -2   0 3941.71  142.49
   3  -2   0  293.37   13.20
   3  -2   0  263.97   12.90
   3   2   0  287.37   12.30
  -3  -2   0  301.77   12.10
  -3   2   0  289.17   16.60
   4  -2   0   49.40    4.40
  -4   2   0   51.29    7.10
  -4  -2   0   53.49    4.10
   4   2   0   52.99    3.60
   4   2   0   50.59    4.30
   5  -2   0   22.20    3.80
   5   2   0   17.40    3.50
   5  -2   0   13.50    3.80
   6  -2   0   39.50    6.20
   6   2   0   43.80    5.30
   7   2   0  420.06   20.80
   7  -2   0  427.66   21.90
   8  -2   0   12.10    5.10
   8   2   0   25.60    5.60
   9   2   0  325.07   18.80
   9  -2   0  330.87   20.20
   0   3   0   -1.20    1.50
   0  -3   0    1.00    1.80
  -1  -3   0 1118.59   41.50
  -1   3   0 1166.38   43.30
   1  -3   0 1088.49   42.30
   1   3   0 1089.59   40.10
   1  -3   0 1153.98   41.20
   2  -3   0  527.25   21.00
   2   3   0  549.74   19.80
   2  -3   0  523.25   21.80
  -2  -3   0  528.55   20.20
  -2   3   0  506.25   23.80
  -3   3   0 1346.07   53.09
  -3  -3   0 1288.47   46.80
   3  -3   0 1236.88   48.30
   3  -3   0 1255.57   48.70
   3   3   0 1271.77   46.90
   4  -3   0  187.88   10.60
   4  -3   0  182.98   10.40
  -4  -3   0  208.08    9.40
  -4   3   0  190.58   14.60
   4   3   0  188.78    9.40
   5  -3   0  116.99    8.30
   5  -3   0  104.69    8.00
   5   3   0  113.49    7.30
   6  -3   0   -3.90    1.60
   6   3   0   -0.20    2.10
   7   3   0  251.47   14.30
   7  -3   0  279.87   16.20
   8  -3   0   71.49    9.30
   8   3   0   92.29    8.30
   9   3   0   64.59    7.90
   9  -3   0   64.29    9.10
   0   4   0 2597.74   93.99
   0  -4   0 2594.44   94.79
  -1   4   0 1022.90   40.50
  -1  -4   0 1059.29   39.30
   1  -4   0 1057.49   38.30
   1  -4   0  986.80   39.90
   2  -4   0  374.66   16.40
  -2  -4   0  413.06   16.40
  -2   4   0  398.26   19.70
   2  -4   0  390.86   17.90
   2   4   0  408.16   15.00
  -3  -4   0  598.64   22.50
   3  -4   0  550.34   24.70
  -3   4   0  545.05   27.70
   3   4   0  581.04   21.90
   4  -4   0  241.58   13.30
  -4   4   0  246.18   17.20
   4   4   0  239.48   10.90
   4  -4   0  242.18   12.80
   5  -4   0   11.40    3.90
   5   4   0    6.40    2.30
   5  -4   0   10.90    3.90
   6   4   0    9.70    2.90
   6  -4   0    9.70    3.80
   6  -4   0   12.60    4.40
   7  -4   0  121.79   10.70
   7   4   0  120.79    8.80
   8  -4   0    7.60    4.70
   9  -4   0  238.18   17.20
   0   5   0    0.50    1.50
   0  -5   0    0.20    1.40
  -1   5   0    5.70    2.50
  -1  -5   0    4.10    2.10
   1   5   0    6.50    1.60
   1  -5   0    5.90    2.70
   1  -5   0    4.30    1.40
  -2   5   0  218.28   13.40
   2   5   0  216.98    8.70
   2  -5   0  219.18   12.30
  -2  -5   0  230.68   10.80
   2  -5   0  227.18   10.60
   3  -5   0  388.26   17.60
   3   5   0  395.46   15.40
  -3  -5   0  396.76   16.70
   3  -5   0  393.06   19.10
  -3   5   0  407.76   21.90
   4  -5   0 1046.60   44.00
   4   5   0 1077.09   40.30
   4  -5   0 1075.39   43.00
  -4   5   0 1145.09   49.40
   5   5   0   64.39    4.70
   5  -5   0   79.39    7.40
   5  -5   0   53.39    6.80
   6   5   0   79.79    6.50
   6  -5   0  109.49    9.50
   7  -5   0  113.79   10.10
   8  -5   0    4.90    4.10
   0  -6   0 1024.20   41.80
   0   6   0 1073.59   40.20
  -1   6   0  655.73   27.80
  -1  -6   0  654.63   27.30
   1  -6   0  643.04   28.20
   2  -6   0 1695.93   66.19
   2  -6   0 1687.93   63.39
  -2  -6   0 1740.63   64.29
  -2   6   0 1728.13   67.39
   3  -6   0   14.20    3.20
  -3  -6   0   19.10    3.10
  -3   6   0   16.40    5.30
   3   6   0   16.30    1.80
   3  -6   0   12.90    3.80
   4  -6   0    0.00    2.30
  -4   6   0   -6.00    3.50
   4  -6   0   -1.90    2.50
   5  -6   0   24.10    5.00
   5  -6   0   24.10    5.60
   6  -6   0   50.99    7.10
   6  -6   0   51.89    8.30
   7  -6   0    7.50    4.50
   8  -6   0    1.10    3.50
   0  -7   0   -0.20    0.90
   0   7   0   -1.10    1.50
   0  -7   0    2.70    2.80
   1  -7   0   20.70    2.60
  -1  -7   0   18.40    3.90
  -1   7   0   18.30    4.00
   1  -7   0   17.30    4.20
  -2   7   0  154.28   11.70
   2  -7   0  156.28    8.60
  -2  -7   0  156.88    9.80
   2  -7   0  174.08   11.80
   3  -7   0  318.47   17.40
  -3   7   0  300.67   19.00
   3  -7   0  310.27   14.90
  -3  -7   0  282.37   14.40
   4  -7   0   71.39    8.30
   4  -7   0   50.09    6.00
   5  -7   0   13.20    5.00
   5  -7   0   21.00    5.00
   6  -7   0  333.27   18.60
   6  -7   0  304.77   19.10
   7  -7   0   61.09    8.40
   8  -7   0   44.30    8.80
   0  -8   0 2481.95   94.19
   1  -8   0   17.00    2.50
  -1  -8   0   20.00    4.50
  -1   8   0   10.10    3.30
   1  -8   0   16.80    4.50
   2  -8   0 1178.58   48.40
  -2   8   0 1103.19   48.00
   2  -8   0 1116.69   44.10
  -2  -8   0 1215.48   46.40
   3  -8   0    8.50    4.50
   3  -8   0    4.50    2.90
  -3  -8   0    3.50    2.40
  -3   8   0    2.80    3.90
   4  -8   0   57.09    8.20
   4  -8   0   36.70    5.50
   5  -8   0    5.90    4.70
   5  -8   0   14.80    4.60
   6  -8   0   21.50    6.60
   6  -8   0    8.50    4.20
   7  -8   0   79.09    9.50
   0  -9   0    0.30    3.40
  -1  -9   0   88.29    8.40
   1  -9   0   88.19    9.20
  -2  -9   0  287.77   16.10
   2  -9   0  273.27   17.70
  -2   9   0  305.57   18.40
  -3   9   0  439.96   25.70
   3  -9   0  485.05   21.60
   3  -9   0  485.55   25.80
  -3  -9   0  494.55   22.70
   4  -9   0   93.79   10.70
   4  -9   0   91.59    8.20
   5  -9   0  230.48   17.70
   5  -9   0  278.37   16.00
   6  -9   0   20.00    6.90
   6  -9   0   19.80    5.80
   7  -9   0  180.58   17.20
   7  -9   0  199.28   14.80
   0 -10   0   -0.20    3.80
   1 -10   0    2.50    3.30
  -1 -10   0    6.00    4.10
  -2 -10   0   70.79    8.20
   2 -10   0   66.29    9.30
   3 -10   0   46.90    8.50
   4 -10   0   -5.90    4.10
   5 -10   0   27.80    8.10
   5 -10   0   33.50    6.20
   6 -10   0    5.20    4.40
   6 -10   0    9.40    6.80
   0 -11   0   -2.90    3.40
  -1 -11   0  197.68   14.50
   1 -11   0  189.58   15.30
   2 -11   0    5.30    5.20
   3 -11   0   34.40    8.60
   4 -11   0   36.00    9.10
   5 -11   0  102.69   12.80
   6 -11   0    6.90    6.40
   0 -12   0  217.48   16.40
  -1 -12   0   20.50    6.60
   1 -12   0   29.80    7.50
   2 -12   0   70.29   11.60
  -2 -12   0   48.80    8.30
   3 -12   0   89.49   12.50
   4 -12   0  118.89   14.10
   5 -12   0   42.50   10.50
   0 -13   0    0.60    4.60
   1 -13   0   26.40    8.20
  -1 -13   0   26.30    7.10
  -2 -13   0   42.80    8.30
   3 -13   0    6.60    6.90
   4 -13   0  116.09   14.60
   0 -14   0   71.99   11.70
  -1 -14   0   37.60    8.50
   1 -14   0   26.60    8.50
   2 -14   0   59.99   11.40
   3 -14   0   46.30   11.20
   0   0   1   -0.10    0.60
   0   0  -1    0.20    0.40
  -1   0   1 3691.43  139.09
   1   0   1 3951.50  138.69
   1   0  -1 3933.01  138.79
  -1   0   1 4071.29  140.19
  -2   0   1  934.71   37.00
   2   0  -1  929.81   34.50
   2   0   1  891.51   33.60
   2   0   1  938.31   34.50
   2   0  -1  964.80   34.30
  -2   0   1  913.71   34.90
   3   0  -1  679.03   26.90
  -3   0   1  681.53   30.20
   3   0  -1  691.03   26.30
   3   0   1  700.53   25.80
   3   0   1  675.13   26.90
   4   0   1  531.05   20.90
  -4   0   1  569.94   27.00
   4   0  -1  542.95   22.60
   4   0   1  540.35   22.60
   4   0  -1  521.95   21.50
   5   0  -1   14.20    3.50
   5   0   1   20.30    3.80
   6   0  -1  340.47   17.40
   6   0   1  326.47   17.10
   7   0  -1   15.10    4.60
   7   0   1    9.10    4.00
   8   0  -1  483.25   24.80
   8   0   1  496.55   24.90
   9   0  -1    3.40    4.10
   9   0   1    6.80    4.50
   1   1  -1  839.52   30.10
   1  -1   1  813.92   30.40
   1  -1   1  817.22   30.50
  -1   1   1  856.61   32.20
  -1   1  -1  812.52   31.70
  -1  -1   1  829.92   31.00
   1   1   1  859.61   30.10
  -1  -1   1  829.72   30.30
   1  -1  -1  814.72   30.80
  -2   1   1  613.64   26.50
   2   1  -1  645.14   23.60
  -2  -1  -1  595.34   22.70
   2  -1   1  613.04   23.60
   2  -1   1  617.64   23.90
  -2  -1   1  608.54   23.70
  -2  -1   1  635.14   25.60
   2  -1  -1  623.14   23.90
   2   1   1  624.84   22.50
  -2   1  -1  614.04   26.20
   2   1   1  647.14   23.60
   2  -1  -1  636.44   24.10
   3   1  -1   26.40    3.00
  -3   1   1   34.00    5.80
   3  -1   1   29.50    2.90
   3   1  -1   27.40    2.60
   3  -1  -1   36.20    3.30
   3   1   1   33.20    3.20
   3   1   1   33.00    2.10
  -3  -1   1   27.50    3.50
  -3  -1   1   20.60    4.20
   3  -1  -1   32.80    3.20
   4   1  -1 1119.89   42.20
   4   1  -1 1140.59   41.00
   4  -1   1 1117.39   41.40
  -4   1   1 1007.90   46.90
   4  -1   1 1100.09   42.60
   4  -1  -1 1101.49   42.70
   4  -1  -1 1081.19   41.80
   4   1   1 1070.39   42.00
   5   1  -1   68.69    6.20
   5  -1   1   74.29    6.50
   5  -1  -1   71.49    6.20
   5  -1  -1   81.79    6.00
   5   1   1   73.29    5.90
   6  -1   1  313.77   17.20
   6   1  -1  360.66   17.20
   6   1   1  335.87   17.00
   6  -1  -1  333.37   17.60
   7  -1   1   98.59    9.40
   7   1  -1  136.99   10.00
   7  -1  -1  120.39   10.00
   7   1   1  121.19    9.50
   8   1  -1   48.20    7.10
   8  -1   1   53.69    7.70
   8  -1  -1   61.29    8.20
   8   1   1   68.69    7.90
   9   1  -1   17.50    5.30
   9  -1   1   13.50    5.50
   9  -1  -1   29.90    7.00
   9   1   1   13.20    4.70
   0   2  -1  315.47   12.00
   0  -2  -1  333.17   12.80
   0  -2   1  305.57   11.60
   0   2   1  296.47   13.00
   0  -2   1  336.37   12.80
   1  -2   1 4910.71  178.38
   1  -2   1 4976.00  177.78
  -1   2   1 5042.20  179.98
  -1   2  -1 5074.99  179.38
  -1  -2   1 5024.00  177.88
   1  -2  -1 5039.20  178.68
  -2  -2  -1   90.99    4.10
   2  -2   1   91.29    5.60
   2   2  -1   97.99    4.60
  -2   2   1   78.09    7.60
  -2  -2   1   95.09    4.80
  -2   2  -1   93.39    7.60
   2  -2  -1   81.59    5.20
   2  -2  -1   83.19    5.60
   2   2   1   93.09    4.50
  -3   2   1   17.70    4.90
   3   2  -1   22.40    2.50
  -3  -2  -1   21.00    2.20
   3  -2   1   21.70    3.10
   3  -2   1   21.20    2.90
   3   2   1   22.70    2.70
   3  -2  -1   20.30    3.00
  -3   2  -1   16.30    4.90
  -3  -2   1   21.40    2.80
   3  -2  -1   16.50    2.80
   4   2  -1  199.18    8.70
   4  -2   1  188.38   10.20
  -4   2   1  183.18   14.20
   4   2  -1  180.38    9.50
   4  -2   1  173.98    9.60
   4  -2  -1  194.78   10.50
   4   2   1  191.78    9.50
  -4  -2   1  188.88    9.70
   4  -2  -1  182.18   10.00
   5   2  -1 1381.96   51.79
  -5   2   1 1372.66   59.39
   5  -2   1 1339.97   52.69
   5  -2   1 1329.77   51.39
   5  -2  -1 1280.67   51.79
   5  -2  -1 1379.76   52.89
   5   2   1 1350.16   51.59
   6  -2   1  253.87   14.60
   6   2  -1  257.07   13.80
   6   2   1  244.88   13.40
   6  -2  -1  245.08   14.50
   7   2  -1    7.60    3.60
   7  -2   1   16.30    5.00
   7  -2  -1   14.70    4.90
   7   2   1   12.80    4.00
   8   2  -1   64.49    7.60
   8  -2   1   70.89    8.50
   8  -2  -1   55.39    7.30
   8   2   1   47.10    6.70
   9   2  -1   27.80    6.00
   9  -2  -1   26.20    6.40
   9   2   1   16.00    5.00
   0  -3  -1 1214.98   45.70
   0  -3   1 1239.48   43.90
   0   3   1 1209.78   45.80
   0  -3   1 1242.08   45.70
   0   3  -1 1231.98   44.60
   1   3  -1  101.49    4.00
   1  -3   1   95.59    5.00
  -1   3   1  107.89    7.40
  -1  -3  -1  103.09    5.60
   1  -3   1  110.89    6.20
   1  -3  -1  107.59    6.40
  -1  -3   1   99.59    5.60
   2  -3   1  358.66   15.90
   2  -3   1  346.27   15.10
  -2  -3  -1  380.86   14.40
  -2   3   1  376.56   18.50
   2   3  -1  347.67   13.90
   2  -3  -1  355.56   16.20
  -2   3  -1  365.76   17.90
  -2  -3   1  358.56   14.70
   2  -3  -1  378.86   15.40
   2   3   1  370.26   14.00
  -3   3   1  880.11   38.80
   3   3  -1  914.81   33.10
   3  -3   1  846.72   34.20
   3  -3   1  908.31   34.80
  -3  -3  -1  919.61   32.50
  -3  -3   1  883.01   33.30
   3   3   1  874.31   32.90
   3  -3  -1  894.11   35.10
   3  -3  -1  820.32   34.20
  -3   3  -1  833.82   37.90
   4   3  -1   57.99    4.30
   4  -3   1   50.09    4.90
  -4   3   1   58.19    8.50
   4  -3   1   46.50    5.00
   4  -3  -1   48.30    5.10
  -4  -3   1   53.29    4.60
   4   3   1   44.60    3.90
   4  -3  -1   52.79    5.10
   5  -3   1  361.46   17.00
   5  -3   1  338.27   16.30
  -5   3   1  346.77   22.20
   5   3  -1  318.77   15.20
   5  -3  -1  316.17   16.30
   5   3   1  329.97   15.20
   5  -3  -1  308.07   16.40
   6   3  -1  163.08    9.80
   6  -3   1  151.78   10.90
   6   3   1  150.98    9.60
   6  -3  -1  155.58   11.10
   6  -3  -1  133.49   10.60
   7  -3   1   28.80    6.20
   7   3  -1   33.20    5.40
   7  -3  -1   29.40    6.20
   7   3   1   23.70    5.00
   8  -3   1   60.69    8.40
   8   3  -1   45.80    6.40
   8  -3  -1   63.69    7.80
   8   3   1   44.20    6.30
   9   3  -1  113.09   15.20
   9  -3   1   90.19   10.50
   9  -3  -1  100.39   11.00
   9   3   1  116.69   10.00
   0  -4   1   84.09    3.70
   0  -4  -1   85.79    5.70
   0   4  -1   86.29    4.80
   0   4   1   76.09    5.60
   0  -4   1   80.69    5.40
  -1   4   1  380.66   17.60
  -1  -4  -1  381.46   15.90
   1  -4   1  366.56   16.70
   1  -4   1  380.56   14.90
  -1  -4   1  383.76   16.10
   1  -4  -1  360.16   16.70
   2  -4   1  156.98    8.00
  -2  -4  -1  167.18    7.80
   2  -4   1  159.18    9.20
  -2  -4   1  165.48    8.10
   2   4   1  159.08    6.80
   2  -4  -1  155.48    8.10
   2  -4  -1  155.68    9.20
  -2   4  -1  148.99   10.40
  -3   4   1 2066.89   82.79
   3  -4   1 2112.39   78.99
   3   4  -1 2139.59   75.99
   3  -4   1 2088.69   77.89
  -3  -4  -1 2147.39   76.19
  -3  -4   1 2088.49   76.89
   3  -4  -1 2107.69   77.99
  -3   4  -1 2180.28   82.69
   3   4   1 2093.99   76.09
   3  -4  -1 2070.09   79.09
   4   4  -1  274.27   12.50
   4  -4   1  278.97   14.70
   4  -4   1  287.17   14.50
   4  -4  -1  289.87   14.60
  -4  -4   1  306.37   13.30
   4   4   1  295.57   12.70
   4  -4  -1  303.47   15.20
  -5   4   1  233.68   18.40
   5  -4   1  218.18   12.70
   5  -4   1  227.48   13.00
   5   4  -1  207.08   10.80
   5   4   1  210.08   10.70
   5  -4  -1  227.38   13.00
   5  -4  -1  229.78   13.10
   6  -4   1   11.00    3.80
   6  -4   1    5.80    3.10
   6  -4  -1   10.80    3.70
   6   4   1   14.20    3.40
   6  -4  -1    8.80    4.30
   7  -4   1  139.39   11.40
   7   4  -1  122.39    8.90
   7   4   1  133.99    9.10
   7  -4  -1  134.99   11.30
   8  -4   1   74.39    9.40
   8   4   1   82.19    8.40
   9  -4   1    4.80    4.80
   0  -5  -1   18.10    3.50
   0  -5   1   21.20    1.70
   0   5   1   24.30    3.50
   0  -5   1   22.30    3.60
   0   5  -1   24.20    2.60
   1  -5   1  138.49    8.80
  -1  -5  -1  146.09    8.30
   1  -5   1  150.18    7.00
  -1   5   1  165.48    9.90
   1  -5  -1  145.49    8.80
  -1   5  -1  160.18    9.10
   1   5   1  137.39    7.50
  -1  -5   1  136.19    8.20
   2   5  -1  862.31   30.10
  -2  -5  -1  855.31   32.30
  -2   5   1  825.52   36.00
   2  -5   1  794.62   34.00
   2  -5   1  836.02   32.10
  -2   5  -1  775.42   35.00
   2  -5  -1  864.71   32.30
   2   5   1  855.41   30.50
   2  -5  -1  819.32   34.20
  -2  -5   1  788.92   32.30
  -3   5   1    8.30    4.50
  -3  -5  -1    3.40    1.50
   3  -5   1    3.70    2.70
   3   5  -1    3.00    1.00
   3  -5   1    1.90    1.90
   3   5   1    3.70    1.20
  -3   5  -1    4.30    4.00
  -3  -5   1    5.30    2.00
   3  -5  -1    2.90    2.80
   3  -5  -1    1.80    2.00
   4   5  -1  217.18    9.70
   4  -5   1  214.38   12.00
   4  -5   1  234.98   13.30
   4   5   1  215.08    9.80
   4  -5  -1  216.38   12.10
   4  -5  -1  199.98   12.90
   5  -5   1  135.59   10.30
   5  -5   1  147.19   10.20
   5   5  -1  141.09    7.70
  -5   5   1  164.98   15.70
   5   5   1  130.29    7.60
   5  -5  -1  162.28   10.60
   6  -5   1   52.29    7.10
   6  -5   1   53.99    7.20
   6   5   1   41.20    4.40
   6  -5  -1   47.90    6.90
   6  -5  -1   61.39    7.20
   7  -5   1   57.09    7.80
   7  -5  -1   43.90    6.60
   8  -5   1   44.30    8.30
   8  -5  -1   51.19    7.60
   0   6  -1  596.84   23.40
   0   6   1  593.24   24.70
   0  -6   1  611.24   22.10
   0  -6   1  564.34   25.40
  -1  -6  -1  318.47   15.00
   1  -6   1  327.87   12.90
  -1   6   1  297.67   15.70
   1  -6   1  278.27   15.40
  -1  -6   1  293.57   14.70
   1  -6  -1  287.77   15.50
   1   6   1  316.57   13.80
  -1   6  -1  315.87   15.20
  -2   6   1   84.79    8.60
   2  -6   1   77.09    5.40
  -2  -6  -1   78.99    5.90
   2  -6   1   87.89    7.60
   2  -6  -1   82.79    7.50
  -2  -6   1   89.89    6.20
   2  -6  -1   80.29    5.70
  -2   6  -1   77.19    7.70
  -3   6   1  397.76   22.20
  -3  -6  -1  391.36   17.00
   3  -6   1  374.56   17.50
   3  -6   1  383.26   19.70
   3   6   1  411.76   15.50
   3  -6  -1  369.76   19.50
  -3  -6   1  385.06   17.20
  -3   6  -1  411.06   22.00
   3  -6  -1  376.56   17.60
   4  -6   1   73.09    6.70
  -4   6   1   90.69   11.20
   4  -6   1   98.49    8.70
   4  -6  -1   78.69    7.00
   4  -6  -1   77.29    8.10
   5  -6   1  248.68   14.90
   5  -6   1  258.47   16.10
  -5   6   1  292.97   21.70
   5  -6  -1  278.57   15.30
   5  -6  -1  273.77   16.30
   6  -6   1  167.38   12.70
   6  -6  -1  170.18   12.00
   6  -6  -1  165.48   12.90
   7  -6   1   39.00    7.40
   7  -6  -1   31.00    6.90
   8  -6   1   16.70    6.10
   0  -7   1   61.39    6.40
   0  -7   1   58.49    3.20
   0   7  -1   51.39    4.20
   0   7   1   54.29    5.20
   0  -7  -1   51.49    6.00
   1  -7   1  131.09    6.70
   1  -7   1  120.89    9.40
  -1   7   1  125.99    9.20
  -1  -7  -1  130.99    8.90
  -1   7  -1  123.79    8.60
   1  -7  -1  136.89    7.00
  -1  -7   1  115.89    8.60
   1  -7  -1  148.69    9.90
   2  -7   1  522.55   22.10
  -2  -7  -1  546.25   23.50
   2  -7   1  540.05   25.40
  -2   7   1  528.25   26.10
  -2  -7   1  554.34   23.70
  -2   7  -1  508.35   25.30
   2  -7  -1  562.44   25.70
   2  -7  -1  555.54   22.40
   3  -7   1   94.79    9.10
   3  -7   1  107.99    7.50
  -3   7   1   86.09   10.00
  -3  -7  -1  104.19    7.10
  -3   7  -1  111.49   10.90
   3  -7  -1  108.89    7.50
   3  -7  -1   92.99    8.60
  -3  -7   1  113.39    7.50
   4  -7   1  552.24   27.40
   4  -7   1  550.54   25.00
  -4   7   1  559.54   31.00
   4  -7  -1  575.34   25.40
   4  -7  -1  594.34   27.90
   5  -7   1  135.59   10.50
   5  -7   1  141.59   12.20
  -5   7   1  163.08   16.30
   5  -7  -1  168.08   12.90
   5  -7  -1  171.68   11.50
   6  -7   1  129.39   12.30
   6  -7   1  150.98   11.50
   6  -7  -1  144.29   12.50
   6  -7  -1  147.39   11.50
   7  -7   1   20.90    6.20
   7  -7  -1   18.70    6.00
   8  -7   1   38.90    8.30
   8  -7  -1   39.00    8.10
   0  -8  -1   39.00    6.20
   0  -8   1   28.40    5.50
  -1  -8  -1   84.89    7.70
  -1   8   1   76.79    7.30
   1  -8   1   84.79    7.90
   1  -8  -1   91.19    5.50
  -1   8  -1   95.79    7.40
  -1  -8   1   79.39    7.50
   1  -8  -1   84.39    7.90
   2  -8   1  210.38   13.90
   2  -8   1  193.48   10.20
  -2   8   1  196.58   13.90
  -2  -8  -1  200.18   11.80
  -2   8  -1  210.48   13.50
  -2  -8   1  199.78   11.90
   2  -8  -1  185.08   13.50
   2  -8  -1  204.98   10.60
  -3  -8  -1   46.70    5.50
   3  -8   1   71.49    8.40
   3  -8   1   55.69    5.50
  -3   8   1   63.39   10.00
  -3  -8   1   63.39    6.20
   3  -8  -1   47.60    5.50
   3  -8  -1   50.49    7.60
   4  -8   1   58.49    6.40
   4  -8   1   61.39    8.30
  -4   8   1   54.59   10.20
   4  -8  -1   62.19    8.50
   4  -8  -1   56.49    6.80
   5  -8   1    5.40    4.50
   5  -8   1    2.10    3.30
   5  -8  -1    7.60    4.70
   5  -8  -1    6.80    3.80
   6  -8   1  193.58   15.60
   6  -8   1  218.18   14.10
   6  -8  -1  208.48   14.20
   6  -8  -1  167.18   14.90
   7  -8   1   60.49    8.70
   7  -8  -1   57.29   13.60
   7  -8  -1   71.49    9.10
   0  -9   1  253.07   15.80
   0  -9  -1  274.67   16.20
   1  -9   1   18.10    5.10
  -1  -9  -1   23.80    5.40
  -1  -9   1   22.30    5.10
   1  -9  -1   37.20    6.50
  -2  -9  -1   -2.10    2.30
   2  -9   1   -4.50    3.40
  -2   9   1   -3.90    3.20
  -2  -9   1   -0.10    2.60
   2  -9  -1   -3.00    3.20
   3  -9   1  231.98   15.30
  -3   9   1  192.98   15.40
  -3  -9  -1  206.98   13.20
   3  -9   1  198.88   11.60
   3  -9  -1  212.98   11.90
   3  -9  -1  220.78   15.60
   4  -9   1   52.69    6.60
   4  -9   1   54.19    9.20
  -4   9   1   47.30   10.00
   4  -9  -1   49.30    6.50
   4  -9  -1   61.09    9.10
   5  -9   1  143.59   13.30
   5  -9   1  146.19   11.00
   5  -9  -1  143.79   11.00
   5  -9  -1  158.38   13.80
   6  -9   1   27.30    6.30
   6  -9   1   17.30    7.00
   6  -9  -1   44.20    9.10
   6  -9  -1   31.90    6.60
   7  -9   1  127.89   12.00
   7  -9  -1  136.79   12.40
   7  -9  -1  136.19   14.20
   0 -10  -1   49.00    8.10
   0 -10   1   34.50    7.10
   1 -10   1  106.19   10.90
  -1 -10   1  102.59    9.70
   1 -10  -1  134.59   11.60
   2 -10   1   89.59   10.30
  -2 -10  -1   90.69    8.70
  -2 -10   1   94.29    8.80
   2 -10  -1   99.69   10.90
   3 -10   1  183.98   14.50
   3 -10  -1  162.88   13.60
  -3 -10   1  138.29   11.50
   4 -10   1   -1.90    4.40
   4 -10  -1    0.90    5.10
   5 -10   1   89.49    8.60
   5 -10   1   82.09   11.10
   5 -10  -1   83.19   11.50
   5 -10  -1   92.19    9.00
   6 -10   1   16.70    6.90
   6 -10   1   15.00    5.10
   6 -10  -1   12.40    5.30
   6 -10  -1   21.40    8.10
   0 -11  -1  179.58   14.10
  -1 -11  -1   17.80    5.50
  -1 -11   1   26.70    6.30
   1 -11  -1   28.50    7.40
   2 -11   1  116.49   12.20
  -2 -11  -1  101.89    9.80
  -2 -11   1   98.99    9.70
   2 -11  -1  100.59   10.90
   3 -11   1  121.19   12.80
   3 -11  -1  107.49   12.20
   4 -11   1   31.20    8.50
   4 -11  -1   51.79   10.30
   5 -11   1   67.19   12.00
   5 -11  -1   41.20    9.80
   6 -11   1   16.40    7.70
   6 -11  -1    1.90    6.10
   0 -12   1    7.20    5.00
   0 -12  -1    2.90    5.10
  -1 -12  -1   12.20    5.70
   1 -12   1    1.70    3.80
   1 -12  -1    0.50    4.70
  -1 -12   1    7.20    5.00
  -2 -12  -1  117.29   11.20
   2 -12   1   93.39   12.10
  -2 -12   1  102.79   11.10
   2 -12  -1  125.19   13.60
   3 -12   1  113.59   13.50
   3 -12  -1   99.39   12.70
   4 -12   1   29.30    8.90
   4 -12  -1   23.30    8.70
   5 -12   1   -6.40    5.00
   5 -12  -1   -5.10    5.70
   0 -13   1  133.99   13.30
   0 -13  -1  145.99   13.80
   1 -13   1   58.29   10.90
  -1 -13  -1   76.99   10.20
  -1 -13   1   71.99   10.60
   1 -13  -1   72.29   11.00
   2 -13   1   55.69   11.50
  -2 -13   1   55.99    9.30
   2 -13  -1   64.29   11.80
   3 -13  -1   19.20    8.60
   4 -13   1  137.49   15.40
   4 -13  -1  132.79   15.70
   0 -14  -1   10.10    6.10
  -1 -14  -1   25.60    7.90
   1 -14   1   27.10    8.10
   1 -14  -1   35.60    9.20
  -1 -14   1   25.20    7.70
   2 -14  -1   79.49   13.10
   3 -14   1    2.50    6.10
   3 -14  -1   -0.40    5.20
  -1   0   2   22.90    3.30
  -1   0   2   21.30    2.60
   1   0   2   23.10    1.40
   1   0   2   26.10    1.90
  -2   0   2 1282.87   49.10
   2   0  -2 1329.47   48.30
  -2   0   2 1306.97   50.79
   2   0   2 1313.77   48.10
   2   0  -2 1343.27   48.30
   2   0   2 1311.77   47.20
   3   0   2  128.99    7.10
  -3   0   2  141.09    8.10
   3   0  -2  140.89    7.10
  -3   0   2  140.39    9.90
   3   0  -2  135.29    7.20
   3   0   2  126.99    5.90
   4   0  -2  329.07   15.40
  -4   0   2  313.77   18.90
   4   0  -2  333.17   14.90
   4   0   2  363.26   13.80
   4   0   2  347.37   15.60
   5   0  -2  120.49    7.80
   5   0   2  123.69    8.10
   5   0  -2  124.29    8.40
   6   0  -2  600.84   27.20
   6   0   2  614.24   27.00
   7   0  -2    8.40    3.40
   7   0   2    1.80    3.10
   8   0  -2   11.20    4.80
   8   0   2   12.30    4.80
   9   0   2    2.80    4.30
   9   0  -2   11.40    5.30
   0   1   2 3150.68  108.79
   0  -1  -2 2958.70  108.79
   0  -1   2 3070.69  108.79
  -1   1   2 3740.43  133.19
   1  -1   2 3752.92  131.09
   1  -1   2 3695.73  130.89
  -1  -1   2 3538.05  131.69
   1   1   2 3677.83  130.59
   1  -1  -2 3731.93  131.59
  -1  -1   2 3661.83  131.09
   2   1  -2  365.06   14.50
  -2   1   2  383.36   18.00
   2  -1   2  368.76   14.90
   2  -1   2  371.36   14.50
  -2  -1   2  356.76   15.10
   2   1   2  350.96   14.40
   2  -1  -2  380.56   15.30
  -2  -1   2  357.76   16.70
   3   1  -2 1385.76   49.99
   3  -1   2 1410.56   49.50
   3  -1   2 1281.97   50.09
  -3   1   2 1273.87   53.99
   3   1   2 1319.27   49.80
   3  -1  -2 1279.37   50.19
  -3  -1   2 1405.26   50.69
  -3  -1   2 1359.86   53.29
   3  -1  -2 1364.76   50.39
   4  -1   2   95.79    5.50
  -4   1   2   83.59    9.60
   4   1  -2  100.79    5.60
   4  -1   2   98.19    6.60
   4   1  -2   86.69    6.10
   4  -1  -2   84.69    6.40
  -4  -1   2   78.69    6.30
  -4  -1   2   83.79    8.80
   4   1   2   82.09    5.90
   4  -1  -2   82.69    5.90
   5   1  -2   67.99    6.00
  -5   1   2   65.49    9.70
   5   1   2   60.59    5.60
   5  -1  -2   61.49    6.10
   5  -1  -2   62.59    5.40
   6  -1   2  160.68   10.90
   6   1  -2  161.18   10.60
   6   1   2  178.08   10.80
   6  -1  -2  150.78   10.90
   7  -1   2  100.89    8.70
   7   1  -2   93.99    8.70
   7   1   2  110.89    8.90
   7  -1  -2   90.49    8.40
   8  -1   2   90.29    9.40
   8   1  -2   90.99    9.10
   8  -1  -2   86.99    9.50
   8   1   2   81.89    8.60
   9   1  -2   18.50    5.80
   9  -1   2   37.60    7.40
   9   1   2   26.50    6.20
   9  -1  -2   34.90    7.30
   0   2   2 8221.98  291.97
   1  -2   2 2574.84   87.89
  -1  -2  -2 2469.75   86.89
   1  -2   2 2469.75   86.99
   1   2  -2 2365.86   86.29
  -1   2   2 2298.07   89.49
  -1  -2   2 2427.66   87.29
   1   2   2 2522.95   86.69
   1  -2  -2 2427.86   88.09
  -1  -2   2 2344.47   86.99
  -2   2   2 1828.22   71.69
   2  -2   2 1884.61   68.59
   2   2  -2 1871.21   67.59
  -2  -2  -2 1924.91   66.79
   2  -2  -2 1928.81   69.19
  -2  -2   2 1843.42   69.39
  -2  -2   2 1833.92   68.09
   2   2   2 1902.71   67.59
   3  -2   2  293.97   12.90
   3  -2   2  277.77   13.00
  -3   2   2  279.27   16.50
   3   2  -2  291.47   12.40
   3  -2  -2  292.37   13.50
  -3  -2   2  286.67   13.00
   3  -2  -2  287.17   13.10
   3   2   2  290.97   12.30
   4   2  -2  573.84   22.40
  -4   2   2  546.75   28.00
   4  -2   2  540.35   22.20
   4  -2   2  515.75   22.80
   4  -2  -2  529.95   23.10
  -4  -2   2  554.34   22.80
   4   2   2  546.95   22.10
   4  -2  -2  501.05   22.70
   5   2  -2   61.39    5.50
  -5   2   2   58.19   10.00
   5  -2   2   52.29    5.00
   5  -2   2   50.19    5.80
   5   2   2   68.79    5.60
   5  -2  -2   54.59    5.70
   5  -2  -2   62.39    6.30
   6   2  -2   47.80    5.60
   6  -2   2   46.70    6.30
   6   2   2   41.30    5.20
   6  -2  -2   53.89    6.10
   7  -2   2  107.39    9.60
   7   2  -2  100.69    8.70
   7  -2  -2  104.59    9.70
   7   2   2   98.49    8.40
   8  -2   2   71.29    8.80
   8   2  -2   75.89    8.10
   8   2   2   71.99    7.70
   8  -2  -2   70.49    8.10
   9  -2   2   62.29    8.70
   9  -2  -2   63.09    9.10
   9   2   2   59.49    7.80
   0   3   2  513.65   21.40
   0  -3   2  539.65   20.70
   0  -3  -2  510.25   20.60
   0  -3   2  512.75   18.70
   1  -3   2 1646.54   62.59
   1  -3   2 1665.93   61.29
  -1  -3  -2 1679.93   61.69
  -1   3   2 1711.53   64.39
  -1  -3   2 1690.13   62.09
   1  -3  -2 1734.83   62.99
   1   3   2 1767.52   60.79
   2   3  -2  393.86   15.40
   2  -3   2  390.76   16.50
  -2  -3  -2  412.66   15.80
  -2   3   2  397.26   20.10
   2  -3   2  383.36   17.30
   2   3   2  431.36   15.70
  -2  -3   2  427.46   16.60
   2  -3  -2  409.66   17.80
  -3   3   2  486.25   24.80
   3  -3   2  473.95   20.60
   3   3  -2  461.25   19.10
  -3  -3  -2  508.55   18.30
   3  -3  -2  498.65   21.30
   3  -3  -2  463.05   20.30
  -3  -3   2  503.65   19.90
   3   3   2  497.45   19.20
   4   3  -2  246.28   11.70
   4  -3   2  253.27   12.80
   4  -3   2  248.18   12.90
  -4   3   2  256.57   17.60
   4  -3  -2  234.78   13.00
   4   3   2  256.97   11.60
   4  -3  -2  268.87   13.20
  -4  -3   2  271.57   12.50
   5  -3   2  457.85   21.00
   5  -3   2  442.06   20.20
  -5   3   2  452.75   26.70
   5   3  -2  447.96   19.60
   5  -3  -2  468.95   21.20
   5   3   2  420.06   19.10
   5  -3  -2  436.36   20.80
   6  -3   2  325.27   17.60
   6   3  -2  330.27   16.30
   6  -3  -2  300.97   16.70
   6  -3  -2  340.27   17.80
   6   3   2  348.87   16.20
   7  -3   2   40.90    7.00
   7   3  -2   44.90    6.10
   7   3   2   40.90    5.50
   8  -3  -2   11.00    4.80
   8   3   2   11.40    4.00
   9  -3   2   57.09    9.40
   9   3   2   59.39    7.90
   9  -3  -2   68.99    9.60
   0  -4   2 1147.89   44.00
   0   4   2 1175.18   44.50
   0  -4  -2 1147.89   44.00
   0  -4   2 1158.58   41.40
  -1  -4  -2 1043.90   40.10
   1  -4   2 1084.39   39.00
  -1   4   2 1120.69   42.70
   1  -4  -2  988.60   40.90
  -1  -4   2 1056.79   40.30
  -1   4  -2 1081.19   41.00
   2  -4   2  207.68   10.10
  -2   4   2  218.38   13.60
  -2  -4  -2  225.18    9.90
   2   4  -2  215.38    8.60
   2  -4   2  229.78   11.70
  -2  -4   2  215.78   10.20
   2  -4  -2  213.08   11.70
  -2   4  -2  230.38   12.90
   2   4   2  232.08    9.20
  -3   4   2  156.58   12.40
   3  -4   2  188.08   10.50
   3   4  -2  180.28    7.90
  -3  -4  -2  181.08    7.80
   3  -4   2  166.68    9.20
  -3  -4   2  177.68    8.90
   3   4   2  164.18    7.80
   3  -4  -2  172.28    9.40
   3  -4  -2  173.78   10.50
   4  -4   2  103.39    8.00
   4   4  -2  112.29    6.30
   4  -4   2  109.89    7.70
  -4   4   2  104.89   11.60
   4  -4  -2  122.99    8.00
  -4  -4   2  109.09    6.90
   4   4   2  112.29    6.10
   4  -4  -2   91.79    7.70
   5  -4   2  620.84   27.70
   5   4  -2  610.84   25.60
  -5   4   2  674.83   35.10
   5  -4   2  679.83   28.20
   5  -4  -2  625.14   28.20
   5   4   2  581.64   25.30
   5  -4  -2  662.93   28.20
   6  -4   2   48.80    6.60
   6   4  -2   47.80    5.20
   6  -4  -2   50.19    6.80
   6  -4  -2   42.70    6.00
   6   4   2   35.50    4.50
   7   4  -2  107.69    8.10
   7  -4   2  111.19   10.10
   7   4   2   93.79    7.60
   7  -4  -2  107.39    9.60
   8  -4   2    8.20    5.00
   8   4   2   16.70    4.40
   8  -4  -2   17.10    6.00
   9  -4   2  116.19   11.70
   9  -4  -2   92.29   11.30
   0  -5   2    5.10    0.90
   0   5   2    4.20    2.50
   0  -5   2    2.50    2.30
   0  -5  -2    2.50    2.00
   1  -5   2  276.27   14.20
  -1   5   2  285.87   15.40
   1  -5   2  309.07   12.10
  -1  -5  -2  305.07   13.70
  -1   5  -2  302.57   14.10
   1  -5  -2  270.67   14.30
   1   5   2  275.67   12.90
  -1  -5   2  296.27   13.70
   2  -5   2  693.13   30.20
   2   5  -2  753.72   26.50
  -2   5   2  732.63   32.90
   2  -5   2  744.93   28.50
  -2  -5  -2  732.53   28.70
   2  -5  -2  698.23   30.60
  -2  -5   2  730.73   29.10
   2  -5  -2  725.83   29.00
  -2   5  -2  724.93   31.60
   2   5   2  755.42   27.20
  -3   5   2  476.45   25.40
   3  -5   2  484.05   20.60
  -3  -5  -2  499.25   19.50
   3   5  -2  475.75   18.30
   3  -5   2  448.06   21.90
   3   5   2  486.55   18.90
   3  -5  -2  482.75   22.40
   3  -5  -2  483.45   20.70
  -4   5   2   -1.60    4.30
   4  -5   2    0.70    2.70
   4   5  -2   -0.90    1.20
   4  -5   2    0.30    2.20
   4   5   2   -0.10    1.30
   4  -5  -2    0.00    2.60
   4  -5  -2   -2.10    2.10
  -4  -5   2    2.80    2.00
   5  -5   2   94.29    8.20
   5  -5   2   80.79    7.30
   5   5  -2   83.89    5.80
  -5   5   2  112.79   13.20
   5  -5  -2  104.19    8.40
   5  -5  -2   97.99    8.60
   5   5   2   92.79    5.90
   6  -5   2   94.59    8.80
   6  -5   2   78.29    8.50
   6  -5  -2   89.49    8.80
   6   5   2   80.09    6.30
   6  -5  -2  105.19    9.30
   7  -5   2  179.18   13.30
   7  -5  -2  182.48   13.20
   8  -5   2  243.28   16.60
   8  -5  -2  227.08   16.50
   0  -6   2 1271.57   44.40
   0  -6  -2 1183.78   48.20
   0  -6   2 1194.28   48.30
   0   6   2 1271.37   48.20
  -1   6   2  242.38   13.80
   1  -6   2  253.97   13.50
   1  -6   2  260.37   10.60
  -1  -6  -2  238.08   12.60
   1   6   2  245.38   12.20
   1  -6  -2  226.18   13.20
  -1  -6   2  244.08   12.50
  -2  -6  -2  893.91   35.60
   2  -6   2  893.41   37.50
  -2   6   2  856.41   39.20
   2  -6   2  902.01   34.80
  -2  -6   2  875.21   35.80
   2  -6  -2  922.41   35.40
   2   6   2  946.51   33.10
   2  -6  -2  922.71   38.00
   3  -6   2 1289.27   48.90
  -3   6   2 1253.87   54.59
  -3  -6  -2 1260.57   48.10
   3  -6  -2 1353.26   52.09
   3  -6  -2 1257.87   49.10
  -3  -6   2 1219.58   48.60
   3   6   2 1295.47   46.80
   4  -6   2  711.73   28.80
  -4   6   2  684.23   35.00
   4  -6   2  701.73   30.30
   4  -6  -2  666.43   30.70
   4  -6  -2  633.74   28.50
   4   6   2  630.44   25.80
   5  -6   2    7.20    4.00
  -5   6   2    2.00    5.40
   5  -6   2    4.70    3.10
   5  -6  -2    5.10    3.40
   5  -6  -2    7.50    4.30
   6  -6   2    6.60    4.00
   6  -6   2    5.00    4.20
   6  -6  -2    8.60    4.20
   6  -6  -2    7.40    4.00
   7  -6   2   58.99    8.20
   7  -6  -2   50.59    7.20
   8  -6   2   38.50    7.90
   8  -6  -2   21.40    6.80
   0   7   2   40.20    5.00
   0  -7   2   35.80    5.10
   0  -7  -2   37.40    5.40
  -1   7   2  153.98   10.70
  -1  -7  -2  151.78    9.60
   1  -7   2  149.09   10.40
   1  -7   2  158.18    7.40
  -1  -7   2  132.49    9.30
   1   7   2  142.59    8.70
   1  -7  -2  145.49   10.30
  -2  -7  -2  112.19    8.00
   2  -7   2  112.79    6.90
  -2   7   2  132.99   10.80
   2  -7   2  111.49    9.00
   2  -7  -2  124.99    9.50
  -2  -7   2  125.49    8.50
   2  -7  -2  123.59    7.40
  -3  -7  -2  384.96   17.70
   3  -7   2  404.96   20.90
   3  -7   2  378.66   17.80
  -3   7   2  433.26   23.70
   3  -7  -2  396.26   18.30
   3  -7  -2  437.76   21.30
  -3  -7   2  377.26   18.10
   4  -7   2  249.48   13.80
   4  -7   2  278.07   16.40
  -4   7   2  229.48   18.60
   4  -7  -2  254.87   14.10
   4  -7  -2  272.27   16.50
   5  -7   2   69.19    7.40
  -5   7   2   98.69   12.30
   5  -7   2   70.69    8.60
   5  -7  -2   79.19    7.50
   6  -7   2  106.69    9.70
   6  -7   2   91.39   10.30
   6  -7  -2  116.19   11.50
   6  -7  -2  113.29   10.00
   7  -7   2   31.10    6.90
   7  -7  -2   45.60    7.80
   8  -7   2  110.89   11.50
   8  -7  -2  120.19   12.10
   0  -8  -2    4.60    3.60
   0  -8   2    6.80    3.60
  -1  -8  -2   58.29    6.60
  -1   8   2   63.09    7.20
  -1  -8   2   67.39    6.70
   1  -8  -2   78.89    5.30
   1  -8  -2   64.09    7.10
  -2   8   2  294.97   17.70
   2  -8   2  304.37   17.10
  -2  -8  -2  302.17   15.50
   2  -8   2  281.27   13.40
   2  -8  -2  283.87   13.70
   2  -8  -2  278.77   17.10
  -2  -8   2  307.97   15.70
  -3   8   2   11.10    5.00
   3  -8   2    2.90    3.80
   3  -8   2    7.90    2.80
  -3  -8  -2    6.80    2.90
   3  -8  -2    2.10    2.40
  -3  -8   2    7.30    2.90
  -4   8   2   90.39   12.70
   4  -8   2  104.09    8.20
   4  -8  -2   88.59    9.90
   4  -8  -2  111.09    8.60
   5  -8   2   41.10    6.20
   5  -8   2   54.59    8.90
  -5   8   2   60.89   12.30
   5  -8  -2   46.10    6.70
   5  -8  -2   51.09    8.70
   6  -8   2  222.38   16.70
   6  -8   2  249.78   15.70
   6  -8  -2  274.67   16.60
   6  -8  -2  250.87   18.00
   7  -8   2    3.80    4.60
   7  -8  -2    3.50    4.80
   7  -8  -2    7.70    5.20
   0  -9  -2   29.00    6.00
   0  -9   2   35.70    6.60
   1  -9   2  609.94   29.60
  -1  -9  -2  653.63   29.00
   1  -9  -2  632.84   29.80
  -1  -9   2  595.84   28.50
  -2   9   2   31.90    7.00
  -2  -9  -2   46.10    6.10
   2  -9   2   51.69    8.10
   2  -9  -2   35.50    4.50
  -2  -9   2   49.70    6.30
   3  -9   2  205.38   11.90
  -3   9   2  201.88   16.40
   3  -9   2  215.58   15.30
   3  -9  -2  197.88   11.80
   3  -9  -2  208.08   15.40
  -3  -9   2  216.98   12.80
   4  -9   2   33.90    7.60
   4  -9   2   54.59    6.00
  -4   9   2   35.20    8.80
   4  -9  -2   40.20    6.10
   4  -9  -2   48.10    9.20
  -5   9   2    0.30    6.10
   5  -9   2    4.00    3.40
   5  -9   2    5.10    5.00
   5  -9  -2    7.30    4.00
   5  -9  -2    7.20    5.60
   6  -9   2   63.69    8.20
   6  -9   2   54.29    9.70
   6  -9  -2   72.09   10.20
   6  -9  -2   70.49    8.70
   7  -9   2   15.00    5.50
   7  -9  -2   20.20    6.60
   7  -9  -2   19.40    7.80
   0 -10   2   78.89    9.00
   0 -10  -2   64.99    7.80
  -1 -10  -2   72.89    8.30
   1 -10   2   81.19    9.40
   1 -10  -2   64.39    9.00
  -1 -10   2   79.79    8.70
   2 -10   2  113.49   11.50
  -2 -10  -2   91.49    8.70
   2 -10  -2  110.59   10.60
  -2 -10   2   93.29    9.50
   3 -10   2  112.19   11.70
  -3 -10   2  123.79    9.70
   3 -10  -2  126.99   12.30
   4 -10   2   11.50    6.00
  -4  10   2   15.70    6.90
   4 -10  -2   12.40    5.90
   5 -10   2    3.90    5.10
   5 -10  -2    6.10    4.50
   5 -10  -2   -4.80    4.90
   6 -10   2   23.30    6.00
   6 -10   2   15.60    7.00
   6 -10  -2   10.30    7.20
   6 -10  -2    6.80    4.30
   0 -11  -2   -0.40    4.30
   0 -11   2    1.60    3.90
   1 -11   2   69.89    9.00
  -1 -11  -2   82.09    9.40
  -1 -11   2   91.99    9.80
   1 -11  -2   82.29   10.30
   2 -11   2   32.30    7.70
  -2 -11  -2   32.00    6.70
   2 -11  -2   35.20    7.80
  -2 -11   2   30.30    6.60
   3 -11   2   26.90    7.80
   3 -11  -2   31.90    8.50
   4 -11   2   41.80    9.10
   4 -11  -2   60.79   11.20
   5 -11   2   73.49   12.10
   5 -11  -2   95.39   12.60
   6 -11   2  117.89   13.60
   6 -11  -2  127.09   14.30
   0 -12  -2   30.20    7.70
   0 -12   2   34.40    7.90
   1 -12   2   96.89   11.40
  -1 -12  -2   87.69   10.80
  -1 -12   2   90.29   10.20
   1 -12  -2   95.79   11.80
   2 -12   2  200.18   16.80
  -2 -12  -2  201.68   15.00
  -2 -12   2  209.68   15.20
   2 -12  -2  199.78   16.90
   3 -12   2  129.69   14.00
   3 -12  -2  127.59   13.90
   4 -12   2    0.10    5.70
   4 -12  -2    7.00    6.40
   5 -12   2   82.09   12.00
   5 -12  -2   65.79   11.90
   0 -13   2   86.29   11.30
   0 -13  -2   79.69   10.80
  -1 -13  -2    1.00    4.20
   1 -13   2    9.80    5.90
  -1 -13   2    1.90    4.80
   1 -13  -2   -4.10    4.50
   2 -13   2   14.70    6.20
  -2 -13   2   13.70    5.60
   2 -13  -2    5.40    6.90
   3 -13   2   35.30    9.20
   3 -13  -2   16.80    8.60
   4 -13   2   34.10    9.90
   4 -13  -2   54.09   11.20
   0 -14   2   78.49   11.50
   0 -14  -2  104.79   12.50
   1 -14   2   62.89   11.60
  -1 -14  -2   66.19   11.30
  -1 -14   2   51.59    9.90
   1 -14  -2   69.99   12.10
   2 -14   2   28.00    9.10
   2 -14  -2   37.30   10.10
   3 -14  -2   79.79   14.10
   0   0   3   -9.60    1.10
   0   0   3  -10.30    0.60
   1   0   3 1095.89   39.70
  -1   0   3 1114.29   42.10
  -1   0   3 1093.39   41.10
   1   0   3 1131.19   40.00
   2   0  -3   16.40    2.60
  -2   0   3   14.20    3.20
   2   0   3   12.10    2.00
   2   0   3   16.60    1.50
  -3   0   3  252.37   15.00
   3   0  -3  261.57   11.90
  -3   0   3  274.07   13.10
   3   0   3  260.27   11.70
   3   0   3  251.17   10.20
   3   0  -3  264.27   11.80
   4   0  -3  228.58   11.00
   4   0   3  226.18    9.40
  -4   0   3  232.58   15.30
   4   0   3  211.48   11.00
   4   0  -3  212.58   11.20
   5   0   3   73.09    6.20
  -5   0   3   73.49    9.10
   5   0  -3   70.49    5.70
   5   0  -3   69.99    6.00
   6   0  -3   15.40    4.00
   6   0   3    8.80    3.10
   7   0  -3  201.48   13.20
   7   0   3  202.48   13.00
   8   0   3   14.50    5.00
   8   0  -3   14.50    5.20
   9   0  -3  159.08   13.30
   9   0   3  191.98   13.70
   0  -1  -3 1311.57   47.20
   0  -1   3 1261.17   46.40
   0   1   3 1290.77   47.70
   0  -1   3 1342.27   47.20
   1  -1   3 2974.70  104.79
   1  -1   3 2905.21  104.49
  -1   1   3 2961.60  107.19
  -1   1   3 3005.70  106.19
  -1  -1  -3 2792.42  104.09
   1  -1  -3 3030.20  105.49
   1   1   3 2881.31  104.29
  -1  -1   3 2812.52  105.69
   1   1   3 3025.00  104.39
  -1  -1   3 2968.10  105.09
   2  -1   3 1631.74   57.99
  -2   1   3 1644.64   61.99
   2  -1   3 1520.15   58.29
  -2  -1   3 1560.94   58.99
   2   1   3 1625.74   57.99
   2  -1  -3 1628.14   59.09
  -2  -1   3 1601.84   60.59
   3  -1   3  234.78   10.00
   3   1  -3  215.18   10.40
   3   1  -3  220.68   10.50
  -3   1   3  234.38   14.20
   3  -1   3  229.18   10.80
  -3  -1   3  235.68   13.50
   3  -1  -3  239.58   11.10
   3   1   3  233.48   10.40
  -3  -1   3  231.98   11.60
   4  -1   3   61.69    5.10
   4   1  -3   70.99    5.00
   4  -1   3   66.39    4.40
  -4   1   3   58.49    8.40
   4   1  -3   69.29    5.30
   4   1   3   77.59    5.30
   4  -1  -3   67.99    5.40
   4  -1  -3   60.79    5.40
  -4  -1   3   68.39    6.10
  -4  -1   3   53.99    7.50
   5  -1   3  555.34   24.00
  -5   1   3  509.95   29.20
   5   1  -3  560.34   23.80
   5   1   3  553.14   23.40
   5  -1  -3  562.64   24.30
   5  -1  -3  510.55   23.30
   6   1  -3  145.79   10.30
   6  -1   3  164.98   10.80
   6  -1  -3  158.88   10.60
   6   1   3  164.88   10.30
   7   1  -3    8.90    3.80
   7  -1   3    5.00    3.80
   7  -1  -3    7.40    3.30
   7   1   3    4.90    3.30
   8  -1   3   67.49    8.20
   8   1  -3   64.49    7.90
   8   1   3   51.29    7.20
   8  -1  -3   66.49    8.50
   9   1  -3   33.60    7.00
   9  -1   3   26.30    7.00
   9   1   3   33.60    7.00
   0  -2  -3 6440.46  224.68
   0   2   3 5959.50  225.08
   0  -2   3 6557.64  224.58
  -1  -2  -3  729.23   26.80
   1  -2   3  721.13   26.70
  -1   2   3  728.53   29.80
   1  -2   3  732.63   27.60
   1  -2  -3  725.23   28.00
  -1  -2   3  705.63   27.30
  -1  -2   3  697.53   27.10
   1   2   3  747.73   26.60
   2  -2   3 1133.89   43.30
   2  -2   3 1202.98   43.70
   2   2  -3 1223.98   42.80
  -2   2   3 1196.88   47.40
  -2  -2  -3 1169.58   41.80
   2   2   3 1172.28   42.70
  -2  -2   3 1131.39   44.60
  -2  -2   3 1155.68   43.60
   2  -2  -3 1150.58   44.40
   3   2  -3  203.78    9.90
  -3   2   3  212.18   14.40
   3  -2   3  219.48   10.30
   3  -2   3  222.18   10.60
   3   2   3  216.58    9.80
  -3  -2   3  235.58   11.10
  -3  -2   3  222.58   12.60
   3  -2  -3  231.58   11.30
  -4   2   3  614.94   31.00
   4   2  -3  638.94   25.30
   4  -2   3  611.14   25.80
   4  -2   3  643.44   25.20
   4   2  -3  628.24   24.90
   4   2   3  615.94   24.90
   4  -2  -3  617.94   26.10
   4  -2  -3  609.54   26.10
  -4  -2   3  612.74   26.10
   5  -2   3  130.19    7.70
   5   2  -3  112.89    7.80
  -5   2   3   99.39   12.40
   5  -2  -3  125.89    8.90
   5  -2  -3  113.29    8.40
   5   2   3  129.29    7.90
  -6   2   3   29.90    8.80
   6   2  -3   32.10    5.10
   6  -2   3   29.00    5.00
   6  -2  -3   29.10    5.00
   6   2   3   34.60    4.80
   6  -2  -3   27.90    5.60
   7  -2   3   64.39    7.50
   7   2  -3   76.99    7.50
   7  -2  -3   56.79    7.60
   7   2   3   66.69    6.90
   8   2  -3   28.00    5.90
   8  -2   3   18.20    5.70
   8   2   3   11.30    4.40
   8  -2  -3   20.40    5.80
   9  -2   3   16.50    5.60
   9   2  -3    7.30    4.30
   9  -2  -3   15.10    5.90
   0  -3   3 1170.58   40.50
   0  -3   3 1119.89   42.40
   0   3   3 1094.29   43.60
   0  -3  -3 1151.08   42.60
  -1  -3  -3  511.65   20.10
   1  -3   3  506.65   21.00
  -1   3   3  549.85   23.30
   1  -3   3  522.55   19.60
  -1  -3   3  500.05   19.00
   1  -3  -3  512.85   21.30
  -1  -3   3  496.45   20.50
   1   3   3  539.25   19.30
   2   3  -3   15.10    1.70
  -2  -3  -3   12.60    1.90
   2  -3   3   13.40    2.30
   2  -3   3   12.40    2.70
  -2   3   3   13.80    4.40
   2  -3  -3   16.00    3.30
  -2  -3   3   19.20    2.60
   2   3   3   16.90    1.80
  -2  -3   3   11.80    2.50
   3   3  -3  863.71   31.80
   3  -3   3  813.22   32.80
  -3   3   3  828.92   37.70
   3  -3   3  868.01   33.30
   3   3   3  840.42   31.70
   3  -3  -3  786.82   33.70
  -3  -3   3  882.51   32.90
   4   3  -3  351.16   15.60
  -4   3   3  332.27   21.50
   4  -3   3  353.16   16.50
   4  -3   3  369.06   16.80
   4   3   3  357.86   15.50
   4  -3  -3  372.86   17.10
   4  -3  -3  381.46   17.70
  -4  -3   3  370.76   16.70
   5  -3   3   92.79    7.00
  -5   3   3   98.09   12.30
   5  -3   3   87.19    7.50
   5  -3  -3  106.39    8.30
   5   3   3   98.19    6.60
   5  -3  -3   93.39    7.90
   6   3  -3  182.48   11.20
   6  -3   3  190.98   12.50
  -6   3   3  220.48   19.20
   6   3   3  201.68   11.20
   6  -3  -3  192.68   12.30
   6  -3  -3  209.88   13.10
   7  -3   3  151.18   11.50
   7   3  -3  154.38   10.40
   7   3   3  155.98   10.20
   7  -3  -3  138.29   11.50
   8  -3   3  228.48   15.10
   8   3  -3  169.08   12.40
   8   3   3  196.78   12.60
   8  -3  -3  207.18   14.80
   9   3   3   31.00    5.90
   9  -3  -3   30.80    7.40
   0   4   3  163.08    9.80
   0  -4   3  177.08    6.60
   0  -4   3  160.48    8.80
  -1  -4  -3 2423.26   87.09
  -1   4   3 2453.05   90.19
   1  -4   3 2538.45   85.99
   1  -4   3 2298.97   87.89
   1  -4  -3 2343.07   88.09
  -1  -4   3 2295.87   87.29
  -2   4   3 1815.32   73.29
   2  -4   3 1882.21   68.69
  -2  -4  -3 1938.81   68.39
   2   4  -3 1919.51   67.09
   2  -4   3 1835.52   70.19
  -2  -4   3 1871.51   69.19
   2   4   3 1932.01   67.89
   2  -4  -3 1806.92   70.69
  -3  -4  -3  845.72   30.60
   3  -4   3  817.82   33.50
   3   4  -3  827.62   30.90
  -3   4   3  799.12   37.80
   3   4   3  824.42   31.20
  -3  -4   3  827.62   32.30
   3  -4  -3  833.22   34.30
   4  -4   3   13.90    3.40
   4  -4   3   10.30    3.20
  -4   4   3   15.60    5.30
   4   4  -3   15.20    2.50
   4  -4  -3   14.20    3.80
   4  -4  -3   20.60    3.90
   4   4   3   11.90    2.30
  -4  -4   3   14.20    3.20
   5   4  -3  285.07   13.20
  -5   4   3  262.47   19.90
   5  -4   3  286.57   15.00
   5  -4   3  269.57   14.80
   5   4   3  265.97   12.90
   5  -4  -3  280.97   15.50
   5  -4  -3  278.87   15.00
  -6   4   3    6.30    7.30
   6   4  -3    3.90    2.60
   6  -4   3    8.90    3.50
   6  -4  -3    9.10    4.20
   6  -4  -3   13.60    4.20
   6   4   3    6.30    2.60
   7   4  -3   52.79    6.40
   7  -4   3   76.09    7.80
   7   4   3   64.09    6.20
   7  -4  -3   69.49    7.80
   8  -4   3    4.70    4.20
   8   4   3   -1.90    2.50
   8  -4  -3    2.90    4.50
   9  -4   3  172.08   14.20
   9  -4  -3  179.78   15.00
   0  -5   3  372.66   13.60
   0   5   3  383.36   17.80
   0  -5   3  348.47   16.70
  -1   5   3  186.68   12.00
   1  -5   3  186.08   10.80
   1  -5   3  208.48    8.70
  -1  -5  -3  213.58   10.40
  -1  -5   3  196.58   10.40
   1  -5  -3  193.48   11.10
   1   5   3  193.88    9.60
  -2  -5  -3   50.79    4.20
  -2   5   3   49.30    7.10
   2  -5   3   45.80    3.90
   2  -5   3   37.20    5.00
   2   5   3   51.39    3.10
  -2  -5   3   45.10    4.30
   2  -5  -3   52.89    5.30
  -3  -5  -3  645.64   24.10
   3   5  -3  632.54   23.00
   3  -5   3  645.14   27.20
   3  -5   3  611.24   25.30
  -3   5   3  586.04   30.50
   3  -5  -3  606.84   25.70
   3   5   3  606.24   23.80
  -3  -5   3  603.84   25.10
   3  -5  -3  578.14   27.00
   4   5  -3  244.18   11.20
  -4   5   3  297.37   19.80
   4  -5   3  257.77   14.60
   4  -5   3  270.27   13.70
   4  -5  -3  270.77   13.90
   4  -5  -3  287.47   15.40
   4   5   3  250.07   11.60
  -4  -5   3  254.17   12.90
   5  -5   3  142.49    9.40
   5   5  -3  122.99    7.30
  -5   5   3  153.28   14.60
   5  -5  -3  111.79    9.80
   5  -5  -3  127.09    9.30
   5   5   3  124.19    7.30
  -6   5   3  287.97   22.40
   6  -5   3  243.98   15.10
   6  -5   3  281.47   15.80
   6   5   3  259.67   12.80
   6  -5  -3  247.48   15.50
   6  -5  -3  253.27   16.00
   7  -5   3   46.70    7.70
   7  -5  -3   37.90    6.90
   8  -5   3   12.30    5.50
   0  -6   3  281.87   10.30
   0  -6  -3  249.08   13.80
   0   6   3  263.77   14.30
  -1   6   3  132.39   10.20
   1  -6   3  138.99    9.40
   1  -6   3  138.19    6.70
  -1  -6  -3  136.59    8.60
  -1  -6   3  148.79    8.90
   1  -6  -3  130.69    9.40
   1   6   3  139.59    8.80
  -2  -6  -3   23.50    3.70
   2  -6   3   20.40    3.20
  -2   6   3   21.40    5.50
   2  -6   3   33.10    5.00
   2   6   3   22.60    2.00
   2  -6  -3   19.20    4.50
  -2  -6   3   27.90    4.20
   3  -6   3   86.39    7.80
   3  -6   3   95.49    6.50
  -3  -6  -3   83.09    5.60
   3  -6  -3   88.29    8.10
   3   6   3   78.99    4.70
   3  -6  -3   91.49    6.70
  -3  -6   3   81.29    6.40
   4  -6   3  311.07   16.90
   4  -6   3  292.27   15.00
  -4   6   3  305.07   21.10
   4  -6  -3  301.87   15.60
   4   6   3  305.17   13.20
   4  -6  -3  301.87   17.30
  -4  -6   3  290.47   14.70
  -5   6   3  194.78   18.00
   5  -6   3  178.38   12.60
   5  -6   3  199.08   12.10
   5  -6  -3  193.68   12.40
   5  -6  -3  174.98   13.10
   6  -6   3   35.40    6.60
  -6   6   3   32.60   10.40
   6  -6   3   39.10    6.70
   6  -6  -3   40.00    7.10
   6  -6  -3   38.30    7.50
   7  -6   3  173.38   13.30
   7  -6  -3  204.28   14.50
   8  -6   3   81.29   10.10
   8  -6  -3   82.99   10.40
   0   7   3  556.04   24.80
   0  -7  -3  527.55   24.70
   0  -7   3  553.44   24.80
  -1   7   3  156.08   11.70
   1  -7   3  166.48   11.40
   1  -7   3  185.38    8.20
  -1  -7  -3  180.98   10.80
  -1  -7   3  163.38   10.60
   1   7   3  191.78   10.70
  -2   7   3  228.08   14.90
   2  -7   3  209.18   13.30
   2  -7   3  214.58   10.50
  -2  -7  -3  211.78   11.80
  -2  -7   3  205.88   11.80
   2   7   3  215.18   13.40
   2  -7  -3  227.08   13.60
  -3   7   3  193.88   15.30
   3  -7   3  219.08   13.50
   3  -7   3  193.08   10.50
  -3  -7  -3  173.58   10.10
  -3  -7   3  192.98   11.00
   3  -7  -3  184.08   13.10
   4  -7   3   60.89    7.50
  -4   7   3   63.79   11.10
   4  -7   3   47.20    5.60
   4  -7  -3   43.30    7.50
   4  -7  -3   49.30    6.00
  -5   7   3   63.29   12.40
   5  -7   3   48.40    7.80
   5  -7   3   44.70    6.20
   5  -7  -3   56.39    8.00
   5  -7  -3   48.40    6.60
   6  -7   3    9.60    4.50
   6  -7   3    8.10    4.10
   6  -7  -3   14.80    5.00
   6  -7  -3   12.20    5.10
   7  -7   3   42.20    7.30
   7  -7  -3   48.80    9.30
   7  -7  -3   33.30    7.10
   8  -7   3   34.50    7.00
   8  -7  -3   32.90    7.20
   0  -8  -3  102.39    8.80
   0  -8   3   91.59    8.40
   0   8   3   73.79    7.40
   1  -8   3   89.39    8.60
  -1   8   3   85.89    8.50
  -1  -8  -3   92.99    8.00
  -1  -8   3   91.39    8.10
   1  -8  -3  104.69    9.20
  -2   8   3  950.20   42.70
  -2  -8  -3  949.71   39.20
   2  -8   3  935.51   36.90
   2  -8   3 1011.30   41.80
  -2  -8   3  936.01   39.30
   2  -8  -3 1019.50   41.90
   2  -8  -3  940.71   37.80
   3  -8   3  224.88   15.00
  -3   8   3  208.38   16.40
   3  -8   3  235.78   12.10
   3  -8  -3  237.18   12.50
  -3  -8   3  213.58   12.70
   3  -8  -3  242.18   15.40
   4  -8   3   33.80    6.90
  -4   8   3   27.50    8.40
   4  -8   3   45.90    5.50
   4  -8  -3   35.40    5.40
   4  -8  -3   33.00    7.40
  -5   8   3   52.99   11.80
   5  -8   3   67.99    7.30
   5  -8   3   47.00    8.20
   5  -8  -3   62.39    7.30
   5  -8  -3   40.70    7.90
   6  -8   3   35.30    6.60
   6  -8   3   16.50    6.10
   6  -8  -3   20.00    6.70
   6  -8  -3   25.40    5.90
   7  -8   3  134.99   12.00
   7  -8  -3  154.58   13.10
   7  -8  -3  141.89   13.70
   0  -9   3    8.20    4.20
   0  -9  -3    9.90    4.60
   1  -9   3    9.50    4.70
  -1  -9  -3    5.60    3.70
  -1  -9   3    4.30    6.80
   1  -9  -3   20.20    5.60
  -2  -9  -3   99.29    8.40
   2  -9   3   93.09    9.80
  -2   9   3   68.99    9.30
  -2  -9   3   80.99    8.20
   2  -9  -3   84.29    6.50
   2  -9  -3   82.59    9.60
  -3   9   3   54.09    9.60
   3  -9   3   45.70    8.00
   3  -9  -3   61.79    8.80
  -3  -9   3   45.80    6.30
   3  -9  -3   43.40    5.40
   4  -9   3    7.10    4.80
   4  -9   3    9.10    3.40
  -4   9   3    8.60    6.30
   4  -9  -3   10.80    3.80
   4  -9  -3   11.90    5.90
   5  -9   3   37.60    8.30
  -5   9   3   47.00   11.10
   5  -9  -3   31.80    8.00
   5  -9  -3   34.00    6.10
   6  -9   3   37.10    7.00
   6  -9   3   31.80    8.00
   6  -9  -3   42.70    8.80
   6  -9  -3   32.00    6.90
   7  -9   3   36.90    7.50
   7  -9  -3   43.20    9.80
   7  -9  -3   57.29    9.00
   0 -10   3  468.75   24.50
   0 -10  -3  479.65   24.80
  -1 -10  -3   31.70    6.30
   1 -10   3   26.30    6.50
   1 -10  -3   26.30    6.20
  -1 -10   3   29.10    6.40
   2 -10   3  258.37   17.40
  -2 -10  -3  254.77   15.60
   2 -10  -3  276.17   18.20
  -2 -10   3  240.28   15.20
   3 -10   3   41.80    8.60
  -3 -10   3   54.09    6.60
   3 -10  -3   48.20    9.30
   4 -10   3   35.30    8.70
  -4  10   3   58.89   11.00
   4 -10  -3   39.50    8.60
   4 -10  -3   53.39    6.50
   5 -10   3   24.10    7.90
  -5  10   3   24.40    9.40
   5 -10  -3   24.30    5.90
   6 -10   3   11.70    6.60
   6 -10   3    6.30    4.00
   6 -10  -3    2.50    6.00
   6 -10  -3    1.90    4.10
   0 -11  -3   -3.20    3.80
   0 -11   3    0.20    3.70
   1 -11   3  154.38   13.60
  -1 -11  -3  179.68   13.40
  -1 -11   3  157.38   12.90
   1 -11  -3  175.28   14.40
  -2 -11  -3    5.30    4.10
   2 -11  -3   12.90    5.40
  -2 -11   3    6.80    4.60
   3 -11   3    3.90    5.50
   3 -11  -3    9.70    5.80
   4 -11   3   50.29    9.80
   4 -11  -3   33.40    8.80
   5 -11   3   25.50    7.90
   5 -11  -3   26.50    8.90
   6 -11   3   31.40    8.90
   6 -11  -3   22.80    7.80
   0 -12  -3   83.89   10.70
   0 -12   3   81.89   10.70
   1 -12   3  124.09   12.40
  -1 -12  -3  121.59   12.00
  -1 -12   3   83.69   10.00
   1 -12  -3   97.09   11.90
   2 -12   3   52.29   10.00
  -2 -12  -3   62.49    9.10
   2 -12  -3   53.79    9.80
  -2 -12   3   54.89    9.20
   3 -12   3   29.30    8.60
   3 -12  -3   36.30    9.50
   4 -12   3   25.00    8.50
   4 -12  -3   25.10    8.20
   5 -12   3   60.39   11.30
   5 -12  -3   47.20   11.00
   0 -13  -3   16.00    6.80
   0 -13   3   12.80    5.90
  -1 -13  -3   92.49   11.00
   1 -13   3   96.69   12.40
   1 -13  -3   89.49   12.30
  -1 -13   3  116.79   12.20
   2 -13   3   91.79   12.50
  -2 -13   3   92.39   10.50
   3 -13   3   70.29   12.20
   3 -13  -3   57.49   11.60
   4 -13   3    7.60    6.40
   4 -13  -3   13.40    7.90
   0 -14  -3   81.69   11.40
   0 -14   3   81.69   11.20
   1 -14   3   -0.40    5.90
  -1 -14  -3    8.90    5.20
   1 -14  -3   10.30    6.30
  -1 -14   3    0.60    5.10
   2 -14   3    6.50    7.00
  -2 -14   3   14.70    6.50
   2 -14  -3    8.50    7.30
   0   0   4   59.69    3.00
   0   0   4   57.99    3.70
  -1   0   4 9999.00  355.86
   2   0   4  480.15   17.60
  -2   0   4  459.65   21.60
   2   0   4  469.35   18.50
  -2   0   4  457.35   20.10
   2   0  -4  495.75   19.30
   3   0  -4    0.90    1.40
  -3   0   4    1.10    2.20
   3   0   4   -1.40    1.20
   3   0  -4    0.40    1.20
   3   0   4   -0.60    0.70
  -3   0   4   -3.30    2.20
  -4   0   4  506.95   22.90
   4   0   4  503.35   21.10
  -4   0   4  469.65   25.50
   4   0  -4  505.45   21.40
   4   0  -4  511.25   21.50
   5   0  -4  434.06   20.10
   5   0   4  454.45   20.50
   5   0  -4  479.35   21.00
  -5   0   4  477.15   26.40
   6   0   4    2.40    2.90
   6   0  -4    2.80    2.90
   7   0  -4   27.10    5.60
   7   0   4   24.30    5.30
   8   0  -4   -6.30    2.80
   8   0   4   -2.70    3.20
   9   0   4   -0.40    2.70
   9   0  -4   -1.50    3.20
   0  -1  -4  295.57   12.30
   0  -1   4  307.57   12.30
   0  -1   4  305.97   11.40
   0   1   4  300.37   12.90
  -1  -1  -4 1637.34   62.29
   1  -1   4 1769.02   62.79
  -1   1   4 1781.42   64.59
   1  -1   4 1738.53   62.49
  -1   1   4 1729.53   65.59
   1   1   4 1800.92   62.59
   1   1   4 1729.73   62.69
  -1  -1   4 1745.93   63.39
   1  -1  -4 1739.93   63.59
   2  -1   4  140.69    7.10
  -2   1   4  148.59    9.00
  -2   1   4  146.39   10.40
   2  -1   4  162.48    7.00
  -2  -1   4  134.99    9.10
  -2  -1   4  155.38    8.30
   2  -1  -4  164.08    8.20
   2   1   4  154.68    7.00
  -3   1   4  907.31   39.80
   3   1  -4  918.81   35.10
   3  -1   4  954.60   34.50
  -3  -1   4  888.11   38.50
   3  -1  -4  957.00   36.20
   3   1   4  892.51   34.80
   3  -1  -4  924.61   35.80
   4   1  -4  278.87   13.00
   4  -1   4  250.17   12.90
   4  -1   4  283.07   12.00
   4   1  -4  265.57   13.00
  -4   1   4  310.07   18.50
  -4  -1   4  281.27   17.00
   4   1   4  262.97   12.70
  -4  -1   4  276.87   14.60
   4  -1  -4  288.47   13.80
   4  -1  -4  290.57   13.60
  -5   1   4  355.06   23.50
   5   1  -4  404.26   17.90
   5  -1   4  392.26   18.40
   5   1  -4  385.16   18.40
   5  -1  -4  409.96   18.70
  -5  -1   4  416.56   23.60
   5  -1  -4  409.46   18.90
   5   1   4  405.16   18.20
   6  -1   4  576.14   25.90
  -6   1   4  543.35   32.50
   6   1  -4  602.34   26.10
   6  -1  -4  594.94   26.50
   6   1   4  542.55   25.10
   7   1  -4  229.48   13.90
   7  -1   4  260.27   14.80
   7   1   4  216.18   13.50
   7  -1  -4  228.48   14.70
   8   1  -4   14.40    5.00
   8  -1   4   11.20    4.50
   8   1   4    8.00    4.10
   9  -1   4   60.79    8.50
   9   1  -4   50.79    8.50
   9  -1  -4   63.09    9.00
   9   1   4   56.19    8.70
   0  -2   4    0.00    0.70
   0  -2  -4   -1.60    1.50
   0  -2   4    0.40    1.20
   0   2   4   -0.80    1.20
  -1   2   4  179.68   11.20
  -1  -2  -4  190.98    8.20
   1  -2   4  180.08    8.70
   1  -2  -4  203.18    9.30
  -1  -2   4  188.68    8.80
   1   2   4  199.38    8.00
  -1  -2   4  177.98    8.90
  -2  -2  -4  284.97   10.80
  -2   2   4  283.57   15.70
   2  -2   4  283.57   12.40
   2  -2   4  281.17   12.20
   2   2   4  302.37   11.80
   2  -2  -4  287.57   13.40
  -2  -2   4  291.27   13.90
  -2  -2   4  288.97   12.90
   3   2  -4  316.57   13.00
  -3   2   4  283.47   17.50
   3  -2   4  316.97   13.30
   3  -2  -4  292.97   14.40
  -3  -2   4  285.07   15.50
  -3  -2   4  295.57   14.20
   3   2   4  300.87   12.80
   4  -2   4  197.98   11.00
   4   2  -4  217.88   10.70
  -4   2   4  217.58   15.90
   4  -2   4  219.98   10.60
  -4  -2   4  225.88   14.20
  -4  -2   4  229.18   12.20
   4  -2  -4  202.48   11.60
   4   2   4  209.38   10.30
   4  -2  -4  214.38   11.20
   5  -2   4  360.96   16.30
  -5   2   4  377.96   23.90
   5   2  -4  361.06   16.70
   5  -2   4  374.86   17.90
   5   2  -4  353.06   17.10
   5  -2  -4  378.06   18.20
   5  -2  -4  374.56   18.00
   5   2   4  384.96   16.90
   6   2  -4  113.89    8.60
   6  -2   4   99.99    8.80
  -6   2   4  119.69   14.20
   6   2   4  121.29    8.10
   6  -2  -4  112.59    9.30
   6  -2  -4  129.19    9.10
   7   2  -4    8.50    3.70
   7   2   4   10.80    3.60
   7  -2  -4   11.10    4.10
   8   2  -4  245.58   15.60
   8  -2   4  296.47   17.20
   8   2   4  254.87   15.20
   8  -2  -4  247.68   16.70
   9  -2   4   17.60    5.80
   9   2  -4    5.80    4.30
   9   2   4    9.70    4.40
   9  -2  -4   11.50    5.60
   0  -3   4    6.40    2.10
   0   3   4    5.80    2.60
   0  -3  -4    7.80    2.30
   0  -3   4    5.60    0.90
  -1   3   4 1092.79   44.80
  -1  -3  -4 1109.99   41.30
   1  -3   4 1161.98   40.70
   1  -3   4 1133.29   42.20
  -1  -3   4 1112.89   41.80
  -1  -3   4 1061.29   40.60
   1  -3  -4 1114.99   42.80
   1   3   4 1132.29   40.60
   2   3  -4  429.46   16.50
  -2   3   4  417.06   21.70
  -2  -3  -4  461.75   16.80
   2  -3   4  420.06   18.40
   2  -3   4  417.76   17.50
  -2  -3   4  436.66   18.20
   2  -3  -4  417.46   19.10
  -2  -3   4  431.36   18.10
   2   3   4  446.96   17.00
   3  -3   4  901.61   35.80
   3   3  -4  958.40   34.50
  -3   3   4  881.71   40.50
  -3  -3   4  888.41   35.70
  -3  -3   4  971.50   37.30
   3   3   4  902.81   34.40
   3  -3  -4  893.71   36.80
  -4   3   4  338.07   21.50
   4  -3   4  365.66   16.80
   4  -3   4  381.06   16.70
  -4  -3   4  379.76   17.30
   4  -3  -4  362.66   17.00
   4  -3  -4  347.17   17.50
  -5   3   4  242.68   18.90
   5  -3   4  229.58   12.90
   5  -3   4  216.98   11.90
   5   3  -4  233.98   11.90
   5  -3  -4  240.18   13.30
   5   3   4  229.48   11.40
   5  -3  -4  212.58   13.00
  -6   3   4  310.07   23.80
   6   3  -4  363.56   16.90
   6  -3   4  344.27   17.90
   6   3   4  317.77   16.00
   6  -3  -4  340.57   17.80
   6  -3  -4  318.57   17.80
   7   3  -4    1.80    2.80
   7  -3   4    1.30    2.60
   7  -3  -4    2.70    3.80
   7   3   4   -0.50    2.40
   8   3  -4   75.69    8.00
   8  -3   4   83.29    9.20
   8  -3  -4   84.19    9.70
   8   3   4   76.99    7.60
   9  -3   4   32.40    7.40
   9  -3  -4   34.90    8.00
   9   3   4   36.00    6.30
   0   4   4    3.70    3.10
   0  -4   4    9.30    1.00
   0  -4   4   14.20    2.90
   0  -4  -4   12.50    2.80
  -1   4   4 1066.99   43.30
   1  -4   4 1081.59   38.60
  -1  -4  -4 1055.79   39.90
   1  -4   4 1027.00   40.60
  -1  -4   4 1025.20   40.20
   2  -4   4  740.53   28.70
   2   4  -4  760.32   27.20
  -2  -4  -4  737.73   28.40
   2  -4   4  767.22   30.40
  -2   4   4  740.53   33.70
   2  -4  -4  724.33   30.80
   2   4   4  759.42   28.10
  -2  -4   4  728.23   29.40
   3  -4   4   95.39    6.20
   3   4  -4   89.69    5.00
   3  -4   4   92.19    6.90
  -3   4   4   81.99    9.80
  -3  -4  -4  100.69    4.70
  -3  -4   4   90.49    6.20
   3  -4  -4  100.39    7.80
   3   4   4   91.79    5.20
   4  -4   4    9.00    2.90
   4   4  -4   10.70    2.20
   4  -4   4   13.70    3.50
  -4   4   4   14.60    5.40
   4  -4  -4   19.40    4.40
   4   4   4    8.00    2.00
  -4  -4   4    9.70    3.10
   5   4  -4  189.78   10.30
   5  -4   4  206.28   12.10
   5  -4   4  185.38   11.40
  -5   4   4  210.58   18.00
   5   4   4  194.28   10.10
   5  -4  -4  199.58   12.20
   5  -4  -4  225.68   13.20
  -6   4   4   26.70    8.60
   6  -4   4   28.60    5.60
   6   4  -4   24.80    4.30
   6  -4  -4   39.30    5.50
   6  -4  -4   30.70    6.20
   6   4   4   33.90    4.20
   7  -4   4   53.19    7.40
   7  -4  -4   51.19    7.00
   7   4   4   54.29    5.90
   8   4   4   81.09    7.70
   8  -4  -4  101.39   10.00
   9  -4   4   19.90    6.20
   9  -4  -4    9.00    5.70
   0  -5   4    6.90    0.90
   0  -5   4    9.70    2.70
   0  -5  -4    6.80    2.60
   0   5   4   12.10    3.60
  -1   5   4  954.80   39.60
  -1  -5  -4  952.70   36.40
   1  -5   4  902.01   37.10
   1  -5  -4  933.61   37.70
  -1  -5   4  883.11   36.40
   1   5   4  959.20   35.80
  -2  -5  -4  134.49    7.50
  -2   5   4  130.99   11.10
   2  -5   4  127.89    7.00
   2  -5   4  124.59    8.50
  -2  -5   4  135.89    8.00
   2  -5  -4  135.59    9.30
   2   5   4  138.79    6.30
   3   5  -4  563.94   20.80
  -3   5   4  564.44   28.90
   3  -5   4  544.75   24.40
   3  -5   4  525.65   22.80
  -3  -5  -4  569.84   21.70
  -3  -5   4  560.04   23.30
   3  -5  -4  520.35   24.90
   3   5   4  544.35   21.60
   4   5  -4  217.18   10.10
   4  -5   4  234.88   12.30
   4  -5   4  210.78   13.00
  -4   5   4  261.47   18.60
   4  -5  -4  246.78   12.80
   4   5   4  228.68   10.70
  -4  -5   4  215.28   12.00
   4  -5  -4  218.38   13.80
   5  -5   4  413.96   20.80
  -5   5   4  508.95   29.70
   5  -5   4  453.25   21.80
   5   5   4  425.16   18.90
   5  -5  -4  482.05   22.10
   5  -5  -4  442.76   22.50
   6  -5   4   91.29    8.70
  -6   5   4   86.99   12.30
   6   5   4   94.89    6.90
   6  -5  -4   84.49    8.20
   6  -5  -4  104.89    9.50
   7  -5   4   34.50    6.60
   7   5   4   18.30    4.00
   7  -5  -4   31.90    6.30
   8  -5   4   92.09   10.10
   8  -5  -4   79.19   10.00
   0   6   4   -0.60    1.70
   0  -6  -4    5.50    2.80
   0  -6   4    1.10    2.20
   0  -6   4    1.80    0.60
  -1   6   4  360.36   18.90
   1  -6   4  335.77   17.00
  -1  -6  -4  361.86   16.50
   1   6   4  331.17   16.50
  -1  -6   4  328.77   16.20
   1  -6  -4  352.96   17.30
  -2  -6  -4  252.77   12.40
   2  -6   4  238.88   14.00
  -2   6   4  251.47   16.30
   2  -6   4  263.07   11.70
   2  -6  -4  254.17   14.50
  -2  -6   4  238.88   12.60
   2   6   4  256.87   10.50
  -3   6   4  444.76   26.40
   3  -6   4  485.45   23.10
  -3  -6  -4  523.55   20.60
   3  -6   4  507.05   21.20
  -3  -6   4  487.45   21.50
   3  -6  -4  518.25   24.20
   3   6   4  474.95   19.50
  -4   6   4  199.48   16.50
   4  -6   4  166.48   11.60
   4  -6   4  173.08   10.20
   4   6   4  149.59    8.20
   4  -6  -4  164.48   10.40
  -4  -6   4  141.29    9.60
   4  -6  -4  177.48   12.30
   5  -6   4   88.29    7.60
  -5   6   4   86.09   11.70
   5  -6   4   75.39    7.80
   5   6   4   61.79    5.20
   5  -6  -4   63.99    8.00
   5  -6  -4   75.89    7.60
   6  -6   4  114.59   10.40
  -6   6   4  108.59   15.30
   6  -6   4  104.99    9.30
   6  -6  -4  100.59    9.50
   6  -6  -4  100.19   10.80
   7  -6   4   37.50    7.00
   7  -6  -4   58.89   13.80
   7  -6  -4   43.90    8.00
   8  -6   4   10.10    5.60
   8  -6  -4   19.00    6.20
   0  -7  -4   -1.10    2.30
   0  -7   4   -3.30    2.00
   0   7   4    1.80    2.70
  -1   7   4  275.77   16.10
  -1  -7  -4  248.28   14.00
   1  -7   4  286.37   15.30
  -1  -7   4  261.47   14.10
   1   7   4  265.37   14.50
   1  -7  -4  262.27   15.10
   2  -7   4   27.10    5.40
  -2  -7  -4   21.50    4.00
   2  -7   4   25.90    3.30
  -2   7   4   18.40    5.40
   2   7   4   22.10    3.20
  -2  -7   4   28.40    4.70
   2  -7  -4   20.20    5.00
  -3   7   4  327.57   21.00
   3  -7   4  337.77   15.20
   3  -7   4  323.37   17.90
  -3  -7  -4  305.47   16.00
   3  -7  -4  336.57   18.50
  -3  -7   4  299.27   15.70
   4  -7   4   43.80    7.10
  -4   7   4   49.70   10.20
   4  -7   4   52.89    5.70
   4  -7  -4   43.20    5.70
   4  -7  -4   49.40    7.30
   5  -7   4  134.59   11.70
  -5   7   4  163.08   17.10
   5  -7   4  132.49   10.00
   5  -7  -4  141.49   10.60
   5  -7  -4  146.49   12.50
  -6   7   4    2.30    5.50
   6  -7   4    9.00    4.30
   6  -7   4   -2.70    3.20
   6  -7  -4    3.00    3.80
   6  -7  -4    1.60    4.40
   7  -7   4  131.59   11.60
   7  -7  -4  155.68   13.30
   7  -7  -4  133.79   12.10
   8  -7   4    9.20    4.50
   8  -7  -4   12.90    6.30
   0  -8  -4   43.40    6.80
   0   8   4   44.40    6.20
   0  -8   4   48.10    6.20
   1  -8   4  584.74   27.00
  -1  -8  -4  582.24   26.00
  -1   8   4  528.65   27.20
   1  -8  -4  582.54   27.20
  -1  -8   4  562.94   25.90
   2  -8   4  106.09    9.20
   2  -8   4  108.89    6.60
  -2  -8  -4   95.09    8.10
   2  -8  -4  104.99   10.00
  -2  -8   4  105.49    8.70
   3  -8   4  273.97   16.70
   3  -8   4  264.07   13.10
  -3   8   4  290.37   19.70
  -3  -8   4  251.67   14.20
   3  -8  -4  255.57   16.70
   3  -8  -4  241.38   13.60
  -4   8   4  104.99   13.40
   4  -8   4  125.19    8.70
   4  -8   4  111.49   10.90
   4  -8  -4  128.99   11.90
   4  -8  -4  111.99    9.00
   5  -8   4    4.20    3.20
   5  -8   4    9.60    4.90
  -5   8   4    0.60    6.00
   5  -8  -4    8.40    5.30
   6  -8   4  112.59   11.80
  -6   8   4  153.38   18.40
   6  -8   4  109.09   10.20
   6  -8  -4  139.79   11.40
   6  -8  -4  144.69   13.00
   7  -8   4   52.49    8.00
   7  -8  -4   50.39    8.50
   7  -8  -4   54.69   10.10
   0  -9   4   -2.60    2.70
   0  -9  -4    4.10    3.70
   1  -9   4   28.10    6.30
  -1  -9   4   12.90    4.90
   1  -9  -4   15.30    5.40
  -2   9   4  183.78   15.30
  -2  -9  -4  215.48   13.20
   2  -9   4  217.38   14.90
   2  -9  -4  221.48   14.90
  -2  -9   4  222.78   13.60
   2  -9  -4  223.68   11.90
  -3   9   4  111.49   12.50
   3  -9   4  135.69   11.90
  -3  -9   4  116.39    9.50
   3  -9  -4  140.09   12.10
   4  -9   4  196.98   12.20
  -4   9   4  195.28   17.80
   4  -9   4  217.68   15.80
   4  -9  -4  224.18   13.30
   4  -9  -4  233.18   16.40
   5  -9   4   26.70    5.90
   5  -9   4   46.70    8.90
  -5   9   4   12.90    8.10
   5  -9  -4   23.00    7.20
   5  -9  -4   27.30    5.80
   6  -9   4  234.98   14.80
   6  -9   4  193.88   15.90
  -6   9   4  195.08   21.30
   6  -9  -4  212.18   17.50
   6  -9  -4  231.38   15.50
   7  -9   4    2.30    4.30
   7  -9  -4    3.80    5.20
   7  -9  -4   -3.70    6.00
   0 -10   4    5.90    4.10
   0 -10  -4   14.30    5.50
   1 -10   4  122.59   11.70
  -1 -10  -4  140.49   11.20
   1 -10  -4  151.38   12.70
  -1 -10   4  126.79   10.80
  -2 -10  -4   43.00    6.90
  -2 -10   4   55.99    7.30
   2 -10  -4   71.19    9.70
  -3  10   4  171.48   15.50
   3 -10   4  199.88   15.20
  -3 -10   4  174.48   12.50
   3 -10  -4  203.88   16.00
  -4  10   4   24.50    8.60
   4 -10   4   30.80    7.90
   4 -10  -4   26.80    5.60
   4 -10  -4   21.90    7.50
   5 -10   4   90.39   11.00
  -5  10   4   54.29   12.40
   5 -10  -4   78.09   11.40
   6 -10   4  214.58   17.80
   6 -10  -4  276.17   17.30
   6 -10  -4  263.67   20.20
   0 -11  -4    1.20    4.00
   0 -11   4    9.90    4.70
  -1 -11  -4   46.90    8.10
   1 -11   4   62.59    8.90
  -1 -11   4   51.89    7.90
   1 -11  -4   37.50    7.90
  -2 -11  -4   11.30    4.60
   2 -11   4   10.40    4.80
   2 -11  -4    3.30    4.10
  -2 -11   4    7.30    4.80
   3 -11   4  114.79   12.40
  -3 -11   4  100.89   10.00
   3 -11  -4  129.89   13.40
   4 -11   4   53.29   10.10
   4 -11  -4   52.09   10.40
   5 -11   4   -1.30    4.90
   5 -11  -4    5.50    6.00
   6 -11   4   56.69   11.20
   6 -11  -4   36.00   10.40
   0 -12  -4   24.80    7.30
   0 -12   4   12.90    5.90
  -1 -12  -4  152.88   13.00
   1 -12   4  138.59   13.80
   1 -12  -4  168.18   14.80
  -1 -12   4  164.78   13.50
   2 -12   4   26.90    7.90
   2 -12  -4   30.50    8.40
   3 -12   4  252.17   19.10
   3 -12  -4  228.78   19.20
   4 -12   4   25.80    8.40
   4 -12  -4   14.90    7.50
   5 -12   4   39.10    9.80
   5 -12  -4   41.90   11.00
   0 -13   4  107.29   12.10
   0 -13  -4  100.99   11.90
  -1 -13  -4   51.09    9.80
   1 -13   4   44.50    9.80
   1 -13  -4   39.60    9.10
  -1 -13   4   45.20    8.90
   2 -13   4  106.89   13.30
   2 -13  -4   90.09   12.90
  -2 -13   4  114.89   12.20
   3 -13   4  107.69   13.00
   3 -13  -4   67.49   12.20
   4 -13   4   16.10    7.80
   4 -13  -4   12.40    7.70
   0 -14   4   19.20    7.70
   0 -14  -4   17.00    7.40
   1 -14   4  119.49   14.00
  -1 -14  -4  113.89   12.40
   1 -14  -4  100.29   13.50
  -1 -14   4  132.19   13.40
   2 -14   4   14.60    7.80
   2 -14  -4   26.40    9.40
  -2 -14   4   21.70    6.80
   0   0   5    0.70    1.60
  -1   0   5   79.09    6.80
  -1   0   5   89.99    5.80
   1   0   5   81.39    4.20
   1   0   5   79.69    4.30
  -2   0   5   67.49    5.80
   2   0   5   71.79    4.10
  -2   0   5   67.79    7.10
   2   0   5   70.79    3.60
   3   0   5  872.01   33.90
   3   0   5  906.91   32.40
   3   0  -5  869.81   34.80
  -3   0   5  907.11   38.60
  -3   0   5  902.71   36.60
   4   0   5    3.10    1.60
  -4   0   5    2.70    4.10
  -4   0   5    6.90    3.00
   4   0  -5    2.60    2.00
   5   0  -5    5.30    2.40
   5   0  -5    7.90    2.60
   5   0   5    7.10    2.80
  -5   0   5    9.50    4.70
   6   0   5    6.90    3.30
   6   0  -5    1.00    2.70
  -6   0   5    2.70    4.30
   7   0  -5  137.59   10.80
   7   0   5  150.88   10.30
   8   0   5   18.70    5.30
   9   0  -5   72.99    9.20
   9   0   5   93.99    9.60
   0  -1   5  253.27   10.50
   0  -1   5  241.28    9.50
   0  -1  -5  235.88   10.30
   0   1   5  239.98   11.10
  -1   1   5 4054.19  145.89
   1  -1   5 4174.08  143.99
  -1   1   5 3970.30  147.19
   1  -1   5 3991.90  143.49
   1  -1  -5 4058.19  144.89
  -1  -1   5 3977.90  144.69
   1   1   5 4161.88  143.69
   1   1   5 3992.60  143.99
  -1  -1   5 3945.81  145.79
   2  -1   5  380.76   15.80
  -2   1   5  403.76   18.30
  -2   1   5  411.16   20.00
   2  -1   5  401.26   15.70
   2   1   5  379.86   14.90
   2   1   5  404.46   15.70
  -2  -1   5  395.96   17.30
   2  -1  -5  406.26   17.10
  -2  -1   5  383.76   18.40
  -3   1   5  522.15   26.30
   3  -1   5  570.84   21.20
  -3   1   5  532.35   24.20
   3  -1   5  532.05   21.90
   3   1  -5  563.74   22.10
   3   1   5  540.65   21.60
  -3  -1   5  559.54   25.60
  -3  -1   5  528.05   23.50
   3  -1  -5  532.45   22.80
   4  -1   5   23.30    2.50
  -4   1   5   10.40    4.90
   4  -1   5   20.40    2.90
   4   1  -5   21.20    3.20
   4   1  -5   24.90    3.40
   4   1   5   22.60    3.10
  -4  -1   5   15.30    5.10
   4  -1  -5   15.20    3.20
   4  -1  -5   20.20    3.80
  -4  -1   5   27.00    4.90
  -5   1   5  104.99   11.50
   5   1  -5  119.59    8.10
   5  -1   5  119.49    7.90
   5   1  -5  108.29    7.60
   5   1   5  121.19    7.70
  -5  -1   5  122.59   12.00
   5  -1  -5  110.59    8.00
   5  -1  -5  104.89    8.00
  -5  -1   5  125.39    9.70
  -6   1   5  330.87   23.10
   6  -1   5  310.77   16.30
   6   1  -5  305.17   16.20
   6  -1  -5  318.77   16.80
   6   1   5  327.37   16.00
   6  -1  -5  277.17   15.80
   7  -1   5   29.50    5.50
   7   1  -5   25.50    5.40
   7   1   5   23.30    5.00
   7  -1  -5   38.60    6.60
   8  -1   5  108.09   10.20
   8   1  -5  119.69   10.50
   8  -1  -5  130.09   11.30
   8   1   5  121.29   10.10
   9   1  -5   17.40    5.40
   9  -1   5   18.60    5.70
   9  -1  -5   22.60    6.40
   9   1   5   16.00    5.10
   0  -2  -5 5915.41  210.98
   0  -2   5 6065.09  210.98
   0   2   5 5782.12  211.08
   1  -2   5  240.58   10.60
  -1   2   5  243.18   13.40
   1  -2   5  239.08    9.70
   1   2   5  238.08    9.80
   1  -2  -5  233.58   11.20
  -1  -2   5  241.08   11.00
  -1  -2   5  226.08   11.10
  -2  -2  -5  902.81   32.70
   2  -2   5  946.91   34.30
   2  -2   5  860.81   33.80
  -2   2   5  834.22   38.20
  -2  -2   5  900.41   35.90
   2   2   5  907.01   33.60
   2  -2  -5  908.01   35.40
  -2  -2   5  937.61   35.00
   3   2  -5  639.94   24.40
  -3   2   5  581.84   29.60
   3  -2   5  613.54   24.80
   3  -2   5  628.74   24.70
   3   2   5  621.44   24.20
   3  -2  -5  603.94   26.10
  -3  -2   5  632.44   27.70
  -3  -2   5  646.34   26.30
   4   2  -5   56.69    4.50
   4  -2   5   51.29    4.80
   4  -2   5   55.39    4.40
  -4   2   5   46.00    8.80
   4  -2  -5   50.59    5.40
  -4  -2   5   44.90    7.30
  -4  -2   5   56.09    6.10
   4   2   5   44.90    4.10
   4  -2  -5   39.50    4.70
  -5   2   5  101.49   12.10
   5  -2   5   93.29    7.00
   5   2  -5   90.09    6.80
  -5  -2   5   79.09    8.20
   5  -2  -5   91.29    7.60
  -5  -2   5   99.59   10.40
   5   2   5   94.39    6.60
   5  -2  -5   87.49    7.50
   6   2  -5  378.56   18.70
  -6   2   5  408.46   26.20
   6  -2   5  383.16   19.20
   6  -2  -5  389.06   19.60
   6   2   5  410.96   18.40
   6  -2  -5  347.87   18.90
   7  -2   5   27.10    5.70
   7   2  -5   25.20    5.00
   7   2   5   22.40    4.60
   7  -2  -5   30.50    6.20
   8  -2   5   18.10    4.80
   8  -2  -5   14.70    5.50
   9   2  -5   36.90    6.70
   9  -2  -5   37.20    7.60
   9   2   5   27.90    6.10
   0  -3   5 1402.46   52.19
   0  -3   5 1403.76   50.19
   0  -3  -5 1402.76   52.29
   0   3   5 1399.06   53.59
  -1   3   5  285.47   16.30
   1  -3   5  321.17   14.10
  -1  -3  -5  313.17   13.30
   1  -3   5  331.07   12.60
   1  -3  -5  296.37   14.30
  -1  -3   5  315.97   13.20
  -1  -3   5  321.87   13.90
   1   3   5  315.97   12.60
  -2   3   5   36.70    6.20
   2  -3   5   32.00    3.60
  -2  -3  -5   29.80    2.50
  -2  -3   5   30.50    4.10
   2  -3  -5   33.40    4.30
  -2  -3   5   30.60    3.50
   3  -3   5  187.78    9.70
  -3   3   5  169.38   13.80
   3   3  -5  183.38    8.50
   3  -3   5  176.08    9.30
   3   3   5  183.18    8.70
  -3  -3   5  193.68   10.20
   3  -3  -5  175.98   10.60
  -3  -3   5  171.58   10.90
   4  -3   5  192.28   10.50
   4  -3   5  195.38   10.70
  -4   3   5  190.38   15.10
   4   3  -5  195.68    9.80
  -4  -3   5  190.68   12.90
   4  -3  -5  220.08   12.30
   4   3   5  187.98    9.50
  -4  -3   5  202.38   11.50
   5   3  -5   90.69    6.70
   5   3  -5   92.99    6.80
  -5   3   5   91.19   11.50
   5  -3   5  105.49    7.20
   5  -3   5  100.39    7.70
   5  -3  -5   86.39    7.30
   5   3   5   83.59    6.10
   5  -3  -5   78.09    7.50
   6  -3   5   95.99    8.30
  -6   3   5   83.39   11.90
   6   3  -5   93.59    7.40
   6  -3  -5   91.39    8.60
   6  -3  -5   86.19    8.30
   6   3   5   80.09    6.70
   7  -3   5    8.60    4.40
   7   3  -5   15.00    4.20
  -7   3   5   24.10    9.90
   7   3   5   12.00    3.60
   7  -3  -5   15.30    5.20
   8   3  -5  101.29    9.20
   8  -3   5  100.29   10.00
   8   3   5   93.69    8.40
   8  -3  -5   96.99   10.40
   9  -3   5    1.00    4.20
   9  -3  -5    7.00    4.60
   9   3   5    2.70    3.40
   0   4   5  152.58   10.30
   0  -4   5  181.38    9.30
   0  -4   5  169.28    6.70
  -1   4   5  288.77   16.60
   1  -4   5  271.77   13.80
   1  -4   5  316.47   12.10
  -1  -4  -5  308.57   13.50
   1  -4  -5  283.17   14.30
   1   4   5  311.97   12.10
  -1  -4   5  298.77   11.60
   2  -4   5  157.08    7.50
   2  -4   5  156.08    8.80
  -2  -4  -5  141.99    7.10
  -2   4   5  123.59   11.10
   2   4  -5  148.49    6.10
   2   4   5  131.59    6.80
  -2  -4   5  144.99    7.40
  -2  -4   5  132.39    8.00
   2  -4  -5  142.99    9.20
   3   4  -5   86.29    4.80
   3  -4   5   90.89    6.70
  -3  -4  -5   87.69    4.40
  -3   4   5   89.59    9.50
   3  -4   5   89.29    6.00
  -3  -4   5   81.69    6.00
   3   4   5   84.09    5.10
   3  -4  -5   77.29    7.10
   4   4  -5  385.26   16.10
   4  -4   5  376.86   17.50
   4  -4   5  377.96   18.00
  -4   4   5  410.46   23.90
   4  -4  -5  359.36   17.70
  -4  -4   5  355.96   17.70
   4   4   5  365.96   16.10
   4  -4  -5  413.66   19.50
   5  -4   5   30.80    5.40
   5  -4   5   39.90    5.40
   5   4  -5   47.20    4.40
  -5   4   5   46.50   10.30
   5  -4  -5   46.70    6.20
   5   4   5   40.30    4.10
   5  -4  -5   39.30    5.10
  -6   4   5    0.00    5.80
   6  -4   5   -0.70    3.00
   6   4  -5    3.40    2.30
   6   4   5    2.30    2.20
   7  -4   5  127.59   10.80
  -7   4   5  153.58   18.10
   7   4   5  138.49    9.20
   7  -4  -5  124.99   11.20
   8  -4   5   30.70    6.90
   8   4   5   39.60    6.00
   8  -4  -5   27.30    6.80
   0  -5   5    0.70    2.00
   0  -5   5    4.20    0.80
   0   5   5    4.40    3.30
   0  -5  -5    9.50    2.90
  -1  -5  -5  795.02   31.60
  -1   5   5  833.22   35.40
   1  -5   5  753.42   32.20
  -1  -5   5  755.92   31.80
   1  -5  -5  782.22   32.90
   1   5   5  847.42   31.10
  -2   5   5   49.00    7.40
   2  -5   5   43.80    5.10
  -2  -5  -5   43.80    4.10
   2  -5   5   46.40    3.70
   2  -5  -5   38.00    4.80
  -2  -5   5   45.00    4.50
   2   5   5   45.60    3.10
  -3  -5  -5  284.87   12.00
   3  -5   5  269.47   13.00
   3  -5   5  285.87   14.80
   3   5  -5  291.37   11.20
  -3   5   5  258.37   17.90
   3  -5  -5  254.67   15.00
  -3  -5   5  260.57   13.50
   4   5  -5   92.19    5.40
   4  -5   5  105.49    7.10
  -4   5   5   91.39   12.10
   4  -5   5   97.99    8.30
  -4  -5   5   80.99    7.10
   4  -5  -5   84.59    8.40
   4  -5  -5  110.79    8.00
   4   5   5   85.89    5.70
   5  -5   5   -0.20    1.90
   5  -5   5   -2.90    2.60
  -5   5   5    5.30    5.10
   5   5   5    3.10    1.90
   5  -5  -5    4.20    3.10
   5  -5  -5    1.90    3.50
   6  -5   5   46.30    6.40
  -6   5   5   40.10   10.70
   6  -5  -5   41.20    6.80
   6  -5  -5   36.70    7.10
   6   5   5   43.30    4.70
   7  -5   5    1.60    3.70
  -7   5   5    4.00    6.10
   7   5   5   -1.20    2.20
   7  -5  -5    1.90    4.00
   8  -5   5  105.59   10.70
   8  -5  -5  106.29   11.10
   0  -6  -5   14.00    3.50
   0  -6   5   13.60    1.20
   0  -6   5   11.70    3.40
   0   6   5    9.40    3.60
   1  -6   5  304.97   11.80
  -1  -6  -5  288.87   14.20
  -1   6   5  272.07   16.90
   1  -6   5  287.07   15.00
  -1  -6   5  268.67   14.20
   1  -6  -5  279.57   15.00
   1   6   5  275.97   14.60
  -2   6   5   99.79   10.30
   2  -6   5  119.19    8.70
   2  -6   5  108.89    6.20
  -2  -6  -5  108.29    7.00
  -2  -6   5  102.69    7.40
   2   6   5  105.89    5.40
   2  -6  -5  107.99    9.00
  -3   6   5   40.20    8.60
   3  -6   5   36.80    5.90
  -3  -6  -5   37.90    4.00
   3  -6   5   38.40    4.10
   3   6   5   31.20    3.00
   3  -6  -5   27.80    5.80
  -3  -6   5   36.00    4.70
  -4   6   5  132.99   14.20
   4  -6   5  128.69    9.90
   4  -6   5  119.49    8.30
   4   6   5  111.69    6.70
   4  -6  -5  130.69   10.60
   4  -6  -5  117.99    8.80
  -4  -6   5  116.89    8.50
  -5   6   5  141.99   16.20
   5  -6   5  148.39   11.20
   5  -6   5  145.29   10.20
   5  -6  -5  172.38   12.70
   5   6   5  138.99    8.30
   5  -6  -5  153.78   10.90
  -6   6   5   -2.10    6.20
   6  -6   5    8.70    4.40
   6  -6   5    4.50    3.70
   6  -6  -5    4.10    4.30
   6  -6  -5    2.30    3.40
  -7   6   5   68.59   15.40
   7  -6   5   27.60    6.40
   7  -6  -5   37.60    7.60
   7  -6  -5   47.70    8.50
   8  -6   5    6.30    5.00
   8  -6  -5    3.40    5.00
   0  -7   5  175.28   11.10
   0  -7  -5  174.38   11.20
   0   7   5  164.48   11.80
   1  -7   5  348.17   13.50
   1  -7   5  318.47   17.20
  -1  -7  -5  320.17   16.40
  -1  -7   5  345.27   16.90
   1   7   5  296.47   16.90
   1  -7  -5  336.07   17.70
   2  -7   5  207.38   12.90
   2  -7   5  200.68    9.70
  -2   7   5  194.48   14.90
  -2  -7  -5  200.58   11.20
   2  -7  -5  197.88   13.00
   2   7   5  188.68   10.10
  -2  -7   5  194.68   11.30
  -3   7   5  399.26   24.00
   3  -7   5  391.46   17.30
   3  -7   5  408.66   20.40
   3  -7  -5  399.06   20.80
   3   7   5  359.26   15.50
  -3  -7   5  356.36   18.00
   3  -7  -5  399.76   18.60
  -4   7   5   78.59   11.50
   4  -7   5   67.09    6.40
   4  -7   5   90.79    8.90
  -4  -7   5   79.39    7.20
   4  -7  -5   75.39    8.80
   4  -7  -5   67.89    6.90
  -5   7   5  116.79   14.90
   5  -7   5   78.79    9.40
   5  -7   5   96.89    8.30
   5  -7  -5   98.49   10.50
   5  -7  -5  104.29    9.10
   6  -7   5   41.00    7.20
   6  -7   5   51.29    6.90
  -6   7   5   47.50   11.60
   6  -7  -5   47.10    9.50
   6  -7  -5   54.79    7.50
   7  -7   5   38.90    7.30
  -7   7   5   25.70   10.00
   7  -7  -5   44.60    9.00
   7  -7  -5   49.99    7.40
   8  -7   5    3.50    4.90
   8  -7  -5    8.10    5.40
   0  -8  -5  687.33   31.00
   0  -8   5  711.93   31.30
   1  -8   5  198.58   13.30
   1  -8  -5  226.68   14.20
  -1  -8   5  202.38   12.80
   2  -8   5  254.87   14.80
  -2   8   5  216.78   16.50
   2  -8   5  225.68   11.40
  -2  -8  -5  219.38   12.80
  -2  -8   5  215.68   13.20
   2  -8  -5  256.97   15.80
  -3   8   5   11.00    6.40
   3  -8   5   14.00    3.30
   3  -8   5   12.90    4.80
   3  -8  -5    9.40    3.30
   3  -8  -5   13.90    5.40
  -3  -8   5   12.70    4.30
   4  -8   5  223.78   14.80
  -4   8   5  240.38   19.20
   4  -8   5  193.68   11.60
   4  -8  -5  214.58   15.60
   4  -8  -5  175.58   12.00
   5  -8   5   67.39    7.10
  -5   8   5   97.49   15.50
   5  -8   5   59.79    8.10
   5  -8  -5   59.99    9.10
   5  -8  -5   59.19    7.50
  -6   8   5    7.00    7.80
   6  -8   5   -1.10    3.70
   6  -8   5   -4.10    2.80
   6  -8  -5    7.80    4.40
   6  -8  -5    0.40    4.50
   7  -8   5  138.79   11.70
   7  -8  -5  129.19   12.20
   7  -8  -5  124.79   13.10
   0  -9  -5    7.10    5.90
   0  -9   5    8.30    4.20
   1  -9   5   77.99    8.40
  -1   9   5   54.89    8.20
  -1  -9  -5   69.19    7.70
  -1  -9   5   64.39    7.50
   1  -9  -5   72.89    8.60
   2  -9   5  174.18   13.00
  -2   9   5  133.09   12.80
  -2  -9  -5  171.58   11.20
   2  -9  -5  146.89   12.80
  -2  -9   5  163.28   11.70
  -3   9   5    9.40    5.60
   3  -9   5   10.70    5.40
   3  -9  -5   12.50    5.00
  -3  -9   5   13.70    4.20
   3  -9  -5   22.00    4.50
   4  -9   5    5.10    4.70
   4  -9   5    4.10    3.10
  -4   9   5    7.70    6.20
   4  -9  -5   10.20    4.00
   4  -9  -5    6.40    5.20
   5  -9   5    1.80    4.60
   5  -9   5   -0.60    2.90
  -5   9   5    0.30    5.70
   5  -9  -5    7.50    5.40
   5  -9  -5   -0.50    3.50
   6  -9   5  101.99    9.50
  -6   9   5  128.69   17.60
   6  -9   5   82.79   10.80
   6  -9  -5  108.19   10.40
   6  -9  -5  107.39   12.40
   7  -9   5   13.30    5.20
   7  -9  -5   -0.40    6.40
   7  -9  -5   14.70    5.90
   0 -10   5   86.39    9.50
   0 -10  -5  103.79   10.10
  -1 -10  -5   36.70    6.90
   1 -10   5   28.00    6.70
   1 -10  -5   40.00    7.80
  -1 -10   5   30.40    6.60
  -2 -10  -5  814.72   36.50
   2 -10   5  865.31   39.40
   2 -10  -5  823.62   39.40
  -2 -10   5  847.72   37.30
  -3  10   5   59.29   10.90
   3 -10  -5   59.39    7.60
   3 -10  -5   53.39    9.40
  -3 -10   5   47.70    6.80
   4 -10   5   75.89   10.20
  -4  10   5   91.19   13.00
   4 -10  -5   95.09    8.50
   4 -10  -5   63.89   10.80
  -5  10   5   30.70    9.70
   5 -10   5   26.50    7.60
   5 -10  -5   38.80    6.80
   5 -10  -5   35.10    9.30
  -6  10   5  160.58   19.60
   6 -10   5  136.99   13.60
   6 -10  -5  139.19   12.20
   6 -10  -5  142.79   15.10
   0 -11   5  113.89   11.30
   0 -11  -5  130.39   12.10
   1 -11   5  262.17   18.20
  -1 -11  -5  282.57   17.40
   1 -11  -5  292.47   18.90
  -1 -11   5  252.27   17.10
  -2 -11  -5   35.80    6.40
   2 -11   5   40.10    8.40
  -2 -11   5   42.60    7.80
   3 -11   5  125.09   12.80
   3 -11  -5  143.49   14.20
  -3 -11   5  113.19   10.60
   4 -11   5   -4.90    4.30
   4 -11  -5    0.10    4.10
   5 -11   5   33.40    8.40
   5 -11  -5   41.80   10.20
   6 -11   5   27.50    8.10
   6 -11  -5   18.10    6.10
   6 -11  -5   17.30    8.30
   0 -12   5   10.20    5.40
   0 -12  -5   11.50    6.00
  -1 -12  -5   55.59    9.30
   1 -12   5   50.29    9.60
  -1 -12   5   64.59    9.00
   1 -12  -5   56.89   10.30
   2 -12   5   79.99   10.80
   2 -12  -5   50.39   10.10
  -2 -12   5   59.49    9.50
   3 -12   5    3.50    5.50
   3 -12  -5    8.70    6.30
   4 -12  -5   10.80    7.50
   5 -12   5   64.59   11.50
   5 -12  -5   52.99   10.80
   0 -13  -5   36.20    8.80
   0 -13   5   27.10    8.00
   1 -13   5  118.59   13.00
  -1 -13  -5  103.79   11.60
  -1 -13   5   90.29   11.10
   1 -13  -5   93.59   12.20
   2 -13   5   28.80    8.80
   2 -13  -5   28.30    8.60
  -2 -13   5   36.30    7.40
   3 -13   5   68.79   12.20
   3 -13  -5   88.49   12.70
   4 -13   5    1.70    6.00
   4 -13  -5  -10.60    5.90
   0 -14   5   -4.50    5.80
   0 -14  -5    3.50    6.10
   1 -14   5   70.79   12.10
  -1 -14  -5   41.80    8.50
  -1 -14   5   38.50    9.20
   1 -14  -5   44.30   10.80
   2 -14   5  126.29   15.10
  -2 -14   5  176.08   14.90
   2 -14  -5  172.78   17.00
   0   0   6 8204.48  291.47
  -1   0   6  263.27   12.80
   1   0   6  277.07   11.50
   1   0   6  277.77   11.20
  -1   0   6  277.57   14.30
   2   0   6  104.99    5.50
  -2   0   6  102.29    8.70
  -2   0   6   92.39    7.00
   2   0   6  110.79    5.10
  -3   0   6    3.00    3.10
  -3   0   6    4.70    3.70
   3   0   6    3.30    1.00
   3   0   6    2.40    1.30
   4   0  -6   13.50    3.40
  -4   0   6    6.00    4.40
   4   0  -6   10.50    2.80
  -4   0   6    8.90    3.70
   4   0   6    9.90    2.50
   5   0  -6  409.26   18.90
   5   0   6  399.86   18.40
  -5   0   6  439.66   24.90
   5   0  -6  380.86   18.80
  -6   0   6    5.70    5.00
   6   0  -6   13.40    4.00
   7   0  -6  274.47   16.10
   7   0   6  271.87   15.40
   8   0  -6  186.38   13.40
   8   0   6  162.88   12.30
   9   0  -6    6.70    4.10
   9   0   6    1.10    3.90
   0  -1   6   97.39    5.70
   0  -1  -6  101.69    5.50
   0   1   6  103.99    5.00
   0   1   6  100.29    6.10
   0  -1   6   98.99    4.60
  -1   1   6  714.83   29.50
   1  -1   6  751.32   27.10
  -1   1   6  711.53   30.90
   1  -1   6  746.13   27.50
   1  -1  -6  688.13   28.30
   1   1   6  746.93   27.20
  -1  -1   6  691.23   29.50
   1   1   6  753.02   27.80
  -1  -1   6  703.83   28.40
  -2   1   6 1761.62   67.89
   2  -1   6 1803.02   64.89
  -2   1   6 1708.93   69.29
   2  -1   6 1873.91   64.79
  -2  -1   6 1780.62   68.19
   2   1   6 1768.52   64.29
   2   1   6 1823.72   64.89
  -2  -1   6 1780.32   66.89
   2  -1  -6 1737.03   66.29
  -3   1   6  592.44   26.40
  -3   1   6  618.24   28.80
   3  -1   6  611.24   22.70
   3  -1   6  586.74   23.40
   3   1   6  567.64   23.00
  -3  -1   6  534.65   26.70
  -3  -1   6  579.54   25.50
   3  -1  -6  598.94   24.80
   4   1  -6  101.59    6.50
   4  -1   6  103.89    5.40
   4  -1   6   95.19    6.50
  -4   1   6   85.49   10.20
   4   1  -6   88.49    6.70
  -4  -1   6  111.49   10.20
   4  -1  -6   93.49    6.90
   4   1   6   87.29    6.00
  -4  -1   6   96.69    8.30
   4  -1  -6   90.89    7.10
   5  -1   6  376.86   17.30
   5   1  -6  357.26   17.40
   5   1  -6  372.26   17.40
  -5   1   6  377.76   23.60
  -5  -1   6  394.76   22.80
  -5  -1   6  327.37   18.90
   5  -1  -6  345.37   17.50
   5  -1  -6  367.96   18.00
   5   1   6  374.06   16.80
  -6   1   6   25.30    7.60
   6   1  -6   23.90    4.70
   6  -1   6   24.90    4.80
  -6  -1   6   13.80    6.70
   6  -1  -6   13.70    4.20
   6  -1  -6   14.80    3.90
   6   1   6   18.60    4.00
   7  -1   6  174.28   11.70
  -7   1   6  154.88   17.50
   7   1  -6  183.38   12.10
   7   1   6  152.68   10.80
   7  -1  -6  160.58   11.90
   8  -1   6   18.50    5.40
   8  -1  -6   10.30    4.80
   8   1   6   22.70    5.30
   9  -1   6   96.39    9.40
   9   1  -6   95.49   10.40
   9  -1  -6  101.19   10.60
   9   1   6   79.89    8.90
   0   2   6 1193.08   42.70
   0  -2  -6 1143.49   42.60
   0  -2   6 1115.59   42.50
   0  -2   6 1089.39   41.00
   0   2   6 1142.79   43.60
  -1  -2  -6  258.57   11.10
  -1   2   6  252.87   14.80
   1  -2   6  271.27   10.60
  -1   2   6  239.98   12.90
  -1  -2   6  255.37   12.60
   1  -2  -6  244.88   12.00
   1   2   6  266.17   10.80
   1   2   6  269.07   11.80
  -1  -2   6  260.77   11.80
  -2   2   6  714.13   32.70
   2  -2   6  695.43   27.60
   2  -2   6  732.23   28.20
  -2  -2  -6  745.73   26.90
  -2  -2   6  708.83   29.10
   2   2   6  746.83   27.70
   2  -2  -6  743.03   29.60
  -2  -2   6  720.23   30.00
   3  -2   6  161.78    8.40
   3   2  -6  170.48    8.50
  -3   2   6  186.68   13.20
   3  -2  -6  146.29    9.60
   3   2   6  180.38    8.30
  -3  -2   6  162.88   11.20
  -3  -2   6  167.68   10.20
  -4   2   6  104.29   11.50
   4   2  -6  109.39    6.90
   4  -2   6  115.99    6.70
   4  -2   6  111.69    7.10
   4  -2  -6  108.89    7.80
   4  -2  -6  115.29    8.30
  -4  -2   6  132.39   10.60
  -4  -2   6  112.79    8.90
   5   2  -6  283.77   14.30
   5   2  -6  268.97   13.80
   5  -2   6  281.27   14.20
  -5   2   6  311.77   21.20
   5  -2  -6  271.67   14.60
  -5  -2   6  265.57   15.80
  -5  -2   6  285.77   18.40
   5   2   6  276.07   13.40
   5  -2  -6  265.97   14.90
   6   2  -6   48.30    5.90
   6  -2   6   58.09    6.00
  -6   2   6   64.19   12.30
   6   2   6   60.99    5.90
   6  -2  -6   58.29    6.80
   6  -2  -6   63.99    6.90
   7   2  -6   19.00    4.70
   7  -2   6   22.60    5.20
  -7   2   6   39.20   10.50
   7   2   6   10.20    3.70
   7  -2  -6   13.30    4.80
   8  -2   6   53.19    6.80
   8   2  -6   43.00    7.20
   8   2   6   55.89    6.70
   8  -2  -6   54.79    7.40
   9  -2   6   65.39    8.70
   9   2  -6   56.39    8.00
   9  -2  -6   47.10    8.40
   9   2   6   49.30    7.10
   0   3   6  372.46   17.70
   0  -3  -6  386.96   16.80
   0  -3   6  381.36   16.50
   0  -3   6  399.86   14.70
   1  -3   6  989.40   36.20
   1  -3   6  989.80   37.90
  -1  -3  -6 1006.10   37.30
  -1   3   6  921.41   41.10
   1   3   6  992.00   36.40
  -1  -3   6  970.30   37.50
  -1  -3   6 1000.60   37.90
   1  -3  -6 1004.50   38.60
   2  -3   6  315.57   14.40
  -2   3   6  296.57   18.10
   2  -3   6  317.97   13.40
  -2  -3  -6  322.77   12.90
   2  -3  -6  310.37   15.30
  -2  -3   6  322.27   14.60
   2   3   6  329.77   13.40
  -2  -3   6  320.27   14.90
  -3  -3  -6   16.90    1.70
   3  -3   6   18.50    3.00
   3  -3   6   18.00    3.20
  -3   3   6   12.50    4.70
   3   3  -6   14.10    2.30
   3  -3  -6   11.30    3.30
  -3  -3   6   16.40    3.50
  -3  -3   6   15.40    4.20
   4  -3   6  267.17   12.90
   4   3  -6  255.47   12.10
  -4   3   6  273.17   18.90
   4  -3   6  252.47   12.60
   4  -3  -6  237.88   14.00
  -4  -3   6  246.78   15.30
   4   3   6  261.47   11.90
  -4  -3   6  248.78   14.00
   5   3  -6  111.59    7.50
   5  -3   6  113.39    8.30
  -5   3   6  106.19   13.30
   5  -3   6  113.29    7.80
   5  -3  -6  115.09    9.00
   5  -3  -6  129.49    9.00
  -5  -3   6  116.29    9.40
   6  -3   6   44.90    6.10
   6   3  -6   51.79    5.50
  -6   3   6   36.70    9.60
   6  -3  -6   38.20    6.50
   6   3   6   50.79    5.20
   6  -3  -6   49.70    6.00
  -7   3   6   21.70    9.30
   7   3  -6    6.10    3.60
   7  -3   6    0.80    3.40
   7   3   6    4.00    2.90
   7  -3  -6   10.80    4.40
   8   3  -6   26.70    6.40
   8  -3   6   23.90    6.00
   8   3   6   13.80    4.30
   8  -3  -6   24.80    6.40
   9  -3   6    3.90    4.70
   9  -3  -6    9.70    5.60
   9   3   6    1.80    3.30
   0  -4   6 1461.05   55.19
   0   4   6 1445.96   57.29
   0  -4  -6 1435.86   55.19
   0  -4   6 1501.45   52.49
   1  -4   6  618.44   22.60
   1  -4   6  588.14   24.80
  -1  -4  -6  604.04   24.10
  -1   4   6  618.34   28.40
   1  -4  -6  583.44   25.40
  -1  -4   6  578.14   24.50
   2  -4   6  487.15   21.00
  -2  -4  -6  500.35   19.40
   2  -4   6  474.65   19.30
  -2   4   6  466.45   24.70
   2   4   6  481.85   19.10
   2  -4  -6  459.75   21.70
  -2  -4   6  497.25   19.90
   3   4  -6    3.80    1.40
  -3   4   6    1.20    4.10
   3  -4   6    0.40    1.60
   3  -4   6    3.50    2.50
  -3  -4  -6    3.50    1.20
  -3  -4   6    2.10    2.30
   3  -4  -6    1.00    2.60
  -3  -4   6    4.50    2.60
   3   4   6    5.80    1.70
   4  -4   6  364.56   16.90
   4  -4   6  369.36   17.40
   4   4  -6  362.06   15.60
   4   4   6  353.96   15.70
   4  -4  -6  361.46   17.80
   4  -4  -6  366.36   18.70
  -4  -4   6  370.86   17.90
   5  -4   6  294.87   15.50
   5   4  -6  298.77   14.20
  -5   4   6  310.07   22.60
   5  -4   6  300.67   15.40
   5  -4  -6  288.57   16.80
   5  -4  -6  309.37   16.10
   5   4   6  295.17   14.00
  -6   4   6  391.06   27.90
   6   4  -6  389.36   18.40
   6  -4   6  387.76   19.60
   6  -4  -6  383.46   20.90
   6  -4  -6  394.26   20.50
   7  -4   6   52.89    7.10
  -7   4   6   55.09   13.00
   7   4   6   41.80    5.30
   7  -4  -6   39.20    7.40
   8  -4   6   61.99    8.50
   8  -4  -6   55.99    8.60
   8   4   6   63.69    7.30
   0  -5   6   -1.90    1.70
   0   5   6   -0.90    2.60
   0  -5  -6    4.80    2.60
   0  -5   6    0.90    0.60
   1  -5   6  317.77   12.20
  -1   5   6  299.67   17.70
  -1  -5  -6  294.07   14.00
   1  -5   6  270.77   14.50
   1   5   6  314.17   13.50
   1  -5  -6  273.77   14.90
  -1  -5   6  315.37   14.60
  -2  -5  -6   51.59    4.30
  -2   5   6   30.80    7.00
   2  -5   6   44.50    5.10
   2  -5   6   45.40    3.70
  -2  -5   6   47.50    4.70
   2  -5  -6   49.70    5.90
   2   5   6   44.40    3.30
  -3  -5  -6   11.40    2.40
   3   5  -6   10.60    1.70
   3  -5   6    7.80    3.10
  -3   5   6    7.90    4.40
   3  -5   6    8.00    2.40
   3   5   6   12.10    2.20
   3  -5  -6   19.00    4.60
  -3  -5   6    5.60    2.60
   4   5  -6  565.84   22.80
   4  -5   6  566.34   24.50
   4  -5   6  586.24   25.70
  -4   5   6  639.04   32.80
   4   5   6  559.84   23.20
  -4  -5   6  548.55   25.20
   4  -5  -6  555.44   26.70
   5  -5   6   37.40    5.40
   5  -5   6   43.30    6.20
  -5   5   6   59.29   11.80
   5  -5  -6   50.29    6.20
   5  -5  -6   60.19    7.90
   5   5   6   52.09    4.90
   6  -5   6  105.09    8.90
  -6   5   6  103.79   14.90
   6  -5  -6   86.09    9.30
   6  -5  -6   87.89    8.80
   6   5   6   77.79    6.40
  -7   5   6    2.10    7.60
   7  -5   6   22.20    5.80
   7   5   6   14.20    3.80
   7  -5  -6    9.30    4.80
   8  -5   6   17.30    5.70
   8  -5  -6   26.10    7.10
   0  -6   6   15.80    1.40
   0  -6   6   21.00    3.80
   0  -6  -6   13.00    3.40
   0   6   6   13.90    4.20
  -1  -6  -6  226.98   11.90
   1  -6   6  192.38   11.90
   1  -6   6  212.18    9.00
  -1   6   6  211.28   14.40
  -1  -6   6  208.68   11.80
   1  -6  -6  209.18   12.50
  -2   6   6  446.36   23.90
   2  -6   6  407.86   19.90
  -2  -6  -6  409.76   18.20
   2  -6   6  398.46   17.00
  -2  -6   6  401.96   18.90
   2  -6  -6  414.96   20.50
   2   6   6  403.46   16.30
   3  -6   6  320.47   16.70
  -3   6   6  333.27   21.40
   3  -6   6  327.67   14.70
   3   6   6  314.67   13.60
  -3  -6   6  286.77   15.50
   3  -6  -6  327.27   17.80
  -4   6   6   -0.40    5.10
   4  -6   6    4.90    2.80
   4  -6   6    4.80    3.30
   4  -6  -6    3.20    2.60
  -4  -6   6    0.20    2.30
   4   6   6    0.90    1.50
   4  -6  -6   -1.20    2.60
   5  -6   6  190.38   11.70
   5  -6   6  167.38   12.10
  -5   6   6  224.68   19.90
   5  -6  -6  188.48   13.80
   5   6   6  178.98    9.90
   5  -6  -6  203.18   12.70
   6  -6   6    3.60    3.50
  -6   6   6   16.30    8.20
   6  -6  -6    4.00    3.80
   6  -6  -6    0.40    3.90
  -7   6   6   56.99   14.30
   7  -6   6   51.49    8.10
   7  -6  -6   45.00    8.20
   7  -6  -6   49.30    8.90
   8  -6   6   10.10    4.80
   8  -6  -6   11.50    5.60
   0  -7  -6   24.00    4.90
   0   7   6   13.90    4.40
   0  -7   6   27.70    4.70
   1  -7   6  387.66   19.60
   1  -7   6  417.76   15.70
  -1   7   6  402.46   22.30
  -1  -7  -6  408.26   19.20
  -1  -7   6  376.66   19.10
   1  -7  -6  395.36   20.20
   1   7   6  371.46   20.00
   2  -7   6  141.69   10.60
  -2   7   6  169.38   13.70
   2  -7   6  137.19    7.70
  -2  -7  -6  158.08    9.40
   2  -7  -6  147.99   11.20
   2   7   6  147.29    8.40
  -2  -7   6  151.68    9.90
  -3   7   6  446.66   26.60
   3  -7   6  491.75   23.00
   3  -7   6  427.56   19.50
  -3  -7   6  475.85   21.30
   3  -7  -6  456.45   23.40
   3   7   6  427.96   18.00
   4  -7   6  108.89    9.70
   4  -7   6  113.79    8.20
  -4   7   6  106.29   13.40
  -4  -7   6  102.89    8.60
   4  -7  -6  109.99   10.50
   4  -7  -6  109.89    8.70
   5  -7   6  133.59   11.20
  -5   7   6  132.89   16.30
   5  -7   6  129.09    9.70
   5  -7  -6  137.89   12.10
   5  -7  -6  152.58   11.10
   6  -7   6    6.80    4.30
   6  -7   6   15.70    4.70
  -6   7   6   10.40    8.00
   6  -7  -6   18.00    5.40
   6  -7  -6   12.60    5.50
  -7   7   6  191.58   22.20
   7  -7   6  202.68   13.90
   7  -7  -6  160.48   14.60
   7  -7  -6  186.78   14.60
   8  -7   6   92.49   10.30
   8  -7  -6  108.79   11.80
   0  -8  -6   94.69    8.80
   0   8   6   91.39    9.40
   0  -8   6  114.29    9.20
   1  -8   6  129.29   10.20
  -1   8   6  105.09   10.50
  -1  -8  -6  107.99    9.00
   1   8   6  114.29    9.80
  -1  -8   6  122.29    9.40
   1  -8  -6  118.29   10.20
  -2   8   6  205.28   16.10
   2  -8   6  204.78   13.40
  -2  -8  -6  184.78   11.60
  -2  -8   6  196.98   12.20
   2  -8  -6  208.88   14.20
  -3   8   6   64.79   11.30
   3  -8   6   80.69    8.60
   3  -8   6   72.29    5.80
   3  -8  -6   60.89    8.50
  -3  -8   6   53.79    6.40
   4  -8   6  168.78   10.40
  -4   8   6  177.08   17.20
   4  -8   6  155.08   12.50
   4  -8  -6  161.28   13.60
   4  -8  -6  169.58   11.20
  -4  -8   6  150.98   11.50
   5  -8   6   69.49    9.30
  -5   8   6   79.59   14.60
   5  -8   6   68.19    7.20
   5  -8  -6   68.09    7.80
  -6   8   6   80.49   16.00
   6  -8   6   73.69    9.20
   6  -8   6   62.29    7.60
   6  -8  -6   64.79    8.50
   6  -8  -6   67.79   10.30
  -7   8   6  141.69   20.70
   7  -8   6  122.09   10.90
   7  -8  -6  116.09   11.90
   7  -8  -6  123.39   13.10
   0  -9  -6  476.25   24.50
   0  -9   6  488.75   24.10
  -1  -9  -6   77.29    8.00
   1  -9   6   64.99    8.10
  -1   9   6   71.09    9.40
   1  -9  -6   67.99    8.60
  -1  -9   6   80.59    8.20
  -2  -9  -6  339.27   17.90
  -2   9   6  334.47   21.60
   2  -9   6  343.07   19.50
  -2  -9   6  334.37   18.20
   2  -9  -6  373.46   21.00
  -3   9   6   89.69   12.40
   3  -9   6   73.89    9.40
   3  -9  -6   79.99    7.80
   3  -9  -6   92.49    9.90
  -3  -9   6  102.29    8.70
   4  -9   6  122.59    9.30
   4  -9   6  159.98   12.90
  -4   9   6  154.38   16.20
   4  -9  -6  147.69   13.50
   4  -9  -6  138.89   10.30
  -5   9   6   47.10   12.00
   5  -9   6   24.30    6.70
   5  -9   6   26.00    5.40
   5  -9  -6   45.90    9.20
   5  -9  -6   30.00    6.10
   6  -9   6   14.90    6.10
  -6   9   6   13.20    9.70
   6  -9   6    8.10    4.50
   6  -9  -6    4.50    4.20
   6  -9  -6   23.40    7.60
   7  -9   6   81.69    9.20
   7  -9  -6   74.29   11.40
   7  -9  -6   59.29    9.80
   0 -10   6    1.90    3.80
   0 -10  -6    1.00    4.10
   1 -10   6  163.68   13.60
  -1 -10  -6  190.88   13.30
  -1 -10   6  188.08   13.40
   1 -10  -6  185.48   14.40
   2 -10   6  177.88   13.80
  -2 -10  -6  150.58   11.60
  -2 -10   6  183.48   12.50
   2 -10  -6  161.48   13.80
   3 -10   6  112.89   11.50
  -3  10   6   84.39   12.80
   3 -10  -6  117.99   12.10
  -3 -10   6  111.49    9.80
   3 -10  -6  103.29    8.70
   4 -10   6    8.10    5.30
  -4  10   6   -0.30    5.00
   4 -10  -6    7.70    5.70
   4 -10  -6    1.70    3.00
  -5  10   6   23.40   10.30
   5 -10   6   18.20    6.50
   5 -10  -6   22.80    6.30
   5 -10  -6   18.80    7.30
  -6  10   6  245.48   23.60
   6 -10   6  234.98   17.50
   6 -10  -6  205.58   15.40
   6 -10  -6  228.08   18.70
   0 -11   6   56.29    8.40
   0 -11  -6   56.19    9.20
   1 -11   6   83.69    9.50
  -1 -11  -6   93.59    9.70
  -1 -11   6   62.99    8.70
   1 -11  -6   75.59   10.30
  -2 -11  -6    8.60    5.50
   2 -11   6   28.00    7.20
  -2 -11   6   16.60    5.20
   2 -11  -6   18.40    7.00
   3 -11   6  115.89   11.50
   3 -11  -6  126.19   13.70
  -3 -11   6  115.29   10.50
   4 -11   6   19.00    7.20
   4 -11  -6   15.80    7.40
  -5  11   6   88.09   15.50
   5 -11   6   53.49    9.90
   5 -11  -6   57.19   11.40
  -6  11   6   43.90   13.50
   6 -11   6   52.39   10.60
   6 -11  -6   61.59   12.20
   6 -11  -6   50.19    8.40
   0 -12  -6   79.89   10.30
   0 -12   6   88.09   11.00
  -1 -12  -6  213.98   15.90
   1 -12   6  206.38   16.50
  -1 -12   6  208.58   15.70
   1 -12  -6  231.58   17.80
   2 -12   6   21.40    6.90
  -2 -12   6   28.50    6.70
   2 -12  -6   20.60    7.30
   3 -12   6  146.09   14.70
   3 -12  -6  191.28   17.00
  -3 -12   6  149.99   13.40
   4 -12   6  205.28   17.20
   4 -12  -6  162.58   16.90
   5 -12   6   55.69   11.00
   5 -12  -6   83.19   12.60
   0 -13  -6   11.10    6.60
   0 -13   6   16.80    7.00
   1 -13   6    5.60    4.30
  -1 -13  -6   13.40    5.60
   1 -13  -6    5.10    5.70
  -1 -13   6    6.10    5.60
   2 -13   6   63.39   11.30
   2 -13  -6   58.39   11.70
  -2 -13   6   70.99    9.50
   3 -13   6   15.30    7.40
   3 -13  -6   31.60    9.20
   4 -13   6   70.89   12.20
   4 -13  -6   58.89   11.70
   0 -14  -6   10.30    6.60
   0 -14   6    7.40    6.10
  -1 -14  -6   63.39   10.80
   1 -14   6   40.30    9.80
   1 -14  -6   42.60   10.00
  -1 -14   6   38.40    8.90
   2 -14   6  138.59   15.00
  -2 -14   6  117.69   12.70
   2 -14  -6  134.39   15.50
   0   0   7   -1.60    0.90
   0   0   7   -4.30    1.70
  -1   0   7   18.90    3.60
   1   0   7   22.30    2.90
   1   0   7   23.70    2.20
  -1   0   7   23.60    5.10
   2   0   7   14.00    1.90
   2   0   7   17.30    2.00
  -2   0   7   18.80    5.10
  -2   0   7   10.10    3.50
   3   0   7   29.80    2.90
   3   0  -7   33.80    4.10
  -3   0   7   25.20    4.70
   3   0   7   27.90    2.30
  -3   0   7   23.90    5.90
   4   0  -7    1.50    2.00
   4   0   7    1.40    1.80
  -4   0   7    2.10    3.80
   4   0  -7    3.20    2.00
  -4   0   7   -2.00    2.60
  -5   0   7    2.40    4.60
   5   0   7   -1.60    1.90
  -5   0   7   -1.70    2.90
   5   0  -7   -2.20    1.80
   5   0  -7   -1.60    2.00
   6   0   7  327.87   16.60
   6   0  -7  350.66   17.60
   6   0  -7  325.27   17.20
  -6   0   7  311.37   22.70
  -7   0   7   18.40    8.40
   7   0   7   17.30    4.60
   7   0  -7   19.20    5.10
   8   0   7  224.48   13.90
   8   0  -7  170.08   13.40
   9   0  -7   98.99   10.50
   9   0   7  112.29   10.50
   0   1   7  167.48    7.60
   0  -1   7  180.98    7.40
   0   1   7  169.28    9.30
   0  -1   7  170.98    8.60
   1  -1   7 1957.30   67.79
   1  -1   7 1871.81   67.09
  -1   1   7 1767.22   71.29
  -1   1   7 1914.01   69.89
   1   1   7 1852.61   67.89
  -1  -1   7 1751.52   69.89
   1   1   7 1929.01   67.29
  -1  -1   7 1797.82   68.69
   1  -1  -7 1826.32   68.39
   2  -1   7  379.96   15.00
  -2   1   7  338.87   19.20
   2  -1   7  365.66   15.00
  -2  -1   7  359.86   17.10
   2  -1  -7  377.16   16.70
   2   1   7  375.86   15.10
   2   1   7  354.96   14.70
   3  -1   7  210.08   10.20
  -3   1   7  216.08   13.20
   3  -1   7  221.68    9.60
  -3   1   7  206.98   14.70
   3   1   7  217.68   10.10
   3  -1  -7  216.28   11.70
   3   1   7  217.88    8.70
  -3  -1   7  200.98   13.50
  -3  -1   7  227.28   12.60
  -4   1   7   96.79    8.90
   4  -1   7  107.89    6.60
  -4   1   7   86.19   10.40
   4  -1   7  100.99    5.50
   4   1  -7   89.79    6.90
  -4  -1   7   89.59    8.30
   4  -1  -7  104.69    7.80
   4   1   7  102.89    6.20
  -4  -1   7   96.59   10.00
   5  -1   7   47.10    5.10
   5   1  -7   36.50    4.70
   5   1  -7   41.50    4.90
  -5   1   7   31.10    8.20
  -5  -1   7   36.80    6.80
   5  -1  -7   35.20    5.00
   5  -1  -7   39.20    4.60
  -5  -1   7   44.40    8.90
   5   1   7   38.60    4.10
  -6   1   7  120.09   14.30
   6   1  -7  117.49    8.80
   6  -1   7  107.59    8.50
   6   1   7  113.39    8.20
  -6  -1   7  112.99   13.30
   6  -1  -7  109.29    9.10
   6  -1  -7  113.39    9.10
   7   1  -7   29.20    5.60
   7  -1   7   36.50    6.20
  -7   1   7   35.40   10.60
   7   1   7   33.30    5.70
   7  -1  -7   32.30    6.10
   8   1  -7    7.20    4.20
   8  -1   7    7.10    4.20
   8   1   7    3.70    3.60
   8  -1  -7    8.00    4.50
   9  -1   7   -2.70    3.30
   9   1  -7    0.20    3.90
   9   1   7   -0.10    3.70
   9  -1  -7    6.60    4.50
   0  -2   7 2304.37   86.59
   0  -2   7 2424.66   88.19
   0   2   7 2482.85   89.49
   0   2   7 2545.85   88.19
   0  -2  -7 2369.76   88.19
   1  -2   7  820.32   30.50
  -1   2   7  803.62   33.70
  -1  -2  -7  843.42   31.20
  -1   2   7  820.12   35.60
   1  -2   7  852.61   31.70
   1   2   7  812.72   30.70
   1   2   7  837.32   32.10
  -1  -2   7  794.72   32.00
  -1  -2   7  790.42   32.90
  -2   2   7   52.49    6.20
  -2   2   7   63.39    7.30
  -2  -2  -7   62.79    3.70
   2  -2   7   63.49    4.10
  -2  -2   7   69.19    5.70
  -2  -2   7   64.19    6.30
   2  -2  -7   52.09    5.20
   2   2   7   56.49    4.00
   3  -2   7  135.69    7.60
   3  -2   7  153.68    7.80
  -3   2   7  140.59   11.80
   3  -2  -7  142.59    9.30
   3   2   7  148.29    7.60
  -3  -2   7  146.69    9.70
  -3  -2   7  128.69   10.10
  -4   2   7  185.78   15.60
   4  -2   7  214.58   11.10
   4   2  -7  217.88   10.80
   4  -2   7  206.88   10.30
   4   2   7  212.98   10.50
   4  -2  -7  218.88   12.50
  -4  -2   7  234.98   13.40
  -4  -2   7  225.68   14.70
   5   2  -7  122.39    8.60
   5  -2   7  124.89    8.50
  -5   2   7  120.39   13.60
   5   2  -7  124.99    8.20
   5  -2  -7  122.59    9.60
  -5  -2   7  123.49   12.10
   5  -2  -7  131.19    9.10
   5   2   7  137.99    8.10
  -5  -2   7  137.29   10.50
  -6   2   7    6.70    6.60
   6  -2   7    5.00    3.20
   6   2  -7    5.60    2.80
   6   2   7    3.50    2.50
   6  -2  -7   -1.60    2.80
  -6  -2   7    2.40    4.60
  -7   2   7   72.19   14.30
   7  -2   7   75.49    7.90
   7   2  -7   75.19    7.70
   7  -2  -7   86.89    8.80
   7   2   7   78.49    7.20
   8   2  -7   40.60    7.00
   8  -2   7   53.29    6.80
   8  -2  -7   52.09    7.90
   8   2   7   40.30    6.10
   9   2  -7   15.90    6.20
   9   2   7   11.80    4.30
   9  -2  -7   17.20    6.50
   0  -3  -7  906.81   35.80
   0  -3   7  959.60   33.80
   0  -3   7  955.90   35.90
   0   3   7  862.01   36.80
   1  -3   7   40.80    2.80
  -1  -3  -7   40.00    3.70
   1  -3   7   36.80    3.90
  -1   3   7   47.30    7.00
  -1  -3   7   34.90    4.40
   1   3   7   40.60    2.90
  -1  -3   7   33.20    3.90
   1  -3  -7   35.50    4.40
  -2   3   7   14.70    5.20
   2  -3   7   18.00    3.10
  -2  -3  -7   13.40    2.10
   2   3   7   17.60    2.30
   2  -3  -7   17.40    3.40
  -2  -3   7   20.60    3.90
  -2  -3   7   15.10    3.20
  -3  -3  -7  415.46   14.80
   3  -3   7  378.06   16.90
   3  -3   7  393.16   17.50
  -3   3   7  363.86   22.20
   3   3   7  409.46   16.80
  -3  -3   7  386.66   18.50
   3  -3  -7  402.46   19.20
  -3  -3   7  406.56   19.60
   4   3  -7   48.10    4.40
   4  -3   7   51.39    4.90
   4  -3   7   47.20    4.50
  -4   3   7   59.69   10.50
  -4  -3   7   48.20    7.10
   4  -3  -7   38.90    5.50
   4   3   7   52.79    4.40
  -4  -3   7   59.39    6.50
   5   3  -7  195.48   10.90
  -5   3   7  208.88   18.10
   5  -3   7  222.28   12.00
   5  -3   7  195.98   11.00
   5  -3  -7  206.48   13.20
   5   3   7  199.88   10.70
  -5  -3   7  217.68   15.20
   5  -3  -7  216.98   12.40
  -5  -3   7  182.18   13.10
  -6   3   7  135.69   15.00
   6   3  -7  122.39    8.60
   6  -3   7  114.09    9.10
   6  -3  -7  131.49   10.50
   6  -3  -7  107.59    9.00
   6   3   7  111.29    7.90
   7   3  -7   24.30    5.40
   7  -3   7   29.20    5.60
  -7   3   7   25.40    9.40
   7   3   7   34.60    5.00
   7  -3  -7   24.80    5.30
   8  -3   7   58.39    7.30
   8   3   7   44.80    6.30
   8  -3  -7   63.59    8.60
   9  -3   7   52.69    9.10
   9  -3  -7   49.40    9.00
   9   3   7   65.59    8.40
   0  -4   7 2278.37   78.39
   0   4   7 2090.69   83.19
   0  -4  -7 2247.08   81.39
   0  -4   7 2132.09   80.99
  -1  -4  -7  420.16   17.90
   1  -4   7  413.06   18.50
   1  -4   7  426.06   16.40
   1   4   7  426.56   16.60
   1  -4  -7  410.46   19.00
  -1  -4   7  396.86   18.30
  -1  -4   7  433.66   17.60
  -2  -4  -7  695.53   26.10
  -2   4   7  694.53   32.60
   2  -4   7  631.34   27.50
   2  -4   7  628.94   25.80
   2   4   7  690.13   25.90
  -2  -4   7  687.33   27.00
  -2  -4   7  654.93   27.60
   2  -4  -7  669.33   28.60
   3  -4   7  282.97   13.50
  -3   4   7  289.57   18.50
   3  -4   7  248.48   12.10
   3   4  -7  271.77   11.20
  -3  -4   7  243.48   13.40
   3   4   7  250.97   11.70
  -3  -4   7  256.47   13.30
   3  -4  -7  236.48   14.20
   4   4  -7   57.19    4.40
   4  -4   7   53.99    5.20
   4  -4   7   47.90    5.10
  -4   4   7   49.99    9.80
  -4  -4   7   45.50    6.10
   4   4   7   39.90    4.30
   4  -4  -7   50.29    6.50
  -4  -4   7   39.90    5.80
   5   4  -7   43.60    4.60
   5  -4   7   38.10    5.20
   5  -4   7   36.70    5.20
  -5   4   7   35.80   10.00
  -5  -4   7   51.79   10.40
   5   4   7   48.70    4.70
   5  -4  -7   45.60    5.80
   5  -4  -7   47.70    7.60
   6  -4   7   61.09    6.90
   6   4  -7   52.59    5.60
  -6   4   7   97.59   15.80
   6   4   7   61.59    5.80
   6  -4  -7   67.19    7.60
   6  -4  -7   68.49    7.80
  -7   4   7   23.10   10.50
   7  -4   7   30.70    6.10
   7  -4  -7   47.70    7.90
   7   4   7   37.40    5.10
   8  -4   7   21.60    6.00
   8   4   7   11.90    4.00
   8  -4  -7    9.60    4.60
   0  -5   7   79.89    3.80
   0  -5  -7   87.39    6.80
   0  -5   7   72.99    6.20
   0   5   7   72.99    7.90
  -1   5   7  181.88   13.50
   1  -5   7  190.58    8.00
  -1  -5  -7  181.48    9.90
  -1  -5   7  176.38   10.30
  -1  -5   7  176.18    8.00
   1  -5  -7  187.08   11.10
   2   5  -7  420.36   15.40
  -2  -5  -7  434.46   17.80
   2  -5   7  399.16   19.10
  -2   5   7  417.26   23.50
   2  -5   7  420.06   16.90
  -2  -5   7  440.56   16.70
   2   5   7  381.36   16.50
  -2  -5   7  377.66   18.50
   2  -5  -7  391.06   19.60
   3  -5   7  386.56   19.30
   3   5  -7  439.06   16.40
  -3   5   7  408.86   24.80
   3  -5   7  399.66   17.90
   3  -5  -7  434.06   21.00
  -3  -5   7  420.76   19.40
   3   5   7  413.46   17.40
   4  -5   7  544.85   24.60
  -4   5   7  560.44   31.50
   4  -5   7  533.35   23.30
  -4  -5   7  529.65   24.60
   4   5   7  511.45   22.10
   4  -5  -7  571.44   26.30
  -5   5   7   55.59   11.40
   5  -5   7   75.39    6.90
   5  -5   7   71.19    7.30
   5  -5  -7   82.19    7.60
   5   5   7   69.19    5.70
   5  -5  -7   84.29    8.70
  -6   5   7   99.99   16.50
   6  -5   7   80.49    7.40
   6  -5  -7   73.39    8.60
   6   5   7   69.29    6.10
   6  -5  -7   77.29    7.80
   7  -5   7   46.50    6.90
  -7   5   7   38.00   12.20
   7   5   7   35.70    5.00
   7  -5  -7   22.40    6.60
   7  -5  -7   30.70    6.90
   8  -5   7   21.70    6.40
   8  -5  -7   27.40    6.70
   0  -6   7   79.99    6.80
   0  -6   7   75.89    3.60
   0   6   7   62.79    8.20
   0  -6  -7   77.09    6.80
  -1  -6  -7    2.60    2.20
   1  -6   7    4.50    1.30
  -1   6   7   -4.00    2.80
   1  -6   7    2.40    2.50
  -1  -6   7    1.40    2.20
   1   6   7    1.20    2.10
   1  -6  -7   -2.20    2.20
   2  -6   7   38.10    4.80
  -2   6   7   27.00    7.00
   2  -6   7   28.90    3.10
  -2  -6  -7   26.30    3.90
   2  -6  -7   36.10    5.20
   2   6   7   39.10    3.10
  -2  -6   7   41.80    5.00
   3  -6   7   93.79    8.00
  -3   6   7  106.59   11.50
   3  -6   7   95.09    6.30
   3   6   7   84.49    5.30
  -3  -6   7   88.59    7.30
   3  -6  -7   72.39    8.30
   4  -6   7  121.69    9.50
  -4   6   7  122.99   14.20
   4  -6   7  116.79    7.90
  -4  -6   7  110.09    8.80
   4  -6  -7  110.09   10.20
   4   6   7  100.39    6.60
   4  -6  -7  125.39    9.30
  -5   6   7   12.50    7.20
   5  -6   7   13.30    3.60
   5  -6   7    7.70    3.80
   5  -6  -7    9.50    5.10
   5   6   7    8.70    2.50
   5  -6  -7   10.70    4.00
   6  -6   7   60.09    6.50
  -6   6   7   75.69   14.70
   6  -6  -7   61.69    7.80
   6  -6  -7   54.59    8.80
   6   6   7   42.80    5.30
   7  -6   7  202.18   14.10
  -7   6   7  229.18   23.50
   7  -6  -7  214.38   14.90
   7  -6  -7  207.18   16.10
   8  -6   7   68.19    8.90
   8  -6  -7   62.09   10.00
   0  -7  -7    7.60    3.40
   0   7   7    8.50    4.30
   0  -7   7    3.60    3.00
   1  -7   7  267.17   14.70
  -1   7   7  218.48   16.20
   1  -7   7  250.97   10.60
  -1  -7  -7  249.78   13.60
   1  -7  -7  251.07   14.40
  -1  -7   7  240.88   13.80
   1   7   7  234.48   14.90
  -2   7   7   49.30    9.10
  -2  -7  -7   38.50    4.80
   2  -7   7   41.30    3.80
   2  -7  -7   30.90    6.10
   2   7   7   42.70    4.30
  -2  -7   7   45.70    5.70
  -3   7   7  164.28   15.00
   3  -7   7  135.59   10.70
   3  -7   7  138.59    8.30
  -3  -7   7  129.19    9.80
   3  -7  -7  158.08   12.20
  -4   7   7   26.30    8.80
   4  -7   7   41.50    7.00
   4  -7   7   40.40    4.90
   4   7   7   33.20    4.40
  -4  -7   7   46.70    6.00
   4  -7  -7   54.69    7.90
   4  -7  -7   33.90    5.70
   5  -7   7   80.39    8.60
   5  -7   7   76.79    7.30
  -5   7   7   74.69   13.90
   5  -7  -7   72.39    7.70
   5  -7  -7   90.69   10.00
  -6   7   7   56.59   13.70
   6  -7   7   59.29   13.60
   6  -7   7   49.20    6.60
   6  -7  -7   41.20    7.40
   6  -7  -7   42.30    8.40
   7  -7   7   35.60    6.70
  -7   7   7   41.10   12.50
   7  -7  -7   24.40    6.60
   8  -7   7   63.49    8.80
   8  -7  -7   65.99   10.00
   0   8   7  111.89   10.80
   0  -8  -7  113.59    9.70
   0  -8   7  123.09    9.80
  -1   8   7   68.79    9.00
   1  -8   7   71.59    7.70
  -1  -8  -7   65.39    6.80
   1   8   7   49.60    7.40
  -1  -8   7   53.39    6.70
   1  -8  -7   66.59    7.70
   2  -8   7  215.08   13.90
  -2   8   7  206.68   16.50
  -2  -8  -7  220.78   12.50
   2  -8  -7  234.78   15.10
  -2  -8   7  212.38   13.20
  -3   8   7  206.08   17.70
   3  -8   7  200.88   10.80
   3  -8   7  214.08   14.30
  -3  -8   7  216.68   13.10
   3  -8  -7  212.88   15.10
   4  -8   7   71.69    6.30
  -4   8   7   84.59   13.90
  -4  -8   7   57.19    6.70
   4  -8  -7   58.99    8.90
   4  -8  -7   49.10    6.50
  -5   8   7   67.49   13.50
   5  -8   7   54.09    6.40
   5  -8   7   63.09    8.40
   5  -8  -7   54.59    7.30
   5  -8  -7   65.39    9.60
   6  -8   7  171.38   13.10
   6  -8   7  168.98   12.00
  -6   8   7  117.29   18.30
   6  -8  -7  137.69   12.10
   6  -8  -7  158.98   14.70
  -7   8   7   16.30   10.70
   7  -8   7   -3.80    3.40
   7  -8  -7    2.80    5.20
   7  -8  -7    4.40    4.50
   0  -9   7  190.18   13.20
   0  -9  -7  184.28   13.00
  -1  -9  -7   58.99    7.50
  -1   9   7   74.49   10.00
   1  -9   7   83.49    8.90
  -1  -9   7   79.69    8.20
   1  -9  -7   68.39    8.70
   2  -9   7   18.90    5.60
  -2   9   7   10.00    5.30
   2  -9  -7    2.20    4.30
  -2  -9   7    9.70    4.10
  -3   9   7   86.99   12.10
   3  -9   7  108.89   10.30
   3  -9  -7  105.19   10.70
  -3  -9   7   94.39    8.60
   3  -9  -7   75.69    7.60
  -4   9   7   89.39   15.30
   4  -9   7  122.09   11.20
   4  -9  -7  116.79    9.30
   4  -9  -7   88.69   11.40
  -5   9   7   33.20   10.70
   5  -9   7   39.00    7.80
   5  -9   7   21.90    4.80
   5  -9  -7   20.80    5.30
   5  -9  -7   15.00    6.80
   6  -9   7   41.30    8.90
  -6   9   7   90.19   17.10
   6  -9   7   48.70    6.70
   6  -9  -7   59.69   11.20
   6  -9  -7   47.40    8.20
   7  -9   7   19.50    5.90
  -7   9   7   11.80   10.90
   7  -9  -7   17.60    6.20
   7  -9  -7   17.50    6.70
   0 -10  -7  131.19   11.90
   0 -10   7  140.39   11.80
  -1 -10  -7   69.99    8.30
   1 -10  -7   70.79    9.30
  -1 -10   7   77.69    8.70
   2 -10   7   26.60    7.00
  -2 -10  -7   30.30    5.60
   2 -10  -7   33.10    7.90
  -2 -10   7   17.70    5.40
  -3  10   7   42.20    9.80
   3 -10   7   31.30    7.00
   3 -10  -7   40.40    5.70
  -3 -10   7   26.60    6.00
   3 -10  -7   37.10    8.40
   4 -10   7   46.70    8.50
  -4  10   7   45.80   11.70
   4 -10  -7   40.80    6.80
   4 -10  -7   31.60    8.40
   5 -10   7   44.10    8.60
  -5  10   7   21.10   10.80
   5 -10  -7   41.00    7.40
   5 -10  -7   30.90    8.60
  -6  10   7   28.30   11.60
   6 -10  -7   28.60    6.60
   6 -10  -7   28.00    8.70
   0 -11   7   -1.40    3.90
   0 -11  -7   -2.70    4.30
  -1 -11  -7  106.89   10.70
   1 -11   7  131.29   12.10
  -1 -11   7  102.69   10.80
   1 -11  -7  103.19   11.80
   2 -11   7  152.78   13.80
  -2 -11   7  169.48   13.00
   2 -11  -7  160.48   14.70
   3 -11   7  129.59   13.00
  -3 -11   7   91.29   10.00
   3 -11  -7  141.59   14.00
   4 -11   7   67.39   10.20
   4 -11  -7   54.19   10.90
   5 -11   7   88.39   11.60
  -5  11   7   93.09   16.70
   5 -11  -7   76.29   12.90
   6 -11  -7   78.59   10.60
   0 -12   7    5.20    5.10
   0 -12  -7    3.60    5.10
   1 -12   7   37.40    8.20
   1 -12  -7   25.90    7.50
  -1 -12   7   19.40    6.40
   2 -12   7   74.59   10.50
  -2 -12   7   57.39    9.30
   2 -12  -7   72.89   12.20
   3 -12   7   35.80    8.80
  -3 -12   7   46.60    8.30
   3 -12  -7   60.79   11.70
   4 -12   7    9.90    6.70
   4 -12  -7   16.50    8.00
   5 -12   7   75.49   12.30
   5 -12  -7   81.09   14.40
   0 -13  -7  153.98   14.60
   0 -13   7  152.48   14.70
   1 -13   7   63.39   11.60
  -1 -13  -7   60.19   10.80
  -1 -13   7   54.59    9.90
   1 -13  -7   55.29   10.60
   2 -13   7   98.99   12.50
   2 -13  -7   90.89   13.10
  -2 -13   7  121.79   12.30
   3 -13   7  101.49   12.80
   3 -13  -7  107.99   13.90
   4 -13   7  152.78   15.70
   4 -13  -7  118.49   15.20
   0 -14  -7   71.99   12.10
   0 -14   7   68.59   11.50
   1 -14   7   38.10    9.60
  -1 -14   7   35.80    8.90
   1 -14  -7   60.69   11.10
   2 -14   7   54.99   11.60
   2 -14  -7   73.29   12.70
  -2 -14   7   72.09   11.50
   0   0   8 1858.31   69.09
   0   0   8 1867.71   67.19
  -1   0   8   64.39    5.30
   1   0   8   54.49    3.70
  -1   0   8   58.89    6.80
   1   0   8   55.59    4.30
  -2   0   8  211.48   13.50
   2   0   8  209.18    9.80
  -2   0   8  222.28   12.50
   2   0   8  230.88    9.80
   3   0   8   82.49    4.50
  -3   0   8   70.89    7.50
   3   0   8   79.49    5.00
   3   0  -8   79.49    6.30
  -3   0   8   76.29    8.90
   4   0   8  174.68    9.70
  -4   0   8  174.98   14.30
  -4   0   8  197.18   13.20
   4   0  -8  209.98   11.50
   5   0   8   96.89    6.90
  -5   0   8   96.79    9.50
   5   0  -8   88.49    7.60
  -5   0   8   74.99    9.90
   5   0  -8   92.09    7.20
  -6   0   8  181.88   16.90
   6   0   8  158.48   10.10
   6   0  -8  136.59   10.40
   6   0  -8  148.19   10.40
  -7   0   8   22.20    8.60
   7   0  -8   15.60    4.80
   7   0   8   20.80    4.50
   8   0   8  126.19   10.30
   8   0  -8  101.69   10.10
   9   0   8    1.00    3.80
   9   0  -8    9.40    5.30
   0  -1   8  901.71   32.90
   0  -1   8  863.31   34.40
   0   1   8  905.41   33.30
   0   1   8  892.11   35.30
   1  -1   8  685.23   26.10
  -1   1   8  680.73   28.90
   1  -1   8  703.43   26.90
  -1   1   8  644.34   30.40
  -1  -1   8  705.93   29.50
  -1  -1   8  692.53   28.00
   1   1   8  683.63   26.20
   1   1   8  695.83   27.20
   1  -1  -8  687.73   27.60
   2  -1   8   85.69    5.10
  -2   1   8   85.99    7.60
   2  -1   8   85.19    5.20
  -2   1   8   85.89    8.50
  -2  -1   8   83.59    8.00
   2  -1  -8   84.59    6.50
   2   1   8   92.99    5.20
  -2  -1   8   93.29    7.20
  -3   1   8  105.09   10.40
   3  -1   8   91.19    5.70
   3  -1   8  102.79    5.50
  -3   1   8   77.89    8.10
  -3  -1   8   90.69    9.00
   3  -1  -8   82.59    6.90
   3   1   8   83.09    5.40
  -3  -1   8   79.39    7.50
   3   1   8   99.89    5.40
   4  -1   8    4.40    1.50
   4   1  -8    0.50    1.60
   4  -1   8    0.40    1.80
  -4   1   8   -0.30    3.10
   4   1  -8    3.30    2.30
   4   1   8    1.60    1.80
  -4  -1   8   -1.40    2.70
  -4  -1   8   12.50    5.00
   4  -1  -8    4.80    2.70
  -5   1   8  126.39   13.30
   5  -1   8   86.69    7.10
   5   1  -8   88.19    7.50
   5   1  -8  101.99    7.40
   5  -1  -8  104.09    8.40
   5  -1  -8  113.79    8.10
  -5  -1   8   88.49    9.30
  -5  -1   8  101.39   11.40
   5   1   8  112.89    7.30
   6   1  -8  155.28   10.80
   6  -1   8  168.58   10.80
  -6   1   8  166.18   16.90
  -6  -1   8  184.58   16.40
   6  -1  -8  148.69   11.10
   6  -1  -8  176.58   11.50
   6   1   8  177.18   10.30
   7   1  -8    8.00    3.70
  -7   1   8   18.00    7.30
   7  -1   8    7.40    3.20
   7  -1  -8    1.20    2.90
   7   1   8   12.70    3.90
  -7  -1   8    4.70    6.50
   8  -1   8   83.99    8.70
   8   1  -8   47.70    7.40
   8  -1  -8   64.49    8.50
   8   1   8   66.49    7.60
   9   1  -8    1.90    4.40
   9  -1   8   -0.60    3.90
   9   1   8    0.20    3.40
   9  -1  -8    4.90    4.50
   0   2   8  125.69    6.90
   0  -2  -8  128.29    7.30
   0   2   8  112.19    8.00
   0  -2   8  125.39    5.70
   0  -2   8  120.39    7.20
   1  -2   8  645.94   25.30
  -1   2   8  653.13   28.60
   1  -2   8  706.43   26.60
  -1   2   8  623.54   30.10
   1   2   8  691.53   25.50
  -1  -2   8  657.93   28.00
   1  -2  -8  665.43   27.30
  -1  -2   8  651.73   27.00
   1   2   8  692.63   27.10
  -2   2   8  324.07   19.40
  -2  -2  -8  369.36   14.40
   2  -2   8  339.67   14.50
   2  -2   8  365.96   15.20
  -2   2   8  321.97   17.70
  -2  -2   8  358.36   17.80
   2   2   8  342.77   14.80
   2  -2  -8  358.96   16.60
   2   2   8  364.96   14.90
  -2  -2   8  349.77   16.60
   3  -2   8   29.20    3.30
  -3   2   8   23.20    5.80
   3  -2   8   36.60    3.70
  -3  -2  -8   39.80    2.30
  -3   2   8   34.80    6.40
   3  -2  -8   31.40    4.60
  -3  -2   8   35.80    5.50
  -3  -2   8   32.20    5.90
   3   2   8   37.00    3.30
   4  -2   8  169.48    8.60
   4  -2   8  159.68    9.00
  -4   2   8  153.38   14.20
   4  -2  -8  162.68   10.60
  -4  -2   8  147.09   12.10
   4   2   8  161.88    8.70
  -4  -2   8  149.79   11.20
   5   2  -8   41.30    4.60
   5  -2   8   33.10    4.60
   5   2  -8   27.90    4.30
  -5   2   8   25.70    8.00
  -5  -2   8   33.70    6.60
   5  -2  -8   43.10    5.60
  -5  -2   8   45.60    8.60
   5  -2  -8   37.40    5.50
   5   2   8   36.60    4.40
   6  -2   8  215.98   12.60
   6   2  -8  199.28   12.10
  -6  -2   8  213.78   17.50
   6  -2  -8  205.08   13.40
   6   2   8  199.88   11.60
   6  -2  -8  207.58   13.10
   7   2  -8  270.07   15.80
   7  -2   8  284.47   16.20
  -7   2   8  331.47   25.50
   7   2   8  292.17   15.40
   7  -2  -8  258.37   16.30
   8  -2   8   26.70    6.10
   8   2  -8   38.70    6.70
   8  -2  -8   29.50    7.00
   8   2   8   26.40    5.60
   9  -2   8   89.09   10.10
   9  -2  -8  106.89   11.40
   9   2   8   92.69    9.40
   0  -3   8  228.38    9.00
   0   3   8  217.58   11.80
   0  -3  -8  203.98   10.80
   0  -3   8  208.68   10.80
  -1   3   8    3.50    3.60
   1  -3   8    6.40    2.20
   1  -3   8    4.60    1.40
  -1  -3  -8    6.20    2.20
  -1  -3   8    2.20    2.10
   1   3   8    4.90    1.40
  -1  -3   8    4.70    2.70
  -2   3   8  872.11   39.50
   2  -3   8  854.31   32.60
  -2  -3  -8  860.61   32.50
   2  -3   8  883.71   34.00
   2   3   8  871.61   32.90
  -2  -3   8  848.52   35.00
  -2  -3   8  846.12   34.60
   2  -3  -8  850.51   35.20
  -3  -3  -8  150.88    6.20
  -3   3   8  127.49   12.60
   3  -3   8  139.89    7.80
   3  -3   8  128.69    8.10
   3  -3  -8  135.69    9.50
  -3  -3   8  126.49    9.90
  -3  -3   8  144.39    9.40
   3   3   8  140.19    7.60
   4   3  -8  164.98    8.50
   4  -3   8  159.78    9.00
  -4   3   8  155.18   14.10
   4  -3   8  153.18    9.00
   4   3   8  143.59    8.40
   4  -3  -8  156.78   10.90
  -4  -3   8  155.48   11.60
  -4  -3   8  160.48   11.10
   5  -3   8  112.79   11.40
   5   3  -8  156.78    8.90
  -5   3   8  149.49   14.80
   5  -3   8  138.99    9.20
  -5  -3   8  143.99   12.50
   5   3   8  139.49    8.50
  -5  -3   8  133.19   11.20
   5  -3  -8  125.79    9.30
   5  -3  -8  134.59   10.50
   6   3  -8    9.80    3.30
   6  -3   8   12.60    3.60
  -6   3   8   16.30    7.40
   6  -3  -8   10.50    4.00
   6   3   8   11.50    3.30
   6  -3  -8   17.70    4.40
   7   3  -8   38.40    6.20
  -7   3   8   28.00   10.30
   7  -3   8   42.70    6.90
   7   3   8   26.00    4.90
   7  -3  -8   38.00    7.10
  -8   3   8    8.20    8.70
   8  -3   8   11.40    4.30
   8  -3  -8    3.30    3.70
   8   3   8    6.70    3.70
   0  -4   8  450.85   20.30
   0  -4   8  485.35   17.90
   0  -4  -8  467.35   20.60
   1  -4   8  225.68    9.40
   1  -4   8  210.18   11.30
  -1   4   8  228.48   15.10
  -1  -4  -8  217.28   11.00
  -1  -4   8  212.08   11.30
   1  -4  -8  210.18   11.70
   1   4   8  218.38    9.60
  -1  -4   8  200.98   10.70
  -2   4   8  184.98   14.60
   2  -4   8  190.48   10.50
   2  -4   8  188.58    8.90
  -2  -4  -8  192.38    9.20
  -2  -4   8  183.18   10.60
   2   4   8  192.78    9.00
   2  -4  -8  192.38   11.50
  -2  -4   8  181.68   10.20
   3   4  -8    8.20    1.80
  -3   4   8   12.60    5.90
   3  -4   8    8.30    2.30
   3  -4  -8    1.60    3.00
  -3  -4   8    8.10    3.10
  -3  -4   8    9.90    3.20
   3   4   8    6.10    1.90
  -4   4   8    9.80    6.20
   4  -4   8   12.20    3.40
   4  -4   8   14.10    3.30
   4   4  -8    7.30    2.10
   4   4   8    8.10    2.40
  -4  -4   8   11.20    4.30
  -4  -4   8   12.90    4.10
   5   4  -8  200.38   10.50
  -5   4   8  194.58   17.50
   5  -4   8  177.98   11.00
   5  -4   8  186.28   11.20
   5  -4  -8  202.98   13.30
   5   4   8  177.18   10.10
   5  -4  -8  174.38   11.60
  -5  -4   8  184.18   13.90
  -5  -4   8  180.58   12.70
   6  -4   8   64.99    7.00
  -6   4   8   72.19   13.70
   6  -4  -8   61.59    8.40
   6  -4  -8   81.99    8.30
   6   4   8   69.49    6.20
  -7   4   8   45.00   12.10
   7  -4   8   38.60    6.60
   7  -4  -8   26.00    6.00
   7  -4  -8   49.40   11.20
  -8   4   8   55.59   14.80
   8  -4  -8   20.90    6.50
   8   4   8   24.20    5.30
   0  -5   8  256.07   13.30
   0  -5  -8  270.47   13.50
   0   5   8  240.68   15.40
  -1  -5  -8  101.99    6.90
   1  -5   8  107.09    7.70
  -1   5   8  102.69   10.30
   1  -5   8  100.79    5.20
  -1  -5   8   99.59    6.00
   1  -5  -8  104.99    8.00
  -1  -5   8  111.79    7.40
  -2  -5  -8   17.20    3.10
  -2   5   8   15.70    6.20
   2  -5   8   15.80    2.40
   2  -5   8   13.90    3.30
  -2  -5   8   18.90    3.80
  -2  -5   8   21.20    3.10
   2  -5  -8   11.60    3.80
   2   5   8   18.40    2.40
   3   5  -8  150.48    8.20
   3  -5   8  139.89    9.70
   3  -5   8  152.48    8.50
   3   5   8  162.08    8.20
   3  -5  -8  154.68   11.10
  -3  -5   8  149.19    9.90
  -4   5   8   94.59   13.00
   4  -5   8  101.59    7.40
   4  -5   8   99.29    8.10
   4   5   8  113.59    6.90
  -4  -5   8  100.09    8.50
   4  -5  -8  105.99    9.60
   5  -5   8  188.18   11.30
   5  -5   8  183.58   11.70
  -5   5   8  180.88   18.40
   5   5   8  165.78    9.90
   5  -5  -8  203.08   13.80
   6  -5   8   46.30    6.30
  -6   5   8   54.49   12.30
   6  -5  -8   53.39    8.10
   6   5   8   45.50    5.40
   6  -5  -8   46.80    6.30
  -7   5   8   60.69   14.00
   7  -5   8   30.40    5.90
   7  -5  -8   38.10    7.80
   7  -5  -8   38.90    7.10
  -8   5   8  170.18   22.00
   8  -5   8  173.98   13.10
   8  -5  -8  125.59   12.90
   0  -6   8  395.26   14.30
   0  -6  -8  344.27   18.00
   0  -6   8  357.36   18.10
   0   6   8  371.56   21.00
  -1  -6  -8  116.79    7.90
  -1   6   8  116.69   11.20
   1  -6   8  109.79    5.60
   1  -6   8  108.19    8.40
   1   6   8  111.09    8.50
  -1  -6   8  116.99    8.30
   1  -6  -8  115.19    8.90
   2  -6   8  137.29    7.10
   2  -6   8  129.79    9.50
  -2   6   8  139.89   13.20
  -2  -6  -8  138.29    8.40
   2  -6  -8  125.39   10.10
   2   6   8  140.89    7.00
  -2  -6   8  128.39    9.00
   3  -6   8  108.29    9.10
   3  -6   8  120.09    7.40
  -3   6   8  147.79   14.50
   3   6   8  117.89    6.80
  -3  -6   8  124.09    9.00
   3  -6  -8  146.69   10.90
   4  -6   8  354.56   16.20
  -4   6   8  338.57   24.20
   4  -6   8  334.07   17.80
  -4  -6   8  310.97   17.40
   4   6   8  322.77   15.00
   4  -6  -8  331.77   19.10
   5  -6   8  157.28   11.50
   5  -6   8  186.88   10.90
  -5   6   8  159.48   18.00
   5  -6  -8  179.48   13.60
   5   6   8  150.28    9.30
   5  -6  -8  180.88   12.00
  -6   6   8  126.09   17.30
   6  -6  -8  106.89   10.20
   6   6   8  119.59    8.20
   6  -6  -8  116.69   11.70
   7  -6   8  177.58   12.70
  -7   6   8  192.28   22.30
   7  -6  -8  145.69   13.60
   7  -6  -8  171.18   13.80
  -8   6   8   27.20   12.00
   8  -6   8   20.80    5.90
   8  -6  -8   31.60    7.60
   0  -7  -8  212.08   12.40
   0  -7   8  185.08   11.90
   0   7   8  178.08   13.70
   1  -7   8  229.38   13.50
  -1   7   8  212.88   15.90
  -1  -7  -8  232.28   12.80
  -1  -7   8  203.38   12.60
   1  -7  -8  236.48   14.20
   1   7   8  212.58   14.10
  -2   7   8  366.76   23.20
   2  -7   8  384.96   19.20
  -2  -7  -8  362.46   17.40
   2  -7   8  363.16   15.50
   2   7   8  365.16   16.70
   2  -7  -8  352.76   19.60
  -2  -7   8  369.86   18.50
   3  -7   8   61.99    7.30
  -3   7   8   79.19   11.50
   3  -7   8   67.89    5.50
   3  -7  -8   77.69    8.70
  -3  -7   8   75.59    7.60
   3   7   8   63.69    4.60
   4  -7   8   52.39    7.40
  -4   7   8   70.69   13.00
  -4  -7   8   55.19    6.80
   4  -7  -8   53.89    8.90
   4   7   8   45.00    4.20
   5  -7   8   43.20    7.40
  -5   7   8   45.80   12.30
   5  -7   8   35.80    5.50
   5  -7  -8   48.60    6.60
   5  -7  -8   50.19    8.70
   6  -7   8   95.99    8.70
   6  -7  -8  111.39   12.30
   6  -7  -8   98.79   10.00
   7  -7   8    9.30    4.40
  -7   7   8   12.60    8.90
   7  -7  -8   20.10    7.20
   7  -7  -8   16.00    5.20
   0  -8   8   -1.50    2.80
   0   8   8    1.20    4.20
  -1  -8  -8   -0.40    2.60
  -1   8   8   -1.20    3.50
   1  -8   8    5.70    3.50
   1   8   8    1.50    3.00
   1  -8  -8    1.40    3.50
  -1  -8   8    4.60    3.30
  -2   8   8  299.07   20.90
   2  -8   8  286.87   17.20
  -2  -8  -8  301.67   16.00
   2   8   8  311.87   17.30
   2  -8  -8  337.17   19.00
  -2  -8   8  320.57   17.00
   3  -8   8    4.10    2.30
  -3   8   8   -5.80    4.50
   3  -8   8   -1.20    3.30
  -3  -8   8    7.10    3.50
   3  -8  -8    0.40    4.00
   4  -8   8    6.10    4.20
  -4   8   8    7.00    7.00
   4  -8   8    4.40    2.60
   4  -8  -8    4.30    4.40
   4  -8  -8    5.70    3.60
  -4  -8   8    7.20    4.00
   5  -8   8   65.39    8.70
   5  -8   8   75.69    7.20
  -5   8   8   74.19   14.50
   5  -8  -8   67.39   10.60
   5  -8  -8   74.29    8.10
   6  -8   8   99.49   11.20
   6  -8   8  113.39    9.60
  -6   8   8  143.89   19.30
   6  -8  -8  113.99   10.90
   6  -8  -8  100.49   12.10
   7  -8   8   15.70    5.20
  -7   8   8   21.50    9.90
   7  -8  -8   15.40    7.20
   7  -8  -8   25.50    6.90
   0  -9   8   13.10    4.60
   0   9   8   21.40    6.20
   0  -9  -8    9.20    4.50
  -1   9   8  529.65   30.40
   1  -9   8  553.74   28.20
  -1  -9  -8  620.34   28.00
  -1  -9   8  611.14   28.30
   1  -9  -8  618.54   29.60
   2  -9   8    5.30    4.30
  -2  -9  -8    1.10    3.20
  -2   9   8    5.20    5.30
   2  -9  -8    4.30    4.60
  -2  -9   8    5.90    3.90
  -3   9   8  187.88   17.40
   3  -9   8  190.88   14.20
  -3  -9   8  167.28   12.40
   3  -9  -8  205.68   15.50
   4  -9   8   68.89    9.00
  -4   9   8   64.89   12.80
   4  -9  -8   44.30    8.90
  -4  -9   8   55.09    7.70
   4  -9  -8   71.49    7.60
   5  -9   8   50.69    8.70
   5  -9   8   51.59    6.40
  -5   9   8   84.29   15.60
   5  -9  -8   62.09    9.30
   5  -9  -8   54.19    7.60
  -6   9   8   66.49   15.40
   6  -9   8   48.20    6.90
   6  -9   8   47.70    9.10
   6  -9  -8   53.49   10.50
   6  -9  -8   68.39    8.80
  -7   9   8   43.40   14.40
   7  -9   8   71.39    8.40
   7  -9  -8   49.20   11.40
   7  -9  -8   51.19    9.50
   0 -10   8   51.99    7.80
   0 -10  -8   52.39    8.50
  -1 -10  -8  117.49   10.60
   1 -10   8  126.79   11.50
  -1 -10   8  107.49   10.40
   1 -10  -8  124.79   11.90
  -2  10   8  114.49   13.30
   2 -10   8  104.89   10.70
  -2 -10  -8   96.69   11.10
  -2 -10   8  109.99   10.30
   2 -10  -8   80.29   10.50
   3 -10   8    0.70    4.40
  -3  10   8   -2.10    4.90
   3 -10  -8   -0.60    3.10
   3 -10  -8   -3.20    4.30
  -3 -10   8   -1.30    3.40
  -4  10   8  186.88   19.10
   4 -10  -8  204.78   13.50
   5 -10   8   -7.60    4.40
  -5  10   8    1.10    6.50
   5 -10  -8   -8.80    4.80
   5 -10  -8   -5.20    2.80
   6 -10   8    5.90    5.10
  -6  10   8    4.30    9.00
   6 -10  -8    7.30    6.50
   6 -10  -8    7.80    4.80
   0 -11  -8   84.19   10.30
   0 -11   8   80.69    9.80
  -1 -11  -8  106.49   10.80
   1 -11   8  128.89   12.50
  -1 -11   8  123.09   11.60
   1 -11  -8  153.08   13.50
   2 -11   8  117.39   11.80
  -2 -11   8   95.59   10.10
   2 -11  -8   98.89   11.80
   3 -11   8   80.29   10.90
  -3 -11   8   92.69   10.30
   3 -11  -8   82.29   10.60
   4 -11   8   27.80    7.80
  -4  11   8   24.50    9.80
   4 -11  -8   32.70    8.90
   5 -11   8   43.70    9.20
  -5  11   8   40.20   12.50
   5 -11  -8   32.10    8.80
   5 -11  -8   36.60    7.30
   0 -12   8   70.69    9.90
   0 -12  -8   70.19   10.10
  -1 -12  -8   12.30    6.00
   1 -12   8   15.50    6.80
  -1 -12   8    5.60    4.70
   1 -12  -8    4.90    5.70
   2 -12   8  367.36   23.70
  -2 -12   8  369.96   22.60
   2 -12  -8  445.86   26.40
   3 -12   8    7.80    5.80
  -3 -12   8   13.00    5.60
   3 -12  -8    7.70    6.90
   4 -12   8    4.30    5.50
   4 -12  -8    3.60    7.10
   5 -12   8   -5.30    4.30
   5 -12  -8   -6.70    6.20
   0 -13  -8    3.70    5.40
   0 -13   8   10.70    6.20
  -1 -13  -8  102.49   11.80
   1 -13   8   88.39   12.00
  -1 -13   8   84.49   10.80
   1 -13  -8  111.09   13.20
   2 -13   8   34.00    9.80
  -2 -13   8   22.80    7.10
   3 -13   8  108.89   13.40
   3 -13  -8  125.99   14.90
   0 -14  -8  180.68   16.40
   0 -14   8  211.08   17.80
   1 -14   8   32.20    8.80
   1 -14  -8   28.00    8.60
   2 -14   8   -0.50    6.00
  -2 -14   8    1.60    5.50
   2 -14  -8   -4.20    5.80
   0   0   9   -0.50    0.90
   0   0   9    0.40    2.10
  -1   0   9  664.93   29.50
   1   0   9  639.24   25.30
   1   0   9  659.13   26.20
  -1   0   9  678.73   27.80
   2   0   9  359.06   14.60
   2   0   9  326.47   14.30
  -2   0   9  327.47   17.10
  -2   0   9  354.66   19.30
   3   0  -9   48.70    5.30
  -3   0   9   50.79    7.70
   3   0   9   51.19    4.30
  -3   0   9   53.69    6.80
   3   0   9   55.19    3.80
   4   0  -9  680.73   28.80
  -4   0   9  665.03   31.10
   4   0   9  659.23   26.70
  -4   0   9  629.64   32.70
   5   0  -9    9.80    3.10
   5   0   9   12.60    3.10
  -5   0   9   14.70    5.40
   5   0  -9   11.20    3.90
  -5   0   9    6.00    5.90
   6   0  -9   16.90    4.90
  -6   0   9   30.40    9.40
   6   0  -9   15.30    4.20
   6   0   9   17.20    3.60
  -7   0   9  217.78   19.80
   7   0  -9  195.98   13.00
   7   0   9  173.28   11.80
   8   0  -9  118.09   10.50
   8   0   9   92.19    9.20
   9   0  -9    9.50    4.80
   9   0   9    5.30    3.90
   0  -1   9 1038.70   38.60
   0  -1   9 1056.09   40.50
   0   1   9 1025.10   41.10
   0   1   9 1076.49   39.20
   1  -1   9  588.64   22.60
   1  -1   9  619.64   23.60
  -1   1   9  582.44   27.30
  -1   1   9  594.34   25.60
   1   1   9  576.04   23.70
  -1  -1   9  600.54   24.60
   1  -1  -9  571.54   24.10
  -1  -1   9  533.75   25.60
   1   1   9  558.54   22.50
  -2   1   9   28.60    6.40
  -2   1   9   30.80    5.30
   2  -1   9   33.40    3.20
   2  -1   9   31.40    3.10
   2   1   9   33.70    3.30
  -2  -1   9   31.70    6.20
  -2  -1   9   33.00    5.30
   2   1   9   28.10    3.20
   2  -1  -9   28.70    3.90
  -3   1   9   15.90    5.70
   3  -1   9   24.40    2.70
   3  -1   9   30.90    3.00
  -3   1   9   36.80    6.40
   3  -1  -9   20.90    4.20
  -3  -1   9   23.40    5.70
   3   1   9   21.50    2.60
  -3  -1   9   24.80    4.90
   4  -1   9   83.39    5.70
  -4   1   9   79.09    8.60
   4   1  -9   84.99    6.90
  -4   1   9   63.49    9.70
   4   1   9   64.19    5.30
   4  -1  -9   71.19    7.10
  -4  -1   9   77.99    9.30
  -4  -1   9   90.49    8.60
   5   1  -9  100.29    7.40
   5   1  -9   90.09    7.90
   5  -1   9  107.19    7.20
  -5   1   9  110.09   13.20
   5   1   9   98.59    7.00
  -5  -1   9   94.39   11.40
   5  -1  -9   90.09    8.20
  -5  -1   9  108.09   10.90
   6   1  -9  125.09    9.10
   6   1  -9  106.49    8.90
  -6   1   9  102.89   14.20
   6  -1   9  120.89    8.70
   6   1   9  105.79    8.20
  -6  -1   9  110.89   13.50
   6  -1  -9  115.49    9.20
   6  -1  -9  118.29    9.70
   7   1  -9  117.19   10.00
  -7   1   9  147.69   16.90
   7  -1   9  144.69   10.50
  -7  -1   9  124.19   15.30
   7  -1  -9  152.18   11.40
   7   1   9  135.69    9.90
   8   1  -9   16.80    5.10
   8   1   9   23.20    5.20
   8  -1  -9   35.40    7.10
   9  -1   9   67.59    8.70
   9   1  -9   61.29    8.50
   9   1   9   58.69    8.00
   9  -1  -9   56.09    8.40
   0  -2   9    1.10    1.90
   0  -2  -9    2.30    2.00
   0   2   9    4.40    1.60
   0   2   9    1.80    2.60
  -1  -2  -9  609.44   24.00
   1  -2   9  588.24   24.30
   1  -2   9  596.84   23.20
  -1   2   9  562.14   28.30
  -1   2   9  638.04   27.10
  -1  -2   9  643.24   26.50
   1   2   9  613.64   25.20
  -1  -2   9  603.74   25.20
   1  -2  -9  573.84   25.00
   1   2   9  593.74   23.30
   2  -2   9  359.36   15.60
  -2   2   9  391.06   21.40
   2  -2   9  338.87   14.90
  -2   2   9  356.46   18.70
  -2  -2  -9  387.56   15.00
  -2  -2   9  345.37   17.10
   2  -2  -9  342.87   16.90
   2   2   9  357.06   15.50
  -2  -2   9  374.96   18.60
   2   2   9  351.16   15.20
  -3   2   9  134.59   12.70
  -3  -2  -9  148.09    6.40
   3  -2   9  139.29    7.80
  -3   2   9  127.59   10.60
   3  -2   9  136.49    7.60
   3  -2  -9  139.29    9.50
  -3  -2   9  137.79   10.80
   3   2   9  144.79    7.80
  -3  -2   9  146.09   10.10
   4  -2   9   74.59    5.40
   4  -2   9   88.59    6.20
  -4   2   9  107.29   11.80
  -4  -2   9   72.89    8.80
  -4  -2   9   77.29    8.10
   4   2   9   89.79    6.10
   4  -2  -9   99.69    8.20
   5   2  -9  198.78   11.70
   5   2  -9  174.68   10.40
   5  -2   9  195.58   10.80
  -5   2   9  184.28   16.90
   5   2   9  194.18   10.50
   5  -2  -9  185.08   12.40
  -5  -2   9  195.28   14.00
   5  -2  -9  174.68   11.60
  -5  -2   9  172.08   14.60
   6   2  -9   77.59    7.20
   6  -2   9   69.79    6.70
   6  -2  -9   79.39    8.20
  -6  -2   9   95.79   12.10
   6  -2  -9   88.39    8.20
   6   2   9   84.59    7.00
   7  -2   9   45.60    6.60
  -7   2   9   26.10   10.20
   7   2  -9   44.80    6.80
   7   2   9   53.79    6.30
   7  -2  -9   47.90    7.10
  -8   2   9   15.90    9.50
   8  -2   9   12.50    4.70
   8   2  -9    9.30    4.30
   8  -2  -9   18.50    5.80
   8   2   9    7.30    4.00
   0   3   9  264.57   14.10
   0   3   9  280.07   14.10
   0  -3   9  263.07   10.80
   0  -3  -9  273.57   13.00
   0  -3   9  237.68   12.50
   1  -3   9  412.96   16.40
  -1  -3  -9  430.36   17.80
   1  -3   9  419.76   18.20
  -1   3   9  418.96   22.50
  -1  -3   9  395.76   18.80
  -1  -3   9  375.86   18.20
   1   3   9  416.26   16.60
   2  -3   9  142.49    8.20
  -2   3   9  159.58   12.80
  -2  -3  -9  145.19    7.30
   2  -3   9  129.99    7.00
   2  -3  -9  133.79    9.10
   2   3   9  146.09    7.50
  -2  -3   9  142.29    9.80
  -2  -3   9  137.59    9.00
  -3   3   9  181.18   14.50
   3  -3   9  181.58    9.70
   3  -3   9  167.18    8.80
   3  -3  -9  173.38   10.90
  -3  -3   9  179.08   10.90
  -3  -3   9  158.08   11.40
   3   3   9  161.38    8.80
   4   3  -9   53.69    4.70
   4  -3   9   59.89    5.00
  -4   3   9   66.99   11.40
   4  -3   9   66.09    5.30
   4   3   9   64.29    5.20
  -4  -3   9   55.79    7.90
  -4  -3   9   54.99    7.30
   4  -3  -9   66.29    7.10
   5  -3   9   38.20    5.10
  -5   3   9   49.50   10.50
   5   3  -9   45.50    4.70
   5  -3  -9   39.00    6.60
  -5  -3   9   39.90    7.20
  -5  -3   9   33.60    7.50
   5   3   9   44.70    4.70
   6   3  -9  100.49    7.70
   6  -3   9   98.39    8.20
  -6   3   9  102.99   14.50
   6  -3  -9  115.39    9.20
   6   3   9   78.39    7.00
  -6  -3   9   92.49   11.30
   6  -3  -9   83.99    8.90
   7   3  -9   91.49    8.40
   7  -3   9   85.19    8.50
  -7   3   9  111.29   16.20
   7  -3  -9   72.09    8.60
   7   3   9   87.69    7.70
   8  -3   9   -4.00    3.30
  -8   3   9    7.20    8.80
   8  -3  -9    1.20    3.90
   8   3   9   -3.10    2.70
   0   4   9   62.99    7.00
   0  -4  -9   65.69    5.90
   0  -4   9   63.29    5.30
  -1  -4  -9  114.19    7.30
   1  -4   9  128.59    7.90
  -1   4   9  105.39   10.80
  -1  -4   9  111.59    7.70
   1   4   9  120.89    6.20
   1  -4  -9  105.39    8.00
  -1  -4   9  105.89    7.60
  -2   4   9   40.90    7.70
   2  -4   9   25.60    3.90
   2  -4   9   27.50    2.90
  -2  -4  -9   28.00    3.40
   2  -4  -9   32.40    4.50
  -2  -4   9   37.50    4.60
  -2  -4   9   18.70    4.10
   2   4   9   26.80    2.90
  -3   4   9  190.98   15.50
   3  -4   9  184.98   10.50
   3  -4   9  163.58    9.10
   3  -4  -9  179.58   11.60
  -3  -4   9  187.28   11.50
   3   4   9  197.38    9.50
  -3  -4   9  167.18   11.00
   4  -4   9  122.29    8.30
   4   4  -9  114.29    6.90
   4  -4   9  126.29    7.90
  -4  -4   9  102.39    9.50
  -4  -4   9  118.29    9.70
   4  -4  -9  125.89    9.70
   4   4   9  119.59    7.40
  -5   4   9   86.49   12.00
   5  -4   9   74.99    6.70
   5  -4   9   62.39    6.30
   5   4  -9   69.59    5.70
   5   4   9   57.49    5.50
   5  -4  -9   63.19    7.90
  -5  -4   9   62.59    8.00
   6  -4   9   18.50    4.50
  -6   4   9   24.50    8.50
   6   4   9   18.10    3.90
   6  -4  -9   13.10    4.00
   6  -4  -9   20.50    5.90
   7  -4   9   18.70    5.20
  -7   4   9   12.50    8.80
   7  -4  -9   12.80    5.60
   7  -4  -9   25.80    6.40
   7   4   9   20.80    4.60
   8  -4   9   22.40    6.00
  -8   4   9   16.50    9.00
   8  -4  -9   18.00    6.00
   8   4   9   25.60    5.40
   0  -5   9  247.48   13.30
   0   5   9  263.27   16.20
   0  -5  -9  269.47   13.80
  -1  -5  -9   54.99    5.00
  -1   5   9   38.10    7.60
   1  -5   9   45.80    3.30
  -1  -5   9   38.00    4.50
   1  -5  -9   46.70    5.70
  -1  -5   9   46.90    4.50
   1   5   9   48.60    4.50
   2  -5   9   80.09    4.90
  -2   5   9   73.09   10.20
   2  -5   9   66.59    6.40
  -2  -5  -9   70.09    5.40
   2  -5  -9   71.29    7.30
  -2  -5   9   73.69    5.70
   2   5   9   76.49    4.80
  -3   5   9  247.58   18.60
   3  -5   9  229.98   12.80
   3  -5   9  231.78   11.20
   3  -5  -9  214.68   13.90
  -3  -5   9  212.98   12.80
   3   5   9  211.98   10.70
   4  -5   9   54.79    5.50
   4  -5   9   57.89    6.50
  -4   5   9   77.69   13.40
   4  -5  -9   57.79    7.60
   4   5   9   62.89    5.10
  -4  -5   9   68.39    7.40
  -5   5   9    7.20    7.30
   5  -5   9    9.00    3.10
   5  -5   9   11.00    3.20
  -5  -5   9    2.60    3.70
   5   5   9    9.10    3.00
   5  -5  -9    6.50    3.80
   5  -5  -9   11.00    4.80
  -6   5   9   44.10   11.90
   6  -5   9   31.40    5.60
   6   5   9   43.20    5.50
   6  -5  -9   51.59    8.50
   6  -5  -9   48.30    7.00
   7  -5   9   11.90    4.70
  -7   5   9   10.80    9.40
   7  -5  -9   16.60    5.50
   7  -5  -9   14.70    5.70
   7   5   9   12.30    3.90
   8  -5   9    6.30    4.10
  -8   5   9   -1.50    6.30
   8  -5  -9    5.90    4.00
   0  -6   9   59.19    5.70
   0  -6  -9   52.49    5.90
   0  -6   9   52.09    3.00
   1  -6   9  155.98    7.10
  -1  -6  -9  127.89    8.90
   1  -6   9  148.79    9.90
  -1   6   9  156.28   13.20
   1   6   9  131.89    9.90
  -1  -6   9  141.09    9.60
   1  -6  -9  140.09   10.10
  -2   6   9   48.60    9.60
   2  -6   9   31.90    3.30
  -2  -6  -9   30.20    4.30
   2  -6  -9   26.90    5.40
   2   6   9   28.50    2.90
  -3   6   9  317.07   22.60
   3  -6   9  331.07   17.20
   3  -6   9  315.27   14.70
  -3  -6   9  327.07   17.00
   3  -6  -9  323.77   18.10
   4  -6   9  251.77   12.70
   4  -6   9  256.57   14.60
  -4   6   9  235.28   20.20
  -4  -6   9  217.48   14.00
   4  -6  -9  236.68   15.90
   4   6   9  229.58   11.80
   5  -6   9   42.40    5.60
  -5   6   9   75.99   14.00
   5  -6   9   44.80    6.70
   5  -6  -9   53.59    8.00
   5   6   9   49.50    5.00
   5  -6  -9   61.69    7.40
   6  -6   9   36.10    6.00
  -6   6   9   34.40   11.60
   6   6   9   33.40    5.00
   6  -6  -9   25.20    6.50
   6  -6  -9   26.10    5.80
  -7   6   9   39.70   12.00
   7  -6   9   19.80    5.30
   7  -6  -9   24.20    6.40
   7  -6  -9   11.40    5.70
   8  -6   9   93.59    9.90
   8  -6  -9   78.49   10.40
   0  -7   9  286.07   15.50
   0   7   9  243.98   17.30
   0  -7  -9  283.17   15.60
  -1  -7  -9   21.40    4.50
  -1   7   9   21.70    6.50
   1  -7   9   24.40    5.20
   1  -7  -9   15.90    4.60
  -1  -7   9   18.50    4.60
   1   7   9   27.90    5.80
  -2  -7  -9  306.57   16.10
   2  -7   9  360.56   18.30
  -2   7   9  356.46   22.80
   2  -7   9  318.17   14.20
   2   7   9  336.47   15.90
  -2  -7   9  351.56   17.70
   2  -7  -9  346.47   19.00
   3  -7   9   80.49    8.20
   3  -7   9   73.69    5.70
  -3   7   9   61.59   11.60
  -3  -7   9   78.79    8.00
   3   7   9   78.09    5.10
   3  -7  -9   85.19    9.40
   4  -7   9   95.99    9.10
   4  -7   9   96.59    7.20
  -4   7   9   89.19   13.70
   4   7   9   88.59    6.20
  -4  -7   9   75.49    8.00
   4  -7  -9  103.39   10.50
   5  -7   9   27.30    5.00
  -5   7   9   43.30   12.20
   5  -7   9   20.90    5.40
   5  -7  -9   38.60    6.80
   5  -7  -9   38.10    7.90
  -6   7   9  132.39   18.50
   6  -7  -9  143.79   13.20
  -7   7   9   17.00   10.70
   7  -7   9   27.00    6.30
   7  -7  -9   13.70    6.20
   0   8   9   82.39   10.40
   0  -8   9  101.89    9.10
   0  -8  -9  104.09    9.10
  -1  -8  -9  100.29    8.80
   1  -8   9  117.39    9.50
  -1   8   9  111.19   11.80
   1  -8  -9  124.29   10.50
  -1  -8   9  108.99    9.20
   1   8   9  111.69   10.90
  -2  -8  -9  234.98   13.00
  -2   8   9  192.18   17.00
   2  -8   9  216.48   14.20
  -2  -8   9  216.18   13.60
   3  -8   9  476.05   24.50
   3  -8   9  456.25   20.30
  -3   8   9  486.95   29.90
   3  -8  -9  503.05   25.90
  -3  -8   9  495.05   23.90
   4  -8   9   17.50    3.80
  -4   8   9   27.40    9.00
   4  -8   9   24.30    6.10
  -4  -8   9   12.80    4.60
   4  -8  -9   15.10    6.00
  -5   8   9   32.10   10.80
   5  -8   9   34.00    5.50
   5  -8  -9   40.30    8.90
   5  -8  -9   25.80    5.70
   6  -8   9   51.79    7.00
  -6   8   9   79.09   17.00
   6  -8  -9   59.49    8.40
   6  -8  -9   79.89   11.20
   7  -8   9   54.59    7.80
  -7   8   9   56.49   15.90
   7  -8  -9   61.59   10.20
   7  -8  -9   44.70    9.90
   0   9   9   12.60    5.50
   0  -9   9   12.80    4.70
   0  -9  -9   17.40    5.50
  -1   9   9   81.89   11.10
  -1  -9  -9   79.49    8.70
   1  -9   9   68.49    8.50
   1  -9  -9   87.59    9.70
  -1  -9   9   86.49    8.60
   2  -9   9   40.10    7.10
  -2  -9  -9   42.00    6.30
  -2   9   9   23.10    8.00
   2  -9  -9   30.40    7.00
  -2  -9   9   37.10    6.50
  -3   9   9   75.49   13.60
   3  -9   9   73.99    9.10
   3  -9  -9   71.69    9.70
  -3  -9   9   57.89    7.60
  -4   9   9   18.10    9.00
  -4  -9   9   27.80    6.00
   4  -9  -9   26.30    7.00
   4  -9  -9   25.80    5.60
   5  -9   9  114.39   11.50
  -5   9   9  111.59   16.60
   5  -9   9   86.59    9.60
   5  -9  -9  102.39    9.90
   5  -9  -9  129.79   13.30
   6  -9   9   11.20    4.40
   6  -9   9   23.70    6.90
  -6   9   9   23.30   11.10
   6  -9  -9   13.70    5.60
   6  -9  -9    4.90    5.90
  -7   9   9  284.77   28.40
   7  -9   9  262.57   17.00
   7  -9  -9  244.38   20.30
   7  -9  -9  317.17   19.80
   0 -10   9    4.40    4.00
   0 -10  -9    2.40    4.10
   1 -10   9   88.59   10.10
  -1 -10  -9   96.69    9.70
  -1 -10   9  122.29   10.50
  -2  10   9   36.30    8.80
   2 -10   9   13.80    5.70
   2 -10  -9   35.60    7.90
  -2 -10   9   20.20    5.60
  -3  10   9  173.48   18.10
   3 -10   9  157.28   13.60
  -3 -10   9  162.78   12.60
   3 -10  -9  180.38   15.40
   4 -10   9   48.10    8.80
  -4  10   9   38.10   11.70
   4 -10  -9   36.10    6.60
   4 -10  -9   50.99   10.30
   5 -10   9  119.29   12.40
  -5  10   9  111.69   17.00
   5 -10  -9  116.29   10.90
   5 -10  -9  148.79   14.90
  -6  10   9   29.80   11.80
   6 -10  -9   35.20    9.90
   6 -10  -9   28.60    7.10
   0 -11  -9  460.25   25.00
   0 -11   9  385.86   23.50
  -1 -11  -9   -0.40    3.80
   1 -11   9   -1.10    4.10
  -1 -11   9   -2.60    2.80
   1 -11  -9   -1.10    3.50
   2 -11   9  107.89   11.80
   2 -11  -9   91.89   11.60
  -2 -11   9  112.19   10.80
   3 -11   9   25.00    7.20
   3 -11  -9   44.60    9.50
  -3 -11   9   20.20    6.10
   4 -11   9  244.88   18.10
  -4  11   9  231.18   22.40
   4 -11  -9  234.18   19.20
  -5  11   9   52.49   13.00
   5 -11   9   37.30    8.50
   5 -11  -9   36.10    9.60
   5 -11  -9   41.00    7.90
   0 -12  -9   42.30    8.50
   0 -12   9   38.60    7.90
   1 -12   9   86.89   11.00
  -1 -12  -9  101.89   10.70
  -1 -12   9  106.99   11.00
   1 -12  -9   79.09   11.20
   2 -12   9   62.79   10.80
   2 -12  -9   76.49   11.60
  -2 -12   9   45.90    8.60
   3 -12   9   66.09   11.10
  -3 -12   9   74.69    9.50
   3 -12  -9   66.79   11.90
   4 -12  -9   24.50    8.90
   0 -13   9   31.00    8.20
   0 -13  -9   41.70    9.20
  -1 -13  -9   80.89   10.60
   1 -13   9   61.29   11.20
  -1 -13   9   93.59   11.60
   1 -13  -9   50.49   10.40
   2 -13   9  111.09   13.30
  -2 -13   9  108.59   12.30
   2 -13  -9  101.29   13.90
   3 -13   9   -4.80    5.30
   3 -13  -9   -0.90    6.20
   0 -14  -9    5.30    5.90
   0 -14   9   -1.10    5.30
   1 -14   9   19.80    7.50
   1 -14  -9   30.80    9.10
  -1 -14   9   28.00    8.30
   0   0  10  698.13   28.30
   0   0  10  675.13   26.10
  -1   0  10 1584.74   65.39
   1   0  10 1689.83   62.19
  -1   0  10 1655.33   63.79
   1   0  10 1722.03   61.09
   2   0  10    8.70    2.40
  -2   0  10    6.20    3.00
  -2   0  10   12.90    4.50
   2   0  10    5.40    1.80
   3   0  10   44.30    3.70
   3   0  10   43.80    3.80
   3   0 -10   43.30    4.80
  -3   0  10   42.90    6.30
  -3   0  10   48.60    8.30
   4   0  10  386.26   17.10
  -4   0  10  402.46   23.50
  -4   0  10  355.16   21.00
   4   0 -10  396.46   19.30
  -5   0  10   23.20    6.10
   5   0  10   13.90    3.40
   5   0 -10   15.10    4.30
   5   0 -10   18.90    4.00
  -5   0  10   15.90    6.30
   6   0 -10   -3.90    2.80
   6   0 -10    1.10    2.80
   6   0  10    2.70    2.80
  -6   0  10    1.50    5.60
   7   0  10   94.09    8.30
   7   0 -10   72.99    8.30
  -7   0  10  116.59   15.10
   8   0 -10  146.09   12.10
   8   0  10  150.58   11.40
   0   1  10  138.39    9.10
   0  -1  10  141.79    6.80
   0   1  10  157.18    7.40
   0  -1  10  133.99    8.40
   1  -1  10  371.36   15.40
  -1   1  10  380.16   18.40
   1  -1  10  380.76   16.50
   1   1  10  372.46   16.80
  -1  -1  10  376.46   17.60
  -1  -1  10  368.86   18.90
   1   1  10  374.16   15.40
  -2   1  10  322.87   17.80
   2  -1  10  339.77   14.80
  -2   1  10  363.06   20.70
   2  -1 -10  355.66   16.70
   2   1  10  347.57   15.20
   2   1  10  361.56   15.10
  -2  -1  10  343.77   17.60
  -2  -1  10  354.06   19.40
  -3   1  10  443.76   25.00
   3  -1  10  440.46   19.10
  -3   1  10  466.55   23.60
   3  -1  10  471.35   19.00
   3   1  10  477.75   18.70
  -3  -1  10  442.16   22.30
   3   1  10  461.25   19.30
   3  -1 -10  462.15   21.30
  -3  -1  10  453.95   24.10
   4  -1  10   10.40    2.60
  -4   1  10   14.60    5.30
  -4   1  10   23.10    6.60
   4   1 -10   10.80    3.60
  -4  -1  10   25.00    5.70
   4   1  10   14.10    3.00
   4  -1 -10   18.60    4.40
  -4  -1  10   24.00    6.20
  -5   1  10  135.49   12.20
   5   1 -10  129.09    9.70
  -5   1  10  116.79   13.70
   5   1 -10  116.19    8.60
   5  -1  10  119.29    8.10
   5   1  10  137.59    8.60
   5  -1 -10  133.19   10.50
  -5  -1  10  141.39   12.60
  -5  -1  10  151.38   13.90
   6   1 -10  275.57   15.20
  -6   1  10  303.57   22.80
   6   1 -10  255.97   15.60
   6  -1  10  269.07   14.70
  -6  -1  10  301.97   21.80
   6   1  10  278.17   14.40
   6  -1 -10  294.97   15.90
  -6  -1  10  273.97   18.40
   6  -1 -10  263.97   16.10
   7   1 -10   16.40    4.60
  -7   1  10   22.00    9.60
   7  -1  10   28.40    5.60
   7  -1 -10   30.00    6.10
   7   1  10   14.20    4.20
  -7  -1  10   22.90    8.70
   8  -1  10  244.08   14.90
   8   1 -10  232.38   15.10
  -8   1  10  233.48   23.00
   8  -1 -10  205.58   15.10
   8   1  10  213.58   14.10
   0  -2 -10  318.57   15.50
   0   2  10  373.06   15.70
   0   2  10  347.77   17.10
   0  -2  10  332.47   15.70
   0  -2  10  341.27   13.80
  -1  -2 -10  131.49    7.30
   1  -2  10  126.49    7.50
  -1   2  10  113.19    8.80
   1  -2  10  119.69    6.20
  -1  -2  10  121.79    8.90
   1  -2 -10  114.59    7.50
  -1  -2  10  109.29    7.60
   1   2  10  111.39    6.20
   1   2  10  118.09    8.00
  -2   2  10    4.10    4.50
   2  -2  10    0.50    1.70
  -2  -2 -10   -0.40    1.60
   2  -2  10    0.50    1.40
  -2   2  10    2.40    3.00
   2  -2 -10    1.90    2.50
  -2  -2  10    1.10    2.30
   2   2  10    0.60    1.30
  -2  -2  10   -4.50    2.60
   2   2  10    1.60    1.80
  -3  -2 -10  334.97   13.40
   3  -2  10  322.67   14.70
   3  -2  10  315.17   14.40
  -3   2  10  334.87   18.90
  -3   2  10  357.16   21.70
   3  -2 -10  310.77   16.70
  -3  -2  10  325.37   18.50
   3   2  10  338.67   14.00
   3   2  10  332.17   14.80
  -3  -2  10  336.97   17.70
   4  -2  10   94.59    6.30
  -4   2  10   98.59   12.30
   4  -2  10  102.09    6.70
   4  -2 -10   98.29    8.60
  -4  -2  10  120.49   11.00
   4   2  10  117.69    7.20
  -4  -2  10   91.29    9.00
   5   2 -10  181.78   10.60
   5  -2  10  205.08   10.90
  -5   2  10  182.58   17.20
   5   2 -10  181.58   11.70
   5   2  10  179.38   10.50
  -5  -2  10  195.98   15.50
   5  -2 -10  171.78   12.40
   5  -2 -10  200.68   12.20
  -6   2  10   72.49   13.30
   6   2 -10   60.29    6.60
   6  -2  10   63.99    6.60
   6  -2 -10   53.39    6.10
   6   2  10   56.79    5.60
  -6  -2  10   54.49   11.30
   6  -2 -10   47.20    6.90
   7   2 -10   25.40    5.40
  -7   2  10   42.50   11.50
   7  -2  10   38.10    5.40
   7   2  10   30.60    5.40
   7  -2 -10   40.30    7.00
  -7  -2  10   34.60    9.40
   8   2 -10   54.79    7.90
  -8   2  10   64.19   14.70
   8  -2  10   68.09    8.00
   8   2  10   40.90    6.80
   8  -2 -10   56.79    8.40
   0  -3 -10   57.59    5.20
   0   3  10   49.30    5.90
   0   3  10   57.59    5.90
   0  -3  10   51.89    5.10
   0  -3  10   59.49    3.60
   1  -3  10 1163.38   42.30
   1  -3  10 1156.58   44.10
  -1  -3 -10 1154.28   43.60
  -1   3  10 1104.89   48.90
  -1   3  10 1117.79   46.50
  -1  -3  10 1146.29   45.20
  -1  -3  10 1138.59   44.60
   1   3  10 1143.89   42.40
   1  -3 -10 1093.19   44.60
   1   3  10 1134.99   44.80
   2  -3  10   79.59    5.10
  -2   3  10   83.79    8.00
   2  -3  10   78.79    6.00
  -2   3  10   83.59    9.60
  -2  -3 -10   79.29    5.30
  -2  -3  10   85.39    7.00
  -2  -3  10   77.79    7.50
   2   3  10   68.69    5.00
   2  -3 -10   86.29    7.30
  -3   3  10  195.98   15.80
   3  -3  10  187.78   10.40
  -3  -3  10  209.38   12.50
  -3  -3  10  200.28   13.20
   3  -3 -10  223.18   12.80
  -4   3  10  300.97   21.00
   4  -3  10  248.08   12.70
   4  -3  10  247.68   12.70
   4  -3 -10  267.97   15.30
  -4  -3  10  226.68   15.70
   4   3  10  266.97   12.80
  -4  -3  10  261.47   15.60
  -5   3  10  154.08   15.50
   5   3 -10  165.28    9.60
   5  -3  10  142.29    9.50
  -5  -3  10  175.28   14.50
   5   3  10  145.89    9.30
   5  -3 -10  149.69   11.60
  -5  -3  10  187.88   13.70
   6   3 -10   44.90    5.30
   6  -3  10   30.10    5.30
  -6   3  10   30.70   10.50
  -6  -3  10   51.59    9.80
   6  -3 -10   41.30    7.10
   6  -3 -10   46.00    6.20
   6   3  10   41.30    5.20
   7  -3  10   26.90    5.60
  -7   3  10   37.10   10.90
   7   3 -10   31.70    5.80
   7  -3 -10   30.30    6.10
   7  -3 -10   24.50    7.60
   7   3  10   30.60    5.40
   8  -3  10   37.20    7.00
  -8   3  10   21.80    9.30
   8  -3 -10   41.30    8.00
   8   3  10   39.00    6.40
   0  -4 -10  641.04   27.00
   0  -4  10  669.93   24.10
   0   4  10  594.24   28.90
   0  -4  10  616.34   26.70
   1  -4  10  227.58   11.80
   1  -4  10  208.88    9.60
  -1   4  10  204.28   15.40
  -1  -4 -10  209.38   11.30
   1  -4 -10  209.38   12.00
   1   4  10  212.98   10.00
  -1  -4  10  220.08   12.00
  -1  -4  10  223.08   11.90
  -2  -4 -10  630.84   25.50
   2  -4  10  640.84   24.90
  -2   4  10  635.74   32.60
   2  -4  10  656.43   26.90
   2   4  10  636.34   25.00
  -2  -4  10  599.04   27.20
  -2  -4  10  621.04   27.20
   2  -4 -10  628.74   28.00
   3  -4  10   58.59    5.90
   3  -4  10   66.89    5.10
  -3   4  10   77.89   10.20
  -3  -4  10   62.89    6.80
  -3  -4  10   56.49    6.60
   3   4  10   66.39    5.10
   3  -4 -10   72.89    7.50
  -4   4  10  442.26   27.00
   4  -4  10  364.86   18.00
   4   4 -10  397.86   16.70
   4  -4  10  370.66   17.20
   4  -4 -10  406.46   20.70
   4   4  10  352.86   17.00
  -4  -4  10  408.66   20.90
  -4  -4  10  354.26   20.00
  -5   4  10  258.57   21.30
   5  -4  10  213.98   13.20
   5  -4  10  204.98   12.40
   5   4 -10  241.98   12.30
   5  -4 -10  263.37   16.00
  -5  -4  10  251.07   15.90
   5   4  10  236.78   12.40
  -6   4  10    0.00    6.50
   6  -4  10    2.20    3.10
   6  -4 -10    2.90    3.30
   6   4  10    0.60    2.40
   6  -4 -10    2.40    3.90
   7  -4  10  162.08   11.50
  -7   4  10  141.69   19.30
   7   4  10  173.98   11.20
   7  -4 -10  155.68   13.20
   7  -4 -10  171.18   13.10
  -8   4  10   44.30   12.90
   8  -4  10   46.10    7.70
   8  -4 -10   34.80    7.50
   8   4  10   43.90    6.30
   0  -5 -10   54.69    5.70
   0   5  10   48.90    7.00
   0  -5  10   42.10    4.80
   0  -5  10   51.39    3.20
   1  -5  10  118.79    6.30
  -1   5  10  122.89   12.00
  -1  -5 -10  126.49    8.10
   1  -5  10  118.69    8.40
   1  -5 -10  123.49    8.80
   1   5  10  130.99    7.90
  -1  -5  10  135.89    8.30
  -1  -5  10  118.09    8.50
  -2   5  10  267.37   19.00
  -2  -5 -10  236.58   12.30
   2  -5  10  253.57   11.60
   2  -5  10  285.87   14.30
  -2  -5  10  242.48   15.00
  -2  -5  10  252.97   14.10
   2   5  10  267.17   11.70
   2  -5 -10  258.97   14.70
   3  -5  10  402.36   17.50
   3  -5  10  413.56   19.60
  -3   5  10  432.86   26.50
  -3  -5  10  389.06   19.90
   3  -5 -10  406.16   21.10
   3   5  10  396.16   17.40
  -4   5  10  285.17   21.50
   4  -5  10  264.77   12.80
   4  -5  10  233.48   13.80
   4  -5 -10  233.98   15.40
   4   5  10  237.58   12.20
  -4  -5  10  222.58   14.50
   5  -5  10  100.19    7.60
   5  -5  10   98.09    8.30
  -5   5  10  120.19   15.80
   5  -5 -10  110.99   10.50
  -5  -5  10   97.99   10.30
   6  -5  10   82.19    8.00
  -6   5  10  108.39   16.10
   6  -5 -10  103.59   10.70
   6   5  10   91.99    7.60
   6  -5 -10   93.29    9.30
  -7   5  10   22.60   10.10
   7  -5  10   15.30    4.90
   7  -5 -10   24.80    7.10
   7   5  10   18.80    4.30
   7  -5 -10   20.50    6.20
  -8   5  10   52.19   14.20
   8  -5  10   61.79    7.50
   8   5  10   45.50    7.30
   8  -5 -10   34.20    8.20
   0  -6  10    0.30    0.80
   0  -6 -10   -2.50    2.00
   0   6  10    3.40    3.90
   0  -6  10    1.60    2.50
   1  -6  10  196.28    8.80
  -1  -6 -10  195.88   11.30
   1  -6  10  195.38   12.00
  -1   6  10  199.88   15.60
   1  -6 -10  171.08   11.60
   1   6  10  180.08   12.10
  -1  -6  10  197.78   11.80
  -2   6  10  699.73   35.40
   2  -6  10  641.84   25.80
  -2  -6 -10  646.54   27.30
   2  -6  10  659.43   29.00
   2  -6 -10  677.83   30.30
  -2  -6  10  630.54   28.90
   2   6  10  661.63   26.00
   3  -6  10  148.19   10.60
   3  -6  10  143.49    8.30
  -3   6  10  144.49   15.60
   3  -6 -10  157.48   11.80
  -3  -6  10  138.09   10.40
   3   6  10  152.98    8.10
   4  -6  10   41.80    4.90
  -4   6  10   45.60   10.80
   4  -6 -10   38.60    7.20
   4   6  10   32.50    4.00
  -4  -6  10   45.50    6.60
   5  -6  10    1.60    3.10
  -5   6  10   -4.50    6.50
   5  -6  10    2.10    2.70
   5  -6 -10    7.00    5.00
   5   6  10    1.40    2.10
   5  -6 -10    1.80    3.40
   6  -6  10  100.49    8.70
  -6   6  10  116.49   16.80
   6   6  10   84.89    7.40
   6  -6 -10   85.89   10.50
   7  -6  10   -0.40    3.50
  -7   6  10   -0.40    8.30
   7  -6 -10    3.10    5.00
   7  -6 -10   -2.10    3.40
  -8   6  10   13.90   10.90
   8  -6  10   18.20    5.80
   8  -6 -10   16.00    5.60
   0   7  10    0.90    3.60
   0  -7 -10    4.90    3.30
   1  -7  10   88.89    8.30
  -1  -7 -10   82.29    7.50
  -1   7  10   79.19   10.60
   1  -7 -10   97.39    8.40
  -1  -7  10   86.49    7.60
   1   7  10   93.19    9.20
   2  -7  10   84.69    8.30
   2  -7  10   91.39    5.70
  -2  -7 -10   76.09    6.80
  -2   7  10   84.89   11.40
   2  -7 -10   87.89    8.80
  -2  -7  10   82.19    7.90
   2   7  10   87.69    6.70
   3  -7  10   30.20    4.00
   3  -7  10   30.90    5.90
  -3   7  10   36.40    9.70
   3   7  10   33.20    3.40
   3  -7 -10   20.30    5.80
  -3  -7  10   27.70    5.80
  -4   7  10   15.80    8.30
   4  -7  10    6.90    2.80
   4  -7  10   10.40    4.30
  -4  -7  10   14.30    4.80
   4   7  10    8.90    2.60
   4  -7 -10   20.30    6.40
  -5   7  10    2.20    6.10
   5  -7 -10   14.80    4.70
   5   7  10   25.30    5.00
   5  -7 -10   10.80    5.70
  -6   7  10  175.98   20.60
   6  -7  10  169.88   11.60
   6  -7 -10  158.98   12.70
   6  -7 -10  157.28   14.40
  -7   7  10   52.39   13.30
   7  -7  10   36.80    6.80
   7  -7 -10   66.19    9.90
   7  -7 -10   57.29    8.70
   0  -8 -10   14.90    4.50
   0  -8  10   10.20    3.70
   0   8  10   10.00    5.10
  -1   8  10  130.59   13.20
   1  -8  10  148.39   11.00
  -1  -8 -10  127.19    9.70
   1   8  10  109.79   11.50
  -1  -8  10  121.09   10.10
   1  -8 -10  108.09   10.40
  -2   8  10    5.40    5.70
   2  -8  10   11.10    4.70
  -2  -8 -10    6.30    3.50
   2  -8 -10   10.90    4.80
  -2  -8  10   12.30    4.40
   2   8  10   10.00    3.90
  -3   8  10  176.48   17.50
   3  -8  10  181.98   12.90
  -3  -8  10  158.18   12.00
   3  -8 -10  171.08   13.80
   4  -8  10   77.19    8.80
   4  -8  10   80.49    6.60
  -4   8  10   71.29   14.00
  -4  -8  10   62.09    8.20
   4  -8 -10   83.29   10.30
   5  -8  10   50.49    7.60
  -5   8  10   48.70   12.50
   5  -8  10   50.89    6.00
   5  -8 -10   65.39   10.70
   5  -8 -10   48.80    7.30
  -6   8  10   39.00   12.40
   6  -8  10   24.20    5.50
   6  -8 -10   35.00    7.50
   6  -8 -10   27.90    8.10
  -7   8  10   19.10   11.60
   7  -8  10   20.10    5.60
   7  -8 -10   10.00    6.40
   7  -8 -10   17.10    6.20
   0   9  10  232.58   18.00
   0  -9  10  230.48   15.30
   0  -9 -10  252.37   15.70
  -1   9  10  832.02   42.60
   1  -9  10  897.91   39.40
  -1  -9 -10  884.11   38.20
  -1  -9  10  839.02   38.50
   1  -9 -10  915.61   39.90
  -2  -9 -10   14.00    5.20
   2  -9  10   17.30    5.50
  -2   9  10   22.00    7.10
   2  -9 -10   19.30    6.20
  -2  -9  10   15.80    4.90
  -3   9  10  102.09   14.50
   3  -9  10  131.39   11.40
  -3  -9  10   92.59    9.70
   3  -9 -10  126.29   12.50
   4  -9  10   -1.50    3.60
  -4   9  10    6.80    7.60
   4  -9 -10    8.10    5.80
  -4  -9  10    0.00    4.00
   4  -9 -10    0.80    3.50
  -5   9  10  116.59   17.70
   5  -9 -10  133.99   13.70
   6  -9  10   24.60    5.20
  -6   9  10   40.20   13.00
   6  -9  10   22.00    9.20
   6  -9 -10   31.80    7.20
   6  -9 -10   23.40    8.20
   0 -10  10   64.09    8.70
   0 -10 -10   71.49    9.60
  -1 -10 -10   61.39    8.20
  -1 -10  10   79.29    9.00
   1 -10 -10   54.29    8.80
  -2  10  10  211.98   18.20
   2 -10  10  198.28   14.60
  -2 -10  10  189.68   14.10
   2 -10 -10  190.98   15.60
   3 -10  10   -5.80    3.60
  -3  10  10   -0.90    5.40
  -3 -10  10    1.80    3.90
   3 -10 -10    6.00    4.60
   4 -10  10   47.10    8.90
  -4  10  10   89.29   16.40
   4 -10 -10   49.80    7.20
   4 -10 -10   58.29   10.90
  -5  10  10  185.58   20.70
   5 -10  10  162.78   14.90
   5 -10 -10  196.48   17.30
   5 -10 -10  167.88   13.10
  -6  10  10   56.49   16.60
   6 -10 -10   68.79   12.60
   6 -10 -10   69.29    9.20
   0 -11  10   -2.60    3.70
   0 -11 -10    1.50    4.50
   1 -11  10  154.28   13.70
  -1 -11 -10  157.38   12.90
  -1 -11  10  164.98   13.50
   1 -11 -10  131.89   13.30
   2 -11  10   66.59    9.60
   2 -11 -10   74.49   10.70
  -2 -11  10   48.80    8.50
   3 -11  10   24.80    7.30
  -3 -11  10   42.40    8.20
   3 -11 -10   51.19   10.00
  -4  11  10    9.00    8.90
   4 -11  10    2.90    5.70
   4 -11 -10    2.50    6.40
   4 -11 -10    4.40    6.40
  -5  11  10   28.30   11.50
   5 -11  10   10.70    6.50
   5 -11 -10   19.80    7.70
   5 -11 -10   27.20    6.20
   0 -12  10  277.07   19.90
   0 -12 -10  362.06   21.70
   1 -12  10   53.09    9.70
  -1 -12 -10   37.40    8.30
  -1 -12  10   50.09    9.20
   1 -12 -10   52.19    9.90
   2 -12  10  168.48   15.20
   2 -12 -10  169.88   16.10
  -2 -12  10  149.29   13.60
   3 -12  10   42.90    9.50
   3 -12 -10   49.10   11.00
  -3 -12  10   40.90    8.00
   4 -12  10  160.78   15.60
   4 -12 -10  163.88   16.50
   0 -13 -10   -6.90    3.80
   0 -13  10    1.10    4.80
   1 -13  10  109.89   12.80
   1 -13 -10   78.89   11.50
  -1 -13  10   76.69   11.00
   2 -13  10   29.00    8.80
   2 -13 -10   55.99   11.50
  -2 -13  10   46.80    9.20
   3 -13  10   27.60    8.50
   3 -13 -10   36.00   10.10
  -3 -13  10   36.60    8.50
   0 -14  10   -1.10    6.10
   0 -14 -10   11.30    7.40
   1 -14  10   60.29   11.20
  -1 -14  10   80.69   11.60
   1 -14 -10   82.59   13.40
   0   0  11    0.70    1.10
   0   0  11   -2.10    2.00
  -1   0  11   47.60    5.70
   1   0  11   44.20    3.50
   1   0  11   35.90    4.30
  -1   0  11   41.60    6.30
  -2   0  11   17.00    5.10
  -2   0  11   15.20    4.20
   2   0  11   13.00    2.50
   2   0  11    8.70    2.30
  -3   0  11   65.09    9.10
   3   0  11   61.89    4.80
   3   0  11   65.59    4.90
   3   0 -11   74.09    6.70
  -3   0  11   63.09    7.70
  -4   0  11  137.59   13.00
   4   0 -11  146.29   10.50
  -4   0  11  162.18   12.60
   4   0  11  156.58    8.80
   5   0 -11   30.20    5.60
   5   0  11   33.60    4.20
  -5   0  11   57.89   12.70
  -5   0  11   51.29    8.90
   5   0 -11   25.00    4.80
   6   0 -11   -0.50    2.50
   6   0 -11   -1.90    2.90
  -6   0  11    0.90    4.60
   6   0  11   -0.60    2.40
   7   0 -11  204.38   13.80
  -7   0  11  246.08   21.40
   7   0  11  214.58   13.30
  -8   0  11   86.99   15.70
   8   0 -11   94.99    9.60
   8   0  11   80.09    8.70
   0  -1  11   21.50    3.90
   0  -1  11   19.60    2.20
   0   1  11   23.90    2.80
   0   1  11   13.40    3.70
  -1   1  11  395.56   19.70
   1  -1  11  408.06   16.70
   1  -1  11  413.06   17.90
   1   1  11  419.96   18.40
  -1  -1  11  432.96   19.50
  -1  -1  11  360.56   19.90
   1   1  11  398.86   16.60
   2  -1  11  181.38    9.30
  -2   1  11  159.38   13.50
  -2   1  11  172.58   11.90
   2  -1  11  159.68    8.40
   2   1  11  167.78    8.60
   2  -1 -11  163.58   10.10
   2   1  11  170.58    9.10
  -2  -1  11  148.69   10.60
  -2  -1  11  167.18   12.80
   3  -1  11   76.99    5.50
  -3   1  11  103.69   10.70
   3  -1  11   82.99    5.80
  -3   1  11   75.19    8.70
  -3  -1  11   77.89    9.40
   3  -1 -11  102.39    8.00
   3   1  11   96.79    6.20
   3   1  11   95.79    5.90
  -3  -1  11   88.99    8.50
  -4   1  11  106.79   10.70
   4  -1  11  113.89    7.40
  -4   1  11  102.89   11.60
   4   1 -11  113.69    8.90
   4   1  11  112.59    7.20
  -4  -1  11  105.59   10.30
   4  -1 -11  134.59    9.80
  -4  -1  11  134.59   12.50
   5   1 -11  195.88   13.10
  -5   1  11  249.18   19.40
   5  -1  11  216.98   11.80
  -5   1  11  222.88   16.30
  -5  -1  11  206.58   16.00
   5   1  11  220.08   11.70
   5  -1 -11  211.68   13.70
   6  -1  11   58.89    6.20
  -6   1  11   59.29   11.50
   6   1 -11   48.60    6.10
   6   1 -11   47.20    6.30
   6  -1 -11   53.39    6.40
  -6  -1  11   61.19   10.30
  -6  -1  11   41.10   10.20
   6   1  11   44.20    5.60
   6  -1 -11   52.19    7.60
   7  -1  11   95.19    8.50
   7   1 -11   93.59    8.80
  -7   1  11   95.39   13.80
   7  -1 -11   91.49    9.20
   7   1  11   91.59    8.30
  -7  -1  11   69.59   13.60
   8  -1  11    6.70    4.10
   8   1 -11   14.90    5.00
  -8   1  11   24.30    9.90
   8   1  11   10.20    4.60
   8  -1 -11   15.30    5.30
   0   2  11 2425.06   92.79
   0  -2  11 2449.95   88.99
   0  -2 -11 2446.16   91.19
   0  -2  11 2495.15   91.39
   0   2  11 2544.25   91.19
   1  -2  11    8.50    2.70
   1  -2  11    9.30    1.90
  -1   2  11   14.90    4.70
  -1   2  11   10.70    4.00
  -1  -2 -11   11.20    2.70
  -1  -2  11    5.50    2.40
   1  -2 -11   15.70    3.60
   1   2  11    8.90    1.80
  -1  -2  11    5.70    3.20
   1   2  11    9.80    3.30
  -2   2  11   26.10    5.40
  -2   2  11   18.40    6.20
   2  -2  11   14.80    2.50
  -2  -2 -11   14.90    2.60
   2  -2  11   14.20    3.00
   2   2  11   18.50    3.50
  -2  -2  11   15.70    4.00
   2   2  11   15.20    2.70
  -2  -2  11   25.80    5.60
   2  -2 -11   21.20    4.30
  -3   2  11   93.49   11.20
   3  -2  11   74.99    5.50
  -3  -2 -11   81.99    4.90
  -3   2  11   83.69    9.10
   3  -2  11   83.59    5.90
   3   2  11   73.49    5.60
  -3  -2  11   67.89    7.60
   3   2  11   76.69    5.30
  -3  -2  11   77.29    8.70
   3  -2 -11   82.59    7.50
  -4   2  11    3.00    5.10
   4  -2  11    2.30    1.80
   4  -2  11   -0.80    1.20
  -4   2  11    1.20    3.70
  -4  -2  11    0.00    3.30
  -4  -2  11    0.90    3.80
   4   2  11   -0.80    1.70
   4  -2 -11    0.10    2.90
   5  -2  11   29.10    4.30
   5   2 -11   27.30    5.60
  -5   2  11   29.80    9.10
   5   2 -11   28.50    4.60
  -5  -2  11   26.40    7.60
   5   2  11   27.30    4.40
  -5  -2  11   31.90    7.30
   5  -2 -11   28.60    6.20
  -6   2  11  131.59   16.50
   6   2 -11  146.99   11.10
   6  -2  11  160.98   10.10
   6   2 -11  148.39   10.30
  -6  -2  11  123.49   14.80
   6   2  11  152.18   10.00
   6  -2 -11  137.49   11.50
   6  -2 -11  158.78   11.20
  -7   2  11   39.60   10.60
   7   2 -11   16.10    4.60
   7  -2 -11   10.50    4.70
  -7  -2  11   27.30    9.20
   7   2  11   14.80    4.20
   8   2 -11   81.99    8.80
  -8   2  11   82.09   15.70
   8  -2  11   89.39    9.20
   8  -2 -11   94.29   10.20
   8   2  11   77.69    8.30
   0  -3  11   63.29    5.80
   0  -3 -11   58.59    5.60
   0   3  11   74.69    7.10
   0  -3  11   68.09    4.10
   1  -3  11  614.74   23.90
  -1  -3 -11  623.24   25.30
   1  -3  11  633.04   25.90
  -1   3  11  605.34   28.20
   1   3  11  650.83   26.80
  -1  -3  11  586.34   26.30
   1  -3 -11  560.14   26.10
   1   3  11  611.84   24.00
  -1  -3  11  615.44   27.00
  -2  -3 -11   32.20    3.70
  -2   3  11   28.40    6.00
   2  -3  11   43.00    4.50
  -2   3  11   29.50    7.50
   2  -3  11   39.50    3.40
  -2  -3  11   29.00    5.60
   2   3  11   38.70    3.60
  -2  -3  11   43.30    5.50
   2  -3 -11   44.10    5.40
  -3   3  11  786.72   38.80
   3  -3  11  784.12   31.10
   3  -3  11  742.83   30.00
  -3  -3  11  729.13   33.20
  -3  -3  11  739.53   34.10
   3   3  11  790.62   30.50
   3  -3 -11  745.03   33.10
   4  -3  11  580.84   25.50
   4  -3  11  595.64   25.30
  -4   3  11  658.03   35.20
  -4  -3  11  588.54   29.60
   4   3  11  617.94   25.50
   4  -3 -11  644.84   28.70
  -4  -3  11  592.14   28.80
  -5   3  11  193.28   18.50
   5   3 -11  185.38   10.10
   5  -3  11  171.48   10.40
  -5  -3  11  163.68   14.10
  -5  -3  11  153.28   13.30
   5  -3 -11  179.48   13.30
   5   3  11  154.88    9.70
   6   3 -11   33.10    4.70
  -6   3  11   31.40   10.20
   6  -3  11   40.90    5.50
  -6  -3  11   30.90    8.40
   6   3  11   41.20    5.30
   6  -3 -11   25.00    5.30
   7  -3  11   84.19    8.30
  -7   3  11   97.89   17.20
   7  -3 -11   85.99    9.30
   7  -3 -11   84.99    9.60
   7   3  11   86.39    7.90
   8  -3  11   49.50    7.40
  -8   3  11   37.80   12.00
   8  -3 -11   54.29    8.30
   8   3  11   47.00    6.60
   0  -4  11  474.95   17.70
   0   4  11  416.36   22.40
   0  -4 -11  434.16   20.30
   0  -4  11  449.36   20.50
  -1   4  11   78.19    9.50
   1  -4  11  100.29    7.30
   1  -4  11   97.09    5.60
  -1  -4 -11   92.49    6.80
  -1  -4  11  117.69    8.20
   1  -4 -11   88.79    7.60
   1   4  11  105.59    6.00
  -1  -4  11  109.59    7.90
   2  -4  11  210.68   11.70
  -2   4  11  202.08   16.60
   2  -4  11  209.98   10.10
  -2  -4 -11  214.18   10.60
   2  -4 -11  222.08   12.90
  -2  -4  11  200.58   12.50
   2   4  11  221.38   10.30
  -2  -4  11  205.48   12.20
  -3   4  11  154.08   15.20
   3  -4  11  147.69    8.40
   3  -4  11  160.68    9.60
  -3  -4  11  148.69   10.90
   3   4  11  164.68    8.70
   3  -4 -11  147.09   11.00
  -3  -4  11  131.89   10.50
  -4   4  11  108.79   13.80
   4  -4  11   98.59    6.90
   4  -4  11   89.29    7.50
   4  -4 -11  108.09    9.80
   4   4  11  100.39    7.00
  -4  -4  11   92.99   10.40
  -4  -4  11   77.99    8.60
   5   4 -11   30.80    4.50
   5  -4  11   18.60    4.00
  -5   4  11    9.90    7.40
   5  -4 -11   24.70    6.00
  -5  -4  11   23.50    5.80
   5   4  11   28.30    4.30
  -6   4  11   58.19   13.40
   6  -4  11   29.60    5.50
   6  -4 -11   33.40    6.00
   6  -4 -11   30.60    6.70
   6   4  11   23.80    4.50
  -7   4  11   26.80   11.10
   7  -4  11   32.00    6.00
   7  -4 -11   23.50    6.50
   7  -4 -11   37.90    7.20
   7   4  11   28.70    5.40
   8  -4  11  225.48   14.60
  -8   4  11  161.08   21.90
   8  -4 -11  194.58   15.10
   8   4  11  178.38   12.70
   0  -5  11   17.70    4.00
   0  -5 -11   12.10    3.50
   0  -5  11   10.50    1.60
   0   5  11    3.20    4.00
  -1  -5 -11   49.50    5.20
   1  -5  11   44.20    5.00
   1  -5  11   50.59    3.80
  -1   5  11   52.69    9.30
   1   5  11   59.89    5.30
  -1  -5  11   44.80    5.50
   1  -5 -11   46.20    5.40
  -1  -5  11   43.00    5.20
  -2  -5 -11  417.46   19.10
   2  -5  11  453.85   20.80
   2  -5  11  425.46   18.20
  -2   5  11  421.56   26.20
  -2  -5  11  434.96   21.00
   2   5  11  454.85   18.40
   2  -5 -11  469.35   22.20
   3  -5  11  632.74   25.20
  -3   5  11  654.13   35.20
   3  -5  11  615.64   27.30
   3  -5 -11  626.34   29.00
   3   5  11  608.14   25.00
  -3  -5  11  563.04   27.60
  -4   5  11  142.29   16.30
   4  -5  11  134.29    9.80
   4  -5  11  150.48    8.90
  -4  -5  11  135.99   10.80
   4  -5 -11  120.59   11.10
   4   5  11  145.39    8.70
  -5   5  11   64.69   13.10
   5  -5  11   74.59    6.80
   5  -5  11   87.79    7.90
   5  -5 -11   68.39    8.80
   5   5  11   76.39    6.40
  -5  -5  11   57.59    9.30
   6  -5  11  188.08   12.20
   6  -5 -11  210.78   14.00
   6   5  11  186.58   11.70
  -7   5  11   38.80   12.40
   7  -5  11   29.40    6.00
   7  -5 -11   44.70    8.80
   7  -5 -11   37.80    7.70
   7   5  11   23.80    5.20
  -8   5  11   37.90   14.80
   8   5  11   35.80    6.60
   8  -5 -11   35.30    7.70
   0  -6 -11   23.30    4.70
   0   6  11   18.00    5.90
   0  -6  11   21.80    4.30
   1  -6  11   51.99    6.00
  -1   6  11   65.79   10.70
   1  -6  11   50.29    3.80
  -1  -6 -11   56.29    5.90
   1  -6 -11   60.09    6.80
   1   6  11   39.60    6.00
  -1  -6  11   50.99    5.60
  -2  -6 -11  146.69    9.30
   2  -6  11  146.79   10.50
  -2   6  11  172.48   15.70
   2   6  11  158.28    8.30
   2  -6 -11  146.09   11.20
   3  -6  11   87.19    6.20
   3  -6  11   97.39    8.40
  -3   6  11   94.29   13.30
   3   6  11   91.19    6.00
   3  -6 -11   88.79    9.20
  -3  -6  11   89.49    8.30
   4  -6  11   59.49    6.90
   4  -6  11   60.59    5.70
  -4   6  11   55.89   12.30
  -4  -6  11   79.59    8.90
   4  -6 -11   51.09    8.60
   4   6  11   60.89    5.30
  -5   6  11  126.29   16.90
   5  -6  11  115.99    8.40
   5  -6  11  106.99    9.50
  -5  -6  11   92.99   10.00
   5   6  11   89.19    7.20
   5  -6 -11  123.39   11.60
  -6   6  11  107.79   18.60
   6  -6  11  126.29    9.50
   6  -6 -11  120.99   10.80
   6   6  11  115.49    8.50
   6  -6 -11  107.39   11.60
   7  -6  11   36.30    6.50
  -7   6  11   65.39   16.10
   7  -6 -11   48.50    8.50
   7  -6 -11   44.50    9.00
   8  -6  11   35.90    6.30
   8  -6 -11   19.20    6.90
   0   7  11   27.00    7.30
   0  -7 -11   24.90    5.30
   0  -7  11   20.40    4.50
  -1  -7 -11  115.99    9.10
   1  -7  11  119.69    9.80
  -1   7  11  118.59   12.90
   1  -7 -11  134.59   10.60
   1   7  11  128.69   11.50
  -1  -7  11  127.19    9.90
   2  -7  11   29.20    3.50
  -2  -7 -11   25.40    4.80
  -2   7  11   27.30    8.20
   2  -7  11   31.30    5.90
   2   7  11   29.40    4.40
  -2  -7  11   35.70    6.20
   2  -7 -11   41.20    7.10
  -3   7  11   54.49   11.70
   3  -7  11   88.69    8.50
   3  -7  11   87.69    6.00
  -3  -7  11   73.19    8.00
   3  -7 -11   68.89    8.90
   3   7  11   71.99    5.30
  -4   7  11  323.07   24.60
   4  -7  11  291.77   16.90
   4  -7  11  294.07   14.30
  -4  -7  11  270.17   16.90
   4  -7 -11  274.37   18.10
   4   7  11  273.27   13.50
  -5   7  11   53.29   13.30
   5  -7  11   43.00    7.20
   5  -7  11   42.50    5.90
   5   7  11   33.20    4.70
   5  -7 -11   30.30    7.70
   5  -7 -11   49.30    7.30
  -6   7  11  100.49   18.10
   6  -7  11   97.59    8.60
   6  -7 -11   95.19   10.00
   6  -7 -11   77.19   10.60
  -7   7  11  114.19   21.00
   7  -7  11   92.59    9.10
   7  -7 -11   83.49   11.30
   7  -7 -11   88.49   10.70
   0   8  11  193.48   16.10
   0  -8  11  190.78   12.90
   0  -8 -11  190.58   13.10
  -1  -8 -11  294.17   16.60
  -1   8  11  325.37   21.90
   1  -8  11  303.77   17.70
   1   8  11  280.87   19.40
   1  -8 -11  313.27   18.20
  -1  -8  11  308.67   17.30
  -2  -8 -11   31.70    5.40
   2  -8  11   32.20    6.40
  -2   8  11   25.60    8.10
   2   8  11   19.80    5.50
   2  -8 -11   40.30    7.50
  -2  -8  11   32.60    5.90
   3  -8  11  193.98   13.60
  -3   8  11  207.68   19.30
  -3  -8  11  167.08   12.70
   3  -8 -11  213.88   15.30
   3   8  11  187.18   10.70
  -4   8  11  168.28   18.90
   4  -8  11  166.08   12.70
   4  -8  11  154.08    9.50
   4  -8 -11  141.39   13.20
   5  -8  11   13.00    3.90
   5  -8  11   13.10    5.40
  -5   8  11   28.30   11.30
   5  -8 -11   20.40    7.00
   5  -8 -11   28.50    6.00
   6  -8  11   14.00    4.20
  -6   8  11   12.30    9.60
   6  -8 -11    9.30    4.80
   6  -8 -11   11.10    6.80
   7  -8  11   96.59    9.40
  -7   8  11   75.79   18.50
   7  -8 -11   89.49   12.40
   7  -8 -11  117.29   11.80
   0  -9  11   31.80    6.70
   0   9  11   36.50    8.90
   0  -9 -11   41.90    7.20
  -1   9  11    9.10    6.70
  -1  -9 -11    4.30    4.00
   1  -9  11    9.90    4.10
   1   9  11    3.80    6.10
   1  -9 -11    6.30    4.90
  -1  -9  11    1.90    3.70
  -2   9  11   36.20    9.70
   2  -9  11   33.00    6.80
  -2  -9  11   32.50    6.60
   2  -9 -11   32.10    7.20
   3  -9  11  183.68   14.20
  -3   9  11  202.78   19.30
   3  -9 -11  193.98   15.40
  -3  -9  11  203.48   14.20
   4  -9  11    3.30    4.40
  -4   9  11   12.10    8.20
   4  -9 -11    2.60    5.00
  -4  -9  11   -1.50    3.10
  -5   9  11   71.79   16.10
   5  -9  11   57.09    9.60
   5  -9 -11   70.39    8.60
   5  -9 -11   69.19   11.50
  -6   9  11   27.00   12.70
   6  -9 -11   18.30    7.80
   6  -9 -11   17.80    6.10
   0 -10 -11   80.49    9.80
   0 -10  11   92.99    9.90
  -1  10  11   89.99   12.00
  -1 -10 -11   99.19    9.70
   1 -10  11   88.39    9.60
  -1 -10  11   98.49   10.20
  -2  10  11  303.37   22.60
   2 -10  11  257.27   18.00
   2 -10 -11  262.67   18.40
  -2 -10  11  306.97   18.10
   3 -10  11   74.79    9.90
  -3  10  11  110.09   14.90
  -3 -10  11   81.29    9.60
   3 -10 -11  101.69   11.90
  -4  10  11   18.00    9.20
   4 -10  11   -0.60    4.30
   4 -10 -11    6.30    5.50
   4 -10 -11    5.60    4.30
  -4 -10  11    0.20    4.10
   5 -10  11  143.69   13.30
  -5  10  11  110.59   19.20
   5 -10 -11  126.89   11.40
   5 -10 -11  148.99   15.20
  -6  10  11   22.90   11.60
   6 -10 -11   12.40    5.90
   6 -10 -11   37.80   10.20
   0 -11 -11  296.17   18.80
   0 -11  11  274.27   18.30
  -1 -11 -11   73.79    9.70
   1 -11  11   54.79    9.50
   1 -11 -11   56.09    9.90
  -1 -11  11   60.99    8.90
   2 -11  11   56.79   10.00
  -2 -11  11   51.59    8.60
   3 -11  11  147.09   13.80
  -3 -11  11  146.79   13.20
   3 -11 -11  133.89   14.50
   4 -11  11   73.09   10.70
  -4  11  11   95.49   16.70
   4 -11 -11  114.69   13.70
   5 -11  11   24.00    8.00
  -5  11  11   13.40    8.90
   5 -11 -11    7.80    4.70
   5 -11 -11    0.50    5.90
   0 -12  11   30.90    7.50
   0 -12 -11   26.50    7.70
  -1 -12 -11   10.50    5.80
   1 -12  11   10.00    6.00
  -1 -12  11   15.50    5.80
   1 -12 -11   19.60    7.90
   2 -12  11    8.40    5.70
  -2 -12  11    4.00    4.40
   2 -12 -11    6.90    6.90
   3 -12  11   -4.50    4.80
   3 -12 -11    2.80    6.60
  -3 -12  11   -5.20    4.50
   4 -12  11   70.29   11.70
   4 -12 -11   44.90   10.70
   0 -13  11   14.10    6.50
   0 -13 -11    4.50    5.40
   1 -13  11   73.59   11.10
  -1 -13  11   54.59   10.40
   1 -13 -11   59.69   11.50
   2 -13  11   26.80    8.50
   2 -13 -11   29.50    9.20
  -2 -13  11   37.20    8.30
   3 -13  11   74.79   12.90
   3 -13 -11   97.09   14.00
  -3 -13  11   60.69   10.50
   0   0  12    2.40    2.60
   0   0  12    2.90    1.50
   1   0  12  156.88    7.90
  -1   0  12  183.08   11.10
  -1   0  12  141.69   11.40
   1   0  12  157.88    9.50
   2   0  12    1.60    1.60
   2   0  12    1.00    1.40
  -2   0  12    0.40    2.50
  -2   0  12    0.40    3.70
  -3   0  12    3.50    4.60
   3   0  12    8.30    2.20
   3   0  12   12.30    2.50
  -3   0  12    6.30    3.90
  -4   0  12   18.80    5.90
  -4   0  12    8.00    5.00
   4   0 -12   13.30    4.00
   4   0  12   16.60    3.30
  -5   0  12 1250.17   54.39
   5   0 -12 1230.78   51.29
   5   0  12 1201.68   48.50
  -5   0  12 1310.87   57.89
   6   0  12    3.30    2.60
  -6   0  12    1.30    6.00
   6   0 -12    8.90    3.40
   6   0 -12    6.40    3.70
  -6   0  12   -2.70    4.30
   7   0  12   35.60    5.80
   7   0 -12   33.50    6.30
  -7   0  12   22.90    8.80
  -8   0  12   16.80    9.10
   0  -1  12 2181.38   80.19
   0   1  12 2109.09   80.69
   0  -1  12 2107.69   77.29
   0   1  12 2129.19   78.19
   1  -1  12   42.00    4.50
   1  -1  12   38.60    3.20
  -1   1  12   33.40    4.90
  -1   1  12   34.40    6.50
  -1  -1  12   33.70    6.10
  -1  -1  12   32.90    4.60
   1   1  12   37.90    4.50
   1   1  12   29.40    3.10
  -2   1  12   44.20    6.60
   2  -1  12   43.60    3.80
  -2   1  12   45.80    8.20
   2  -1  12   49.00    4.50
  -2  -1  12   43.90    7.70
   2   1  12   40.90    4.40
   2   1  12   40.90    3.70
   2  -1 -12   46.80    5.40
  -2  -1  12   48.10    6.20
   3  -1  12   82.09    5.90
   3  -1  12   96.19    6.20
  -3   1  12  110.79   12.00
  -3   1  12  101.89   10.00
   3   1  12  101.69    6.30
   3  -1 -12   87.99    8.00
   3   1  12   88.29    6.30
  -3  -1  12   76.79    9.80
  -4   1  12   38.60    9.50
   4  -1  12   42.50    4.60
   4   1 -12   39.50    5.80
  -4   1  12   48.00    8.20
   4  -1 -12   42.40    6.20
  -4  -1  12   35.90    7.40
  -4  -1  12   32.70    7.80
   4   1  12   51.19    4.90
  -5   1  12  121.49   12.60
   5  -1  12  149.39    9.40
  -5   1  12  144.39   15.70
   5   1 -12  130.99   10.50
  -5  -1  12  157.48   14.90
   5   1  12  149.88    9.40
   5  -1 -12  156.48   11.50
  -6   1  12   28.80    9.40
   6   1 -12   18.30    4.50
   6  -1  12   17.80    4.20
   6   1 -12   19.10    5.00
   6   1  12   15.50    4.00
   6  -1 -12   25.00    5.10
   6  -1 -12   16.70    5.10
  -6  -1  12    7.50    6.00
  -7   1  12  133.99   17.30
   7  -1  12  124.39    9.40
   7   1 -12  114.69    9.80
  -7  -1  12   97.29   14.60
   7   1  12  110.49    9.30
   7  -1 -12  109.99   10.20
  -8   1  12   24.00    9.60
   8  -1  12    9.40    4.50
   8   1 -12    4.10    3.90
   8   1  12    5.40    4.00
   8  -1 -12    6.70    4.40
  -8  -1  12   13.10    7.50
   0   2  12    6.20    2.50
   0  -2  12    3.80    2.60
   0  -2 -12    5.60    2.50
   0  -2  12    6.30    1.50
   0   2  12   10.80    3.60
  -1  -2 -12  213.88   10.80
   1  -2  12  206.58   11.10
  -1   2  12  181.48   14.40
   1  -2  12  210.28    9.70
  -1   2  12  216.48   13.60
  -1  -2  12  190.48   12.50
   1  -2 -12  192.18   11.50
   1   2  12  192.48   11.60
   1   2  12  206.78    9.70
  -1  -2  12  216.08   12.30
   2  -2  12   22.70    3.10
   2  -2  12   25.30    3.60
  -2  -2 -12   21.30    3.20
  -2   2  12   19.30    6.60
  -2   2  12   33.40    6.10
   2  -2 -12   23.30    4.50
  -2  -2  12   14.70    5.10
   2   2  12   16.40    3.40
   2   2  12   19.80    2.70
  -2  -2  12   28.70    5.20
  -3   2  12  351.46   22.90
   3  -2  12  347.57   15.60
  -3  -2 -12  368.16   15.00
   3  -2  12  326.47   15.80
  -3   2  12  340.27   20.30
   3   2  12  347.07   15.70
   3   2  12  340.27   15.70
   3  -2 -12  342.07   18.10
  -3  -2  12  347.47   20.20
  -3  -2  12  341.07   19.00
  -4   2  12   28.00    8.10
   4  -2  12   40.70    4.20
  -4   2  12   40.70    7.90
   4  -2  12   32.90    4.10
   4  -2 -12   32.10    6.00
  -4  -2  12   24.40    6.10
  -4  -2  12   34.70    7.50
   5  -2  12    8.30    3.20
  -5   2  12    2.60    5.60
   5   2 -12    7.00    2.80
   5   2  12   12.40    3.40
   5  -2 -12    8.10    3.90
  -5  -2  12    4.60    4.90
   6   2 -12   49.00    7.50
   6  -2  12   58.89    6.40
   6   2 -12   48.20    5.70
  -6   2  12   49.90   11.60
   6  -2 -12   38.80    7.20
   6  -2 -12   55.79    7.00
   6   2  12   39.40    5.50
  -6  -2  12   64.89   11.50
   7   2 -12  129.99   10.40
  -7   2  12  151.58   18.90
   7  -2  12  147.29   10.80
   7   2  12  145.69   10.50
  -7  -2  12  160.48   16.90
   7  -2 -12  146.19   11.90
   8   2 -12  131.79   13.50
  -8   2  12  177.38   20.00
   8  -2  12  149.79   11.80
   8   2  12  144.89   11.30
   8  -2 -12  149.69   12.90
   0   3  12  105.99    8.80
   0  -3  12  100.69    5.30
   0   3  12  104.59    8.30
   0  -3 -12   89.59    7.00
   0  -3  12   86.59    6.80
  -1   3  12  729.23   36.40
   1  -3  12  766.32   29.70
   1  -3  12  785.22   31.90
  -1  -3 -12  747.83   31.00
  -1   3  12  810.32   34.50
   1   3  12  767.42   29.80
  -1  -3  12  778.02   32.60
   1   3  12  811.22   32.80
   1  -3 -12  724.63   32.00
  -1  -3  12  787.52   33.30
  -2   3  12  954.90   41.10
  -2  -3 -12  943.61   36.10
   2  -3  12  918.31   35.70
  -2   3  12  979.60   44.60
   2  -3  12  916.01   37.00
   2   3  12  946.31   37.30
  -2  -3  12  890.01   38.70
  -2  -3  12  960.50   40.40
   2   3  12  927.51   35.80
   2  -3 -12  863.51   38.30
   3  -3  12  478.15   20.80
   3  -3  12  503.35   21.80
   3  -3 -12  492.55   23.90
  -3  -3  12  488.75   24.40
  -3  -3  12  477.35   24.90
   3   3  12  518.05   21.20
  -4   3  12  536.05   31.70
   4  -3  12  509.35   22.50
   4  -3  12  496.85   22.10
  -4  -3  12  478.65   25.60
   4   3  12  552.84   22.70
  -4  -3  12  517.65   27.10
   4  -3 -12  523.65   25.50
  -5   3  12   33.50   10.30
   5  -3  12   46.80    5.30
  -5  -3  12   45.20    8.70
  -5  -3  12   42.90    8.20
   5  -3 -12   53.19    7.50
   5   3  12   49.50    5.50
   6   3 -12   65.69    6.40
   6  -3  12   73.69    7.10
  -6   3  12   84.09   15.50
  -6  -3  12   55.09   10.50
   6   3  12   64.09    6.60
   6  -3 -12   50.79    7.10
   6  -3 -12   58.39    8.20
  -7   3  12    5.90    6.80
   7  -3  12   25.80    5.60
   7  -3 -12   20.80    5.80
   7  -3 -12   11.80    5.40
   7   3  12   21.70    4.90
   8  -3  12   57.99    8.00
   8  -3 -12   80.09    9.80
   8   3  12   67.39    7.80
   0  -4  12    5.20    2.80
   0  -4  12    3.80    1.20
   0   4  12   -0.50    2.60
   0  -4 -12    0.90    2.30
   1  -4  12  472.85   21.10
  -1   4  12  431.16   25.50
  -1  -4 -12  441.46   20.40
   1  -4  12  484.75   19.00
  -1  -4  12  435.16   21.40
   1   4  12  486.25   19.60
  -1  -4  12  484.65   22.10
  -2  -4 -12  317.27   14.70
   2  -4  12  306.77   15.60
   2  -4  12  304.77   14.00
  -2   4  12  319.37   21.40
   2   4  12  330.07   14.20
   2  -4 -12  328.87   17.30
  -2  -4  12  304.37   16.50
  -2  -4  12  316.67   17.20
   3  -4  12   15.40    3.60
   3  -4  12   14.70    3.10
  -3   4  12   23.30    8.00
   3  -4 -12   22.00    4.90
  -3  -4  12   15.90    4.70
   3   4  12   17.70    3.20
  -3  -4  12   13.10    4.40
   4  -4  12  253.77   13.80
  -4   4  12  263.47   21.60
   4  -4  12  268.17   13.20
  -4  -4  12  225.98   15.90
   4   4  12  273.27   13.30
   4  -4 -12  230.28   15.40
  -4  -4  12  276.67   16.60
   5  -4  12   90.09    7.30
  -5   4  12   85.09   14.60
   5   4  12   76.59    6.80
  -5  -4  12   80.49    9.40
   5  -4 -12   88.99    9.50
  -6   4  12  172.08   20.00
   6  -4  12  175.88   11.50
   6  -4 -12  184.28   14.30
   6   4  12  167.98   11.10
   6  -4 -12  193.38   13.40
  -7   4  12   23.70   10.10
   7  -4  12   16.30    5.00
   7   4  12   17.20    4.50
   7  -4 -12   17.00    5.30
   7  -4 -12   20.10    6.90
   8  -4  12   24.60    6.10
  -8   4  12   31.10   12.40
   8  -4 -12   39.70    8.00
   0   5  12   57.69    8.00
   0  -5 -12   54.19    6.10
   0  -5  12   58.69    5.90
   0  -5  12   69.49    3.90
   1  -5  12  411.86   17.30
   1  -5  12  452.45   20.50
  -1   5  12  415.76   25.20
  -1  -5 -12  427.46   19.60
  -1  -5  12  388.36   20.10
   1  -5 -12  425.76   21.00
  -1  -5  12  419.66   20.00
   1   5  12  440.26   19.60
  -2   5  12  404.36   25.60
   2  -5  12  402.56   17.10
  -2  -5 -12  403.36   18.10
   2  -5  12  399.86   19.40
   2  -5 -12  402.96   20.80
   2   5  12  412.76   17.20
  -2  -5  12  378.26   19.90
   3  -5  12   21.30    4.50
  -3   5  12   26.10    8.50
   3  -5  12   24.30    3.90
   3   5  12   24.20    3.40
  -3  -5  12   25.10    5.30
   3  -5 -12   28.10    5.90
   4  -5  12   98.89    8.10
   4  -5  12  104.19    7.20
  -4   5  12   77.69   12.10
  -4  -5  12  100.09    9.60
   4  -5 -12   91.59    9.60
   4   5  12   85.09    6.70
   5  -5  12  104.89    8.90
   5  -5  12  128.29    8.70
  -5   5  12  132.09   16.90
   5   5  12  109.49    8.10
   5  -5 -12  117.99   11.40
  -5  -5  12  120.19   11.40
  -6   5  12   59.09   15.10
   6  -5  12   67.59    7.10
   6  -5 -12   68.29    9.30
   6  -5 -12   63.49    8.30
   6   5  12   77.99    6.90
  -7   5  12   33.40   12.10
   7  -5  12   19.20    5.10
   7  -5 -12   20.40    5.90
   7   5  12   23.40    5.00
   7  -5 -12    9.10    5.70
  -8   5  12   74.49   17.50
   8  -5 -12   45.40    8.70
   8   5  12   31.40    6.20
   0  -6  12  637.04   27.60
   0  -6 -12  596.44   27.20
   0   6  12  574.64   30.90
  -1  -6 -12  222.48   12.80
   1  -6  12  222.48   13.50
  -1   6  12  226.58   17.80
   1  -6  12  217.28   10.30
   1  -6 -12  242.48   14.40
  -1  -6  12  250.37   14.00
  -2  -6 -12   39.30    5.00
   2  -6  12   45.10    5.40
   2  -6  12   44.40    4.00
  -2   6  12   51.19   10.50
  -2  -6  12   31.30    5.80
   2  -6 -12   47.10    6.30
   2   6  12   39.50    4.00
  -3   6  12  364.26   24.80
   3  -6  12  334.37   17.90
   3  -6  12  358.96   15.60
   3  -6 -12  333.57   19.40
  -3  -6  12  323.77   18.40
   3   6  12  311.57   15.00
   4  -6  12   99.79    9.20
  -4   6  12  108.89   15.30
   4  -6  12   96.89    7.10
  -4  -6  12   81.69    9.30
   4   6  12   86.69    6.70
   5  -6  12  141.89    9.60
  -5   6  12  164.98   19.10
   5  -6  12  146.69   10.90
   5  -6 -12  135.19   12.40
   5   6  12  118.99    8.70
   6  -6  12   88.79    8.10
  -6   6  12  104.39   18.60
   6   6  12   87.19    7.50
   6  -6 -12   88.29    9.60
  -7   6  12   77.59   17.20
   7  -6  12   64.79    7.90
   7  -6 -12   69.19    9.90
   7  -6 -12   80.49    9.90
   0   7  12   46.70    9.20
   0  -7  12   50.59    6.80
   0  -7 -12   62.49    7.10
  -1  -7 -12   75.19    7.30
  -1   7  12   63.59   11.20
   1  -7  12   76.29    7.80
   1   7  12   67.79    8.60
   1  -7 -12   90.79    8.80
  -1  -7  12   74.49    7.40
   2  -7  12   63.59    7.50
  -2  -7 -12   59.09    6.50
  -2   7  12   52.29   11.00
   2  -7  12   71.59    5.20
   2  -7 -12   74.79    8.60
  -2  -7  12   86.49    8.30
   2   7  12   67.49    6.60
   3  -7  12  113.99    7.40
   3  -7  12  134.09   10.50
  -3  -7  12  117.09   10.30
   3   7  12  108.09    7.10
   3  -7 -12  114.29   11.00
   4  -7  12    7.50    4.00
   4  -7  12   10.70    3.30
  -4   7  12    4.40    6.10
  -4  -7  12    1.60    3.60
   4  -7 -12    2.70    4.50
   4   7  12    6.30    2.30
  -5   7  12  101.49   17.10
   5  -7  12   82.29    7.20
   5   7  12   64.79    5.90
   5  -7 -12   61.19    9.40
   6  -7  12    7.80    3.50
  -6   7  12   12.50   10.30
   6  -7 -12    0.70    4.50
   6  -7 -12    1.20    3.90
  -7   7  12  104.79   19.50
   7  -7  12   64.99    8.00
   7  -7 -12   69.39   11.40
   7  -7 -12   78.49   10.20
   0   8  12   14.20    6.40
   0  -8  12   11.30    4.50
   0  -8 -12   12.50    4.70
  -1  -8 -12  139.69   10.30
  -1   8  12  120.89   13.70
   1  -8  12  109.69    9.90
  -1  -8  12  141.49   10.70
   1  -8 -12  122.19   10.50
   1   8  12   97.49   11.30
   2  -8  12   61.19    8.00
  -2  -8 -12   40.60    9.60
  -2   8  12   52.49   11.40
   2  -8 -12   59.49    7.80
  -2  -8  12   66.19    7.90
   3  -8  12   88.39    9.30
  -3   8  12   93.39   15.30
   3  -8 -12   84.89   10.30
  -3  -8  12   91.69    9.20
   3   8  12   78.49    6.70
  -4   8  12    7.70    5.60
   4  -8  12    2.90    3.90
   4  -8  12    7.40    3.10
  -4  -8  12   10.40    5.00
   4  -8 -12   14.70    6.10
   5  -8  12  201.48   14.60
   5  -8  12  164.78   11.00
  -5   8  12  175.28   21.00
   5  -8 -12  185.18   15.70
   6  -8  12  152.28   10.80
   6  -8 -12  136.69   12.50
   6  -8 -12  153.38   14.60
   7  -8  12  132.29   10.90
  -7   8  12  156.58   25.20
   7  -8 -12  131.19   13.00
   7  -8 -12  130.49   15.00
   0  -9  12  221.58   15.00
   0   9  12  195.08   17.30
   0  -9 -12  211.98   14.60
   1  -9  12   40.20    7.30
  -1   9  12   41.30    9.70
  -1  -9 -12   51.89    7.80
  -1  -9  12   40.80    7.30
   1   9  12   30.10    8.20
   2  -9  12  180.38   13.90
  -2   9  12  181.78   17.80
   2  -9 -12  217.68   15.30
  -2  -9  12  181.78   13.50
   3  -9  12   15.60    5.80
  -3   9  12    7.50    7.10
  -3  -9  12   13.40    5.10
   3  -9 -12    2.20    4.60
  -4   9  12   33.80   10.60
   4  -9  12   45.10    8.10
  -4  -9  12   29.30    6.50
   4  -9 -12   35.00    8.50
  -5   9  12   23.70   10.70
   5  -9 -12   39.00    9.00
   5  -9 -12   29.00    6.50
  -6   9  12   48.70   14.60
   6  -9 -12   43.00    8.10
   6  -9 -12   43.40    9.90
   0 -10  12  175.48   14.00
   0 -10 -12  189.78   14.40
  -1 -10 -12   93.69    9.50
   1 -10  12   71.69    9.20
  -1  10  12   72.19   12.70
  -1 -10  12   72.99    8.90
   1 -10 -12   67.29    9.50
  -2  10  12   96.29   14.70
   2 -10  12  140.79   12.60
  -2 -10  12  123.89   11.60
   2 -10 -12  137.69   13.00
  -3  10  12   71.69   13.10
  -3 -10  12   78.19    9.90
   3 -10 -12   61.89   10.70
   4 -10  12   73.99   10.10
  -4  10  12   95.49   16.80
  -4 -10  12   80.29    9.50
   4 -10 -12   90.59   12.00
  -5  10  12   23.40   11.40
   5 -10  12   20.60    7.00
   5 -10 -12   30.00    6.60
   5 -10 -12   24.30    8.50
  -6  10  12   12.90   10.60
   6 -10 -12   22.30    6.40
   6 -10 -12   29.60    9.30
   0 -11  12   92.69   10.50
   0 -11 -12   93.89   10.90
   1 -11  12   84.39   10.50
  -1 -11 -12  104.29   10.70
  -1 -11  12   97.49   10.70
   1 -11 -12   75.09   10.60
   2 -11  12   68.39   10.00
   2 -11 -12   43.60    9.70
  -2 -11  12   70.89    9.20
  -3  11  12   52.09   13.80
   3 -11  12   55.59    9.90
  -3 -11  12   49.70    9.00
   3 -11 -12   60.99   11.30
  -4  11  12  113.69   17.50
   4 -11  12  146.79   14.50
   4 -11 -12  140.99   15.40
   5 -11  12    1.90    4.90
  -5  11  12   17.80    9.90
   5 -11 -12    2.20    7.00
   5 -11 -12   11.30    5.00
   0 -12 -12   21.00    7.30
   0 -12  12    9.40    6.40
  -1 -12 -12  112.29   16.40
   1 -12  12  107.59   11.50
  -1 -12  12  111.19   12.10
   1 -12 -12  134.19   13.40
   2 -12  12  108.99   13.00
  -2 -12  12  148.99   13.80
   2 -12 -12  126.69   14.20
   3 -12  12   14.70    6.30
   3 -12 -12   12.00    7.60
  -3 -12  12   28.90    7.60
   4 -12  12   71.29   12.00
   4 -12 -12   77.89   13.60
   0 -13  12    3.50    5.70
   0 -13 -12    3.90    5.30
   1 -13  12   17.00    6.70
   1 -13 -12    2.70    5.70
  -1 -13  12   16.70    6.90
   2 -13  12    1.80    6.00
   2 -13 -12    0.00    6.40
  -2 -13  12    6.00    5.60
   0   0  13    0.90    2.60
   0   0  13   -1.00    1.10
   1   0  13   23.40    2.60
   1   0  13   22.00    4.10
  -1   0  13   34.80    5.00
  -1   0  13   22.30    5.30
   2   0  13   10.70    2.30
  -2   0  13   10.20    4.20
   2   0  13    9.30    2.90
   3   0  13   33.10    4.10
  -3   0  13   24.60    7.10
   3   0 -13   24.80    4.90
   3   0  13   35.60    4.10
  -3   0  13   20.80    5.80
  -4   0  13    6.50    4.40
   4   0 -13    2.00    2.90
  -4   0  13    3.30    5.00
   4   0  13    0.60    2.10
   5   0  13   38.60    5.10
  -5   0  13   34.40    9.60
  -5   0  13   43.10    8.60
   5   0 -13   43.60    6.60
  -6   0  13   99.99   12.10
   6   0 -13  114.49    9.10
   6   0 -13   92.89    9.50
   6   0  13  111.39    8.60
  -6   0  13  118.09   14.70
   7   0 -13   83.19    9.00
  -7   0  13  115.09   15.80
   7   0  13  106.79    9.10
   8   0 -13   20.50    5.70
   8   0  13   12.10    4.90
  -8   0  13   32.20   10.90
   0  -1  13  624.24   25.10
   0   1  13  664.93   26.40
   0  -1  13  623.14   27.70
   0   1  13  678.43   28.90
  -1   1  13 1489.15   59.09
   1  -1  13 1426.06   54.79
  -1   1  13 1373.36   60.69
   1  -1  13 1491.65   56.99
  -1  -1  13 1538.95   58.69
   1   1  13 1492.95   57.39
   1   1  13 1532.15   54.99
  -2   1  13  249.28   15.20
  -2   1  13  257.87   17.50
   2  -1  13  224.68   12.00
   2  -1  13  212.48   11.00
   2   1  13  214.58   12.00
   2  -1 -13  215.38   13.00
  -2  -1  13  268.17   17.10
   2   1  13  239.98   11.30
  -2  -1  13  258.57   14.80
  -3   1  13  653.93   31.10
  -3   1  13  597.84   33.10
   3  -1  13  598.54   25.70
   3  -1  13  629.74   25.90
  -3  -1  13  611.04   29.70
   3  -1 -13  606.84   28.30
  -3  -1  13  630.74   32.10
   3   1  13  637.84   26.00
   3   1  13  671.23   27.70
  -4   1  13  242.08   16.60
  -4   1  13  200.78   17.80
   4   1 -13  209.08   13.30
   4  -1  13  205.58   11.10
  -4  -1  13  203.98   16.60
  -4  -1  13  202.58   15.00
   4  -1 -13  203.18   13.50
   4   1  13  207.38   11.40
   5  -1  13   89.99    7.00
   5   1 -13   86.39    9.20
  -5   1  13   92.89   11.50
  -5   1  13   98.79   13.60
  -5  -1  13  100.49   11.20
  -5  -1  13   94.39   12.40
   5   1  13   84.59    6.90
   5  -1 -13  103.79    9.50
   6  -1  13   20.20    4.50
  -6   1  13   16.70    8.00
   6   1 -13   16.90    5.20
   6   1 -13   26.40    5.00
  -6  -1  13   16.10    7.10
   6  -1 -13   17.00    5.40
  -6  -1  13   25.30    7.50
   6   1  13   17.50    4.00
   6  -1 -13   18.50    5.00
   7  -1  13   43.90    6.50
   7   1 -13   35.00    6.30
  -7   1  13   53.19   12.80
   7   1  13   35.70    6.20
   7  -1 -13   40.20    7.00
  -7  -1  13   43.70   11.70
  -8   1  13  121.69   17.90
   8   1 -13  126.59   11.10
   8  -1  13  133.09   11.20
   8  -1 -13  120.19   11.30
   8   1  13  115.59   10.40
  -8  -1  13  136.49   18.60
   0   2  13 1593.54   58.99
   0  -2 -13 1495.55   58.49
   0  -2  13 1489.95   55.99
   0  -2  13 1532.75   59.09
  -1  -2 -13  227.18   11.70
  -1   2  13  209.38   15.20
   1  -2  13  216.38   11.90
   1  -2  13  217.28   10.30
  -1   2  13  226.28   14.20
  -1  -2  13  217.28   13.00
   1  -2 -13  221.68   12.60
   1   2  13  223.98   10.30
  -1  -2  13  196.18   13.30
   1   2  13  247.48   13.10
  -2   2  13   15.50    5.60
  -2   2  13    5.70    4.30
   2  -2  13   11.80    3.30
  -2  -2 -13   13.60    3.00
   2  -2  13   11.60    2.50
  -2  -2  13   16.40    5.50
   2  -2 -13   10.30    3.60
   2   2  13   11.90    3.20
  -2  -2  13   14.30    4.20
   2   2  13   14.00    2.50
   3  -2  13  109.89    7.20
   3  -2  13  119.79    7.80
  -3   2  13  123.39   12.70
  -3   2  13  124.39   11.40
  -3  -2  13  101.09    9.40
  -3  -2  13  125.19   11.60
   3   2  13  109.79    7.30
  -4   2  13  568.44   33.50
   4  -2  13  543.95   24.30
  -4   2  13  629.74   31.10
   4  -2  13  567.84   24.60
   4   2  13  593.14   25.00
   4  -2 -13  629.24   28.20
  -4  -2  13  594.04   30.70
  -4  -2  13  547.65   28.80
   5   2 -13   49.30    5.40
   5  -2  13   42.60    5.30
  -5   2  13   49.50   11.50
   5   2 -13   52.09    6.90
   5   2  13   51.99    5.20
  -5  -2  13   43.60    8.60
  -5  -2  13   34.60    8.60
   5  -2 -13   35.60    7.00
  -6   2  13   98.99   16.20
   6   2 -13   75.09    7.10
   6  -2  13   95.69    7.60
   6   2 -13   80.59    8.50
   6   2  13   84.79    7.60
   6  -2 -13   74.49    8.30
  -6  -2  13   84.39   12.10
   6  -2 -13   72.09    9.00
  -6  -2  13   80.19   11.00
   7  -2  13   24.40    5.40
  -7   2  13   20.60   10.00
   7   2 -13   19.90    4.90
   7  -2 -13   35.10    7.10
   7   2  13   29.80    5.60
  -7  -2  13   19.70    8.50
   7  -2 -13   33.50    6.60
  -8   2  13   56.49   14.50
   8  -2  13   61.69    8.20
   8   2  13   53.79    6.90
   8  -2 -13   79.49    9.70
   0   3  13  565.54   26.70
   0  -3  13  603.34   25.90
   0  -3  13  586.84   22.70
   0   3  13  594.94   27.40
   0  -3 -13  561.54   25.30
  -1   3  13   28.60    7.10
  -1  -3 -13   35.50    4.40
   1  -3  13   32.30    4.60
   1  -3  13   36.90    3.40
  -1   3  13   29.70    6.00
   1   3  13   36.50    3.30
   1   3  13   26.70    5.10
  -1  -3  13   41.50    5.30
   1  -3 -13   27.50    4.30
  -1  -3  13   30.70    5.50
  -2   3  13   32.00    6.50
   2  -3  13   28.10    4.20
  -2   3  13   26.00    8.10
   2  -3  13   33.30    3.60
  -2  -3 -13   26.20    3.70
   2   3  13   32.00    4.70
  -2  -3  13   33.50    6.40
   2   3  13   28.10    3.40
   2  -3 -13   22.60    4.90
  -2  -3  13   30.70    5.60
  -3   3  13    3.60    4.30
   3  -3  13    3.00    2.20
   3  -3  13    1.60    2.00
  -3   3  13   -1.70    4.10
  -3  -3  13    1.00    3.70
  -3  -3  13   -2.10    3.00
   3  -3 -13    0.10    2.80
   3   3  13    0.10    1.90
  -4   3  13   57.89   11.80
   4  -3  13   43.40    5.10
   4  -3  13   40.00    4.80
   4  -3 -13   53.09    6.70
  -4  -3  13   35.80    7.20
  -4  -3  13   44.20    7.70
   4   3  13   50.29    5.20
  -5   3  13   94.09   14.60
   5  -3  13  111.29    7.80
   5   3 -13  111.09    8.00
  -5  -3  13   98.99   12.20
   5   3  13  106.69    8.10
  -5  -3  13   82.09   10.50
   5  -3 -13  108.49   10.40
   6   3 -13  170.08   11.10
   6  -3  13  186.78   11.80
  -6   3  13  214.38   21.20
   6   3 -13  178.88   13.00
   6   3  13  183.78   11.50
   6  -3 -13  178.58   13.90
  -6  -3  13  192.38   18.20
  -7   3  13   50.49   13.40
   7  -3  13   29.10    6.00
   7   3  13   30.50    5.70
   7  -3 -13   41.60    7.50
   7  -3 -13   32.80    7.20
   8  -3  13  208.98   14.00
  -8   3  13  194.08   23.10
   8  -3 -13  174.18   14.60
   8   3  13  176.28   12.90
   0  -4  13  499.25   18.70
   0  -4  13  473.55   22.00
   0  -4 -13  442.36   21.50
   0   4  13  443.46   24.00
   1  -4  13   74.79    4.90
  -1   4  13   62.19    9.60
   1  -4  13   64.29    6.40
  -1  -4 -13   80.89    6.70
  -1  -4  13   58.99    6.90
   1  -4 -13   67.39    7.00
  -1  -4  13   87.09    7.20
   1   4  13   76.09    5.50
   2  -4  13 1009.70   40.80
  -2   4  13 1021.70   48.70
  -2  -4 -13 1014.00   39.70
   2  -4  13  987.00   38.90
   2   4  13 1011.00   38.90
   2  -4 -13 1025.70   42.50
  -2  -4  13 1043.10   43.30
  -2  -4  13 1011.70   42.40
  -3   4  13   70.89   10.80
   3  -4  13   85.59    5.90
   3  -4  13   74.59    6.70
  -3  -4  13   87.39    9.10
   3   4  13   71.69    5.70
  -3  -4  13   74.69    8.20
   3  -4 -13   76.99    8.30
   4  -4  13   44.20    5.10
   4  -4  13   55.49    5.80
  -4   4  13   59.29   12.80
   4   4  13   54.89    5.40
   4  -4 -13   52.99    7.60
  -4  -4  13   52.79    9.90
  -4  -4  13   38.20    7.40
  -5   4  13  121.49   16.30
   5  -4  13  137.99    9.10
   5  -4 -13  144.19   12.30
  -5  -4  13  150.28   12.60
   5   4  13  129.59    9.10
  -6   4  13   90.69   16.40
   6  -4  13  119.19    9.10
   6   4  13  116.79    9.00
   6  -4 -13  125.69   11.90
  -7   4  13   24.80   12.10
   7  -4  13   32.20    6.10
   7  -4 -13   41.50    7.80
   7   4  13   25.40    5.40
   7  -4 -13   46.30    8.40
   8  -4  13   11.20    4.70
  -8   4  13    1.10    9.40
   8  -4 -13    9.80    4.80
   8   4  13    4.80    3.80
   0   5  13    0.10    2.60
   0  -5  13    3.00    1.20
   0  -5 -13   -1.10    2.70
   0  -5  13    4.80    3.00
   1  -5  13   40.60    5.40
  -1  -5 -13   35.40    4.90
   1  -5  13   43.60    3.70
  -1   5  13   29.30    7.90
   1   5  13   44.20    5.20
   1  -5 -13   33.40    5.90
  -1  -5  13   42.00    5.80
  -1  -5  13   38.40    5.50
  -2   5  13  164.98   15.40
   2  -5  13  151.78    8.50
  -2  -5 -13  157.98    9.50
   2  -5  13  152.38   10.50
  -2  -5  13  167.68   11.30
   2   5  13  165.68    8.60
   2  -5 -13  164.08   11.80
   3  -5  13  155.58   10.70
   3  -5  13  160.08    9.10
  -3  -5  13  162.28   12.60
   3   5  13  163.18    9.00
   4  -5  13   21.80    4.10
  -4   5  13   24.40    9.00
   4  -5  13   14.50    4.00
   4   5  13   27.20    4.10
   4  -5 -13   21.20    6.00
  -4  -5  13    9.80    4.90
   5  -5  13   43.50    5.40
  -5   5  13   36.80   12.00
   5   5  13   36.80    5.00
  -5  -5  13   44.30    8.30
   5  -5 -13   38.50    7.70
   6  -5  13    7.00    3.80
  -6   5  13    6.80    9.50
   6  -5 -13   22.30    6.60
   6   5  13   13.90    4.10
   6  -5 -13   13.40    5.20
  -7   5  13  112.79   20.60
   7  -5  13   86.89    8.70
   7   5  13   68.19    7.80
   7  -5 -13   56.59   10.10
   7  -5 -13   81.99    9.60
  -8   5  13    7.30    7.80
   8  -5  13   19.90    5.70
   8   5  13   18.00    5.20
   8  -5 -13   15.30    5.50
   0  -6 -13   34.60    5.90
   0  -6  13   28.30    5.40
   1  -6  13  234.88   13.50
  -1   6  13  222.38   17.90
   1  -6  13  195.68    9.80
  -1  -6 -13  227.78   12.70
   1   6  13  199.98   13.80
  -1  -6  13  212.08   13.30
   1  -6 -13  222.58   13.90
   2  -6  13  162.68    8.80
   2  -6  13  165.58   11.10
  -2   6  13  167.88   16.50
  -2  -6 -13  151.58    9.70
   2  -6 -13  153.48   12.00
  -2  -6  13  140.79   11.10
   2   6  13  174.38    9.30
   3  -6  13  103.09    9.00
   3  -6  13   93.89    6.70
  -3   6  13   99.79   14.00
   3   6  13   98.59    6.50
   3  -6 -13   84.69    9.60
  -3  -6  13   86.29    8.90
   4  -6  13   14.30    4.20
   4  -6  13   21.40    4.00
  -4   6  13   10.20    8.10
   4  -6 -13   28.50    6.90
   4   6  13   15.80    3.40
  -4  -6  13   18.60    5.80
   5  -6  13   92.29    8.60
  -5   6  13   97.09   17.30
   5  -6  13  100.29    7.90
   5  -6 -13  111.39   11.30
   5   6  13   82.19    7.00
  -5  -6  13   89.49   10.70
   6  -6  13   81.69    7.70
  -6   6  13   55.19   13.10
   6   6  13   61.99    6.50
   6  -6 -13   75.39   10.20
   7  -6  13  173.58   12.60
  -7   6  13  150.68   21.90
   7  -6 -13  195.68   15.00
   7  -6 -13  189.48   16.20
   0  -7  13  105.69    9.20
   0  -7 -13   95.49    8.90
  -1   7  13  761.12   39.90
  -1  -7 -13  759.82   33.30
   1  -7  13  772.42   34.30
   1   7  13  727.43   36.40
  -1  -7  13  804.92   34.70
   1  -7 -13  788.02   35.00
   2  -7  13   53.19    4.50
  -2  -7 -13   37.40    5.10
  -2   7  13   65.19   11.90
   2  -7  13   44.70    6.40
   2   7  13   49.00    5.90
   2  -7 -13   46.40    7.70
  -3   7  13  354.36   25.80
   3  -7  13  315.47   17.80
   3  -7  13  305.57   14.70
  -3  -7  13  289.27   17.80
   3  -7 -13  344.37   19.90
   3   7  13  304.67   14.50
   4  -7  13   30.90    6.30
  -4   7  13   10.50    8.30
   4  -7  13   24.40    4.60
  -4  -7  13   26.50    6.60
   4  -7 -13   27.30    6.90
   4   7  13   25.90    4.10
   5  -7  13   21.20    5.60
   5  -7  13   15.80    4.20
  -5   7  13   22.80   10.60
   5   7  13   11.50    3.20
   5  -7 -13   16.60    6.00
  -5  -7  13    2.90    7.60
  -6   7  13    2.50    8.70
   6  -7  13    0.60    3.20
   6  -7 -13    8.10    4.40
   6  -7 -13    7.20    6.00
  -7   7  13   25.10   12.40
   7  -7  13   17.60    5.30
   7  -7 -13   20.40    6.80
   7  -7 -13   12.00    6.70
   0  -8 -13    8.20    4.30
   0  -8  13   -0.10    3.20
   0   8  13    3.00    5.60
  -1   8  13  139.79   14.90
   1  -8  13  141.89   11.30
  -1  -8 -13  140.89   10.50
  -1  -8  13  129.19   11.00
   1  -8 -13  135.59   11.70
   2  -8  13  296.87   17.10
  -2   8  13  330.87   23.80
  -2  -8  13  295.47   17.60
   2  -8 -13  277.77   18.00
   2   8  13  249.28   17.30
  -3   8  13    5.10    7.20
   3  -8  13   -2.00    3.40
  -3  -8  13   -4.80    2.90
   3  -8 -13   -1.60    3.80
   3   8  13    2.30    2.70
  -4   8  13  141.49   18.10
   4  -8  13  150.78   12.20
  -4  -8  13  120.49   11.60
   4  -8 -13  127.99   13.10
  -5   8  13  282.57   25.50
   5  -8  13  237.08   16.20
   5  -8  13  219.88   13.20
   6  -8  13  104.39    9.10
  -6   8  13  132.79   22.00
   6  -8 -13  116.19   11.20
   6  -8 -13   88.69   12.20
   7  -8 -13   17.00    6.40
   0  -9 -13   85.59    9.70
   0   9  13   70.69   10.90
   0  -9  13   83.19    9.30
  -1  -9 -13   77.99    9.10
  -1   9  13   75.79   13.20
   1  -9  13  109.79    9.80
   1  -9 -13   97.59   10.20
  -1  -9  13  102.19    9.90
   1   9  13   77.19   11.30
  -2   9  13   26.00    9.10
  -2  -9  13   25.80    6.50
   3  -9  13   15.40    5.40
  -3   9  13   -1.50    6.20
  -3  -9  13    9.10    5.20
   3  -9 -13   21.30    6.90
  -4   9  13  105.19   18.20
   4  -9 -13   82.29   11.50
  -4  -9  13   88.89   10.10
   5  -9  13   52.79    9.10
  -5   9  13   66.79   15.80
   5  -9 -13   75.99   11.30
   5  -9 -13   52.19    8.70
  -6   9  13  125.09   22.00
   6  -9 -13  131.59   12.30
   6  -9 -13  131.09   14.40
   0 -10 -13  518.45   27.00
   0 -10  13  497.55   26.80
   1 -10  13    9.60    5.00
  -1 -10 -13   10.30    5.20
   1 -10 -13   11.40    5.50
  -1 -10  13    6.00    4.40
  -2  10  13  103.79   14.20
   2 -10 -13   99.49   11.60
  -2 -10  13   94.39   10.50
   3 -10  13   40.00    8.40
  -3  10  13   51.49   12.20
  -3 -10  13   69.29    9.10
   3 -10 -13   51.79   10.00
   4 -10  13  173.88   15.00
  -4  10  13  143.69   18.80
  -4 -10  13  148.79   13.40
   4 -10 -13  142.89   14.90
  -5  10  13   -2.30    7.30
   5 -10  13    8.50    5.10
   5 -10 -13   -8.80    4.90
   5 -10 -13   -3.10    3.40
   0 -11 -13    7.30    5.50
   0 -11  13   18.90    6.60
   1 -11  13  140.89   13.20
  -1 -11 -13  157.08   12.90
  -1 -11  13  145.79   13.30
   1 -11 -13  174.98   15.00
   2 -11  13   -0.10    4.50
   2 -11 -13   -3.60    4.80
  -2 -11  13    7.60    5.40
   3 -11  13   66.49   10.20
   3 -11 -13   53.39   11.00
  -3 -11  13   70.89    9.70
   4 -11  13   17.00    6.40
  -4  11  13    7.30    9.00
   4 -11 -13   21.90    8.50
   4 -11 -13   15.20    5.30
  -5  11  13   60.99   15.10
   5 -11  13   43.90    9.40
   5 -11 -13   39.10    7.60
   5 -11 -13   64.79   12.70
   0 -12 -13    1.20    5.70
   0 -12  13   -3.00    4.10
   1 -12  13   54.79    9.90
   1 -12 -13   51.09   10.30
  -1 -12  13   41.30    8.70
   2 -12  13   50.49    9.80
  -2 -12  13   58.29    9.80
   2 -12 -13   54.19   10.50
   3 -12  13    7.60    6.10
  -3 -12  13   14.10    6.90
   3 -12 -13   20.50    8.70
   4 -12  13   65.79   11.60
   4 -12 -13   51.99   11.80
   0 -13 -13   88.29   11.80
   0 -13  13  104.49   12.80
   1 -13  13   64.79   11.40
   1 -13 -13   83.99   12.20
  -1 -13  13   85.69   11.50
   2 -13  13   11.30    6.90
   2 -13 -13   -5.30    5.40
  -2 -13  13    6.20    5.30
   0   0  14 1151.08   44.40
   0   0  14 1194.58   47.60
   1   0  14  661.13   27.50
   1   0  14  629.44   24.90
  -1   0  14  617.04   28.60
  -1   0  14  585.64   29.80
   2   0  14  138.09    9.20
   2   0  14  146.99    8.30
  -2   0  14  149.19   11.60
  -3   0  14 1060.69   48.90
  -3   0  14 1084.39   46.20
   3   0  14 1004.20   40.70
   3   0 -14 1058.29   43.50
   3   0  14 1021.60   41.00
   4   0 -14    5.30    4.00
  -4   0  14   11.30    6.10
   4   0  14   15.30    3.20
  -4   0  14   23.50    6.80
  -5   0  14  266.77   21.90
  -5   0  14  303.07   21.20
   5   0 -14  337.07   18.50
   5   0  14  297.57   15.50
   6   0 -14    1.90    3.20
   6   0  14    6.50    2.80
  -6   0  14    4.10    6.60
  -6   0  14   -0.20    5.10
   6   0 -14    3.10    3.30
   7   0 -14  207.58   14.20
   7   0  14  221.98   13.80
  -7   0  14  203.58   20.90
  -8   0  14   21.40   10.00
   8   0  14   28.30    6.40
   8   0 -14   29.80    7.00
   0  -1  14   62.49    6.40
   0   1  14   66.19    5.40
   0  -1  14   61.59    4.40
   0   1  14   62.89    7.00
  -1   1  14   83.79    7.90
   1  -1  14   77.59    5.20
  -1   1  14   77.69    9.20
   1  -1  14   78.99    6.90
  -1  -1  14   79.99    7.80
   1   1  14   80.19    5.10
  -1  -1  14   68.19    8.00
   1   1  14   92.49    7.40
  -2   1  14  557.34   27.50
  -2   1  14  541.75   30.10
   2  -1  14  559.24   24.30
   2  -1  14  563.44   23.20
   2  -1 -14  531.45   25.20
  -2  -1  14  561.24   26.80
   2   1  14  546.95   24.50
   2   1  14  588.94   23.30
  -2  -1  14  572.14   29.70
  -3   1  14  196.78   15.00
  -3   1  14  188.08   17.00
   3  -1  14  219.78   11.50
   3  -1  14  216.48   11.10
   3   1  14  217.68   11.30
   3   1  14  201.08   11.30
   3  -1 -14  199.28   13.20
  -3  -1  14  200.08   14.40
  -3  -1  14  240.88   17.20
  -4   1  14  135.19   14.00
  -4   1  14   83.09   10.70
   4   1 -14  108.69    9.50
   4  -1  14  107.89    7.70
  -4  -1  14   95.79   11.10
   4   1  14   98.99    7.30
   4  -1 -14  116.59    9.50
  -4  -1  14  118.99   12.90
  -5   1  14  430.96   28.20
   5  -1  14  367.26   18.80
  -5   1  14  427.76   25.20
   5   1 -14  399.76   21.60
  -5  -1  14  413.96   24.60
   5  -1 -14  410.26   22.00
   5   1  14  406.26   19.30
  -5  -1  14  396.76   25.90
  -6   1  14   63.19   13.50
   6   1 -14   69.19    8.70
   6  -1  14   50.39    5.80
   6   1 -14   52.29    6.40
  -6  -1  14   53.09   11.60
   6  -1 -14   52.39    7.10
   6   1  14   51.19    6.30
  -6  -1  14   70.79   10.70
   6  -1 -14   68.49    8.60
   7  -1  14  133.39   10.50
   7   1 -14  144.19   11.30
  -7   1  14  130.99   17.70
  -7  -1  14  140.09   16.70
   7  -1 -14  109.39   10.60
  -8   1  14   40.20   12.50
   8   1 -14   20.80    5.70
  -8  -1  14   42.20   11.90
   8  -1 -14   32.70    7.30
   8   1  14   35.90    6.60
   0  -2 -14   38.00    5.00
   0  -2  14   44.80    5.70
   0  -2  14   46.20    3.60
   0   2  14   48.50    6.50
   0   2  14   48.50    5.50
   1  -2  14  189.08   11.20
  -1   2  14  189.28   14.90
  -1   2  14  187.68   13.20
   1  -2  14  185.38    9.30
  -1  -2 -14  212.38   11.00
  -1  -2  14  178.58   12.60
   1  -2 -14  191.88   11.70
  -1  -2  14  192.58   12.00
   1   2  14  188.78   11.80
   2  -2  14  383.46   16.50
   2  -2  14  392.06   18.00
  -2  -2 -14  361.16   16.80
  -2   2  14  380.96   21.40
  -2   2  14  380.66   24.00
   2   2  14  360.86   18.00
  -2  -2  14  357.96   21.50
   2  -2 -14  389.16   19.00
   2   2  14  347.47   16.10
  -2  -2  14  355.76   19.50
  -3   2  14  117.69   13.50
  -3   2  14  104.49   10.80
   3  -2  14  105.99    7.50
   3  -2  14   89.59    6.70
  -3  -2  14   84.69    9.20
  -3  -2  14   93.39   10.60
   3   2  14  103.49    6.80
   3  -2 -14   99.49    9.00
  -4   2  14  802.42   40.70
  -4   2  14  699.23   35.80
   4  -2  14  694.33   30.00
   4  -2  14  683.63   29.80
   4  -2 -14  757.02   33.70
   4   2  14  738.13   30.30
  -4  -2  14  735.63   35.10
  -4  -2  14  762.92   37.00
   5   2 -14  185.78   13.10
  -5   2  14  193.98   19.20
   5  -2  14  192.48   11.10
   5   2  14  167.88   11.00
  -5  -2  14  185.98   17.00
  -5  -2  14  191.08   15.60
   5  -2 -14  200.98   14.10
   6  -2  14  124.59    9.50
  -6   2  14  143.99   17.50
   6   2 -14  124.09   11.00
   6   2 -14  131.49    9.40
   6  -2 -14  112.79   11.20
  -6  -2  14  142.19   14.50
   6   2  14  122.59    9.10
  -6  -2  14  104.19   13.60
   7   2 -14   71.99    7.80
  -7   2  14  108.99   15.20
   7  -2  14   73.79    7.60
   7   2  14   84.59    7.80
   7  -2 -14   60.89    7.70
   7  -2 -14   84.79   10.00
  -7  -2  14   83.29   14.50
   8  -2  14   77.09    9.20
  -8   2  14   96.99   18.60
   8  -2 -14  105.99   10.70
   8   2  14   75.69    8.60
   0   3  14  994.30   44.00
   0  -3  14 1095.39   39.70
   0  -3  14 1088.09   42.90
   0  -3 -14 1011.90   42.40
   0   3  14 1080.19   44.70
  -1   3  14    7.90    4.00
   1  -3  14    5.90    2.80
  -1  -3 -14    3.70    2.40
   1  -3  14    7.90    2.00
  -1   3  14    2.90    3.40
   1  -3 -14    6.90    3.00
   1   3  14    5.20    3.00
  -1  -3  14   10.30    3.70
   1   3  14    6.10    1.70
  -1  -3  14    7.90    3.60
   2  -3  14  634.64   25.70
   2  -3  14  651.63   27.50
  -2   3  14  654.83   31.20
  -2   3  14  614.44   34.10
  -2  -3 -14  605.84   26.00
   2   3  14  636.04   25.60
   2  -3 -14  638.94   28.70
  -2  -3  14  602.44   28.90
  -3   3  14   -0.30    4.00
   3  -3  14   -2.20    2.30
   3  -3  14    1.70    2.00
  -3   3  14   -4.10    5.00
   3   3  14   -0.50    1.90
  -3  -3  14    2.90    4.40
  -3  -3  14    8.50    4.30
   3  -3 -14    0.00    3.10
  -4   3  14  208.28   19.30
   4  -3  14  165.28   10.70
   4  -3  14  188.48   10.70
   4  -3 -14  191.98   13.30
   4   3  14  191.68   10.90
  -4  -3  14  185.88   14.30
  -5   3  14  122.99   16.10
   5   3 -14   75.19    7.00
   5  -3  14  103.69    7.90
   5  -3 -14   80.99    9.30
  -5  -3  14  100.99   12.40
   5   3  14   82.19    7.30
  -5  -3  14   84.49   11.40
   6  -3  14   82.79    7.80
  -6   3  14   50.99   13.70
   6   3 -14   70.49    8.30
   6   3 -14   74.29    7.00
  -6  -3  14   92.69   19.40
   6  -3 -14   69.99    9.50
   6   3  14   92.99    8.00
  -7   3  14   24.60   12.00
   7  -3  14   15.30    4.90
   7  -3 -14   27.10    6.30
   7   3  14   13.80    4.50
   7  -3 -14   11.30    5.70
   8  -3  14   34.90    7.00
  -8   3  14   14.90   10.20
   8  -3 -14   24.90    6.80
   0  -4  14   48.80    5.90
   0   4  14   38.10    7.30
   0  -4 -14   35.70    5.20
   0  -4  14   39.50    3.20
   1  -4  14  101.09    8.20
  -1  -4 -14   91.89    7.30
  -1   4  14  115.19   12.40
   1  -4  14   96.99    6.00
   1   4  14  104.39    6.90
  -1  -4  14   91.09    8.10
   1  -4 -14   96.19    8.00
  -1  -4  14  103.49    8.70
   2  -4  14  264.37   14.20
   2  -4  14  245.78   12.20
  -2  -4 -14  257.27   13.00
  -2   4  14  240.18   19.60
  -2  -4  14  249.78   15.20
   2   4  14  257.77   12.10
   2  -4 -14  269.57   15.50
  -2  -4  14  234.38   15.80
  -3   4  14  256.87   19.90
   3  -4  14  225.58   12.50
   3  -4  14  197.38   11.00
   3   4  14  221.28   11.30
  -3  -4  14  197.28   13.90
  -3  -4  14  201.38   14.70
   3  -4 -14  214.08   14.30
   4  -4  14  111.59    8.70
   4  -4  14  105.39    7.80
  -4  -4  14  130.69   11.80
   4   4  14  113.99    8.00
   4  -4 -14  125.39   11.00
  -5   4  14  178.18   19.50
   5  -4  14  161.18   10.60
   5   4  14  171.58   10.80
  -5  -4  14  172.98   14.10
   5  -4 -14  185.98   14.20
   6  -4  14  167.58   11.10
  -6   4  14  160.38   19.90
   6  -4 -14  157.78   13.60
   6   4  14  143.79   10.40
   7  -4  14    1.90    3.40
  -7   4  14    2.90    9.50
   7  -4 -14    7.00    5.10
   7  -4 -14    5.40    4.30
   7   4  14    1.20    2.90
   8  -4  14   34.70    7.00
  -8   4  14   51.59   15.30
   8   4  14   37.80    6.70
   8  -4 -14   38.30    8.20
   0  -5  14  552.84   25.00
   0   5  14  492.05   27.60
   0  -5 -14  536.85   24.50
   0  -5  14  515.45   20.60
  -1  -5 -14  278.97   14.80
  -1   5  14  279.27   20.30
   1  -5  14  298.17   15.60
   1  -5  14  258.27   12.30
   1   5  14  273.07   15.00
  -1  -5  14  256.77   15.40
   1  -5 -14  307.37   16.40
  -1  -5  14  285.77   15.90
  -2  -5 -14  304.67   15.70
   2  -5  14  340.77   17.40
   2  -5  14  334.37   15.10
  -2   5  14  332.87   23.30
   2   5  14  337.97   15.00
   2  -5 -14  336.27   18.30
  -2  -5  14  323.37   18.10
  -3   5  14  176.38   18.40
   3  -5  14  187.68   11.90
   3  -5  14  192.38   10.50
  -3  -5  14  205.48   14.00
   3   5  14  196.28   10.40
   3  -5 -14  185.28   13.70
  -4   5  14  161.18   18.20
   4  -5  14  168.98   11.50
   4  -5  14  170.38   10.10
  -4  -5  14  172.68   13.80
   4  -5 -14  166.08   13.20
   4   5  14  157.98    9.70
  -5   5  14   44.90   11.40
   5  -5  14   63.89    6.60
  -5  -5  14   76.09   10.20
   5   5  14   68.69    6.50
   5  -5 -14   81.79    9.80
   6  -5  14    0.90    3.20
  -6   5  14   10.40    7.70
   6  -5 -14    7.40    4.10
   6  -5 -14    3.30    4.20
   6   5  14    6.90    3.20
   7  -5  14  110.59    9.80
   7   5  14   95.49    8.70
   7  -5 -14   87.49   11.40
   7  -5 -14  114.59   11.20
   0   6  14   21.80    7.10
   0  -6  14   16.50    4.50
   0  -6 -14   16.20    4.40
   1  -6  14   92.69    8.20
   1  -6  14   96.49    5.80
  -1  -6 -14   94.69    8.00
  -1   6  14  118.89   13.30
   1  -6 -14  102.19    9.20
  -1  -6  14  109.89    9.40
   1   6  14   77.79    8.90
   2  -6  14  110.99    9.00
  -2   6  14  135.99   15.10
  -2  -6 -14  104.99    8.20
   2  -6  14  118.59    7.30
   2   6  14  111.99    7.50
  -2  -6  14   99.99    9.60
   2  -6 -14  123.09   10.60
   3  -6  14  213.08   11.40
   3  -6  14  227.48   14.10
  -3   6  14  246.58   21.40
   3  -6 -14  210.88   15.00
  -3  -6  14  212.18   14.60
   3   6  14  206.28   11.00
  -4   6  14  120.59   16.20
   4  -6  14   85.39    7.00
  -4  -6  14   95.79   10.10
   4  -6 -14   74.89    9.80
   4   6  14   81.39    6.70
   5  -6  14  117.29   10.50
  -5   6  14  124.59   16.50
   5  -6  14  110.99    8.50
   5   6  14  104.59    7.90
  -5  -6  14   88.99   11.80
   5  -6 -14   97.79   11.10
   6  -6  14   49.40    6.50
  -6   6  14   51.19   14.70
   6  -6 -14   48.30    9.30
   6  -6 -14   38.00    7.40
   6   6  14   46.30    5.80
   7  -6  14  199.38   13.60
  -7   6  14  234.38   25.90
   7  -6 -14  194.68   15.40
   7   6  14  193.98   12.90
   0  -7  14    9.30    4.00
   0   7  14   10.00    6.10
  -1   7  14   31.40    8.50
   1  -7  14   22.50    5.10
  -1  -7 -14   24.90    5.30
   1   7  14   21.60    6.10
  -1  -7  14   22.30    5.70
   1  -7 -14   26.40    5.90
  -2   7  14   74.19   13.10
   2  -7  14   60.39    7.50
  -2  -7  14   58.49    7.70
   2  -7 -14   61.09    8.10
   2   7  14   59.49    6.70
  -3   7  14   38.70   11.20
   3  -7  14   60.19    5.70
   3  -7  14   59.39    7.60
   3   7  14   55.09    5.10
  -3  -7  14   75.69    8.70
   3  -7 -14   65.99    8.90
   4  -7  14    6.40    3.70
   4  -7  14    8.90    3.30
   4  -7 -14   -0.40    4.10
  -4  -7  14    7.80    4.90
   4   7  14    5.20    2.50
   5  -7  14   35.20    6.70
   5  -7  14   27.70    5.20
  -5   7  14   12.70    9.50
  -5  -7  14   43.60    8.70
   5   7  14   31.00    4.60
   5  -7 -14   42.70    9.00
  -6   7  14   42.60   14.20
   6  -7  14   41.90    6.30
   6  -7 -14   38.00    7.40
   6  -7 -14   52.09   10.10
  -7   7  14   45.40   15.20
   7  -7  14   75.49    8.50
   7  -7 -14   50.39    9.20
   0  -8  14   41.20    6.20
   0  -8 -14   46.70    8.00
   0   8  14   36.60    9.60
   1  -8  14  199.38   13.80
  -1  -8 -14  182.28   12.60
  -1   8  14  146.99   16.10
   1   8  14  162.18   15.00
   1  -8 -14  196.58   13.50
  -1  -8  14  184.48   13.40
   2  -8  14   38.80    6.90
  -2   8  14   18.60    8.40
   2   8  14   26.60    6.80
  -2  -8  14   28.10    6.40
   2  -8 -14   33.00    7.60
  -3   8  14  109.49   15.60
  -3  -8  14   94.79   10.00
   3   8  14   93.09    7.90
   3  -8 -14  113.69   11.50
  -4   8  14   85.89   16.30
   4  -8  14   72.69    8.70
  -4  -8  14   73.39    9.40
   4  -8 -14   84.59   10.50
  -5   8  14   76.59   16.60
   5  -8  14  112.29    9.30
   5  -8  14  117.29   10.80
   5  -8 -14  149.99   14.40
  -6   8  14   20.90   11.70
   6  -8  14   21.80    5.40
   6  -8 -14   25.10    6.70
   6  -8 -14   20.80    7.90
   0  -9  14  488.25   26.00
   0  -9 -14  493.25   25.60
   0   9  14  520.95   30.70
  -1   9  14   21.60    8.10
  -1  -9 -14   25.20    5.90
   1  -9  14   29.10    6.80
  -1  -9  14   21.30    6.00
   1  -9 -14   33.80    7.30
   1   9  14   17.50    6.20
   2  -9  14  175.18   13.30
  -2   9  14  127.99   16.30
  -2  -9  14  155.48   13.10
   2  -9 -14  170.78   13.80
   2   9  14  125.19   16.00
   3  -9  14    1.80    3.80
  -3   9  14   -1.70    6.40
   3  -9 -14    0.60    4.20
  -3  -9  14    1.40    4.00
   4  -9  14  275.57   18.10
  -4   9  14  302.77   26.30
  -4  -9  14  261.77   18.20
   4  -9 -14  275.77   20.00
   5  -9  14    0.20    4.40
  -5   9  14   -0.70    7.60
   5  -9 -14    0.50    5.60
   5  -9 -14    1.00    4.30
  -6   9  14   74.69   17.70
   6  -9 -14   86.19   13.60
   6  -9 -14   91.19   10.30
   0 -10  14   12.30    5.50
   0 -10 -14   10.90    5.50
  -1  10  14   48.40   11.40
   1 -10  14   67.59    9.20
  -1 -10 -14   53.09    8.10
   1 -10 -14   63.79    9.40
  -1 -10  14   68.29    9.20
   2 -10  14   83.89   10.00
  -2  10  14   65.89   13.40
  -2 -10  14   85.19   10.50
   2 -10 -14   95.39   10.60
  -3  10  14   21.10    9.50
   3 -10  14   36.90    7.80
   3 -10 -14   45.50    9.30
  -3 -10  14   26.20    7.00
  -4  10  14  162.88   20.10
   4 -10  14  153.28   13.80
   4 -10 -14  165.78   15.70
  -4 -10  14  147.89   13.70
   5 -10  14   35.50    7.60
  -5  10  14   24.20   11.70
   5 -10 -14   45.30   10.20
   5 -10 -14   19.10    5.80
   0 -11 -14  193.28   15.60
   0 -11  14  204.28   15.70
   1 -11  14    8.20    5.60
  -1 -11 -14    4.60    4.70
  -1 -11  14    9.50    5.70
   1 -11 -14    0.40    5.20
   2 -11  14  221.68   16.90
  -2 -11  14  231.88   17.30
  -3  11  14   34.90   11.10
   3 -11  14   40.10    8.50
  -3 -11  14   28.70    7.50
  -4  11  14   37.30   12.80
   4 -11  14   39.30    8.80
  -4 -11  14   49.90   11.70
   0 -12 -14   18.00    6.40
   0 -12  14    7.70    5.40
   1 -12  14   27.60    8.30
  -1 -12  14   31.00    7.70
   1 -12 -14   43.80    9.60
   2 -12  14   16.00    6.30
  -2 -12  14    8.80    6.10
   2 -12 -14    7.10    6.90
   3 -12  14   75.59   11.00
   3 -12 -14   96.59   13.30
  -3 -12  14   84.39   11.90
   0 -13  14   11.20    6.40
   0 -13 -14   16.40    7.60
   1 -13  14    9.60    6.60
  -1 -13  14    7.00    5.60
   1 -13 -14    5.50    6.50
   2 -13 -14   42.30   10.20
   0   0  15    1.30    2.90
   0   0  15    0.50    1.50
   1   0  15  147.99   10.10
   1   0  15  142.09    7.80
  -1   0  15  167.88   11.50
  -1   0  15  127.19   11.30
   2   0  15   58.49    5.10
   2   0  15   70.09    6.40
  -2   0  15   61.69   10.40
  -2   0  15   72.39    8.50
  -3   0  15  162.68   13.20
   3   0 -15  149.69   10.80
   3   0  15  155.38    9.00
   3   0  15  141.19    9.20
  -3   0  15  129.59   14.20
   4   0 -15   30.60    6.20
  -4   0  15   45.20   14.70
  -4   0  15   28.50    7.30
   4   0  15   35.40    4.70
   5   0  15  251.37   13.50
   5   0 -15  228.48   15.50
  -5   0  15  206.08   17.50
   6   0  15   10.90    3.80
   6   0 -15    5.60    4.30
   6   0 -15   15.80    4.60
  -6   0  15    0.80    6.70
  -6   0  15   15.30    7.90
  -7   0  15  277.77   24.40
   7   0  15  274.87   16.00
   7   0 -15  253.87   16.30
   8   0 -15   34.10    7.30
   8   0  15   48.10    7.90
  -8   0  15   34.80   11.50
   0  -1  15  267.77   12.30
   0  -1  15  266.07   14.90
   0   1  15  277.17   13.70
   0   1  15  231.98   14.90
  -1   1  15  190.58   14.20
  -1   1  15  147.29   11.70
   1  -1  15  174.28    8.60
   1  -1  15  159.18   10.40
   1   1  15  163.78   10.80
  -1  -1  15  159.48   11.60
   1   1  15  153.58    8.30
  -1  -1  15  137.29   11.70
  -2   1  15   30.90    8.50
   2  -1  15   52.19    5.80
  -2   1  15   35.60    6.90
   2  -1  15   40.50    4.30
   2   1  15   49.10    4.50
   2   1  15   39.80    5.50
  -2  -1  15   33.10    8.10
   2  -1 -15   44.70    5.50
  -2  -1  15   58.09    7.60
  -3   1  15  496.05   29.10
   3  -1  15  445.76   20.90
   3  -1  15  442.36   20.30
  -3   1  15  447.96   25.40
  -3  -1  15  434.86   24.50
   3  -1 -15  496.55   23.60
   3   1  15  464.25   20.50
  -3  -1  15  504.95   27.90
  -4   1  15   43.50    9.10
   4   1 -15   55.19    7.40
   4  -1  15   57.29    5.80
  -4   1  15   51.29   11.20
   4   1  15   61.19    6.00
  -4  -1  15   50.69   10.30
   4  -1 -15   63.09    7.80
  -4  -1  15   49.30    9.20
  -5   1  15  175.38   16.40
   5  -1  15  226.08   12.30
   5   1 -15  196.28   14.20
  -5   1  15  177.58   17.90
  -5  -1  15  220.38   18.80
   5   1  15  201.98   12.10
   5  -1 -15  218.18   14.80
  -5  -1  15  202.68   16.80
   6   1 -15  180.38   13.70
   6  -1  15  182.78   11.70
  -6   1  15  182.88   19.60
  -6  -1  15  212.88   19.30
   6   1  15  146.89   11.10
  -6  -1  15  176.48   16.30
   7  -1  15   84.99    8.70
   7   1 -15   87.69    8.90
  -7   1  15   84.69   15.80
   7  -1 -15   99.59   11.20
   7  -1 -15   80.79    9.10
   7   1  15   92.79    8.80
  -7  -1  15  104.89   15.20
  -8   1  15   -5.20    7.20
   8  -1  15    8.60    4.60
   8   1 -15   10.70    4.70
  -8  -1  15    5.60    8.40
   8   1  15    8.70    4.80
   8  -1 -15   10.10    4.70
   0   2  15  292.47   16.40
   0  -2  15  281.57   15.40
   0   2  15  256.27   14.70
   0  -2  15  280.87   12.40
   0  -2 -15  256.77   14.30
  -1   2  15  429.66   25.70
  -1   2  15  500.15   24.60
  -1  -2 -15  459.05   20.90
   1  -2  15  448.26   19.30
   1  -2  15  505.75   22.10
   1  -2 -15  429.86   21.80
   1   2  15  484.15   22.80
  -1  -2  15  445.56   23.60
   1   2  15  484.05   19.50
  -1  -2  15  465.35   22.70
  -2  -2 -15 1425.56   55.49
  -2   2  15 1467.95   61.09
  -2   2  15 1487.25   64.89
   2  -2  15 1411.36   54.89
   2  -2  15 1455.35   56.69
   2  -2 -15 1448.46   57.99
   2   2  15 1437.66   57.19
  -2  -2  15 1531.65   62.49
   2   2  15 1452.35   54.99
  -2  -2  15 1491.25   59.49
   3  -2  15   45.00    5.20
  -3   2  15   36.00    7.30
   3  -2  15   45.50    4.90
  -3   2  15   30.30    9.40
  -3  -2  15   40.50    7.50
   3  -2 -15   45.80    6.10
   3   2  15   44.80    6.70
  -3  -2  15   45.90    9.60
   3   2  15   44.50    4.40
  -4   2  15  209.28   19.30
  -4   2  15  184.38   15.40
   4  -2  15  154.88   10.80
   4  -2  15  168.68   10.40
   4   2  15  180.38   10.70
  -4  -2  15  179.68   15.70
   4  -2 -15  184.08   13.20
  -4  -2  15  180.88   14.50
   5  -2  15   60.89    6.40
   5   2 -15   65.19    8.00
  -5   2  15   58.89   12.90
  -5  -2  15   89.09   11.90
   5  -2 -15   61.69    8.30
   5   2  15   55.29    6.30
  -5  -2  15   62.69   10.50
  -6   2  15    5.80    8.10
   6  -2  15   19.20    4.70
   6   2 -15   12.20    3.60
   6  -2 -15   12.60    5.00
   6   2  15   13.50    4.00
  -6  -2  15   20.10    7.40
   6  -2 -15   23.30    6.00
   7  -2  15  109.19    9.70
   7   2 -15  117.89   10.10
  -7   2  15  114.99   19.10
   7   2  15   89.29    8.50
  -7  -2  15  101.99   14.40
   7  -2 -15  119.09   10.70
   7  -2 -15   83.89   10.50
  -8   2  15   57.49   15.00
   8  -2  15   45.90    7.70
   8   2  15   34.90    6.80
   8  -2 -15   35.90    7.70
   0   3  15   42.20    6.40
   0  -3  15   40.70    5.70
   0   3  15   37.90    6.60
   0  -3  15   39.50    3.40
   0  -3 -15   48.20    5.70
  -1   3  15   40.00    7.40
   1  -3  15   52.59    6.10
  -1  -3 -15   54.69    5.60
   1  -3  15   61.19    4.40
  -1   3  15   61.99    9.50
   1   3  15   53.09    4.50
   1  -3 -15   41.50    6.10
  -1  -3  15   41.10    6.40
   1   3  15   62.49    6.90
  -1  -3  15   53.99    6.80
  -2  -3 -15  608.04   25.20
   2  -3  15  615.14   26.30
  -2   3  15  531.25   32.10
  -2   3  15  586.44   29.90
   2  -3  15  594.84   24.40
   2   3  15  629.24   24.50
   2  -3 -15  619.44   27.80
  -2  -3  15  560.14   27.80
   2   3  15  566.74   26.50
  -2  -3  15  528.95   29.30
   3  -3  15  130.19    8.40
  -3   3  15  125.99   12.60
   3  -3  15  151.18    9.80
  -3   3  15  171.08   16.90
   3  -3 -15  139.19   11.20
   3   3  15  147.89    8.90
  -3  -3  15  150.28   13.30
   4  -3  15   26.20    4.50
   4  -3  15   29.80    5.00
  -4   3  15   27.20    8.50
  -4  -3  15   41.30    8.50
  -4  -3  15   37.30    7.90
   4   3  15   30.30    4.50
   4  -3 -15   29.60    6.70
   5  -3  15   51.49    5.80
  -5   3  15   28.80   10.50
   5  -3 -15   30.90    6.80
  -5  -3  15   47.80    9.70
   5   3  15   42.30    5.50
  -5  -3  15   42.40    9.20
  -6   3  15  197.68   21.50
   6  -3  15  193.08   12.40
   6   3 -15  206.28   14.70
   6   3  15  192.78   12.30
  -6  -3  15  186.28   17.00
   6  -3 -15  168.28   13.30
   7  -3  15   17.40    4.90
  -7   3  15   28.00   12.10
   7  -3 -15   16.30    5.60
   7   3  15   14.00    4.60
   7  -3 -15   11.00    5.40
   8  -3  15   58.29    8.40
  -8   3  15   80.29   16.80
   8  -3 -15   57.79    8.30
   8   3  15   53.59    7.50
   0   4  15  675.03   34.30
   0  -4  15  740.03   32.10
   0  -4 -15  740.63   31.80
   0   4  15  734.03   33.70
   0  -4  15  754.12   28.40
  -1  -4 -15  183.58   11.50
   1  -4  15  214.48   12.60
   1  -4  15  217.58    9.90
  -1   4  15  194.48   14.00
  -1   4  15  201.58   16.90
   1  -4 -15  195.88   12.40
  -1  -4  15  193.38   12.90
   1   4  15  196.98   10.90
  -1  -4  15  172.78   12.90
   2  -4  15  336.37   17.00
  -2  -4 -15  298.67   15.40
   2  -4  15  296.87   14.60
   2  -4 -15  338.67   18.30
  -2  -4  15  356.46   19.60
  -2  -4  15  305.07   18.10
   2   4  15  328.57   14.70
  -3   4  15  411.26   27.50
   3  -4  15  368.46   18.60
   3  -4  15  383.86   17.40
   3   4  15  380.66   17.30
   3  -4 -15  378.76   20.80
  -3  -4  15  347.97   20.60
   4  -4  15  434.66   21.60
   4  -4  15  476.95   21.00
  -4   4  15  439.46   30.80
   4   4  15  456.65   20.80
  -4  -4  15  433.96   25.30
   4  -4 -15  492.15   24.90
  -5   4  15    6.40    6.20
   5  -4  15    0.00    2.60
   5  -4 -15    4.70    4.50
  -5  -4  15   -3.20    3.70
   5   4  15    3.10    2.70
   6   4 -15   50.49   12.20
  -6   4  15   39.50   12.40
   6  -4  15   50.59    6.60
   6  -4 -15   51.29    9.20
   6   4  15   39.60    5.90
   6  -4 -15   40.80    7.50
  -7   4  15  136.89   20.00
   7  -4  15  106.89    9.60
   7  -4 -15  101.69   11.50
   7  -4 -15   84.29    9.90
   7   4  15   76.69    8.20
   0  -5 -15  182.68   11.80
   0   5  15  161.88   14.20
   0  -5  15  183.88   11.80
   0  -5  15  168.68    8.40
   1  -5  15  629.04   25.70
  -1   5  15  691.73   36.00
  -1  -5 -15  687.83   28.90
  -1  -5  15  635.44   29.90
   1   5  15  693.83   29.70
  -1  -5  15  630.34   29.70
   1  -5 -15  606.44   29.40
   2  -5  15  311.47   16.60
  -2   5  15  326.57   23.10
   2  -5  15  280.77   14.00
   2  -5 -15  314.77   18.00
   2   5  15  314.07   14.30
  -2  -5  15  296.37   17.60
  -3   5  15  104.39   14.80
   3  -5  15  133.09    8.50
   3   5  15  143.29    8.40
  -3  -5  15  145.09   12.10
  -4   5  15   63.69   13.50
   4  -5  15   47.00    5.40
   4  -5  15   45.10    6.10
  -4  -5  15   53.29    9.00
   4   5  15   52.49    5.40
   4  -5 -15   38.50    7.10
  -5   5  15   84.09   15.90
   5  -5  15   95.89    7.90
  -5  -5  15   62.89    9.80
   5   5  15   89.49    7.50
  -6   5  15   40.00   12.20
   6  -5 -15   30.00    7.80
   6   5  15   31.40    5.50
   6  -5 -15   26.60    6.20
  -7   5  15   51.79   14.80
   7  -5  15   42.30    7.10
   7   5  15   26.90    5.70
   7  -5 -15   44.30    8.30
   7  -5 -15   37.00    8.80
   0  -6 -15  155.78   11.10
   0  -6  15  154.78   11.40
   0   6  15  134.19   13.80
   1  -6  15  148.39   10.90
   1  -6  15  134.89    7.40
  -1   6  15  130.29   14.60
  -1  -6 -15  127.39    9.80
   1   6  15  135.59   11.70
   1  -6 -15  134.59   10.90
  -1  -6  15  141.79   11.10
   2  -6  15  141.39   10.60
   2  -6  15  126.99    7.70
  -2  -6 -15  118.49    8.90
  -2   6  15  135.19   15.60
  -2  -6  15  117.59   10.40
   2   6  15  129.89    8.60
   2  -6 -15  134.39   10.70
   3  -6  15    2.60    3.50
   3  -6  15    3.70    2.50
  -3   6  15   17.30    8.00
   3   6  15    3.50    2.10
  -3  -6  15   -1.20    3.80
   3  -6 -15    2.60    4.20
   4  -6  15   35.20    4.90
  -4   6  15   39.60   11.70
   4  -6  15   32.00    6.20
   4  -6 -15   33.50    7.80
  -4  -6  15   41.70    8.10
   4   6  15   29.00    4.50
  -5   6  15   48.60   13.80
   5   6  15   46.50    5.30
   5  -6 -15   43.00    8.70
  -5  -6  15   51.99    9.80
  -6   6  15   29.00   13.40
   6  -6  15   26.40    5.50
   6   6  15   28.80    5.20
   6  -6 -15   35.70    8.60
   6  -6 -15   31.10    7.00
  -7   6  15   21.40   12.40
   7  -6  15   46.30    7.70
   7  -6 -15   45.00    8.20
   7   6  15   31.10    5.70
   7  -6 -15   39.80    9.10
   0  -7 -15   -2.30    3.00
   0  -7  15   -1.90    2.60
   0   7  15    5.00    5.30
  -1  -7 -15  222.38   13.70
  -1   7  15  210.28   19.00
   1  -7  15  223.38   14.40
   1  -7 -15  219.18   14.30
  -1  -7  15  219.68   14.70
   2  -7  15  144.29   11.10
  -2   7  15  135.39   16.20
   2   7  15  122.69   10.30
  -2  -7  15  151.78   12.10
   2  -7 -15  133.79   11.80
  -3   7  15  128.79   16.80
   3  -7  15  116.59   10.50
   3  -7  15  127.69    8.40
   3   7  15  122.99    8.10
   3  -7 -15  131.59   12.00
  -3  -7  15  132.49   11.60
   4  -7  15   28.10    6.40
   4  -7  15   20.60    4.40
  -4   7  15   25.40   11.00
   4   7  15   29.00    4.20
   4  -7 -15   13.40    5.10
  -4  -7  15   18.30    6.20
  -5   7  15  522.35   36.00
   5  -7  15  428.86   23.70
   5  -7  15  465.05   22.00
   5   7  15  429.66   20.60
   5  -7 -15  511.65   27.50
  -5  -7  15  432.76   26.00
   6  -7  15   73.69    8.10
  -6   7  15   77.89   18.10
   6  -7 -15   82.89   11.20
   7  -7  15   30.90    6.60
  -7   7  15   29.90   11.80
   7  -7 -15   36.70    8.30
   7  -7 -15   32.00    8.30
   0   8  15  485.05   30.20
   0  -8 -15  527.25   25.70
   0  -8  15  501.65   25.90
  -1   8  15    7.70    6.60
   1  -8  15    6.50    4.10
  -1  -8 -15   14.10    4.60
   1   8  15    1.50    4.80
  -1  -8  15   18.10    5.70
   1  -8 -15   10.60    5.30
   2  -8  15   57.69    8.00
  -2   8  15   58.09   12.80
   2   8  15   39.50    8.20
   2  -8 -15   66.79    8.40
  -2  -8  15   52.29    7.90
  -3   8  15   13.50    7.20
   3  -8  15    6.70    4.40
   3  -8 -15   17.30    6.40
  -3  -8  15   10.60    5.10
   3   8  15   11.20    4.00
   4  -8  15   16.00    5.70
  -4   8  15   12.80    9.00
   4  -8 -15   10.40    5.90
  -4  -8  15   13.30    5.80
   4   8  15   13.50    3.40
   5  -8  15   77.09    9.50
  -5   8  15   67.19   16.00
   5  -8  15  105.79    8.60
   5  -8 -15  125.79   13.50
  -6   8  15   21.30   12.40
   6  -8  15   15.00    4.50
   6  -8 -15   14.50    5.60
   6  -8 -15    5.70    6.50
   0  -9 -15    9.30    4.80
   0   9  15   -2.20    4.90
   0  -9  15    4.40    3.60
  -1   9  15    9.30    7.40
  -1  -9 -15   17.40    5.70
   1  -9  15   14.50    5.20
   1  -9 -15   22.10    5.90
   1   9  15   11.00    6.20
  -1  -9  15   13.10    5.40
  -2   9  15    7.10    7.40
   2  -9  15    1.80    4.70
   2   9  15   11.20    5.50
   2  -9 -15   10.90    5.40
  -2  -9  15    9.00    4.90
   3  -9  15   51.19    8.90
  -3   9  15   58.79   13.10
  -3  -9  15   59.29    8.80
   3  -9 -15   69.39   10.10
   4  -9  15   51.09    8.80
  -4   9  15   85.59   16.90
  -4  -9  15   50.99    9.70
   4  -9 -15   69.39   10.40
   5  -9  15   -1.40    3.90
  -5   9  15    1.20    8.60
   5  -9 -15   11.70    6.70
  -6   9  15   18.10   12.30
   6  -9 -15   15.20    7.50
   6  -9 -15   26.20    7.00
   0 -10 -15   43.30    8.20
   0  10  15   34.60    9.50
   0 -10  15   60.89    8.70
   1 -10  15   26.30    6.80
  -1 -10 -15   21.50    6.80
  -1  10  15   32.70   10.60
   1 -10 -15   27.10    7.10
  -1 -10  15   28.90    7.20
  -2  10  15  402.36   29.20
   2 -10  15  388.76   23.00
  -2 -10  15  356.56   22.40
   2 -10 -15  375.36   23.20
  -3  10  15   26.10   10.90
   3 -10  15   25.20    6.90
   3 -10 -15   40.10    9.20
  -3 -10  15   28.40    8.00
   4 -10  15   34.70    8.10
  -4  10  15   39.70   13.00
   4 -10 -15   21.80    8.20
  -5  10  15   18.10   10.40
   5 -10  15   23.70    7.30
   5 -10 -15   15.80    8.10
   0 -11  15    6.60    4.10
   0 -11 -15    7.80    5.30
   1 -11  15  142.69   13.10
   1 -11 -15  175.58   15.00
  -1 -11  15  138.19   13.40
   2 -11  15    3.20    4.90
  -2 -11  15    4.20    5.20
   2 -11 -15    3.50    6.30
  -3  11  15   55.09   14.40
   3 -11  15   26.90    7.80
   3 -11 -15   43.20    9.70
  -3 -11  15   32.40    8.20
  -4  11  15   77.59   16.60
   4 -11  15   69.49   10.30
   4 -11 -15  103.69   13.60
  -4 -11  15   87.99   11.30
   0 -12 -15   26.00    7.00
   0 -12  15   18.50    6.30
   1 -12  15   28.10    8.20
   1 -12 -15   25.70    7.90
  -1 -12  15   29.40    7.70
   2 -12  15    4.40    5.70
  -2 -12  15    8.10    5.50
   2 -12 -15   -1.00    5.40
   3 -12  15    1.50    5.50
   3 -12 -15    6.80    7.00
  -3 -12  15    9.20    5.70
   0 -13 -15   49.60   10.60
   1 -13  15  145.69   15.00
   1 -13 -15  121.69   14.10
  -1 -13  15  137.09   14.30
   0   0  16  274.17   15.70
   0   0  16  258.27   13.20
  -1   0  16  218.58   14.20
   1   0  16  211.48   10.40
   1   0  16  217.58   13.20
  -1   0  16  206.08   15.40
  -2   0  16   22.40    6.70
   2   0  16   18.90    3.30
   2   0  16   18.90    4.10
  -2   0  16   27.80    6.40
   3   0 -16  496.85   24.70
   3   0  16  496.35   21.90
  -3   0  16  554.34   30.90
  -3   0  16  492.75   26.80
   3   0  16  477.75   22.60
   4   0  16  308.37   15.30
   4   0 -16  299.17   18.00
  -4   0  16  259.97   19.50
  -4   0  16  317.67   23.10
   5   0 -16   31.20    6.70
   5   0  16   41.40    5.60
  -5   0  16   18.60    8.50
  -5   0  16   25.80    8.00
   6   0 -16  117.19   10.40
  -6   0  16  146.69   15.10
   6   0  16  135.69   10.20
  -6   0  16  126.09   16.90
   6   0 -16  150.48   12.40
  -7   0  16  218.58   21.90
   7   0  16  169.58   12.40
   7   0 -16  182.98   13.30
   8   0 -16   56.99    8.20
   8   0  16   59.49    8.10
  -8   0  16   36.30   12.60
   0   1  16   44.70    5.30
   0  -1  16   52.49    4.60
   0   1  16   48.90    6.70
   0  -1  16   42.20    6.30
   1  -1  16  513.25   22.90
  -1   1  16  459.55   26.30
  -1   1  16  499.25   24.80
   1  -1  16  484.25   20.10
   1   1  16  461.15   19.90
  -1  -1  16  500.15   24.60
   1   1  16  457.65   23.10
  -2   1  16  155.68   12.40
   2  -1  16  141.59    8.50
  -2   1  16  127.49   14.20
   2  -1  16  151.18   10.20
   2  -1 -16  157.78   10.80
   2   1  16  147.59    8.60
  -2  -1  16  161.28   12.50
   2   1  16  145.39   10.10
  -2  -1  16  148.49   14.00
   3  -1  16    4.80    3.00
  -3   1  16    8.60    6.70
   3  -1  16    6.30    2.40
  -3   1  16    3.00    4.50
  -3  -1  16    3.80    5.40
   3   1  16    6.10    2.30
   3   1  16    3.80    2.70
   3  -1 -16    7.40    3.70
  -3  -1  16   11.10    4.80
   4  -1  16    6.20    3.00
  -4   1  16   15.50    8.00
  -4   1  16   24.10    7.40
   4   1 -16   22.50    5.60
  -4  -1  16   11.50    6.30
   4   1  16    8.70    3.20
   4  -1 -16   15.50    5.30
  -4  -1  16   15.30    6.30
  -5   1  16   26.40    9.80
   5  -1  16   20.70    4.40
  -5   1  16   12.80    7.10
   5   1 -16   21.60    6.00
   5   1  16   19.60    4.30
   5  -1 -16   21.10    5.90
  -5  -1  16   23.90    7.80
  -5  -1  16   15.10    7.30
  -6   1  16   12.90    7.00
   6   1 -16   18.80    6.30
   6   1 -16   24.50    5.10
   6  -1  16   27.70    5.30
   6   1  16   13.10    4.20
   6  -1 -16   22.30    6.40
  -6  -1  16   14.10    6.90
  -6  -1  16   12.90    7.80
   7  -1  16   10.80    4.60
   7   1 -16   10.60    4.50
  -7   1  16   25.10   10.20
  -7  -1  16   27.90    9.70
   7  -1 -16   18.60    5.50
   7   1  16   13.60    4.90
   7  -1 -16   18.40    6.50
   8   1 -16   38.80    7.40
   8  -1  16   42.70    7.40
  -8   1  16   65.39   15.30
   8  -1 -16   55.09    9.10
  -8  -1  16   78.69   15.60
   8   1  16   57.09    8.60
   0  -2  16   64.29    4.80
   0  -2 -16   63.99    6.60
   0   2  16   59.69    7.40
   0  -2  16   48.50    6.50
   0   2  16   63.39    6.60
  -1  -2 -16  253.17   13.70
  -1   2  16  245.78   18.20
   1  -2  16  289.27   15.10
   1  -2  16  258.57   12.20
  -1   2  16  289.37   17.30
  -1  -2  16  237.28   16.20
   1   2  16  248.18   12.10
  -1  -2  16  270.27   15.60
   1  -2 -16  268.07   15.00
   1   2  16  263.57   15.40
  -2   2  16  314.87   22.10
   2  -2  16  302.67   14.50
   2  -2  16  297.67   16.00
  -2   2  16  302.47   19.20
  -2  -2 -16  301.17   15.20
   2  -2 -16  318.17   17.20
  -2  -2  16  304.17   20.40
  -2  -2  16  322.57   18.80
   2   2  16  327.97   14.70
   2   2  16  319.07   16.80
   3  -2  16  242.38   12.40
   3  -2  16  239.88   13.10
  -3   2  16  271.67   21.20
  -3   2  16  245.18   17.50
  -3  -2  16  215.18   15.90
   3  -2 -16  217.38   14.60
  -3  -2  16  221.18   17.40
   3   2  16  217.78   11.90
  -4   2  16  211.88   20.00
   4  -2  16  197.68   11.70
  -4   2  16  212.68   17.10
   4   2  16  197.08   11.70
   4  -2 -16  203.78   14.40
  -4  -2  16  225.28   16.70
  -4  -2  16  222.28   17.90
  -5   2  16  161.98   15.90
   5  -2  16  175.58   11.00
   5   2 -16  161.78   12.90
  -5   2  16  168.38   18.90
  -5  -2  16  173.38   16.50
  -5  -2  16  182.88   15.80
   5  -2 -16  181.78   13.80
   5   2  16  154.68   10.70
   6  -2  16  148.49   10.30
  -6   2  16  180.38   20.00
   6   2 -16  124.79    9.90
   6   2 -16  146.89   12.40
   6  -2 -16  142.09   12.90
  -6  -2  16  148.59   16.10
  -6  -2  16  139.29   15.00
   6   2  16  132.69   10.30
   7  -2  16   62.29    7.90
   7   2 -16   50.59    7.00
  -7   2  16   64.69   14.80
   7   2  16   74.69    8.10
   7  -2 -16   65.29    8.50
  -8   2  16   10.60    9.90
   8  -2  16   23.40    6.10
   8   2  16   10.80    4.80
   8  -2 -16   11.20    5.60
   0  -3  16  547.15   25.00
   0  -3  16  504.15   21.20
   0  -3 -16  508.25   23.90
   0   3  16  526.05   26.00
   1  -3  16  566.34   23.40
  -1   3  16  567.84   28.90
  -1  -3 -16  560.04   25.50
  -1   3  16  542.25   31.30
   1  -3  16  612.44   26.60
   1   3  16  580.04   27.40
  -1  -3  16  576.24   27.60
  -1  -3  16  569.24   28.30
   1  -3 -16  594.24   27.00
   1   3  16  600.74   24.30
  -2   3  16  604.44   33.40
   2  -3  16  530.75   23.00
  -2  -3 -16  547.05   24.00
   2  -3  16  561.64   25.20
  -2   3  16  598.64   29.50
  -2  -3  16  558.14   27.10
   2   3  16  507.95   25.20
   2  -3 -16  518.75   25.90
  -2  -3  16  532.15   28.80
   2   3  16  558.04   23.00
   3  -3  16  359.96   17.40
  -3   3  16  419.96   27.70
  -3   3  16  374.56   23.10
   3  -3  16  367.56   18.60
  -3  -3  16  345.67   21.40
   3   3  16  391.66   17.60
   3  -3 -16  356.96   20.30
  -3  -3  16  413.76   23.60
  -4   3  16   42.60   11.00
   4  -3  16   49.60    5.60
   4  -3  16   40.80    5.80
   4  -3 -16   47.10    8.10
  -4  -3  16   47.00    8.80
  -4  -3  16   35.10    8.80
   4   3  16   51.29    5.60
   5  -3  16  105.59    8.40
  -5   3  16  110.69   18.10
  -5  -3  16   80.89   11.70
   5   3  16  107.19    8.40
   5  -3 -16  112.49   11.30
   6   3 -16   97.09   10.70
  -6   3  16   74.59   16.00
  -6  -3  16   93.09   13.20
   6   3  16  112.39    9.00
   6  -3 -16  130.39   12.30
  -7   3  16   24.50   11.40
   7  -3  16    5.20    4.00
   7  -3 -16    4.20    4.90
   7   3  16    8.00    4.00
   7  -3 -16    5.30    4.40
   0  -4  16   71.89    7.60
   0   4  16   70.69    8.90
   0  -4 -16   52.19    6.40
   0  -4  16   72.19    4.80
   0   4  16   59.69    8.50
  -1   4  16   70.69   10.20
   1  -4  16   74.69    7.70
   1  -4  16   99.59    6.10
  -1  -4 -16   90.09    7.60
  -1   4  16   84.29    9.80
  -1  -4  16   95.79    8.90
   1   4  16  103.99    7.60
  -1  -4  16   87.79    9.20
   1  -4 -16   83.29    8.30
  -2  -4 -16  142.59    9.50
  -2   4  16  176.98   17.10
   2  -4  16  151.48    8.80
   2  -4  16  150.88   10.80
   2  -4 -16  169.48   12.20
  -2  -4  16  155.68   12.30
  -2  -4  16  156.78   13.00
   2   4  16  164.58    9.00
   3  -4  16  591.94   27.00
  -3   4  16  624.34   36.00
   3  -4  16  592.74   25.20
   3  -4 -16  588.94   28.70
  -3  -4  16  582.34   29.50
  -3  -4  16  538.75   29.70
   3   4  16  602.84   25.10
   4  -4  16  302.57   17.10
   4  -4  16  344.47   16.60
  -4   4  16  329.27   26.50
   4  -4 -16  337.47   20.00
  -4  -4  16  353.26   21.50
   4   4  16  321.37   16.30
   5  -4  16  148.19   10.30
  -5   4  16  162.58   18.50
  -5  -4  16  165.38   14.60
   5   4  16  141.79   10.00
   5  -4 -16  143.59   13.20
   6  -4  16   68.59    7.40
   6   4 -16   60.79    9.70
  -6   4  16   62.89   15.80
   6   4  16   51.59    6.60
   6  -4 -16   49.80    9.10
  -7   4  16   99.49   19.70
   7  -4  16   82.79    8.90
   7   4  16   76.09    8.30
   7  -4 -16   83.99   10.70
   7  -4 -16   87.59   10.20
   0  -5  16  807.42   35.00
   0   5  16  806.22   39.00
   0  -5  16  754.92   30.60
   0  -5 -16  812.02   34.50
  -1  -5 -16  369.66   18.80
  -1   5  16  389.26   25.40
   1  -5  16  399.16   20.10
   1  -5  16  366.76   16.20
   1  -5 -16  380.66   20.00
  -1  -5  16  389.76   20.10
   1   5  16  363.36   19.80
  -1  -5  16  362.66   20.80
  -2  -5 -16   31.20    5.20
  -2   5  16   43.60   10.80
   2  -5  16   35.20    4.30
   2  -5  16   41.00    6.10
   2   5  16   28.90    3.90
  -2  -5  16   46.20    7.70
   2  -5 -16   34.90    6.50
   3  -5  16  186.38   12.20
   3  -5  16  201.48   10.90
   3  -5 -16  158.98   13.20
  -3  -5  16  160.48   13.40
   3   5  16  188.38   10.30
   4  -5  16  132.89   10.10
   4  -5  16  126.39    9.00
  -4   5  16  168.18   18.10
  -4  -5  16  129.79   12.60
   4  -5 -16  147.39   13.00
   4   5  16  126.79    8.70
  -5   5  16   10.20    9.00
  -5  -5  16   16.80    6.20
   5  -5 -16   17.60    6.50
   5   5  16   12.60    3.60
   6  -5  16   78.39    8.00
  -6   5  16   89.89   18.00
   6  -5 -16   92.49   11.80
   6   5  16   75.39    7.50
  -7   5  16  135.49   20.80
   7  -5  16  132.79   11.00
   7   5  16  120.29   10.00
   7  -5 -16  116.29   12.80
   7  -5 -16  119.69   11.80
   0   6  16   -4.50    3.70
   0  -6 -16    2.30    3.20
  -1  -6 -16  231.48   13.50
   1  -6  16  197.98   10.20
   1  -6  16  210.68   13.90
   1  -6 -16  226.28   14.60
   1   6  16  213.78   15.40
  -1  -6  16  223.68   14.50
   2  -6  16  388.56   19.60
  -2  -6 -16  321.47   22.50
  -2   6  16  320.67   24.90
   2  -6  16  364.96   16.00
   2  -6 -16  324.47   19.40
  -2  -6  16  329.17   19.70
   3  -6  16   41.50    4.80
   3  -6  16   39.70    6.60
  -3   6  16   30.20   10.50
   3   6  16   43.40    4.70
   3  -6 -16   32.90    7.10
  -3  -6  16   31.50    7.20
  -4   6  16   92.99   17.00
   4  -6  16   97.29    7.60
   4  -6  16   78.49    8.30
   4   6  16   85.69    6.80
  -4  -6  16  102.69   11.10
   4  -6 -16   72.69    9.80
   5  -6  16  195.58   12.10
  -5   6  16  209.88   23.00
  -5  -6  16  198.28   16.40
   5   6  16  177.88   11.30
   5  -6 -16  191.88   15.90
  -6   6  16  148.29   21.10
   6  -6  16  159.38   11.40
   6   6  16  150.18   10.50
   6  -6 -16  160.38   14.70
   6  -6 -16  154.28   13.70
  -7   6  16   16.50   10.80
   7  -6  16   13.20    4.60
   7  -6 -16   13.80    5.80
   7   6  16   22.00    5.40
   0  -7 -16  117.49   10.00
   0   7  16   96.79   12.90
   0  -7  16  111.29   10.40
  -1   7  16   -0.50    4.60
   1  -7  16   -0.50    3.00
  -1  -7 -16    3.40    3.60
   1  -7 -16   -0.80    3.60
   1   7  16    1.80    4.40
  -1  -7  16    0.40    2.80
   2  -7  16   10.30    4.30
  -2   7  16   10.10    7.80
   2   7  16   14.00    4.60
   2  -7 -16   12.90    5.50
  -2  -7  16    3.80    4.10
   3  -7  16   61.99    6.10
   3  -7  16   56.49    7.70
  -3   7  16   74.59   15.10
   3   7  16   72.29    6.20
  -3  -7  16   63.19    9.90
   3  -7 -16   85.39   10.10
   4  -7  16   96.99    7.80
   4  -7  16  101.99    9.90
  -4   7  16   69.89   15.50
  -4  -7  16  105.59   11.30
   4   7  16   79.89    6.70
   4  -7 -16   78.09    9.70
   5  -7  16    3.70    3.30
  -5   7  16   17.60   10.10
   5  -7 -16    4.10    5.50
  -5  -7  16    4.40    5.80
   5   7  16    4.40    2.60
   6  -7  16  109.89    9.60
  -6   7  16  114.89   21.50
   6  -7 -16  125.49   13.60
   0  -8  16   -1.60    3.40
   0  -8 -16   -3.70    3.20
   0   8  16    1.30    5.10
   1  -8  16    8.00    4.30
  -1  -8 -16   11.50    4.50
  -1   8  16    1.40    5.50
   1  -8 -16   11.40    5.30
  -1  -8  16    8.90    5.00
   1   8  16    5.90    5.30
  -2   8  16   16.60    9.00
   2  -8  16   24.10    6.20
   2  -8 -16   41.30    7.60
   2   8  16   20.50    6.40
  -2  -8  16   30.00    6.50
   3  -8  16   70.99    8.70
  -3   8  16   70.19   14.50
   3  -8 -16   67.59    9.70
  -3  -8  16   68.99    9.30
   3   8  16   55.19    6.90
  -4   8  16   94.49   18.20
   4  -8  16   53.29    8.90
  -4  -8  16   83.19   10.50
   4  -8 -16   72.29   10.70
   4   8  16   70.19    6.40
  -5   8  16   31.70   12.30
   5  -8  16   33.70    7.60
   5  -8 -16   37.50    8.70
  -5  -8  16   14.40    8.90
   6  -8  16   54.69    7.00
  -6   8  16   43.80   15.20
   6  -8 -16   40.60    8.20
   6  -8 -16   36.60    9.20
   0   9  16  206.68   19.20
   0  -9 -16  239.18   15.90
   1  -9  16  190.28   13.70
  -1   9  16  141.89   17.10
  -1  -9 -16  185.48   13.00
   1   9  16  160.08   16.70
  -1  -9  16  162.88   13.80
   1  -9 -16  141.69   13.10
  -2   9  16   26.10    9.90
   2  -9  16   42.60    8.00
   2  -9 -16   41.20    8.30
   2   9  16   30.80    8.00
  -2  -9  16   25.40    6.70
  -3   9  16   80.79   15.90
   3  -9 -16   94.69   11.80
   4  -9  16  147.49   13.30
  -4   9  16  134.49   21.90
  -4  -9  16  143.69   13.80
   4  -9 -16  115.29   13.30
   5  -9  16    7.40    6.20
  -5   9  16    5.70   10.50
   5  -9 -16   21.00    7.60
   0 -10  16   16.40    6.20
   0 -10 -16   20.30    6.40
   0  10  16    6.40    7.20
  -1  10  16   70.19   13.70
   1 -10  16   55.79    9.60
  -1 -10 -16   46.60    8.10
  -1 -10  16   51.09    9.10
  -2  10  16   -0.70    7.30
   2 -10  16    3.80    4.90
  -2 -10  16    4.00    4.70
   2 -10 -16    9.00    6.00
   3 -10  16   36.80    8.40
  -3  10  16   22.20   10.80
   3 -10 -16   48.80   10.00
  -3 -10  16   41.20    8.30
  -4  10  16   72.49   16.00
   4 -10  16   70.99   10.20
  -4 -10  16   79.19   11.50
   4 -10 -16   47.00   10.40
  -5  10  16   26.60   12.10
   5 -10  16   35.50    8.50
   5 -10 -16   35.60    9.80
   0 -11  16   77.69   10.60
   0 -11 -16   76.79   11.80
   1 -11  16   85.49   11.20
  -1 -11  16   90.49   11.50
   1 -11 -16   89.39   11.50
   2 -11  16  171.28   14.70
  -2  11  16  136.59   26.40
   2 -11 -16  149.19   14.70
  -2 -11  16  114.39   12.80
   3 -11  16  102.99   12.30
  -3  11  16   59.29   15.20
   3 -11 -16   99.89   11.90
  -4  11  16   35.00   12.20
   4 -11  16   42.60    9.90
  -4 -11  16   45.20    9.50
   0 -12  16   38.70    8.80
   0 -12 -16   35.40    8.80
   1 -12  16   11.40    6.70
  -1 -12  16   26.60    8.00
   2 -12  16   83.69   11.80
  -2 -12  16  121.59   13.70
   2 -12 -16   90.99   12.70
   3 -12 -16  136.69   15.70
   0   0  17    1.20    2.00
   0   0  17    1.70    3.00
  -1   0  17   10.80    5.10
  -1   0  17   20.90    5.30
   1   0  17   22.10    5.30
   1   0  17   15.80    2.90
  -2   0  17   25.80    6.80
   2   0  17   12.50    2.70
  -2   0  17   19.00    7.30
   2   0  17   23.20    4.80
   3   0  17    2.40    2.30
   3   0  17   -0.50    2.60
  -3   0  17   -1.90    3.60
   3   0 -17   -1.60    3.10
  -3   0  17    6.50    6.00
  -4   0  17   10.80    6.10
   4   0 -17    2.10    3.70
   4   0  17    3.50    2.80
  -4   0  17    1.00    5.50
   5   0  17  218.98   13.00
   5   0 -17  200.58   15.10
  -5   0  17  250.97   21.40
  -5   0  17  209.88   18.50
  -6   0  17  117.09   16.00
  -6   0  17  107.99   14.20
   6   0  17   84.19    8.40
   6   0 -17   94.29   10.40
  -7   0  17    4.10    7.90
   7   0 -17   -4.90    4.00
   7   0 -17   -0.50    3.00
   7   0  17   -2.10    3.20
   8   0  17   84.09    9.70
   8   0 -17   96.39   10.40
  -8   0  17  127.99   18.90
   0   1  17  222.48   14.70
   0  -1  17  246.78   14.40
   0   1  17  227.78   13.20
   0  -1  17  211.38   11.60
   1  -1  17  177.58    9.40
   1  -1  17  198.98   12.80
  -1   1  17  184.88   13.50
  -1   1  17  185.78   15.20
   1   1  17  174.58   12.30
   1   1  17  194.68    9.70
  -1  -1  17  171.88   14.00
  -1  -1  17  182.28   13.40
   2  -1  17  797.02   34.60
  -2   1  17  741.23   41.10
  -2   1  17  879.81   39.10
   2  -1  17  830.72   32.90
   2  -1 -17  812.12   35.90
  -2  -1  17  803.92   37.70
  -2  -1  17  848.92   41.40
   2   1  17  819.22   32.80
   2   1  17  824.62   35.30
  -3   1  17  383.06   23.00
  -3   1  17  370.16   25.90
   3  -1  17  343.57   17.00
  -3  -1  17  354.76   21.90
   3  -1 -17  373.26   20.40
   3   1  17  351.26   18.30
   3   1  17  374.16   17.20
  -3  -1  17  375.06   24.70
   4  -1  17  243.48   13.30
  -4   1  17  243.78   21.40
   4   1 -17  251.67   16.20
  -4   1  17  247.08   18.90
   4   1  17  215.68   12.80
   4  -1 -17  238.58   15.60
  -4  -1  17  238.28   19.90
  -4  -1  17  237.68   18.00
  -5   1  17  157.88   18.00
   5  -1  17  153.08   10.50
   5   1 -17  168.48   13.30
  -5   1  17  144.99   15.20
  -5  -1  17  145.19   14.90
  -5  -1  17  131.69   16.00
   5  -1 -17  160.68   13.20
   5   1  17  148.09   10.10
   6   1 -17   87.69   10.10
  -6   1  17   90.49   14.20
   6   1 -17   87.19    8.70
  -6   1  17  104.19   15.50
   6  -1  17   97.69    8.90
  -6  -1  17  122.39   13.90
   6  -1 -17  100.89   11.10
  -6  -1  17   63.99   13.10
  -7   1  17   14.00    9.60
   7   1 -17   13.90    4.60
   7  -1  17    9.00    4.50
  -7  -1  17    9.00    8.50
   7  -1 -17    8.70    4.50
   7   1  17    7.70    4.40
   7  -1 -17   20.80    6.20
   8  -1  17    9.00    5.00
   8   1 -17    7.90    5.10
   8   1  17   11.50    5.20
   8  -1 -17    9.60    5.00
   0  -2  17    1.50    1.70
   0   2  17    1.40    3.50
   0  -2 -17    4.40    3.30
   0  -2  17    6.80    3.70
   0   2  17    4.30    3.40
   1  -2  17   84.19    5.70
  -1   2  17   90.99    9.80
  -1   2  17   65.19   10.20
  -1  -2 -17   75.59    7.10
   1  -2  17   81.69    8.00
  -1  -2  17   75.49    8.80
  -1  -2  17   90.99    9.60
   1  -2 -17   95.19    8.50
   1   2  17   84.79    8.40
   1   2  17   97.99    6.20
  -2   2  17  214.08   18.90
   2  -2  17  221.08   11.50
   2  -2  17  214.28   13.30
  -2   2  17  252.37   16.90
  -2  -2 -17  233.28   12.70
  -2  -2  17  225.68   15.80
   2   2  17  225.28   13.90
   2  -2 -17  237.68   14.40
  -2  -2  17  251.17   18.20
   3  -2  17  301.17   14.60
   3  -2  17  276.77   15.30
  -3   2  17  328.87   23.50
  -3   2  17  284.37   19.90
   3  -2 -17  267.57   17.00
  -3  -2  17  262.77   18.00
  -3  -2  17  284.77   20.60
   3   2  17  285.47   14.20
  -4   2  17  185.08   16.50
   4  -2  17  182.98   11.20
  -4   2  17  181.48   19.30
  -4  -2  17  159.38   16.10
   4   2  17  196.88   11.40
  -4  -2  17  154.38   14.80
   4  -2 -17  189.38   14.00
   5   2 -17  253.27   16.80
  -5   2  17  266.87   23.70
   5  -2  17  253.57   14.30
  -5  -2  17  231.28   19.80
   5   2  17  261.67   14.50
  -5  -2  17  243.58   19.10
   5  -2 -17  242.98   17.00
   6  -2  17   65.19    7.50
   6   2 -17   79.59    7.80
   6   2 -17   68.29    9.00
  -6   2  17   83.59   16.30
   6  -2 -17   63.89    9.60
  -6  -2  17   68.59   13.20
   6   2  17   81.09    7.90
  -6  -2  17   87.79   13.90
  -7   2  17  226.58   23.80
   7  -2  17  207.68   13.80
   7   2  17  190.18   13.30
   7  -2 -17  183.78   14.20
   7  -2 -17  170.88   15.10
   0   3  17    0.50    3.60
   0   3  17   -4.20    2.30
   0  -3  17   -3.50    2.50
   0  -3  17    0.50    1.50
   0  -3 -17   -1.10    2.70
  -1  -3 -17   58.79    6.20
  -1   3  17   33.90    8.50
   1  -3  17   52.29    4.50
   1  -3  17   53.59    6.60
  -1   3  17   47.30    8.40
  -1  -3  17   50.49    7.60
  -1  -3  17   42.10    6.30
   1   3  17   60.39    5.30
   1  -3 -17   57.59    7.10
   1   3  17   59.09    7.30
  -2   3  17   77.39   11.30
   2  -3  17   85.29    7.80
  -2  -3 -17   80.29    7.20
  -2   3  17  109.29   11.70
  -2  -3  17   89.09    9.20
   2   3  17   96.19    6.50
   2  -3 -17   92.49    9.10
  -3   3  17   56.09   12.10
  -3   3  17   38.50    8.70
   3  -3  17   48.30    6.50
   3  -3  17   61.79    5.70
  -3  -3  17   39.50    8.80
  -3  -3  17   44.30    8.30
   3  -3 -17   60.19    8.00
   3   3  17   51.29    5.20
  -4   3  17  101.19   13.00
   4  -3  17  123.09    9.40
   4  -3  17  123.09    8.80
  -4  -3  17  115.79   13.00
  -4  -3  17  117.39   12.10
   4   3  17  119.19    8.60
   4  -3 -17  100.69   10.90
  -5   3  17  244.28   23.60
   5  -3  17  236.88   14.00
  -5  -3  17  216.48   28.60
  -5  -3  17  260.97   19.60
   5  -3 -17  267.07   17.70
   5   3  17  242.48   14.00
   6   3 -17   57.89    9.40
  -6   3  17   65.69   15.50
   6  -3  17   64.09    7.30
  -6  -3  17   55.89   11.50
   6  -3 -17   64.79   10.50
   6   3  17   58.99    6.40
   7  -3  17  182.88   13.00
  -7   3  17  196.38   23.50
   7  -3 -17  184.08   14.40
   7  -3 -17  157.78   14.70
   0  -4  17  421.96   18.40
   0  -4 -17  448.96   21.50
   0   4  17  433.96   23.40
   0  -4  17  436.76   22.10
   0   4  17  409.16   24.20
  -1   4  17  483.05   25.00
   1  -4  17  435.86   18.40
  -1   4  17  392.96   26.20
  -1  -4 -17  410.26   20.60
   1  -4  17  461.75   22.20
  -1  -4  17  427.66   23.30
   1  -4 -17  414.46   21.80
   1   4  17  427.36   22.60
  -1  -4  17  439.96   22.80
  -2   4  17  421.86   24.50
  -2   4  17  431.56   28.40
   2  -4  17  440.36   21.30
  -2  -4 -17  413.26   19.70
   2  -4  17  446.26   18.90
  -2  -4  17  410.16   22.90
   2  -4 -17  393.26   21.80
  -2  -4  17  422.36   24.40
   2   4  17  402.96   18.40
  -3   4  17  163.28   17.00
   3  -4  17  148.79    9.60
   3  -4  17  179.38   11.70
   3  -4 -17  166.08   12.80
  -3  -4  17  147.79   18.70
  -3  -4  17  161.88   13.70
   3   4  17  160.08    9.60
   4  -4  17  261.77   15.30
  -4   4  17  246.58   23.50
   4  -4  17  278.97   14.70
  -4  -4  17  265.77   18.90
   4   4  17  283.97   14.50
   4  -4 -17  276.87   18.10
  -5   4  17  157.88   18.60
   5  -4  17  147.79   10.50
  -5  -4  17  162.48   14.90
   5  -4 -17  146.29   13.40
   6  -4  17  178.78   12.40
   6   4 -17  205.78   15.10
  -6   4  17  214.88   23.60
   6  -4 -17  168.88   15.00
   6   4  17  175.78   12.10
  -6  -4  17  186.58   17.60
  -7   4  17   -0.20    9.40
   7  -4  17    5.90    4.30
   7  -4 -17    6.00    5.10
   7  -4 -17   -0.70    3.70
   0  -5  17    5.80    2.10
   0   5  17    2.40    4.40
   0  -5  17    4.30    3.50
   0  -5 -17    8.80    3.70
  -1   5  17  417.26   27.40
  -1  -5 -17  427.46   21.00
   1  -5  17  419.76   18.10
   1  -5  17  436.26   22.10
   1   5  17  404.26   22.20
  -1  -5  17  462.15   23.00
   1  -5 -17  427.26   22.20
   2  -5  17   64.19    7.30
  -2  -5 -17   59.09    6.20
  -2   5  17   58.79   12.60
   2  -5  17   54.79    5.10
   2   5  17   55.59    5.10
  -2  -5  17   55.69    8.00
  -3   5  17   51.49   12.20
   3  -5  17   71.49    6.30
   3  -5  17   79.49    8.20
   3   5  17   87.19    6.50
  -3  -5  17   68.29    9.10
   3  -5 -17   61.99    8.10
   4  -5  17  120.79    8.70
  -4   5  17  116.89   15.90
   4  -5  17  109.99    9.60
   4   5  17  114.29    7.90
  -4  -5  17  115.99   12.20
   4  -5 -17   95.19   11.00
   5  -5  17   19.10    4.70
  -5   5  17   38.90   13.00
   5  -5 -17   18.30    6.80
  -5  -5  17   23.70    7.20
   5   5  17   26.50    4.90
   6  -5  17   34.00    6.20
   6   5  17   44.40    6.10
   6  -5 -17   22.90    7.30
  -7   5  17   48.40   15.40
   7  -5  17   34.80    6.60
   7   5  17   40.60    6.70
   7  -5 -17   32.50    8.60
   7  -5 -17   44.40    8.60
   0   6  17    3.00    4.90
   0  -6  17    4.80    3.80
   0  -6 -17   10.30    4.60
  -1   6  17   75.19   13.40
   1  -6  17   84.39    8.90
  -1  -6 -17   79.59    8.20
   1   6  17   70.59    8.90
  -1  -6  17   70.69    8.90
   1  -6 -17   86.19    9.00
  -2   6  17   28.90   10.00
   2  -6  17   29.20    6.10
   2  -6  17   37.70    4.50
  -2  -6  17   52.19    7.80
   2   6  17   34.00    4.80
   2  -6 -17   26.10    6.40
   3  -6  17  186.08   12.80
   3  -6  17  176.78   10.40
  -3   6  17  185.38   19.80
   3   6  17  180.88   10.20
  -3  -6  17  156.78   13.80
   3  -6 -17  155.28   13.50
   4  -6  17  131.99    9.20
  -4   6  17  124.39   17.90
   4  -6  17  130.99   11.10
   4   6  17  113.09    8.20
   4  -6 -17  128.49   12.50
  -4  -6  17  116.39   12.70
  -5   6  17   25.80   11.40
   5  -6  17   20.30    4.60
   5   6  17   21.60    4.50
   5  -6 -17   24.50    7.40
  -5  -6  17   22.20    7.30
  -6   6  17  145.69   20.90
   6  -6  17  109.89    9.60
   6   6  17  119.39    9.20
   6  -6 -17  110.19   12.80
   7  -6  17   98.39    9.60
  -7   6  17  105.99   21.30
   7   6  17   86.29    8.40
   7  -6 -17   73.29   10.20
   0  -7 -17  380.46   20.80
   0   7  17  373.76   25.80
   0  -7  17  386.06   21.60
  -1  -7 -17  435.46   21.40
   1  -7  17  374.26   21.50
  -1  -7  17  394.26   22.00
   1  -7 -17  410.36   22.50
  -2   7  17  250.37   23.20
   2  -7  17  303.87   18.20
  -2  -7  17  337.77   19.70
   2  -7 -17  323.37   19.70
   3  -7  17   11.60    3.80
  -3   7  17    6.20    8.40
   3  -7  17   10.70    4.70
   3  -7 -17    7.10    5.00
  -3  -7  17    0.90    4.10
  -4   7  17   72.39   15.80
   4  -7  17   65.89    6.70
   4  -7 -17   85.69   10.60
   4   7  17   60.39    5.90
  -4  -7  17   56.09    9.50
  -5   7  17  107.69   19.40
   5  -7  17   80.39    8.00
  -5  -7  17   89.19   11.80
   5   7  17   91.59    7.40
   5  -7 -17  116.59   12.80
   6  -7  17   51.79    7.00
  -6   7  17   21.10   12.70
   6  -7 -17   38.50    9.80
   6   7  17   42.20    6.20
   0   8  17   56.19   11.80
   0  -8 -17   39.80    7.40
   0  -8  17   59.79    8.40
  -1  -8 -17   53.69    7.10
   1  -8  17   60.29    8.20
  -1   8  17   54.39   11.90
   1   8  17   34.70    9.10
   1  -8 -17   60.79    8.50
  -1  -8  17   52.49    8.80
  -2   8  17    6.50    7.80
   2   8  17   -0.90    4.10
  -2  -8  17    3.80    4.40
  -3   8  17   69.19   14.60
   3  -8  17   55.19    8.10
   3   8  17   46.10    6.90
   3  -8 -17   55.69    9.90
   4  -8  17   -0.80    3.40
  -4   8  17   -4.70    7.80
  -4  -8  17    1.00    4.40
   4  -8 -17   -2.30    4.60
   4   8  17    1.80    2.40
   5  -8  17  149.29   16.10
  -5   8  17  137.29   22.80
  -5  -8  17  110.09   13.90
   5  -8 -17  148.39   14.60
  -6   8  17   20.30   12.60
   6  -8  17   22.10    6.40
   6  -8 -17   41.70   10.30
   6  -8 -17   31.90    7.60
   0  -9 -17   12.70    5.20
   0   9  17   20.50    8.00
   0  -9  17    9.20    5.30
  -1   9  17    2.90    6.40
  -1  -9 -17    2.00    4.40
   1  -9  17    6.70    4.80
   1  -9 -17    9.60    5.00
   1   9  17    5.80    5.50
  -1  -9  17    4.30    4.80
  -2   9  17    7.30    7.50
   2  -9  17   11.50    5.20
   2  -9 -17    7.80    5.40
  -2  -9  17   20.90    7.00
   2   9  17   11.80    6.30
  -3   9  17  149.79   19.20
   3  -9  17  133.69   13.00
   3  -9 -17  170.38   15.10
  -3  -9  17  166.88   14.30
  -4   9  17   51.29   14.10
   4  -9  17   67.59    9.40
  -4  -9  17   76.19   11.50
   4  -9 -17   70.59   12.00
  -5   9  17  126.09   21.80
   5  -9  17  100.39   11.40
   5  -9 -17  119.19   13.60
   0 -10  17    2.50    4.20
   0  10  17    3.20    6.00
   0 -10 -17    4.20    5.00
   1 -10  17  126.69   12.60
  -1  10  17  107.79   15.40
   1 -10 -17  123.99   12.70
  -1 -10  17  141.69   13.40
  -2  10  17   18.80    9.30
   2 -10  17   19.40    6.50
   2 -10 -17   19.00    6.70
  -2 -10  17   18.80    6.50
  -3  10  17   24.80   11.40
   3 -10  17   40.50    8.90
   3 -10 -17   21.50    7.90
  -3 -10  17   32.70    8.10
   4 -10  17   31.00    7.80
  -4  10  17   37.30   13.20
   4 -10 -17   38.20    9.90
  -4 -10  17   33.60    9.20
   0 -11  17   92.69   11.80
   0 -11 -17  135.49   13.20
  -1 -11  17   19.70    7.00
   1 -11 -17   27.50    7.60
  -2  11  17   61.49   14.10
   2 -11  17   54.59   10.30
  -2 -11  17   52.59   10.20
   2 -11 -17   76.49   12.20
   3 -11  17    9.60    6.00
  -3  11  17   22.00   10.40
   3 -11 -17    6.70    6.90
  -3 -11  17    1.40    4.60
   0 -12  17   16.40    7.30
   0 -12 -17   22.90    7.40
   1 -12  17   17.00    6.60
  -1 -12  17    5.30    6.40
   1 -12 -17   12.10    7.20
   2 -12  17   39.00    9.20
  -2 -12  17   50.19    9.50
   2 -12 -17   70.89   12.30
   0   0  18  151.08   10.00
   1   0  18   -2.50    2.60
  -1   0  18   -0.90    3.60
  -1   0  18    1.60    4.00
   1   0  18    2.40    1.80
   2   0  18  845.32   37.60
  -2   0  18  837.92   43.90
  -2   0  18  933.11   41.60
   2   0  18  897.51   35.20
  -3   0  18  421.36   27.60
  -3   0  18  397.26   24.10
   3   0  18  391.06   18.40
   3   0 -18  378.76   21.30
   3   0  18  380.76   19.60
   4   0 -18   46.40    8.40
  -4   0  18   78.99   12.10
   4   0  18   69.29    6.60
   5   0 -18   13.70    5.60
  -5   0  18    2.50    6.70
  -5   0  18   21.40    8.40
   5   0  18   15.90    4.00
  -6   0  18  266.47   24.00
  -6   0  18  267.97   21.40
   6   0  18  248.78   15.20
   6   0 -18  241.78   17.60
   7   0 -18   19.40    7.50
  -7   0  18   25.70   10.80
   7   0 -18   29.10    6.10
   7   0  18   28.70    6.00
   0  -1  18  101.39    7.50
   0   1  18  101.39   10.10
   0   1  18  107.19    8.70
   0  -1  18  111.49    9.90
  -1   1  18  165.88   14.80
   1  -1  18  193.58   10.00
  -1   1  18  224.78   15.00
   1  -1  18  205.98   13.40
   1   1  18  210.68   13.70
  -1  -1  18  206.18   14.20
   1   1  18  195.48   10.10
   1  -1 -18  183.88   12.70
  -1  -1  18  197.08   15.30
   2  -1  18  151.68    9.00
   2  -1  18  148.89   11.10
  -2   1  18  156.98   13.80
  -2   1  18  135.49   14.50
   2  -1 -18  169.68   12.10
  -2  -1  18  148.49   15.00
   2   1  18  147.89    8.90
  -2  -1  18  157.28   13.00
   2   1  18  175.38   11.70
   3  -1  18  359.46   17.50
   3  -1  18  343.87   18.70
  -3   1  18  400.16   23.80
  -3   1  18  365.06   26.30
   3  -1 -18  384.66   21.00
   3   1  18  343.77   22.00
   3   1  18  360.36   17.40
  -3  -1  18  383.56   25.70
  -3  -1  18  384.46   22.70
   4  -1  18   38.40    5.20
  -4   1  18   52.99   10.70
   4   1 -18   33.00    7.10
  -4   1  18   39.90   11.30
  -4  -1  18   56.29   10.50
   4  -1 -18   40.10    7.70
   4   1  18   33.50    4.60
  -4  -1  18   49.10   11.30
   5  -1  18   26.80    5.00
  -5   1  18   36.20   11.00
  -5   1  18   12.00    7.30
   5   1 -18   25.30    6.60
  -5  -1  18   45.20   11.50
   5   1  18   27.70    5.00
  -5  -1  18   20.80    7.70
   5  -1 -18   32.60    7.40
  -6   1  18   51.09   11.30
   6   1 -18   43.70    8.40
  -6   1  18   54.69   14.00
   6   1 -18   39.60    6.90
  -6  -1  18   56.99   13.20
  -6  -1  18   32.10    9.20
   6  -1 -18   52.69    9.30
  -7   1  18   84.19   17.20
   7  -1  18   80.59    9.00
   7   1 -18   80.49    8.80
  -7  -1  18  100.39   17.00
   7  -1 -18  104.09   12.20
   7   1  18   72.59    8.50
   0   2  18  408.36   22.50
   0  -2  18  407.76   18.60
   0  -2 -18  414.16   20.60
   0   2  18  378.16   21.50
   0  -2  18  429.36   21.40
   1  -2  18  148.59    8.20
  -1  -2 -18  142.49   10.00
  -1   2  18  173.28   13.50
   1  -2  18  150.38   11.10
  -1   2  18  125.09   13.70
   1  -2 -18  164.98   11.30
   1   2  18  134.29   11.50
   1   2  18  140.29    8.50
  -1  -2  18  122.29   12.00
  -1  -2  18  134.09   11.30
  -2   2  18   14.20    7.20
  -2  -2 -18   22.90    4.70
   2  -2  18   35.70    6.00
   2  -2  18   29.70    4.00
  -2   2  18   28.90    7.50
   2  -2 -18   24.10    5.50
  -2  -2  18   22.90    7.20
  -2  -2  18   39.00    7.60
   2   2  18   32.40    4.00
  -3   2  18  136.79   13.50
   3  -2  18  124.59    8.40
  -3   2  18  114.69   15.30
   3  -2  18  113.09    9.40
  -3  -2  18  122.59   12.10
   3   2  18  114.29    7.80
  -3  -2  18  107.89   13.90
   3  -2 -18  120.09   10.90
  -4   2  18   69.89   14.40
  -4   2  18   29.00    8.80
   4  -2  18   39.50    4.90
   4  -2 -18   47.20    8.10
   4   2  18   33.90    5.20
  -4  -2  18   36.30    8.70
  -4  -2  18   51.39   10.70
  -5   2  18  169.28   19.90
  -5   2  18  162.98   16.60
   5  -2  18  178.38   11.60
   5   2 -18  189.68   14.40
  -5  -2  18  156.18   15.90
   5  -2 -18  159.18   13.80
  -5  -2  18  181.28   17.70
   5   2  18  173.38   11.40
  -6   2  18   19.60    9.90
   6  -2  18   12.40    4.50
   6   2 -18    4.60    4.50
   6   2 -18    7.20    3.60
  -6  -2  18    9.70    8.00
  -6  -2  18    2.00    5.40
   6   2  18   15.80    4.60
   6  -2 -18    8.30    5.70
  -7   2  18  168.08   21.80
   7  -2  18  155.28   12.70
   7  -2 -18  188.08   16.10
   7   2  18  173.58   12.80
   7  -2 -18  204.68   14.80
   0  -3  18    3.10    1.90
   0   3  18   -1.30    3.50
   0   3  18    3.70    3.70
   0  -3  18   -2.10    2.90
   0  -3 -18   -1.70    2.50
  -1   3  18  575.44   33.50
  -1  -3 -18  626.44   27.60
  -1   3  18  636.24   31.50
   1  -3  18  591.54   24.90
   1   3  18  583.64   29.20
   1   3  18  658.13   26.70
  -1  -3  18  601.54   29.60
   1  -3 -18  632.64   29.00
  -2   3  18   29.50    9.60
   2  -3  18   26.70    3.90
   2  -3  18   27.20    5.30
  -2  -3 -18   32.80    5.40
  -2   3  18   21.60    7.10
   2   3  18   37.10    3.90
   2  -3 -18   27.30    6.10
  -2  -3  18   34.40    8.40
  -2  -3  18   22.10    6.60
   2   3  18   31.40    5.80
   3  -3  18  466.75   21.80
   3  -3  18  474.75   23.50
  -3   3  18  460.25   31.90
  -3   3  18  523.25   28.80
   3  -3 -18  529.05   26.10
  -3  -3  18  493.15   27.40
   3   3  18  525.45   22.20
  -3  -3  18  477.55   28.40
   4  -3  18   35.60    5.30
  -4   3  18   22.80    7.80
  -4   3  18   67.89   14.20
   4  -3 -18   37.50    7.60
  -4  -3  18   35.70    8.40
   4   3  18   36.10    5.00
  -4  -3  18   45.30    9.40
   5  -3  18   68.89    7.20
  -5   3  18   69.69   15.70
   5   3  18   67.19    7.10
  -5  -3  18   61.59   10.90
   5  -3 -18   65.49   10.30
   6  -3  18   36.80    6.50
   6   3 -18   54.19    9.50
  -6   3  18   68.29   15.70
  -6  -3  18   63.19   11.60
   6  -3 -18   61.29   10.20
   6   3  18   47.10    6.50
  -7   3  18   10.30   10.40
   7  -3  18   20.40    5.60
   7  -3 -18   16.60    6.80
   7   3  18   15.10    4.80
   7  -3 -18   18.30    6.10
   0   4  18   98.79   11.50
   0  -4  18  121.99    7.60
   0  -4 -18  109.89    9.30
   0   4  18  115.69   11.00
  -1   4  18  133.49   14.00
   1  -4  18  129.79   10.20
  -1  -4 -18  126.59    9.60
   1  -4  18  122.49    7.30
  -1   4  18  129.99   12.30
   1   4  18  135.29   10.00
   1  -4 -18  132.79   10.60
  -1  -4  18  119.09   10.50
   1   4  18  121.49   10.70
  -1  -4  18  116.19   11.10
  -2   4  18  144.79   13.90
   2  -4  18  164.78   11.60
  -2   4  18  180.18   17.80
  -2  -4 -18  139.49   10.10
   2  -4  18  150.48    9.00
   2  -4 -18  153.38   12.10
   2   4  18  148.49    8.90
  -2  -4  18  133.69   13.10
  -2  -4  18  150.38   12.60
  -3   4  18   51.49   12.80
   3  -4  18   52.89    5.50
   3  -4  18   41.10    6.30
   3   4  18   57.99    5.40
   3  -4 -18   43.70    8.00
  -3  -4  18   49.20    9.20
   4  -4  18   28.70    5.10
   4  -4  18   21.40    5.10
  -4   4  18   21.20    9.00
   4  -4 -18   31.30    7.50
  -4  -4  18   24.80    7.10
   4   4  18   17.30    4.00
   5  -4  18    5.80    3.60
  -5   4  18   15.80    8.40
   5   4  18    9.40    3.70
   5  -4 -18    3.40    5.10
  -5  -4  18    4.30    5.60
   6   4 -18   37.50    8.10
  -6   4  18   48.50   15.40
   6  -4  18   53.59    7.10
  -6  -4  18   66.49   12.30
   6   4  18   43.90    5.80
  -7   4  18   15.00   11.60
   7  -4  18   30.60    6.30
   7   4  18   28.40    6.00
   7  -4 -18   32.00    7.60
   0  -5  18  117.29   10.10
   0   5  18  104.59   12.40
   0  -5  18  102.49    7.10
   0  -5 -18  109.39    9.90
  -1   5  18  543.85   33.50
  -1  -5 -18  545.15   26.30
   1  -5  18  551.74   23.30
   1  -5  18  629.34   28.30
   1   5  18  589.14   28.80
  -1  -5  18  579.14   28.40
   1  -5 -18  597.84   28.20
  -2   5  18    6.00    6.40
   2  -5  18    1.80    2.00
   2  -5  18    4.00    3.80
   2   5  18    7.50    2.60
  -2  -5  18   10.10    4.50
   2  -5 -18    4.60    4.30
   3  -5  18   24.00    4.30
   3  -5  18   14.60    4.70
  -3   5  18   31.20    9.70
   3  -5 -18   11.30    5.40
  -3  -5  18   12.10    5.40
  -4   5  18   17.70    9.50
   4  -5  18   10.10    4.90
   4  -5  18   26.90    5.00
   4   5  18   16.20    3.90
  -4  -5  18   31.00    7.90
   4  -5 -18   33.90    7.40
  -5   5  18   18.10   10.10
   5  -5  18   37.40    5.90
   5   5  18   25.90    4.90
   5  -5 -18   28.70    8.00
  -5  -5  18   21.20    7.60
  -6   5  18   69.69   15.80
   6  -5  18   48.70    7.60
   6  -5 -18   62.99   11.00
   6   5  18   51.69    6.40
  -7   5  18    6.20   10.60
   7  -5  18   19.80    5.80
   7   5  18   28.30    5.80
   7  -5 -18   20.20    7.20
   7  -5 -18   26.70    7.30
   0  -6 -18  541.35   26.30
   0  -6  18  529.05   26.90
  -1  -6 -18    1.60    3.70
  -1   6  18    2.40    5.30
   1  -6  18    0.50    3.60
   1  -6 -18    5.30    3.50
   1   6  18   -2.00    4.00
  -1  -6  18    9.30    4.60
   2  -6  18   17.00    3.40
  -2   6  18   14.20    8.20
   2   6  18   26.80    5.30
   2  -6 -18   22.30    6.50
  -2  -6  18   27.50    6.80
   3  -6  18   28.00    6.20
  -3   6  18   37.70   11.00
  -3  -6  18   42.60    8.40
   3  -6 -18   27.20    7.10
   3   6  18   30.90    4.50
   4  -6  18  251.87   16.10
  -4   6  18  279.27   25.40
   4  -6  18  230.08   13.40
   4   6  18  213.48   12.50
  -4  -6  18  245.38   18.40
   5  -6  18  111.59    9.10
  -5   6  18  110.39   19.80
  -5  -6  18  106.29   12.90
   5  -6 -18   83.69   11.60
   5   6  18   99.29    8.10
   6  -6  18   42.40    7.00
  -6   6  18   38.50   14.40
   6  -6 -18   51.59   10.10
   6   6  18   36.30    6.00
   0   7  18   12.90    7.10
   0  -7  18   18.50    5.30
   0  -7 -18   19.10    5.50
  -1   7  18   15.90    7.60
  -1  -7 -18    9.40    4.50
   1  -7  18   15.20    5.20
   1  -7 -18    9.50    4.80
  -1  -7  18   14.80    5.10
   1   7  18    4.40    4.90
   2  -7  18    4.70    4.00
  -2   7  18    5.30    7.40
   2   7  18   -2.80    3.30
   2  -7 -18    2.00    4.20
  -2  -7  18    8.70    4.60
  -3   7  18   82.69   16.00
   3  -7  18  101.39    9.90
  -3  -7  18   90.79   10.80
   3  -7 -18   98.09   11.10
   3   7  18   72.09    7.20
   4  -7  18   83.79    7.50
   4  -7  18   79.39    9.20
  -4   7  18   92.99   18.40
  -4  -7  18   87.19   11.00
   4  -7 -18   75.29   10.70
   4   7  18   68.99    6.70
   5  -7  18   16.40    4.40
  -5   7  18   18.10   11.50
   5   7  18    9.40    3.40
  -5  -7  18    0.00    5.10
   5  -7 -18    3.30    5.50
  -6   7  18   -2.80    7.10
   6  -7  18   10.40    4.30
   6  -7 -18    5.10    6.40
   6   7  18    7.30    3.20
   0  -8  18   71.19    8.60
   0   8  18   68.09   13.20
   0  -8 -18   69.69    8.70
  -1   8  18   -1.40    6.30
   1  -8  18    0.00    4.00
  -1  -8 -18   -3.90    3.40
   1   8  18    3.50    5.80
   1  -8 -18   -1.30    4.30
  -1  -8  18    2.30    4.10
   2  -8  18  241.28   15.90
  -2   8  18  197.68   21.00
   2  -8 -18  230.28   16.40
  -2  -8  18  180.58   15.00
   2   8  18  180.88   16.10
  -3   8  18   -2.10    7.30
   3  -8  18    9.60    5.00
   3  -8 -18   24.70    7.50
   3   8  18   10.70    4.90
  -3  -8  18    3.90    5.10
  -4   8  18   38.80   13.00
   4  -8  18   13.80    5.30
   4   8  18   11.20    3.60
  -4  -8  18   12.60    6.60
   4  -8 -18    8.70    5.00
  -5   8  18   51.89   15.40
  -5  -8  18   59.69   11.40
   5  -8 -18   70.59   12.20
   6  -8 -18   41.50    8.60
   0  -9  18   41.60    8.70
   0  -9 -18   59.19    8.50
   0   9  18   55.89   12.00
  -1  -9 -18  187.88   14.30
  -1   9  18  147.19   18.90
   1  -9  18  161.98   14.10
  -1  -9  18  187.58   15.00
   1  -9 -18  180.68   14.60
   1   9  18  184.18   18.10
  -2   9  18   -3.50    7.10
   2  -9  18   -1.40    4.00
   2   9  18   -4.40    5.20
  -2  -9  18   -0.40    4.40
   2  -9 -18    1.30    4.20
   3  -9  18  137.49   13.00
  -3   9  18  119.39   17.30
  -3  -9  18  131.69   13.10
   3  -9 -18  130.59   13.60
   4  -9  18   38.90    7.90
  -4   9  18   34.10   12.40
   4  -9 -18   48.50   10.20
  -4  -9  18   41.60    9.40
  -5   9  18  107.09   20.60
   5  -9 -18   75.79   12.80
   0 -10 -18  146.79   13.20
   0 -10  18  125.59   13.10
   0  10  18  120.49   16.80
   1 -10  18   43.20    8.30
  -1  10  18   35.80   10.60
   1 -10 -18   42.90    8.90
  -1 -10  18   60.29   10.40
   2 -10  18    8.90    5.80
  -2  10  18   23.30   10.70
  -2 -10  18   13.10    6.40
   2 -10 -18   14.80    6.60
  -3  10  18  100.79   18.60
   3 -10  18   75.89   10.40
  -3 -10  18   70.89   10.50
   3 -10 -18   59.19   10.70
  -4  10  18   54.59   14.90
   4 -10  18   60.19   10.30
   4 -10 -18   58.99   11.80
  -4 -10  18   49.30   10.20
   0 -11 -18  -11.60    4.90
   0 -11  18    9.40    5.20
   1 -11  18   85.69   11.20
  -1 -11  18   90.59   11.90
  -2  11  18   16.90   11.20
   2 -11  18    8.60    6.20
  -2 -11  18   19.30    7.20
   2 -11 -18   10.40    6.90
   3 -11  18   20.20    7.50
  -3  11  18   51.49   15.20
   3 -11 -18   20.20    7.80
  -3 -11  18   27.30    8.30
   0 -12  18   30.00    8.60
   0 -12 -18   22.20    7.80
   1 -12 -18   25.20    8.00
  -1 -12  18   15.80    7.30
   0   0  19   -3.40    2.10
   0   0  19    0.40    3.20
  -1   0  19  152.28   14.20
   1   0  19  147.69   11.50
  -1   0  19  150.18   12.80
   1   0  19  147.39    8.50
   2   0  19   95.69    8.80
  -2   0  19   86.29   12.80
   2   0  19   99.79    7.00
  -2   0  19  108.99   11.70
  -3   0  19   40.80    8.60
  -3   0  19   24.30    9.20
   3   0  19   25.50    3.90
   3   0  19   23.40    5.30
   4   0 -19  137.39   12.40
   4   0  19  128.89    9.50
  -4   0  19  157.98   15.30
  -4   0  19  164.88   17.80
   5   0  19   23.80    4.70
   5   0 -19   33.00    7.30
  -5   0  19   31.10   10.60
  -5   0  19   49.40   10.70
  -6   0  19  463.65   29.90
  -6   0  19  489.45   33.40
   6   0 -19  420.36   25.30
   6   0  19  440.46   22.60
   7   0 -19   62.39    8.10
   7   0  19   45.60    7.70
  -7   0  19   75.99   15.80
   7   0 -19   55.09   10.30
   0   1  19   18.20    4.40
   0  -1  19   22.40    4.30
   0  -1  19   12.60    4.70
   0   1  19   21.90    6.20
   1  -1  19   73.59    8.10
  -1   1  19   68.59   10.40
  -1   1  19   67.79    9.10
   1  -1  19   71.99    5.50
  -1  -1  19   79.19    8.70
   1   1  19   69.79    5.60
   1  -1 -19   76.09    8.20
  -1  -1  19   73.89   10.00
   1   1  19   80.79    8.80
   2  -1  19  626.64   26.50
   2  -1  19  639.54   29.60
  -2   1  19  656.53   33.20
  -2   1  19  640.54   36.10
  -2  -1  19  613.24   34.90
   2  -1 -19  653.23   30.20
   2   1  19  643.84   26.50
  -2  -1  19  602.24   31.30
   2   1  19  627.94   29.80
   3  -1  19   47.60    6.70
  -3   1  19   30.60    8.30
   3  -1  19   49.80    5.00
   3  -1 -19   39.90    7.80
  -3  -1  19   45.60   10.90
  -3  -1  19   47.90    9.70
   3   1  19   45.10    5.10
  -4   1  19  413.56   28.80
   4   1 -19  320.57   20.40
  -4   1  19  371.26   24.60
   4  -1  19  328.37   17.30
  -4  -1  19  358.66   23.70
  -4  -1  19  368.26   26.80
   4  -1 -19  346.87   20.90
   4   1  19  352.06   17.50
  -5   1  19   61.79   13.90
  -5   1  19   40.00   10.70
   5   1 -19   48.60    8.90
   5  -1  19   57.09    6.80
  -5  -1  19   54.89   12.50
   5  -1 -19   68.09    9.50
  -5  -1  19   63.79   11.90
   5   1  19   61.49    6.80
  -6   1  19   95.09   14.10
  -6   1  19  128.19   17.90
   6  -1  19  127.49    9.90
   6   1 -19  122.29   12.20
   6  -1 -19  132.69   12.80
   6   1  19   95.79    9.30
  -6  -1  19  120.49   16.70
   7   1 -19   10.20    4.30
  -7   1  19   13.40   10.30
   7  -1  19    7.50    4.10
  -7  -1  19    6.30    8.00
   7   1  19    0.00    3.70
   7  -1 -19    3.50    5.20
   7  -1 -19   10.90    5.10
   0   2  19   21.10    5.30
   0   2  19   15.10    5.40
   0  -2 -19   15.80    4.50
   0  -2  19   16.90    5.40
   0  -2  19   23.40    4.10
   1  -2  19  526.65   26.10
   1  -2  19  542.85   22.60
  -1   2  19  509.25   30.40
  -1   2  19  517.65   28.40
  -1  -2 -19  562.84   25.30
  -1  -2  19  541.25   29.00
   1   2  19  562.24   27.30
   1   2  19  563.94   23.60
   1  -2 -19  545.75   26.40
  -1  -2  19  505.75   27.30
  -2   2  19   30.40    7.50
  -2   2  19   34.30    9.50
   2  -2  19   36.70    4.40
   2  -2  19   39.00    6.60
   2   2  19   28.20    6.30
  -2  -2  19   30.50    7.20
  -2  -2  19   28.00    8.60
   2  -2 -19   34.70    6.40
   2   2  19   29.00    4.00
   3  -2  19  412.76   19.10
  -3   2  19  414.96   25.50
  -3   2  19  412.16   28.90
   3  -2  19  398.56   20.70
  -3  -2  19  397.16   24.00
   3   2  19  399.66   18.80
   3  -2 -19  386.16   22.20
  -3  -2  19  397.56   26.50
  -4   2  19    2.60    5.50
   4  -2  19    2.70    2.80
  -4   2  19   12.90    7.40
   4  -2 -19   -0.80    2.80
  -4  -2  19    3.50    4.60
  -4  -2  19   -0.90    5.30
   4   2  19    2.70    2.50
  -5   2  19   49.80   10.90
   5   2 -19   60.59   10.10
  -5   2  19   59.09   14.60
   5  -2  19   70.29    7.30
  -5  -2  19   53.59   12.20
   5  -2 -19   49.50    9.10
  -5  -2  19   53.99   11.00
   5   2  19   59.59    7.00
   6   2 -19    7.10    4.20
   6  -2  19    6.60    3.90
   6   2 -19    6.00    5.00
  -6  -2  19    2.40    6.00
   6  -2 -19    3.10    4.90
  -6  -2  19   15.80    7.30
   7  -2  19   30.90    6.70
   7  -2 -19   43.40    7.90
   7   2  19   36.50    6.80
   7  -2 -19   35.30    8.50
   0  -3  19  365.06   20.60
   0  -3  19  372.16   17.50
   0  -3 -19  357.86   19.20
   0   3  19  343.27   21.10
   0   3  19  380.96   22.40
  -1   3  19   33.30    7.40
   1  -3  19   19.50    5.30
  -1   3  19   17.50    6.90
   1  -3  19   30.50    3.60
  -1  -3 -19   14.50    4.30
   1   3  19   21.80    4.30
   1  -3 -19   26.60    5.70
  -1  -3  19   29.40    7.10
  -1  -3  19   22.10    6.10
   1   3  19   27.30    6.10
  -2   3  19   10.00    5.80
  -2  -3 -19    9.40    3.80
   2  -3  19   10.60    4.20
   2  -3  19    9.80    2.80
   2  -3 -19   11.70    4.80
  -2  -3  19   11.90    5.30
   2   3  19    6.90    2.50
  -2  -3  19   12.90    6.40
   3  -3  19  169.88   12.00
   3  -3  19  171.18   10.40
  -3   3  19  198.28   16.60
  -3   3  19  138.59   17.50
  -3  -3  19  171.18   16.50
   3  -3 -19  182.38   13.70
  -3  -3  19  141.39   13.90
   3   3  19  158.58   10.00
  -4   3  19   73.19   15.90
   4  -3  19   66.59    6.60
  -4   3  19   76.79   12.70
  -4  -3  19   60.69   10.70
   4  -3 -19   58.29    8.90
   4   3  19   56.69    6.20
  -5   3  19  291.27   26.70
   5  -3  19  270.37   16.10
  -5  -3  19  324.77   22.50
   5  -3 -19  307.77   19.80
   5   3  19  310.57   16.50
   6  -3  19    2.70    3.60
   6   3 -19   -1.80    4.20
  -6   3  19   13.60   10.40
  -6  -3  19    7.60    6.70
   6   3  19    0.80    3.30
   6  -3 -19    1.00    4.40
  -7   3  19   73.39   17.20
   7  -3  19   86.49    9.60
   7   3  19   83.79    8.80
   7  -3 -19   88.99   10.60
   7  -3 -19   86.59   11.40
   0  -4  19  256.57   13.70
   0  -4  19  276.87   17.00
   0  -4 -19  290.17   16.20
   0   4  19  273.17   17.90
   0   4  19  229.78   18.40
  -1   4  19   41.40    9.30
  -1  -4 -19   19.70    4.80
   1  -4  19   18.00    3.10
   1  -4  19   29.20    6.00
  -1   4  19   33.80    7.70
   1   4  19   22.00    5.20
  -1  -4  19   19.40    6.10
   1   4  19   30.80    6.30
  -1  -4  19   27.70    7.00
   2  -4  19   25.30    5.50
   2  -4  19   27.00    3.90
  -2  -4 -19   22.30    5.10
  -2   4  19   26.60    7.40
  -2   4  19   24.40    8.30
   2  -4 -19   40.90    7.40
  -2  -4  19   19.20    7.00
  -2  -4  19   32.20    7.10
   3  -4  19    2.60    2.70
   3  -4  19    8.20    4.50
   3  -4 -19    4.00    4.40
   3   4  19    1.10    2.40
  -3  -4  19    2.10    4.40
  -4   4  19   19.90   10.30
   4  -4  19   23.60    4.70
   4  -4  19   21.60    5.60
   4  -4 -19   31.30    7.50
   4   4  19   27.00    4.80
  -4  -4  19   29.60    8.30
   5  -4  19  206.98   13.20
   5  -4 -19  198.08   16.40
  -5  -4  19  220.18   19.10
   5   4  19  211.68   12.80
   6   4 -19   40.40    8.70
   6  -4  19   18.00    4.70
  -6   4  19   27.20   11.90
  -6  -4  19   28.90    9.20
   6  -4 -19   37.90    9.00
   6   4  19   28.20    5.60
  -7   4  19   75.79   17.90
   7  -4  19   40.20    7.00
   7  -4 -19   48.40   10.10
   7  -4 -19   23.10    6.90
   7   4  19   31.20    6.40
   0  -5  19   64.49    6.10
   0  -5  19   73.49    8.70
   0   5  19   79.29   11.30
   0  -5 -19   63.89    7.90
   1  -5  19   21.10    3.10
   1  -5  19   29.30    6.30
  -1  -5 -19   22.00    5.30
  -1   5  19   21.60    8.50
  -1  -5  19   10.60    5.30
   1   5  19   14.90    5.70
   1  -5 -19   17.40    5.70
   2  -5  19  242.88   12.30
   2  -5  19  215.38   14.80
  -2   5  19  222.58   20.50
  -2  -5  19  244.38   17.20
   2  -5 -19  234.38   15.70
   2   5  19  245.18   13.40
   3  -5  19   91.29    9.50
   3  -5  19  106.59    7.90
  -3   5  19   90.19   16.90
  -3  -5  19   96.89   11.40
   3  -5 -19  109.09   11.10
   3   5  19  110.59    7.80
   4  -5  19   73.79    8.50
   4  -5  19   50.89    6.20
  -4   5  19   63.59   15.00
  -4  -5  19   47.90   10.00
   4   5  19   55.39    5.90
   4  -5 -19   50.09    9.30
  -5   5  19   12.30   10.50
   5  -5  19   30.00    5.80
   5   5  19   27.20    5.20
  -5  -5  19   23.30    7.60
   5  -5 -19   22.60    7.10
   6  -5  19   51.09    7.20
  -6   5  19   60.59   15.10
   6  -5 -19   42.50    9.50
   6   5  19   49.80    6.50
   0  -6 -19   -0.90    3.70
   0  -6  19    0.30    3.60
   0   6  19    2.30    5.30
  -1  -6 -19   25.80    5.70
  -1   6  19   31.60   10.10
   1  -6  19   41.90    7.30
  -1  -6  19   35.30    7.40
   1   6  19   19.70    6.10
   1  -6 -19   30.80    6.80
  -2   6  19   79.79   15.40
   2  -6  19   93.29    6.80
   2  -6  19  105.19   10.10
   2  -6 -19   81.99   10.00
  -2  -6  19  109.39   11.30
   2   6  19  105.49    9.40
   3  -6  19   95.79    7.40
   3  -6  19   85.59    9.20
   3   6  19   73.39    6.80
  -3  -6  19  110.79   11.70
   4  -6  19   21.60    5.90
  -4   6  19   23.90    9.30
   4  -6  19   13.70    4.10
   4   6  19   14.10    3.40
  -4  -6  19   24.80    7.60
   4  -6 -19   18.80    6.40
  -5   6  19    5.20    9.50
   5  -6  19    4.50    3.50
   5   6  19    3.00    2.90
   5  -6 -19    6.40    5.90
  -5  -6  19    3.70    5.90
   6  -6  19   80.59    8.60
  -6   6  19   40.60   14.80
   6   6  19   54.19    6.60
   6  -6 -19   77.59   11.40
   0  -7  19  226.08   16.00
   0  -7 -19  231.08   15.60
   0   7  19  245.38   20.90
  -1  -7 -19   69.09    8.00
   1  -7  19   73.99    8.40
  -1   7  19   65.49   13.10
   1  -7 -19   55.59    8.90
   1   7  19   46.80    9.90
  -1  -7  19   56.99    7.80
  -2   7  19   30.60   11.20
   2  -7  19   18.80    5.90
  -2  -7  19   22.10    6.60
   2   7  19   21.00    6.40
   2  -7 -19   19.40    6.50
  -3   7  19   39.30   12.40
   3  -7  19   44.50    7.90
  -3  -7  19   45.80    9.50
   3  -7 -19   59.69   10.10
   4  -7  19  214.88   15.80
  -4   7  19  273.57   26.10
   4   7  19  198.58   12.10
   4  -7 -19  223.08   17.40
  -4  -7  19  201.58   17.50
  -5   7  19   50.69   15.70
   5  -7  19   22.20    4.90
  -5  -7  19   20.40    7.50
   5   7  19   18.80    4.40
   5  -7 -19    7.20    5.80
  -6   7  19   94.99   20.10
   6  -7  19   93.09    9.60
   6   7  19   72.49    7.30
   6  -7 -19  107.39   13.30
   0  -8 -19   18.60    6.10
   0  -8  19   20.10    6.40
   1  -8  19  274.47   18.40
  -1   8  19  278.67   23.80
  -1  -8  19  258.07   18.40
   1  -8 -19  293.77   18.50
   2  -8  19   28.10    7.00
  -2   8  19   20.80    9.70
   2   8  19   21.80    7.20
   2  -8 -19   18.70    6.70
  -2  -8  19   26.30    7.60
  -3   8  19   25.10   10.70
   3  -8  19   27.70    6.70
   3  -8 -19   22.90    7.00
  -3  -8  19   29.50    8.00
   3   8  19   14.00    5.10
   4  -8  19  162.18   13.80
  -4  -8  19  176.18   15.60
   4   8  19  163.18   11.50
   4  -8 -19  173.08   15.80
  -5   8  19  141.59   20.80
   5  -8 -19  118.69   13.80
  -5  -8  19  102.49   13.30
   0   9  19    4.20    6.70
   0  -9  19   -4.80    4.10
   0  -9 -19    5.30    4.30
  -1   9  19   30.80   10.10
   1  -9  19   40.90    8.20
   1   9  19   31.10   10.20
  -1  -9  19   40.00    8.40
   1  -9 -19   39.20    8.70
  -2   9  19   40.70   12.80
   2  -9  19   46.90    9.10
  -2  -9  19   42.10    8.80
   2  -9 -19   56.69   10.00
   3  -9  19   36.50    7.80
  -3   9  19   15.80    9.90
   3  -9 -19   45.90    9.80
  -3  -9  19   23.80    7.60
  -4   9  19   34.70   13.10
   4  -9  19   23.00    7.00
  -4  -9  19   34.60    8.90
   4  -9 -19   36.50    9.20
  -5   9  19   93.39   20.50
   5  -9 -19   69.29   13.10
   0  10  19    6.30    7.40
   0 -10  19   16.60    7.00
   0 -10 -19   14.80    6.40
  -1  10  19  231.08   22.40
   1 -10 -19  226.88   17.10
  -1 -10  19  204.18   16.90
   2 -10  19   44.50    8.80
  -2  10  19   45.50   12.80
  -2 -10  19   38.60    9.20
   2 -10 -19   31.10    7.90
   3 -10  19  231.28   18.10
  -3  10  19  290.37   26.50
  -3 -10  19  224.38   18.60
   3 -10 -19  285.47   20.30
  -4  10  19   15.10   10.70
   4 -10  19   27.90    7.40
  -4 -10  19   24.30    8.20
   4 -10 -19   24.80    7.70
   0 -11  19   -4.00    4.80
   0 -11 -19   -1.80    5.20
   1 -11  19   14.90    6.90
   1 -11 -19    6.30    5.80
  -1 -11  19    9.70    6.30
   2 -11  19    6.50    5.80
  -2  11  19   21.10   10.10
  -2 -11  19    2.10    6.10
  -3  11  19   15.90   11.00
   3 -11  19   19.50    6.90
  -3 -11  19   22.00    7.50
   3 -11 -19   19.60    7.40
   0 -12  19   28.90    8.70
   0 -12 -19   15.20    9.90
   0   0  20  312.07   18.50
   0   0  20  272.17   16.50
   1   0  20   49.50    4.70
  -1   0  20   39.30    8.80
  -1   0  20   39.40    7.80
   1   0  20   37.30    6.90
   2   0  20   44.50    4.70
  -2   0  20   38.10   10.00
  -2   0  20   42.50    8.80
   2   0  20   38.70    7.00
   3   0  20    4.70    2.30
   3   0 -20   -2.60    3.40
  -3   0  20    5.00    6.90
   3   0  20    4.50    3.50
  -3   0  20   -3.70    4.70
   4   0  20  220.98   13.00
  -4   0  20  240.98   21.80
   4   0 -20  217.78   15.70
  -4   0  20  198.48   18.10
   5   0 -20   69.69    9.60
  -5   0  20   69.59   15.00
   5   0  20   49.50    6.60
  -5   0  20   63.49   12.60
  -6   0  20   -0.80    7.90
   6   0 -20    3.10    4.60
   6   0  20    4.30    3.70
  -6   0  20   -3.80    6.40
   7   0  20   51.69    7.70
   7   0 -20   55.19    8.00
   7   0 -20   48.30    9.60
  -7   0  20   65.19   16.00
   0  -1  20    9.10    4.50
   0  -1  20    5.50    3.00
   0   1  20    2.80    2.90
   0   1  20   -1.60    3.00
   1  -1  20   37.40    4.20
  -1   1  20   37.40    7.90
   1  -1  20   52.89    7.50
  -1   1  20   65.09   11.30
  -1  -1  20   37.00    8.60
   1   1  20   43.00    4.70
  -1  -1  20   54.69    8.30
   1  -1 -20   36.50    6.70
   1   1  20   44.80    7.80
  -2   1  20   15.30    6.80
   2  -1  20   20.90    3.70
   2  -1  20   15.50    4.50
  -2   1  20    6.90    5.70
  -2  -1  20    6.60    6.10
  -2  -1  20    9.20    4.50
   2   1  20   15.70    3.30
   2  -1 -20   19.70    5.40
   2   1  20    9.90    4.60
  -3   1  20  202.28   20.50
   3  -1  20  221.08   12.40
  -3   1  20  227.98   18.30
   3  -1  20  215.48   14.20
  -3  -1  20  205.68   17.30
   3   1  20  219.48   12.10
   3  -1 -20  221.88   15.80
  -3  -1  20  241.48   20.80
   4  -1  20   32.80    4.60
   4   1 -20   27.10    7.10
  -4   1  20   26.70   10.50
   4   1  20   20.10    4.10
  -4  -1  20   36.90    9.20
   4  -1 -20   36.00    7.80
  -4  -1  20   22.70    8.40
   5  -1  20   29.20    5.60
   5   1 -20   35.80    7.80
  -5   1  20   21.20    9.40
  -5   1  20   28.00   11.00
   5   1  20   22.10    5.00
  -5  -1  20   34.40   10.10
  -5  -1  20   29.60    9.00
   5  -1 -20   21.80    6.80
   6  -1  20  160.88   11.80
  -6   1  20  122.69   15.90
  -6   1  20  141.89   19.60
   6   1 -20  135.79   13.50
  -6  -1  20  179.98   19.90
  -6  -1  20  157.98   17.30
   6   1  20  134.39   10.80
   6  -1 -20  181.58   15.10
   7   1 -20    6.60    8.10
   7  -1  20   30.50    6.60
  -7   1  20   43.10   13.80
   7   1  20   19.00    5.60
  -7  -1  20   15.70    9.50
   7  -1 -20   23.50    7.80
   0  -2  20    2.00    4.00
   0   2  20    1.40    3.90
   0  -2 -20    9.10    4.60
   0   2  20    4.90    4.00
   0  -2  20    6.90    3.20
  -1  -2 -20    2.40    3.30
   1  -2  20    8.50    2.50
  -1   2  20   11.20    5.50
  -1   2  20    4.90    5.50
   1  -2 -20   13.90    4.90
   1   2  20    6.20    4.30
   1   2  20    6.50    2.40
  -1  -2  20    8.00    4.70
  -1  -2  20    8.20    4.80
  -2  -2 -20  136.39    9.90
   2  -2  20  120.39    8.30
  -2   2  20  130.69   12.90
  -2   2  20  146.29   15.60
   2  -2  20  141.39   11.30
   2   2  20  126.19    8.10
  -2  -2  20  141.39   15.10
  -2  -2  20  134.29   12.80
   2  -2 -20  132.79   11.50
   2   2  20  142.79   11.40
   3  -2  20   11.00    3.50
  -3   2  20    6.10    7.90
   3  -2  20    4.50    3.30
  -3   2  20    8.10    6.00
   3   2  20    6.20    2.90
   3  -2 -20   12.30    5.30
  -3  -2  20    9.00    6.20
  -3  -2  20    1.90    4.80
  -4   2  20   29.30   11.40
  -4   2  20   58.29   11.80
   4  -2 -20   54.19    9.20
   4   2  20   36.70    5.30
  -4  -2  20   41.20   10.90
  -5   2  20  104.09   13.80
   5   2 -20   66.89    9.50
  -5   2  20   88.49   16.30
   5  -2  20   78.59    7.90
  -5  -2  20   97.29   13.10
   5   2  20   82.69    7.90
   5  -2 -20   57.69   10.30
  -5  -2  20   77.49   14.30
   6   2 -20   37.60    8.50
   6  -2  20   47.70    7.00
  -6   2  20   38.40   12.90
  -6  -2  20   41.10   10.90
   6  -2 -20   48.60    9.70
   6   2  20   47.70    6.20
  -7   2  20   31.20   12.30
   7  -2  20   27.70    6.30
   7  -2 -20   27.50    7.00
   7  -2 -20   20.80    7.70
   7   2  20   24.90    6.10
   0   3  20  648.54   32.20
   0  -3 -20  580.84   29.00
   0  -3  20  672.63   28.30
  -1  -3 -20  471.15   23.80
   1  -3  20  520.65   25.90
   1  -3  20  498.15   21.20
  -1   3  20  518.05   28.00
  -1   3  20  460.15   29.70
  -1  -3  20  536.55   27.40
   1  -3 -20  495.05   25.30
   1   3  20  519.25   26.50
  -1  -3  20  455.05   27.10
   1   3  20  529.05   24.10
  -2   3  20   57.49   10.10
  -2  -3 -20   37.60    6.20
   2  -3  20   37.90    4.50
  -2   3  20   34.40   10.60
   2  -3  20   37.60    6.80
   2   3  20   31.40    4.20
   2   3  20   35.90    7.20
   2  -3 -20   44.30    6.70
  -2  -3  20   29.00    8.20
  -2  -3  20   27.70    6.90
  -3   3  20  427.46   27.30
   3  -3  20  457.05   23.20
   3  -3  20  425.16   20.70
  -3   3  20  521.05   33.40
   3  -3 -20  444.86   24.70
  -3  -3  20  443.26   28.20
  -3  -3  20  489.85   26.90
   3   3  20  451.15   20.70
   4  -3  20   47.50    5.90
  -4   3  20   29.50    9.40
  -4   3  20   44.80   12.10
  -4  -3  20   27.40    8.90
   4  -3 -20   35.40    7.80
   4   3  20   41.30    5.50
   5  -3  20    3.40    3.40
  -5   3  20    9.10    8.30
   5  -3 -20    3.80    5.40
   5   3  20    5.30    3.60
  -5  -3  20   -4.00    4.90
  -6   3  20   31.30   12.60
   6   3 -20    6.30    5.50
   6  -3  20   18.90    5.50
   6   3  20   13.40    4.60
  -6  -3  20    2.40    5.80
   6  -3 -20    5.90    6.50
   7  -3  20   66.39    8.70
  -7   3  20   79.79   18.60
   7  -3 -20   56.49   11.10
   7   3  20   67.39    8.20
   0  -4 -20   11.30    4.50
   0   4  20   21.90    6.30
   0  -4  20   17.80    4.00
   0  -4  20   17.00    5.70
   0   4  20    8.00    5.40
  -1  -4 -20   -1.70    3.10
   1  -4  20   -0.90    1.30
   1  -4  20    0.00    3.30
  -1   4  20   -6.00    3.30
  -1   4  20    0.10    3.50
   1  -4 -20    0.10    3.60
   1   4  20   -0.10    4.00
  -1  -4  20   -2.80    3.50
  -1  -4  20   -3.30    3.70
   1   4  20    3.80    3.90
   2  -4  20  116.59    7.60
  -2   4  20  105.09   12.50
  -2   4  20   89.19   13.20
   2  -4  20  101.29    9.90
   2  -4 -20  103.79   10.50
   2   4  20  106.09    7.90
  -2  -4  20  114.19   15.00
  -2  -4  20  107.39   11.70
  -3   4  20  124.19   17.20
   3  -4  20  103.49    9.60
   3  -4  20   96.19    7.70
   3   4  20   99.69    7.60
  -3  -4  20   91.29   11.80
   3  -4 -20  118.19   10.90
   4  -4  20  247.08   14.00
   4   4  20  235.68   13.40
  -4  -4  20  220.08   18.40
   4  -4 -20  244.68   17.70
  -5   4  20    7.90    9.20
   5  -4  20    7.40    3.80
   5   4  20   10.60    3.40
  -5  -4  20   22.20    8.40
   5  -4 -20   13.80    6.40
   6  -4  20   20.50    5.40
  -6   4  20   14.10    9.60
   6   4 -20    9.80    6.00
   6   4  20   12.90    4.50
   6  -4 -20    6.30    5.90
  -6  -4  20    9.00    7.50
   7   4  20   76.49    8.40
   0  -5  20  169.88   13.70
   0  -5  20  194.28   13.10
   0  -5 -20  213.98   14.00
  -1   5  20  271.47   23.10
  -1  -5 -20  336.27   17.90
   1  -5  20  317.07   18.70
   1  -5  20  304.87   14.20
  -1  -5  20  321.37   19.90
   1   5  20  305.07   19.90
   1  -5 -20  297.97   18.40
   2  -5  20   19.90    5.80
  -2   5  20   19.10    9.30
   2  -5  20   19.10    3.70
   2   5  20   18.00    4.50
   3  -5  20   11.60    4.80
   3  -5  20    9.60    3.10
  -3   5  20   11.90    8.00
  -3  -5  20   12.40    5.90
   3  -5 -20    0.70    4.30
   3   5  20    8.30    3.10
   4  -5  20   -1.50    2.50
   4  -5  20   -0.90    3.30
   4  -5 -20    4.20    5.30
  -4  -5  20   -2.90    4.60
  -5   5  20  280.87   27.60
   5  -5  20  240.98   14.60
  -5  -5  20  250.27   19.60
   5  -5 -20  232.58   18.30
   5   5  20  223.08   13.60
   6  -5  20   67.79    8.10
  -6   5  20   42.60   15.10
   6   5  20   60.99    7.10
  -6  -5  20   53.59   13.20
   6  -5 -20   74.19   12.20
   0  -6 -20  379.36   21.40
   0   6  20  362.76   26.30
   0  -6  20  412.46   22.60
  -1  -6 -20    9.90    4.50
   1  -6  20    3.10    4.40
  -1   6  20    2.00    4.90
   1   6  20   14.90    6.40
  -1  -6  20    5.40    5.10
   1  -6 -20    7.10    4.60
   2  -6  20  267.57   13.60
   2  -6  20  241.88   16.80
  -2   6  20  278.77   23.70
  -2  -6  20  313.87   19.50
   2  -6 -20  291.77   18.60
  -3   6  20   52.29   14.00
   3  -6  20   42.40    5.30
   3  -6  20   42.90    7.50
  -3  -6  20   41.20    8.70
   3  -6 -20   34.10    7.90
   3   6  20   33.50    5.00
   4  -6  20   41.80    7.80
  -4   6  20   28.10   12.80
   4  -6  20   28.30    5.30
  -4  -6  20   28.70    8.20
   4   6  20   27.90    4.80
   4  -6 -20   26.50    7.80
   5  -6  20   24.90    5.40
  -5   6  20   45.10   14.50
  -5  -6  20   12.80    6.70
   5   6  20    8.00    3.10
   5  -6 -20   15.10    7.00
  -6   6  20  117.09   22.20
   6  -6  20  160.98   11.80
   6   6  20  113.59    9.60
   6  -6 -20  156.28   15.30
   0   7  20  105.09   14.50
   0  -7 -20  122.29   11.10
   0  -7  20   99.89   10.90
   1  -7  20   17.20    5.80
  -1  -7 -20   17.40    5.60
  -1   7  20   13.80    7.80
   1  -7 -20   16.20    5.50
   1   7  20   15.50    6.70
  -1  -7  20    8.00    5.00
   2  -7  20    6.60    4.80
  -2   7  20   20.10   10.30
   2  -7 -20    6.50    5.30
  -2  -7  20   24.90    7.30
   2   7  20   13.70    6.00
   3  -7  20   24.70    6.60
  -3   7  20   35.70   12.00
   3   7  20   31.90    5.90
  -3  -7  20   16.90    7.00
   3  -7 -20   14.90    6.80
  -4   7  20  122.89   21.90
   4  -7  20   95.19   10.80
   4  -7 -20  116.79   13.10
   4   7  20  102.39    8.20
  -4  -7  20  102.59   13.20
   5  -7  20    4.70    3.70
  -5   7  20   17.10   10.10
  -5  -7  20   16.00    7.50
   5   7  20    4.10    2.70
   5  -7 -20   -3.60    5.10
   0   8  20   32.90   10.20
   0  -8 -20   18.60    5.60
  -1   8  20   50.29   12.70
  -1  -8 -20   65.39    8.90
   1  -8  20   43.40    8.60
   1  -8 -20   49.80    8.70
   1   8  20   50.99   11.40
  -1  -8  20   45.50    8.80
   2  -8  20   56.39    9.50
  -2   8  20   35.40   11.40
   2   8  20   27.20    8.30
  -2  -8  20   46.80    9.30
   2  -8 -20   47.60    8.90
   3  -8  20   64.49   10.40
  -3   8  20   61.99   15.40
   3   8  20   63.39   10.20
  -3  -8  20   83.89   11.40
  -4   8  20  120.09   17.70
   4  -8  20   89.79   10.80
   4  -8 -20   98.19   12.50
   4   8  20   71.99    8.30
  -4  -8  20  109.69   12.80
  -5   8  20    0.90    8.90
  -5  -8  20   11.40    6.50
   5  -8 -20   16.20    7.40
   0  -9  20  110.79   11.90
   0  -9 -20   91.19   10.90
   0   9  20   80.19   14.90
   1  -9  20  151.88   14.10
  -1   9  20  128.99   17.60
   1  -9 -20  145.39   13.50
   1   9  20  148.39   17.10
  -1  -9  20  138.69   13.90
   2  -9  20   49.70    9.60
  -2   9  20   56.69   14.10
   2   9  20   32.40    9.90
   2  -9 -20   42.80    9.00
  -2  -9  20   68.29   11.40
  -3   9  20   41.80   13.30
   3  -9  20   29.40    7.70
   3  -9 -20   30.70    7.80
  -3  -9  20   22.80    7.90
   3   9  20   34.30   11.80
  -4   9  20   63.29   16.10
   4  -9  20   59.69    9.90
   4  -9 -20   49.99   10.40
  -4  -9  20   69.79   12.40
   0 -10 -20   28.20    7.40
   0  10  20   12.50    8.10
   0 -10  20   21.80    7.20
  -1  10  20   -1.70    7.00
   1 -10  20    5.40    5.80
   1  10  20    4.60    9.20
  -1 -10  20    5.10    4.70
  -2  10  20   40.00   12.20
   2 -10  20   29.60    8.00
   2 -10 -20   29.50    7.90
  -2 -10  20   34.80    8.90
   3 -10  20   31.50    8.00
  -3  10  20   36.90   12.20
   3 -10 -20   26.70    8.20
  -3 -10  20   20.60    8.70
   0 -11 -20   19.30    6.30
   0 -11  20    7.40    6.10
   1 -11  20   60.79   11.10
  -1 -11  20   57.99   11.00
   1 -11 -20   48.20    9.50
  -2  11  20   60.89   14.90
   2 -11  20   60.59   10.80
   2 -11 -20   55.79   10.80
  -2 -11  20   65.49   11.60
   0   0  21    2.30    3.80
   0   0  21    4.90    3.60
  -1   0  21   64.49    9.70
   1   0  21   80.49    9.00
  -1   0  21   81.59   11.50
   1   0  21   85.09    6.40
   2   0  21   70.59    6.00
  -2   0  21   71.89   10.20
  -2   0  21   57.59   12.50
   3   0  21   27.00    4.70
   3   0 -21   42.10    7.60
  -3   0  21   41.90   11.00
  -3   0  21   28.10    8.60
  -4   0  21   94.79   12.80
   4   0 -21  101.19   11.20
  -4   0  21  116.09   16.20
   4   0  21   80.39    7.30
   5   0  21   40.10    6.60
  -5   0  21   30.60    9.90
  -5   0  21   47.70   13.10
   5   0 -21   33.50    8.10
  -6   0  21   39.40   12.60
   6   0  21   32.00    6.30
  -6   0  21   22.30    9.90
  -7   0  21   15.70   10.40
   7   0  21   11.80    5.20
   7   0 -21    9.50    4.40
   7   0 -21   14.50    6.40
   0  -1  21  224.48   14.20
   0  -1  21  248.08   16.50
   0   1  21  207.98   15.50
   0   1  21  204.68   15.20
  -1   1  21   23.10    7.30
  -1   1  21   20.80    6.70
   1  -1  21    5.40    4.20
   1  -1  21   10.90    2.70
   1   1  21    8.30    2.50
  -1  -1  21    3.10    4.30
   1  -1 -21    9.20    4.70
  -1  -1  21   15.00    6.50
  -2   1  21  342.07   22.90
  -2   1  21  389.66   26.50
   2  -1  21  347.37   16.70
   2  -1  21  354.06   20.30
  -2  -1  21  343.77   25.10
   2   1  21  364.36   20.70
   2   1  21  373.56   17.00
   2  -1 -21  340.67   20.50
  -2  -1  21  356.66   22.70
  -3   1  21   19.30    6.30
   3  -1  21   25.40    5.90
  -3   1  21   24.10   10.30
   3  -1  21   25.00    4.50
   3   1  21   23.20    4.30
   3  -1 -21   27.80    6.50
  -3  -1  21   38.90   10.60
  -3  -1  21   21.70    6.90
  -4   1  21   33.90    9.30
  -4   1  21   46.70   12.50
   4  -1  21   41.30    5.80
   4   1 -21   37.00    8.30
  -4  -1  21   42.00   10.10
  -4  -1  21   52.79   12.20
   4   1  21   49.10    5.40
   4  -1 -21   46.40    8.40
  -5   1  21   58.19   14.20
   5   1 -21   36.10    8.70
  -5   1  21   59.59   12.90
   5  -1  21   49.80    6.50
   5   1  21   52.89    6.70
  -5  -1  21   57.79   11.80
   5  -1 -21   40.30    8.90
  -5  -1  21   47.00   13.10
   6   1 -21   36.00    8.50
   6  -1  21   17.70    5.40
  -6   1  21   33.20   11.60
  -6   1  21   23.70    9.00
   6  -1 -21   21.50    7.10
  -6  -1  21   39.60   10.40
  -6  -1  21    2.00    7.90
  -7   1  21   39.30   14.40
   7   1 -21   54.99    7.80
   7   1 -21   54.69    9.70
   7  -1  21   49.99    7.70
   7  -1 -21   40.30   10.00
   7   1  21   33.60    6.50
   7  -1 -21   58.59    8.50
   0  -2 -21   78.79    8.70
   0   2  21   87.39   10.40
   0  -2  21   85.29    8.20
   0  -2  21  105.49   10.50
   0   2  21   78.19    9.90
  -1   2  21   20.90    7.90
  -1  -2 -21   31.70    6.20
   1  -2  21   41.20    4.40
   1  -2  21   35.50    7.30
  -1   2  21   37.80    7.60
   1   2  21   48.00    5.40
   1   2  21   37.70    7.60
  -1  -2  21   32.50    7.30
  -1  -2  21   47.50    9.50
   1  -2 -21   51.69    6.90
   2  -2  21  284.67   14.30
   2  -2  21  262.57   17.20
  -2  -2 -21  295.07   16.40
  -2   2  21  289.87   23.10
  -2   2  21  266.17   20.40
   2  -2 -21  269.67   17.70
  -2  -2  21  288.67   22.20
  -2  -2  21  277.77   19.60
   2   2  21  310.47   18.50
   2   2  21  311.37   14.60
   3  -2  21   53.09    7.10
  -3   2  21   54.09   10.90
  -3   2  21   41.50   11.40
   3  -2  21   42.40    5.40
  -3  -2  21   54.89   10.40
  -3  -2  21   42.80   10.80
   3  -2 -21   47.30    8.60
   3   2  21   63.09    6.00
  -4   2  21   88.19   16.70
  -4   2  21   94.99   13.50
   4  -2  21   70.49    7.20
  -4  -2  21   87.99   15.30
  -4  -2  21   91.69   12.60
   4   2  21   73.09    7.10
   4  -2 -21   91.99   10.80
   5  -2  21   85.39    8.40
  -5   2  21  104.89   19.10
   5   2 -21   98.29   11.20
  -5   2  21   96.89   13.90
   5  -2 -21   97.09   11.60
  -5  -2  21  102.89   14.20
   5   2  21   78.69    8.10
  -5  -2  21   97.29   16.00
  -6   2  21   78.19   16.90
   6   2 -21   61.89   10.50
   6  -2  21   60.79    7.20
   6   2  21   58.99    7.40
   6  -2 -21   53.39   10.80
  -6  -2  21   66.19   13.00
   7  -2  21   81.39    9.30
  -7   2  21   77.69   18.70
   7   2  21   66.39    8.60
   7  -2 -21   74.29   10.00
   7  -2 -21   77.29   11.50
   0  -3  21  166.18   12.90
   0   3  21  118.39   13.10
   0   3  21  157.68   13.60
   0  -3  21  147.19   10.60
   0  -3 -21  140.79   11.30
   1  -3  21  101.09    6.70
   1  -3  21   91.89    9.90
  -1  -3 -21  113.19    9.50
  -1   3  21   78.49   13.90
   1   3  21   94.89    8.90
   1   3  21   90.99   10.30
   1  -3 -21  112.49   10.50
  -1  -3  21  105.79   11.40
  -1  -3  21   90.79   11.30
   2  -3  21   22.10    3.90
  -2   3  21   29.30    7.70
   2  -3  21   27.40    6.30
  -2  -3 -21   21.20    5.10
  -2   3  21   23.50    9.30
  -2  -3  21   23.40    7.40
   2  -3 -21   23.40    5.90
   2   3  21   17.20    5.70
  -2  -3  21   39.60    9.60
   2   3  21   20.10    3.90
   3  -3  21   23.40    4.50
   3  -3  21   25.20    6.30
  -3   3  21   19.50    7.30
  -3   3  21   41.30   11.00
  -3  -3  21    8.20    7.30
   3   3  21   25.00    4.30
  -3  -3  21   31.50    7.70
   3  -3 -21   23.60    6.50
  -4   3  21   12.30    9.20
  -4   3  21    4.20    6.30
   4  -3  21    8.90    3.50
   4   3  21    6.90    3.20
  -4  -3  21    7.50    6.80
   4  -3 -21    5.40    4.90
   5  -3  21   14.10    4.60
  -5   3  21   31.70   12.70
   5  -3 -21   18.90    6.80
   5   3  21   16.60    4.30
  -5  -3  21   13.10    7.30
   6   3 -21  118.69   12.80
   6  -3  21  123.29   10.20
  -6  -3  21  125.49   16.70
   6  -3 -21  149.49   14.10
   6   3  21  118.29   10.20
   0  -4  21  159.18   11.40
   0  -4  21  184.58   14.40
   0   4  21  175.58   14.80
   0  -4 -21  199.78   13.60
   1  -4  21   93.89   10.10
  -1   4  21   97.79   11.90
   1  -4  21  100.69    6.80
  -1   4  21   91.79   13.90
  -1  -4 -21   91.79    8.90
   1  -4 -21   98.19   10.00
  -1  -4  21  112.59   10.70
  -1  -4  21   79.79   10.70
   1   4  21  123.49   11.70
   1   4  21   89.39   10.00
   2  -4  21    5.90    2.60
  -2   4  21   13.40    6.60
  -2   4  21   17.90    7.90
   2  -4  21    8.40    4.40
  -2  -4  21    3.80    5.10
   2  -4 -21   -0.90    3.90
   2   4  21    7.50    2.60
   3  -4  21  141.09    9.50
   3  -4  21  147.79   12.00
  -3   4  21  130.99   17.90
  -3  -4  21  136.49   13.90
   3  -4 -21  137.29   12.80
   3   4  21  132.79    9.10
   4  -4  21  214.38   12.90
  -4   4  21  246.98   24.50
  -4  -4  21  192.68   17.60
   4   4  21  213.48   12.60
   4  -4 -21  206.98   16.60
  -5   4  21  155.58   20.20
  -5  -4  21  143.99   16.20
   5  -4 -21  133.79   13.90
   5   4  21  159.68   10.90
  -6   4  21   14.70   11.80
   6  -4  21   30.90    6.20
   6   4 -21   20.40    7.30
  -6  -4  21   19.20    8.90
   6   4  21   28.70    5.80
   6  -4 -21   21.50    8.20
   0  -5  21   43.50    8.10
   0   5  21   34.50    9.70
   0  -5 -21   32.50    6.60
   1  -5  21   71.09    5.40
   1  -5  21   75.19    8.50
  -1  -5 -21   69.89    8.50
  -1   5  21   92.69   15.40
   1   5  21   58.09    8.70
  -1  -5  21   68.49    9.70
   1  -5 -21   75.79    9.10
   2  -5  21  109.59   10.80
   2  -5  21  103.79    7.30
  -2   5  21  103.29   15.20
   2   5  21   91.89    8.80
  -2  -5  21   98.29   11.10
   2  -5 -21  100.79   10.80
   3  -5  21   10.30    4.70
   3  -5  21   11.60    3.50
  -3   5  21    0.30    6.70
   3  -5 -21    5.40    3.90
   3   5  21   13.80    3.50
  -3  -5  21   12.30    6.70
   4  -5  21   24.40    4.90
  -4   5  21   33.70   12.00
   4  -5 -21   20.60    7.20
   4   5  21   19.70    4.00
  -4  -5  21   24.80    7.90
   5  -5  21  130.59   10.30
  -5   5  21  156.68   21.70
   5   5  21  105.99    8.80
  -5  -5  21   93.09   14.10
   5  -5 -21  135.89   14.10
  -6   5  21   95.49   19.70
   6   5  21   52.79    6.90
   6  -5 -21   73.59   12.20
  -6  -5  21   69.19   12.70
   0   6  21   50.79   11.60
   0  -6 -21   46.80    7.80
   0  -6  21   56.69    8.50
   1  -6  21   26.90    6.80
  -1   6  21   19.30    8.80
  -1  -6 -21   23.00    5.70
   1  -6 -21   14.70    5.80
   1   6  21    8.70    5.40
  -1  -6  21   23.70    6.70
   2  -6  21  252.27   17.00
  -2   6  21  246.48   23.30
  -2  -6  21  284.87   19.40
   2   6  21  224.98   16.40
   2  -6 -21  250.27   17.60
   3  -6  21   93.09    7.70
   3  -6  21  101.29   10.50
  -3   6  21   80.29   16.40
   3  -6 -21   85.19   11.00
  -3  -6  21   88.79   12.00
   3   6  21  115.79    8.90
   4  -6  21  165.78   13.30
  -4   6  21  197.38   22.90
   4   6  21  159.88   10.60
   4  -6 -21  178.98   15.50
  -4  -6  21  152.78   16.40
   5  -6  21   49.70    6.90
   5   6  21   51.29    6.20
   5  -6 -21   47.80    9.80
   6  -6  21   89.39    9.30
  -6   6  21   72.19   18.60
   6   6  21   69.39    7.50
   6  -6 -21   94.79   12.80
   0  -7 -21  351.36   20.80
   0   7  21  302.57   25.20
   0  -7  21  375.86   21.90
  -1   7  21   84.29   15.50
   1  -7  21   88.49   10.40
  -1  -7 -21   98.39    9.80
   1  -7 -21   97.69   10.50
   1   7  21   78.19   13.70
  -1  -7  21   85.69   10.60
  -2   7  21   40.00   12.50
   2  -7  21   38.80    8.00
   2   7  21   30.10    8.10
   2  -7 -21   38.30    8.50
   3  -7  21  100.69   10.50
  -3   7  21   71.09   16.00
  -3  -7  21   95.09   11.90
   3   7  21   68.39    8.60
   3  -7 -21   82.69   10.10
   4  -7  21   68.89    9.90
  -4   7  21   67.89   16.50
   4  -7 -21   75.89   11.10
  -4  -7  21   45.70   10.70
   4   7  21   70.19    7.10
  -5   7  21   10.00   11.10
   5  -7  21    8.10    6.00
   5  -7 -21   -0.50    5.40
   5   7  21   10.60    3.90
   0   8  21   27.30    9.80
   0  -8 -21   38.30    7.50
   0  -8  21   39.10    8.40
   1  -8  21   43.60    8.70
  -1   8  21   28.60   10.00
   1  -8 -21   39.40    8.30
   1   8  21   36.50   10.50
  -1  -8  21   39.00    8.40
   2  -8  21   28.30    7.40
  -2   8  21   27.50   11.60
   2   8  21   18.90    7.10
  -2  -8  21   42.20    9.50
   2  -8 -21   41.90    8.70
   3  -8  21   26.60    7.00
  -3   8  21   36.60   13.30
  -3  -8  21   51.59   10.20
   3   8  21   36.50    8.50
   3  -8 -21   24.80    7.90
  -4   8  21   61.69   16.20
   4  -8  21   67.59   11.10
   4   8  21   74.49    8.60
   4  -8 -21   74.99   11.30
  -5   8  21   53.39   15.90
   5  -8 -21   52.09   11.10
  -5  -8  21   40.10   10.60
   0  -9  21   68.59   10.40
   0  -9 -21   71.69    9.40
   0   9  21   61.59   13.90
  -1   9  21   25.50   11.00
   1  -9  21   21.60    7.40
  -1  -9  21   32.20    7.30
   1   9  21   38.30   11.00
  -2   9  21   49.80   13.20
   2  -9  21   30.10    8.10
   2  -9 -21   48.60    9.50
   2   9  21   24.60   10.00
  -2  -9  21   49.70    9.50
  -3   9  21   43.60   13.20
   3  -9  21   45.50    9.20
  -3  -9  21   29.00    8.60
   3  -9 -21   49.10   10.50
   3   9  21   39.20   10.00
  -4   9  21   28.90   14.20
  -4  -9  21   22.40    7.80
   4  -9 -21   49.30   10.50
   0 -10 -21    2.00    4.70
   0 -10  21    6.60    5.90
   0  10  21    4.80    6.90
   1 -10  21    5.80    5.80
  -1  10  21    1.30    7.30
   1  10  21    8.70    8.00
  -1 -10  21   -0.10    5.40
   1 -10 -21    2.10    4.60
  -2  10  21   35.70   12.60
   2 -10  21   27.90    8.20
   2 -10 -21   45.40    9.80
  -2 -10  21   57.79   11.10
  -3  10  21   69.39   17.80
   3 -10  21   33.60    9.20
  -3 -10  21   34.50    9.50
   3 -10 -21   49.20   10.40
   0 -11  21   78.59   11.60
   0 -11 -21   83.69   13.50
   1 -11  21  112.69   14.10
   1 -11 -21  156.78   14.70
  -1 -11  21  138.69   15.00
   0   0  22    6.50    4.00
   1   0  22   89.69   10.50
  -1   0  22   91.79   12.50
   1   0  22   98.09    7.30
  -1   0  22   80.29   11.00
   2   0  22  146.19   12.00
  -2   0  22  129.69   16.10
  -2   0  22  168.98   15.00
   2   0  22  148.19    9.10
   3   0 -22  388.46   23.40
  -3   0  22  390.86   26.10
   3   0  22  426.66   19.70
  -3   0  22  420.06   30.10
  -4   0  22   -3.70    6.80
  -4   0  22   -1.60    5.30
   4   0 -22    6.20    5.30
   5   0  22   20.90    5.20
  -5   0  22   24.90    9.50
  -5   0  22   28.20   10.90
  -6   0  22   61.79   13.40
   6   0 -22   35.90    8.70
   6   0  22   49.80    7.20
   0  -1 -22   21.90    5.60
   0   1  22   21.20    6.60
   0   1  22   19.80    6.40
   0  -1  22   28.00    7.00
   0  -1  22   24.00    5.60
  -1   1  22   17.20    6.90
  -1   1  22   20.00    8.00
   1  -1  22   22.00    3.90
   1  -1  22   30.10    7.00
   1  -1 -22   18.80    5.80
  -1  -1  22   21.50    6.40
   1   1  22   21.70    4.30
   1   1  22   27.10    6.50
  -1  -1  22   37.20    9.10
   2  -1  22  101.69   10.60
  -2   1  22  101.39   12.20
  -2   1  22   76.79   14.40
   2  -1  22   93.89    7.10
   2   1  22   93.79    7.10
  -2  -1  22   93.89   11.90
   2   1  22  114.79   10.80
   2  -1 -22  104.39   10.70
  -2  -1  22   89.59   13.70
  -3   1  22   27.80   10.40
   3  -1  22   37.10    7.20
   3  -1  22   38.60    5.20
  -3   1  22   31.10    8.80
  -3  -1  22   36.40   10.80
  -3  -1  22   42.00    9.30
   3  -1 -22   46.80    8.90
   3   1  22   35.00    5.00
   4  -1  22    7.40    3.50
   4   1 -22   -0.80    4.50
  -4   1  22    1.30    6.10
  -4   1  22   20.60    9.20
   4  -1 -22    5.90    4.90
  -4  -1  22   -1.00    6.20
  -4  -1  22   -7.30    5.90
   4   1  22   -2.00    2.50
   5  -1  22   15.90    4.60
  -5   1  22   17.20    9.00
   5   1  22   18.90    4.80
  -5  -1  22    3.60    8.00
   5  -1 -22   15.30    6.50
  -5  -1  22    9.40    7.40
   6  -1  22   99.69    9.70
  -6   1  22  126.39   18.90
   6   1 -22  103.89   12.20
  -6   1  22  114.29   15.60
   6  -1 -22  110.29   12.90
  -6  -1  22   76.19   14.90
  -6  -1  22  127.69   19.20
   6   1  22   95.09    9.40
   0   2  22   55.59    9.90
   0  -2 -22   66.39    8.60
   0   2  22   62.19    9.30
   0  -2  22   69.89    9.30
   0  -2  22   56.59    7.40
  -1  -2 -22  255.37   16.10
   1  -2  22  290.87   13.90
  -1   2  22  258.77   20.90
  -1   2  22  278.67   20.00
   1  -2  22  278.07   18.10
   1  -2 -22  273.17   17.50
  -1  -2  22  286.87   19.40
   1   2  22  254.07   17.90
   1   2  22  290.77   16.00
  -1  -2  22  266.07   20.10
   2  -2  22   22.70    6.60
  -2   2  22   21.70    7.20
  -2  -2 -22   19.90    5.10
   2  -2  22   30.60    4.30
  -2   2  22   32.20    9.40
  -2  -2  22   27.10    8.70
  -2  -2  22   28.20    7.20
   2  -2 -22   24.30    6.20
   2   2  22   28.60    3.80
   2   2  22   22.40    5.80
  -3   2  22   30.90    9.60
   3  -2  22    7.00    4.70
   3  -2  22   14.00    3.40
  -3   2  22   13.30    7.30
  -3  -2  22   23.70    8.20
   3  -2 -22   15.40    6.10
   3   2  22   17.40    3.90
  -3  -2  22    7.90    7.30
   4  -2  22  147.39   10.10
  -4   2  22  117.89   19.60
   4   2  22  148.29    9.90
   4  -2 -22  149.09   13.70
  -4  -2  22  121.49   16.30
  -4  -2  22  118.99   14.50
  -5   2  22   20.40   10.20
   5   2 -22   17.70    7.20
  -5   2  22   16.50    8.30
   5  -2  22    7.90    4.10
  -5  -2  22   22.90    9.30
   5  -2 -22    5.60    5.40
   5   2  22   11.00    3.90
  -5  -2  22   11.60    9.70
   6   2 -22  103.69   12.60
  -6   2  22  112.89   20.70
   6  -2  22   90.99    8.80
   6  -2 -22   70.69   12.10
   6   2  22   97.89    9.30
  -6  -2  22  129.89   17.10
   0  -3  22   33.00    7.90
   0   3  22   41.80    9.10
   0  -3  22   45.60    6.60
   0   3  22   48.50    9.10
   0  -3 -22   51.39    7.30
   1  -3  22   89.19    9.80
  -1  -3 -22   96.89    9.10
  -1   3  22   83.89   11.40
  -1   3  22   66.89   13.20
   1  -3  22   90.19    6.50
   1   3  22   89.39    9.20
   1   3  22   76.19    9.80
   1  -3 -22   92.69    9.90
  -1  -3  22   89.89   10.70
  -1  -3  22   95.69   11.90
  -2   3  22   48.90   12.20
   2  -3  22   63.69    8.50
  -2   3  22   69.09   12.00
   2   3  22   54.29    5.80
  -2  -3  22   55.29    9.80
   2  -3 -22   66.79    8.90
   2   3  22   60.69    8.40
  -2  -3  22   57.89   11.60
   3  -3  22   10.40    3.40
  -3   3  22   11.90    6.50
   3  -3  22   15.00    5.70
  -3   3  22   18.50    9.70
   3   3  22   15.40    3.80
  -3  -3  22   32.20    9.10
   3  -3 -22    9.40    5.20
  -3  -3  22    7.30    5.60
   4  -3  22   77.39    7.50
  -4   3  22   61.99   12.70
  -4   3  22   80.09   16.70
   4   3  22   67.29    6.90
   4  -3 -22   77.29   10.70
  -4  -3  22   76.89   12.80
   5  -3  22   49.00    6.80
  -5   3  22   52.29   14.40
   5   3 -22   48.60    9.80
   5  -3 -22   42.50    9.60
   5   3  22   51.69    6.60
  -5  -3  22   55.59   12.00
   6  -3  22   39.70    6.90
  -6   3  22   53.29   15.10
   6   3 -22   29.40    8.00
  -6  -3  22   38.70   11.40
   6  -3 -22   41.10    9.20
   6   3  22   27.90    5.50
   0  -4 -22   20.30    5.90
   0  -4  22   26.90    6.80
   0   4  22   24.60    7.90
   0   4  22   20.80    6.30
   0  -4  22   18.00    5.00
  -1   4  22   19.50    8.60
  -1  -4 -22   30.80    6.10
   1  -4  22   36.80    7.60
   1  -4  22   24.20    3.50
  -1   4  22   16.70    6.60
  -1  -4  22   12.50    5.80
   1   4  22   39.70    7.40
   1  -4 -22   30.90    6.90
  -1  -4  22   13.50    6.70
   1   4  22   40.60    7.90
  -2   4  22   51.99   10.70
  -2   4  22   82.59   15.20
   2  -4  22   73.19    9.00
   2  -4  22   63.79    5.90
   2  -4 -22   60.69    8.80
  -2  -4  22   79.39   10.80
   2   4  22   68.59    7.00
   3  -4  22  131.89   12.00
   3  -4  22  147.99   10.00
  -3   4  22  161.68   18.80
   3   4  22  161.38   10.10
   3  -4 -22  159.08   14.10
  -3  -4  22  160.08   15.50
   4  -4  22   28.70    5.30
  -4   4  22   13.50    8.70
  -4  -4  22   38.10    9.90
   4   4  22   30.30    5.20
  -5   4  22   69.79   16.50
  -5  -4  22   60.89   12.60
   5  -4 -22   33.10    8.40
   5   4  22   35.40    6.00
   6  -4  22   56.79    7.80
   6   4 -22   54.79   10.30
  -6   4  22   51.49   15.90
   6  -4 -22   48.30   10.80
   0   5  22   21.80    7.80
   0  -5  22   17.70    6.10
   0  -5 -22   19.30    5.70
   1  -5  22   36.60    4.40
   1  -5  22   56.29    9.00
  -1   5  22   47.80   11.70
  -1  -5 -22   35.20    6.50
   1   5  22   28.50    7.80
   1  -5 -22   38.70    7.50
  -1  -5  22   36.80    8.00
   2  -5  22   56.19    5.60
   2  -5  22   69.19    8.90
  -2  -5  22   74.99   10.60
   2  -5 -22   76.09    9.70
   2   5  22   68.59    7.90
   3  -5  22   25.20    6.50
  -3   5  22   41.30   13.10
   3  -5  22   43.20    5.30
   3   5  22   25.40    4.90
   3  -5 -22   35.20    8.00
  -3  -5  22   42.00    9.80
   4  -5  22   39.70    5.90
  -4   5  22   27.30   12.60
   4  -5 -22   36.90    8.70
   4   5  22   40.60    5.50
  -5   5  22   64.19   16.30
   5  -5  22   53.89    7.00
  -5  -5  22   54.19   11.80
   5  -5 -22   60.19   10.80
   5   5  22   62.29    6.80
   6   5 -22   45.30   10.10
  -6   5  22   23.60   12.50
   6  -5  22   41.60    7.30
   6   5  22   49.70    6.50
   6  -5 -22   43.90   10.20
  -6  -5  22   43.10   11.10
   0  -6 -22  167.78   13.10
   0  -6  22  130.29   13.00
   0   6  22  177.88   18.00
  -1   6  22   60.59   13.60
   1  -6  22   65.79    8.50
  -1  -6 -22   65.59    8.30
   1   6  22   62.39   11.60
   1  -6 -22   57.49    9.30
  -1  -6  22   65.09   10.00
  -2   6  22  163.38   19.60
   2  -6  22  157.88   13.20
  -2  -6  22  182.28   15.60
   2  -6 -22  148.89   13.70
   2   6  22  162.88   14.10
   3  -6  22   37.50    5.40
  -3   6  22   52.29   13.70
   3  -6  22   47.70    8.50
   3   6  22   44.00    6.40
  -3  -6  22   43.80    9.90
   3  -6 -22   57.49   10.30
  -4   6  22   47.60   14.60
   4  -6  22   41.00    8.80
   4  -6  22   39.60    6.00
  -4  -6  22   26.60    8.60
   4   6  22   35.70    5.40
   4  -6 -22   43.60    9.40
   5  -6  22   19.30    5.10
  -5   6  22   27.30   13.60
   5   6  22   21.30    4.70
  -5  -6  22   24.40    8.90
   5  -6 -22   11.80    7.00
   0  -7  22   49.70    9.40
   0  -7 -22   61.39    8.40
   0   7  22   36.80   11.00
   1  -7  22   38.00    8.10
  -1  -7 -22   39.50    7.40
  -1   7  22   57.39   13.40
   1   7  22   44.10   10.00
   2  -7  22   89.79   10.70
  -2   7  22   68.19   14.60
  -2  -7  22   89.69   11.90
   2   7  22   50.49   10.30
   2  -7 -22   68.69   10.00
  -3   7  22   33.10   12.00
   3  -7  22   60.89    9.10
   3  -7 -22   49.30    9.80
   3   7  22   58.79    8.50
  -3  -7  22   56.59   10.80
  -4   7  22   51.89   15.50
   4  -7  22   60.79    9.00
  -4  -7  22   49.20   10.60
   4  -7 -22   55.29   10.90
   4   7  22   47.10    6.50
  -5   7  22   13.40   12.10
  -5  -7  22   17.00    7.60
   5  -7 -22    1.60    5.50
   5   7  22    4.00    3.30
   0  -8  22   -1.40    4.30
   0   8  22   11.70    7.70
   0  -8 -22    7.30    5.00
   1  -8  22   33.40    8.20
  -1   8  22   26.00   10.00
  -1  -8  22   38.30    8.80
   1  -8 -22   32.00    7.10
   1   8  22   22.10    8.80
   2  -8  22   14.70    6.00
  -2   8  22    8.00    8.40
  -2  -8  22   13.30    7.00
   2  -8 -22   16.80    6.50
   2   8  22   22.90    8.10
  -3   8  22    4.40    8.50
   3  -8  22   12.80    5.60
   3   8  22   11.10    5.60
  -3  -8  22    8.10    5.90
   3  -8 -22    5.80    5.50
  -4   8  22    2.10    9.60
   4  -8  22   11.80    5.90
  -4  -8  22   19.30    8.00
   4  -8 -22    6.10    6.50
   4   8  22    3.10    4.00
   0   9  22  238.98   23.60
   0  -9  22  299.17   21.00
   0  -9 -22  311.97   19.60
   1  -9  22   43.40    8.60
  -1   9  22   17.80   10.40
  -1  -9  22   41.10    9.30
   1   9  22   24.80    9.30
   1  -9 -22   54.29    9.60
  -2   9  22  123.79   18.00
   2   9  22   96.29   16.20
  -2  -9  22   84.39   12.30
   2  -9 -22   77.49   11.20
   3  -9  22    0.90    4.50
  -3   9  22   -3.70    7.10
   3  -9 -22   10.00    7.10
   3   9  22    9.20    5.80
  -3  -9  22    6.20    6.60
   0  10  22   13.00    8.00
   0 -10  22   12.90    7.00
   1 -10  22   65.69   11.30
  -1  10  22   53.69   13.40
  -1 -10  22   54.19   10.60
   1 -10 -22   39.90    9.10
   1  10  22   64.39   14.10
  -2  10  22   -3.20    7.80
   2 -10  22    5.90    5.60
  -2 -10  22   -0.40    5.50
   2 -10 -22   -4.20    5.00
   0   0  23    5.30    4.70
   0   0  23    7.70    4.90
   1   0  23   36.00    4.60
  -1   0  23   27.20    8.70
  -1   0  23   20.80    7.10
   1   0  23   26.00    7.10
   2   0  23   -3.10    4.00
   2   0 -23   -3.80    4.10
  -2   0  23   -3.90    4.20
   2   0  23   -0.80    1.90
  -2   0  23   -5.30    4.90
   3   0  23  113.99    8.40
  -3   0  23   94.69   16.50
  -3   0  23   83.79   11.80
   3   0 -23   99.99   10.60
   4   0 -23  144.09   14.20
  -4   0  23  159.58   16.00
   4   0  23  135.09   10.10
  -4   0  23  162.68   19.40
   5   0 -23  302.37   21.00
  -5   0  23  318.57   24.60
   5   0  23  294.67   16.80
  -5   0  23  239.88   25.10
  -6   0  23   -1.20    8.40
   6   0 -23    6.00    5.20
   6   0  23    2.10    4.00
  -6   0  23    4.70    7.90
   0   1  23    1.70    4.00
   0  -1  23   -3.30    3.50
   0   1  23   -1.50    3.70
   0  -1  23    0.40    3.30
   0  -1 -23    3.60    4.10
   1  -1  23   47.80    5.40
   1  -1  23   45.00    8.60
  -1   1  23   74.39   13.10
  -1   1  23   50.29   10.10
  -1  -1 -23   54.69    7.60
   1   1  23   46.80    6.20
   1  -1 -23   48.80    8.30
  -1  -1  23   47.10   10.40
  -1  -1  23   62.29    9.40
   1   1  23   70.69    9.20
  -2   1  23   12.10    7.80
   2  -1  23    2.00    4.00
  -2   1  23    2.10    5.30
  -2  -1 -23    7.90    4.50
   2  -1  23    5.50    2.40
   2   1  23    3.20    2.30
  -2  -1  23   -0.40    5.80
  -2  -1  23   -0.10    5.20
   2  -1 -23    4.30    4.90
   2   1  23    7.10    5.00
  -3   1  23   68.09   12.30
  -3   1  23   65.59   14.90
   3  -1  23   87.29    7.30
   3  -1 -23   92.19   10.80
  -3  -1  23   80.99   12.00
  -3  -1  23   65.49   14.10
   3   1  23   79.39    7.10
   4   1 -23   -2.20    4.40
   4  -1  23    1.10    2.80
  -4  -1  23    5.30    8.10
  -4  -1  23   -1.30    6.00
   4  -1 -23   -8.20    4.20
   4   1  23    2.80    3.10
   5   1 -23   19.00    7.10
  -5   1  23   -0.60    8.00
  -5   1  23    7.90    8.00
  -5  -1  23    8.40   10.30
   5  -1 -23   20.40    7.20
  -5  -1  23   11.30    8.00
  -6   1  23   52.69   12.10
   6  -1  23   22.60    5.90
  -6   1  23   29.80   12.70
   6   1 -23   24.50    8.10
   6   1  23   36.20    6.70
  -6  -1  23   36.80   11.00
   6  -1 -23   29.90    8.50
  -6  -1  23   29.80   11.30
   0   2  23  389.76   24.40
   0  -2  23  389.56   23.20
   0  -2  23  342.87   20.80
   0  -2 -23  385.36   21.10
   0   2  23  346.47   22.70
   1  -2  23   20.20    6.20
  -1   2  23   12.10    6.30
  -1   2  23   27.90    8.80
   1  -2  23   28.00    4.20
  -1  -2  23   15.50    7.10
   1   2  23   33.90    6.30
   1  -2 -23   21.70    6.20
  -1  -2  23   28.00    7.60
   1   2  23   32.90    7.40
   2  -2  23  122.49    8.30
  -2   2  23  111.59   15.80
  -2  -2 -23  128.69   10.70
   2  -2  23  107.39   10.90
  -2   2  23  111.99   13.00
   2   2  23  102.89    8.10
  -2  -2  23  132.49   13.30
   2  -2 -23  110.39   10.70
  -2  -2  23  126.39   16.00
   2   2  23  121.89   11.80
  -3   2  23   64.99   12.10
   3  -2  23   79.39    9.10
  -3   2  23   81.89   16.00
   3  -2  23   64.59    6.10
   3  -2 -23   48.70    9.10
   3   2  23   59.99    6.20
  -3  -2  23   53.69   11.20
  -3  -2  23   49.30   12.60
  -4   2  23  234.08   20.40
   4  -2  23  236.98   14.30
  -4   2  23  243.38   24.90
  -4  -2  23  266.47   23.80
  -4  -2  23  262.27   21.10
   4   2  23  253.57   14.40
   4  -2 -23  253.07   18.60
   5  -2  23   -2.20    3.40
   5   2 -23    1.00    5.20
  -5   2  23   -4.30    4.90
  -5   2  23   -7.10    7.00
   5   2  23    3.70    3.00
  -5  -2  23    4.50    6.50
   5  -2 -23    1.00    4.90
  -6   2  23   13.80   10.50
   6   2 -23    0.50    4.70
   6  -2  23   -0.60    3.80
  -6  -2  23   -7.10    6.40
   6  -2 -23   -3.80    4.70
   6   2  23    1.60    3.40
   0   3  23   35.40    8.40
   0  -3  23   32.20    6.70
   0   3  23   31.60    7.70
   0  -3 -23   23.50    5.90
  -1   3  23  142.39   14.40
  -1   3  23  137.89   16.40
   1  -3  23  152.48    9.20
  -1  -3 -23  149.69   12.00
   1  -3  23  159.98   13.20
  -1  -3  23  114.29   12.80
  -1  -3  23  135.39   14.90
   1   3  23  154.78   12.80
   1  -3 -23  147.99   12.40
   1   3  23  129.69   13.20
   2  -3  23    9.00    4.80
  -2   3  23    7.10    6.50
  -2   3  23    7.20    7.20
   2  -3  23    3.80    2.50
   2  -3 -23    3.20    4.40
  -2  -3  23   -2.70    4.20
   2   3  23    5.70    4.50
  -2  -3  23    5.40    5.30
  -3   3  23  139.59   18.60
   3  -3  23   91.89    9.60
   3  -3  23  101.39    8.00
  -3   3  23  127.09   14.80
  -3  -3  23   90.09   13.90
  -3  -3  23  118.79   13.50
   3  -3 -23   93.19   11.20
   3   3  23   84.79    7.20
   4  -3  23   25.00    5.30
  -4   3  23    0.20    9.00
  -4   3  23   23.20    8.80
  -4  -3  23   12.10    7.20
   4   3  23   19.90    4.30
   4  -3 -23   16.00    6.40
  -5   3  23    5.10    8.60
   5  -3  23    5.80    3.70
  -5  -3  23    7.30    7.60
   5  -3 -23   -1.70    5.10
   5   3  23    8.20    3.90
   6  -3  23   36.60    6.90
   6   3 -23   47.40   10.20
  -6   3  23   53.09   15.30
   6   3  23   56.79    7.30
   6  -3 -23   36.50    9.10
  -6  -3  23   61.99   13.80
   0  -4  23   10.90    5.10
   0   4  23   -1.10    3.90
   0   4  23    9.00    6.10
   0  -4  23    8.40    4.20
   0  -4 -23    6.80    4.30
  -1   4  23   -3.30    4.20
   1  -4  23    2.90    4.20
  -1   4  23    4.70    5.00
   1  -4  23   -0.50    1.60
  -1  -4 -23   -4.40    2.80
  -1  -4  23   -3.30    3.90
   1   4  23   -1.30    2.60
   1  -4 -23    0.50    4.00
   1   4  23   -3.70    4.20
  -1  -4  23   -2.40    4.90
  -2   4  23   65.09   13.80
  -2   4  23   85.09   11.90
   2  -4  23   49.50    8.90
   2  -4  23   66.99    6.00
   2   4  23   63.89    7.40
  -2  -4  23   69.99    9.80
   2  -4 -23   68.09    9.40
   3  -4  23   10.70    3.60
  -3   4  23    8.40    8.10
   3  -4  23   20.10    6.30
   3   4  23    5.60    3.20
  -3  -4  23    1.20    5.50
   3  -4 -23   13.20    5.70
   4  -4  23   22.50    5.00
  -4   4  23   25.30   11.50
   4  -4 -23   29.10    8.00
   4   4  23   17.60    4.40
  -4  -4  23   27.10    7.90
  -5   4  23    0.40    8.60
   5  -4  23    0.00    3.00
   5  -4 -23   -3.60    4.90
   5   4  23    1.10    2.70
  -5  -4  23   -3.10    5.80
  -6   4  23   54.69   16.80
   6   4 -23   92.69   12.00
  -6  -4  23   84.29   15.20
   6  -4 -23   71.99   12.80
   6   4  23   96.49    9.00
   0   5  23    6.60    6.30
   0  -5 -23    4.70    4.20
   0  -5  23    3.20    4.80
   1  -5  23  129.99    8.60
   1  -5  23  134.09   12.60
  -1  -5 -23  137.49   11.40
   1  -5 -23  109.99   11.40
   1   5  23   96.59   12.70
  -1  -5  23  150.48   13.80
   2  -5  23   20.70    6.40
  -2   5  23   16.60    9.20
  -2  -5  23   21.50    7.40
   2  -5 -23   25.10    6.60
   2   5  23   24.40    6.00
  -3   5  23  296.57   26.90
   3  -5  23  268.87   18.10
   3  -5  23  268.67   14.70
  -3  -5  23  270.77   21.20
   3   5  23  287.17   15.60
   3  -5 -23  264.47   19.00
  -4   5  23    3.60    8.70
   4  -5  23    4.00    3.60
   4  -5 -23   -1.30    4.90
  -4  -5  23   -4.50    4.40
   4   5  23    1.70    2.30
  -5   5  23   14.80    9.60
   5  -5  23   -1.50    3.20
   5   5  23    2.70    3.00
   5  -5 -23   -5.60    4.80
  -5  -5  23   10.00    8.00
   0   6  23   22.80    9.20
   0  -6  23   24.30    7.30
   0  -6 -23   27.10    7.10
  -1   6  23   28.60   11.10
  -1  -6 -23   35.70    7.40
   1  -6  23   28.80    7.30
  -1  -6  23   46.70    9.60
   1  -6 -23   26.40    6.90
   1   6  23   37.60    9.60
   2  -6  23   -3.60    4.00
  -2   6  23   17.30    9.00
   2   6  23    1.60    4.30
   2  -6 -23   -3.00    4.40
  -2  -6  23    6.80    5.20
   3  -6  23    2.10    2.90
  -3   6  23    7.40    6.80
   3  -6  23    5.20    4.60
  -3  -6  23   11.80    7.00
   3  -6 -23   12.50    6.60
   3   6  23    5.30    3.90
  -4   6  23    3.20    8.30
   4  -6  23   11.20    4.00
   4  -6 -23   11.90    7.00
   4   6  23   16.70    4.40
  -4  -6  23    6.70    6.50
   5  -6  23    8.90    4.00
  -5   6  23   -3.00    8.90
   5   6  23    7.60    3.40
  -5  -6  23    5.90    7.30
   0  -7 -23    6.40    4.40
   0   7  23   -4.90    5.00
   0  -7  23    3.10    4.80
   1  -7  23  238.48   17.30
  -1   7  23  176.58   19.70
  -1  -7  23  219.38   17.80
   1   7  23  188.18   19.40
   1  -7 -23  242.38   16.90
  -2   7  23   76.99   15.70
   2  -7  23   67.29   10.60
  -2  -7  23   56.59   11.30
   2   7  23   56.39   11.20
   2  -7 -23   57.69   10.20
   3  -7  23   -1.90    3.90
  -3   7  23    5.20    6.80
   3   7  23    0.10    3.70
   3  -7 -23    5.50    5.80
  -3  -7  23    2.60    6.10
  -4   7  23   -3.20    7.80
   4  -7  23    8.20    7.10
   4   7  23    1.30    3.10
   4  -7 -23    2.60    6.00
  -4  -7  23   -2.00    5.30
   0  -8  23   32.60    8.00
   0   8  23   12.50    8.20
   0  -8 -23   22.90    6.50
   1  -8  23   -3.50    4.90
  -1   8  23    3.90    8.20
   1   8  23   12.90    7.60
  -1  -8  23    1.30    5.40
   1  -8 -23    2.00    4.80
   2  -8  23   70.69   10.60
  -2   8  23   69.49   16.30
  -2  -8  23   76.29   11.70
   2  -8 -23   81.79   10.90
   2   8  23  103.59   14.10
   3  -8  23   89.79   11.40
  -3   8  23  136.09   20.10
  -3  -8  23   93.69   12.90
   3  -8 -23  123.79   13.40
   4  -8  23   27.40    7.40
  -4   8  23   36.30   14.30
   4  -8 -23   36.30    9.50
  -4  -8  23   18.80    7.90
   0   9  23    9.20    7.50
   0  -9  23   -3.00    4.50
   0  -9 -23    5.60    4.70
  -1   9  23   -2.80    7.20
   1  -9  23    4.60    5.60
   1   9  23    7.70    7.20
   1  -9 -23    3.80    5.50
  -1  -9  23    4.90    5.50
   2  -9  23    8.20    5.80
  -2   9  23   13.80    9.90
  -2  -9  23   24.80    8.80
   2  -9 -23    6.70    5.80
   2   9  23   10.80    8.40
   3  -9  23    0.40    4.90
  -3   9  23    2.70    9.60
   3  -9 -23    1.20    5.20
   3   9  23   -0.40    5.80
  -3  -9  23    6.00    6.60
   0  10  23  114.69   17.30
   0 -10 -23  123.39   13.30
   0 -10  23  108.09   13.40
   1 -10  23   11.80    6.10
  -1  10  23   10.20    8.30
   1  10  23    4.40    7.40
  -2  10  23   19.10   10.20
   0   0  24  126.49   13.00
   0   0  24  142.29   13.60
   1   0  24  103.19    8.70
  -1   0  24   89.79   12.20
   1   0  24   82.09   10.70
   2   0  24    5.60    2.80
  -2   0  24    0.60    4.70
   2   0  24    8.10    5.20
  -2   0  24    8.70    7.10
   2   0 -24    9.50    5.20
  -3   0  24  124.99   17.80
  -3   0  24  160.58   16.60
   3   0 -24  139.59   13.80
   3   0  24  149.69   10.00
   4   0  24   48.60    6.40
   4   0 -24   49.90    9.90
  -4   0  24   62.29   12.50
  -4   0  24   49.10   13.20
   5   0 -24  171.88   15.90
  -5   0  24  214.68   23.20
   5   0  24  183.58   12.50
  -5   0  24  138.19   17.40
  -6   0  24   26.80   11.60
   6   0 -24   10.00    6.10
   6   0  24   23.10    6.00
  -6   0  24   23.90    9.60
   0  -1  24    2.30    4.40
   0  -1 -24    0.00    3.70
   0   1  24   -4.10    3.90
   0   1  24    2.00    4.60
   0  -1  24    2.80    4.30
  -1  -1 -24    1.20    3.90
  -1   1  24    7.00    5.30
   1  -1  24    8.70    5.40
   1  -1  24    4.00    2.80
  -1   1  24    4.20    5.60
  -1  -1  24    5.10    5.00
   1   1  24    4.60    3.10
   1  -1 -24    3.80    4.30
   1   1  24    9.30    5.20
  -1  -1  24    0.40    5.40
  -2  -1 -24   38.00    7.40
   2  -1  24   55.49    5.30
  -2   1  24   58.29   11.20
  -2   1  24   38.70   11.10
   2  -1  24   45.60    9.10
   2   1  24   54.79    9.60
  -2  -1  24   55.49   11.00
   2   1  24   52.19    5.30
  -2  -1  24   62.99   13.10
   3   1 -24   21.20    7.40
  -3   1  24   12.90    9.20
   3  -1  24   18.10    3.90
  -3   1  24   12.70    7.30
  -3  -1  24   26.00   10.20
   3  -1 -24    7.00    5.70
   4   1 -24   26.50    7.90
  -4   1  24   16.80    9.70
   4  -1  24   41.30    5.90
  -4   1  24   35.80   10.30
   4  -1 -24   34.00    8.30
   4   1  24   30.90    5.40
  -4  -1  24   30.80   11.30
  -4  -1  24   25.80    9.20
   5  -1  24   63.59    7.80
   5   1 -24   78.49   11.40
  -5   1  24   80.59   15.50
  -5   1  24   54.29   13.90
  -5  -1  24   63.79   14.70
  -5  -1  24  102.19   15.40
   5   1  24   66.99    7.70
   5  -1 -24   65.69   11.50
  -6   1  24    7.60    9.50
   6  -1  24   -3.80    3.00
   6   1 -24    0.70    5.00
  -6   1  24   11.60    8.20
   6  -1 -24   -3.40    4.80
  -6  -1  24   -8.70    8.80
  -6  -1  24    7.30    8.30
   6   1  24    0.00    3.60
   0   2  24    9.10    5.10
   0  -2 -24   10.60    5.10
   0  -2  24   14.70    6.20
   0  -2  24    4.80    4.40
  -1  -2 -24   30.40    6.40
   1  -2  24   26.20    4.50
  -1   2  24   31.40    8.90
   1  -2  24   21.20    6.80
  -1   2  24   11.50    7.40
  -1  -2  24   28.90    8.60
   1   2  24   20.40    6.90
   1  -2 -24   23.60    6.60
   1   2  24   16.00    5.00
  -1  -2  24   35.00    8.60
   2  -2  24   28.90    7.30
   2  -2  24   41.70    4.50
  -2   2  24   45.20   10.40
  -2   2  24   22.50    9.70
  -2  -2  24   36.40    8.70
  -2  -2  24   35.50   10.20
   2  -2 -24   38.40    7.80
   2   2  24   33.00    4.60
   2   2  24   39.00    7.90
  -3   2  24  110.29   13.20
  -3   2  24  115.89   19.50
  -3  -2  24  108.29   13.00
  -3  -2  24  129.59   16.60
   3   2  24   86.59    7.60
   4  -2  24   75.59    7.80
  -4   2  24  123.29   15.60
  -4   2  24  122.49   18.40
   4   2 -24  110.79   12.80
  -4  -2  24   67.29   12.90
   4  -2 -24   95.89   11.80
  -4  -2  24   86.59   15.60
   4   2  24   87.29    7.90
  -5   2  24   11.00    9.30
   5   2 -24    4.20    6.20
  -5   2  24    9.70    7.40
   5  -2  24   16.50    4.90
  -5  -2  24    6.00    7.30
   5   2  24   17.10    4.80
   5  -2 -24   13.30    6.70
   6  -2  24  108.69   10.20
   6   2 -24   89.39   12.00
   6   2  24   95.89    9.30
   6  -2 -24   94.99   13.10
  -6  -2  24   91.09   16.10
   0  -3 -24   29.30    6.60
   0  -3  24   26.70    7.00
   0   3  24   26.50    8.10
   0   3  24   21.30    7.00
   0  -3  24   32.00    8.00
   1  -3  24   76.59    6.70
  -1   3  24   64.89   13.90
  -1   3  24   67.99   12.00
   1  -3  24   67.29   10.00
  -1  -3 -24   87.99    9.20
   1  -3 -24   74.09    9.60
  -1  -3  24   67.59   12.20
   1   3  24   73.39   10.00
  -1  -3  24   75.59   10.90
   2  -3  24  185.88   10.80
  -2   3  24  174.18   19.70
  -2   3  24  159.98   16.80
   2  -3  24  152.28   13.90
  -2  -3  24  218.48   17.70
  -2  -3  24  211.68   19.70
   2   3  24  182.88   12.10
   2  -3 -24  191.48   15.30
   3  -3  24   20.30    4.40
  -3   3  24   10.00    8.40
  -3   3  24   18.60    7.80
   3   3  24   21.70    4.50
  -3  -3  24   30.50    8.70
   3  -3 -24   17.00    6.60
  -4   3  24    9.60    7.80
  -4   3  24   22.00   11.30
   4   3  24   26.10    5.10
  -4  -3  24   31.50   10.60
   4  -3 -24   26.70    7.70
   5  -3  24    6.90    4.30
  -5   3  24   -0.50    9.10
   5   3 -24   -2.70    4.30
   5   3  24    2.40    3.50
   5  -3 -24   -3.80    5.20
  -5  -3  24   -1.60    6.50
   6  -3  24   -5.30    3.10
   6   3 -24    3.80    5.70
  -6   3  24   -0.10    9.00
  -6  -3  24   18.80    9.70
   6  -3 -24    0.80    5.20
   6   3  24    0.20    3.60
   0  -4 -24    6.80    4.50
   0   4  24   13.70    6.90
   0  -4  24   16.80    6.30
   0   4  24    4.30    5.40
   0  -4  24   17.70    5.70
   1  -4  24  108.09    8.00
  -1  -4 -24  134.19   11.60
  -1   4  24  103.59   13.00
   1  -4  24  106.09   11.60
  -1   4  24   96.29   14.80
  -1  -4  24  124.79   13.50
   1  -4 -24  113.19   11.30
   1   4  24  106.89   12.30
   1   4  24  105.89   11.90
  -2   4  24   33.20    9.00
   2  -4  24   24.50    6.70
  -2   4  24   35.70   11.40
   2  -4  24   35.90    4.50
   2  -4 -24   32.00    7.80
  -2  -4  24   39.20    9.40
   2   4  24   25.90    5.90
  -3   4  24   31.10   12.20
   3  -4  24   46.30    8.60
  -3  -4  24   31.30    8.90
   3   4  24   40.20    5.20
   3  -4 -24   43.90    8.80
  -4   4  24   17.60   11.50
   4  -4  24   19.90    4.80
   4   4  24   16.40    4.20
   4  -4 -24   11.40    6.80
  -4  -4  24   21.70    8.70
   5  -4  24   89.29    8.80
  -5   4  24   93.59   20.20
   5  -4 -24   58.39   11.40
  -5  -4  24   68.39   13.60
   5   4  24   80.99    7.90
   0   5  24   35.00   10.40
   0  -5  24   34.60    8.50
   0  -5 -24   24.50    6.70
  -1  -5 -24   41.10    7.80
   1  -5  24   43.30    6.00
   1  -5  24   47.70    9.40
  -1   5  24   42.10   12.20
   1  -5 -24   42.50    8.00
   1   5  24   34.20    8.90
  -1  -5  24   27.30    7.90
   2  -5  24   23.30    4.10
   2  -5  24   13.40    5.90
  -2   5  24   25.50   10.20
   2   5  24   12.00    5.70
   2  -5 -24   23.20    7.20
  -2  -5  24   15.30    7.30
   3  -5  24   42.90    5.50
  -3   5  24   18.20   10.20
   3  -5  24   40.10    8.60
  -3  -5  24   43.80   10.90
   3   5  24   42.20    6.20
   3  -5 -24   47.90    9.30
   4  -5  24    2.40    3.10
  -4   5  24   -1.40    8.20
  -4  -5  24   -5.30    5.30
   4  -5 -24    5.90    6.00
   4   5  24    4.00    3.20
  -5   5  24   68.19   17.70
   5  -5  24   76.79    8.30
  -5  -5  24   57.09   12.80
   5   5  24   67.59    7.30
   5  -5 -24   72.89   12.70
   0  -6  24   14.80    6.80
   0   6  24   -3.40    5.70
   0  -6 -24    6.60    4.70
  -1  -6 -24   59.49   10.70
   1  -6  24   76.09   10.40
  -1   6  24   79.29   15.60
   1  -6 -24   78.09   10.10
   1   6  24   59.19   12.80
  -1  -6  24   46.00    9.60
   2  -6  24    5.90    5.00
  -2   6  24   20.50    9.90
   2   6  24    5.40    5.40
   2  -6 -24    4.40    5.00
  -2  -6  24   12.40    6.70
   3  -6  24   51.59    9.00
  -3   6  24   32.40   12.30
   3  -6 -24   41.20    9.10
   3   6  24   51.39    7.20
  -3  -6  24   31.30    9.30
   4  -6  24   39.20    5.80
  -4   6  24   37.00   12.20
   4  -6 -24   39.20    9.80
   4   6  24   38.30    5.90
  -4  -6  24   36.40   10.00
  -5   6  24  131.09   23.70
   5  -6  24  108.59    9.90
   5  -6 -24  122.39   14.50
   5   6  24  106.29    9.00
  -5  -6  24  104.49   15.50
   0   7  24   56.89   13.70
   0  -7  24   75.69   10.10
   0  -7 -24   65.29    9.40
  -1   7  24   -1.50    7.80
   1  -7  24    8.20    5.50
   1   7  24    4.60    7.10
   1  -7 -24   -2.30    4.70
  -1  -7  24   -2.90    4.50
   2  -7  24  124.89   13.10
  -2   7  24  131.49   17.90
   2   7  24  112.49   14.50
   2  -7 -24  116.29   12.70
  -2  -7  24  155.08   15.40
  -3   7  24   26.20   12.20
   3  -7  24   53.59    9.50
  -3  -7  24   68.59   12.90
   3  -7 -24   44.20    9.00
  -4   7  24   14.40   10.50
   4   7  24    0.30    3.70
   4  -7 -24    4.80    6.50
  -4  -7  24    0.00    6.00
   0   8  24   12.60    8.90
   0  -8  24    7.10    5.90
   1  -8  24   51.59   10.50
  -1   8  24   55.89   13.70
  -1  -8  24   44.10    9.50
   1  -8 -24   68.29    9.80
   1   8  24   43.80   12.10
  -2   8  24   97.19   18.70
   2  -8  24   93.99   11.70
   2   8  24   93.09   13.90
  -2  -8  24   84.69   12.80
   2  -8 -24  109.59   12.40
   3  -8  24   41.60    9.30
  -3   8  24   31.60   12.50
  -3  -8  24   20.40    8.30
   3   8  24   31.00    9.60
   0  -9  24  241.28   19.40
   0   9  24  225.28   23.10
   0  -9 -24  242.88   17.70
  -1   9  24   37.40   12.80
   1  -9  24   71.99   11.80
   1   9  24   54.09   12.80
   1  -9 -24   66.49   10.10
  -1  -9  24   53.59   11.50
  -2   9  24   67.79   15.70
   2  -9  24   51.79   10.30
   2  -9 -24   72.19   11.50
  -2  -9  24   46.00   10.90
   2   9  24   39.30   11.30
   0  10  24    4.20    7.60
   0   0  25    1.70    4.60
   0   0  25    4.30    5.20
  -1   0  25    2.30    5.60
   1   0  25    0.60    4.30
  -1   0  25   -3.90    4.10
   1   0  25    2.30    3.10
   2   0  25    2.20    3.90
   2   0 -25   -4.20    4.40
   2   0  25    2.40    2.10
  -2   0  25   11.30    7.90
  -2   0  25   -2.80    5.10
   3   0  25  103.69    8.10
  -3   0  25   69.19   13.20
   3   0 -25  100.99   12.10
  -4   0  25   71.49   13.50
   4   0 -25   65.29   11.60
  -4   0  25   41.90   13.70
   4   0  25   50.59    6.70
  -5   0  25   23.70   11.90
   5   0 -25    9.00    5.70
  -5   0  25    1.60    8.10
   5   0  25   15.60    4.40
  -6   0  25   18.20   10.10
   0  -1 -25  126.19   11.70
   0   1  25  125.69   13.40
   0  -1  25  105.79   12.20
   0  -1  25  109.29   12.30
   1  -1  25  144.99   10.50
  -1   1  25  138.29   14.60
   1  -1  25  102.99   11.90
  -1  -1 -25  122.49   11.30
  -1   1  25  123.59   15.70
   1   1  25  125.69   10.90
  -1  -1  25  113.89   14.80
   1   1  25  164.18   14.40
   1  -1 -25  125.99   12.40
  -2   1  25   82.79   12.40
   2  -1  25   48.20    8.80
   2  -1  25   59.29    6.00
  -2  -1 -25   53.49   11.40
  -2   1  25   75.49   14.50
  -2  -1  25   45.10   11.60
   2  -1 -25   44.60    9.10
  -2  -1  25   53.19   11.10
   2   1  25   57.09    6.20
   2   1  25   58.69   10.60
  -3   1  25   51.39   11.70
   3   1 -25   71.59    9.70
   3  -1  25   64.69    6.60
  -3  -1  25   58.79   13.40
  -3  -1  25   69.69   12.60
   3  -1 -25   57.89   10.50
   3   1  25   59.29    6.40
  -4   1  25   30.30   12.00
   4  -1  25   42.20    6.10
  -4   1  25   54.99   13.20
   4   1 -25   50.59   10.40
   4   1  25   48.40    6.20
  -4  -1  25   30.60    9.10
   4  -1 -25   51.39   10.00
  -4  -1  25   29.50   11.10
   5   1 -25   42.90   10.00
  -5   1  25   41.70   13.70
   5  -1  25   35.40    6.40
  -5  -1  25   44.80   13.40
   5  -1 -25   29.30    8.80
   5   1  25   48.30    7.50
  -5  -1  25   53.29   12.90
   6  -1  25   32.90    6.60
   6   1  25   37.90    6.70
   0   2  25   11.50    5.90
   0  -2 -25   17.80    5.90
   0  -2  25   10.80    6.00
   0   2  25   13.40    7.00
   0  -2  25   10.10    5.70
  -1   2  25   81.79   15.00
   1  -2  25   95.79   11.50
  -1   2  25   70.89   12.60
   1  -2  25   92.29    8.20
  -1  -2 -25  119.69   10.90
  -1  -2  25   93.29   12.30
   1   2  25   91.99   10.40
   1   2  25   83.29   11.10
   1  -2 -25   99.09   10.80
  -1  -2  25  108.39   14.10
   2  -2  25   12.50    3.50
  -2   2  25   14.40    8.00
  -2   2  25   14.50    8.40
   2  -2  25   13.00    5.70
   2   2  25   15.10    4.10
  -2  -2  25   20.30    8.10
   2  -2 -25    4.40    5.20
  -2  -2  25   15.20    7.40
  -3   2  25   46.80   10.80
   3  -2  25   63.69    6.60
  -3   2  25   66.39   14.60
   3  -2 -25   72.69   10.50
   3   2  25   57.39    6.30
  -3  -2  25   42.50   11.90
  -3  -2  25   62.99   12.00
   4   2 -25   13.40    6.80
  -4   2  25   24.40   10.20
  -4   2  25   34.40   10.50
   4  -2  25   18.00    4.70
  -4  -2  25    5.30    7.10
  -4  -2  25   32.20   10.70
   4  -2 -25   11.50    5.80
   4   2  25   15.30    4.20
  -5   2  25   55.49   15.00
  -5   2  25   34.50   11.20
   5  -2  25   52.49    7.20
   5   2 -25   85.39   13.50
   5   2  25   56.99    7.20
   5  -2 -25   48.60   10.30
  -5  -2  25   61.39   13.20
   0  -3  25   96.49   12.00
   0   3  25  116.29   13.10
   0   3  25   86.89   13.30
   0  -3  25  100.09   11.40
   0  -3 -25  108.29   11.00
  -1   3  25   44.60   10.00
  -1   3  25   37.60   11.10
  -1  -3 -25   35.90    7.00
   1  -3  25   28.50    7.60
  -1  -3  25   27.90    9.00
   1   3  25   49.99    9.70
   1  -3 -25   41.70    8.50
   1   3  25   34.80    8.20
  -1  -3  25   38.90    9.30
   2  -3  25   51.79    9.50
  -2   3  25   56.19   12.80
   2  -3  25   41.50    5.10
  -2   3  25   34.70   10.10
  -2  -3  25   40.10   10.90
   2  -3 -25   55.39    9.40
   2   3  25   62.59    7.50
  -2  -3  25   44.40   10.00
   3  -3  25   93.89    7.80
  -3   3  25   93.99   18.10
   3  -3  25   86.69   10.60
  -3   3  25   63.69   13.20
   3  -3 -25  103.09   12.00
  -3  -3  25   76.29   13.50
  -4   3  25    0.60    7.50
  -4   3  25    1.30    7.00
   4  -3  25   -0.60    3.00
   4   3  25    3.10    3.10
  -4  -3  25   15.40    8.10
   4  -3 -25    7.10    5.80
   5  -3  25    6.60    4.20
   5   3 -25   -0.70    5.20
  -5   3  25    6.10   10.40
   5   3  25    5.30    3.30
   5  -3 -25    2.80    5.10
  -5  -3  25    9.80    8.00
   0  -4  25  434.76   26.90
   0   4  25  471.05   27.60
   0  -4 -25  470.65   24.90
   0   4  25  397.66   29.30
  -1  -4 -25   46.40    7.90
  -1   4  25   42.60    9.90
   1  -4  25   44.00    5.70
  -1   4  25   24.30   10.00
   1  -4  25   41.60    8.70
   1   4  25   37.70    9.10
  -1  -4  25   34.90    9.20
   1   4  25   47.10    9.40
  -2   4  25   39.50   11.90
   2  -4  25   19.00    6.40
  -2   4  25   21.10    8.10
   2   4  25   17.50    5.60
   2  -4 -25   24.90    6.90
   3  -4  25    0.50    4.50
  -3   4  25   10.10    8.30
   3  -4  25   12.90    3.80
   3  -4 -25   16.60    7.00
   3   4  25    5.40    3.40
  -3  -4  25   10.00    7.10
  -4   4  25   50.49   15.60
   4  -4  25   53.99    7.00
  -4  -4  25   41.70   11.00
   4   4  25   41.30    5.40
   4  -4 -25   33.80    8.80
  -5   4  25   16.40   11.60
   5  -4  25   31.00    6.30
  -5  -4  25   23.60    8.80
   5   4  25   30.70    5.80
   5  -4 -25   17.60    7.50
   0  -5 -25  123.99   12.10
   0  -5  25  169.98   14.90
   0   5  25  138.89   17.20
  -1   5  25   56.29   13.80
   1  -5  25   86.49   11.20
  -1  -5 -25   89.49    9.90
   1  -5 -25   74.79    9.90
  -1  -5  25   72.99   10.60
   1   5  25   82.79   12.50
  -2   5  25   68.19   14.60
   2  -5  25   73.79    6.50
   2  -5 -25   75.49    9.70
   2   5  25   48.40    9.20
  -2  -5  25   96.89   12.90
   3  -5  25  109.89   12.40
  -3   5  25   92.49   18.50
  -3  -5  25   78.29   13.70
   3  -5 -25  119.69   13.10
  -4   5  25  -10.90    7.10
   4  -5  25    0.10    3.30
  -4  -5  25   -7.30    5.30
   4  -5 -25   -2.50    5.80
   4   5  25   -5.40    2.50
   5  -5  25   15.20    4.90
  -5   5  25   -0.20   10.00
   5   5  25   17.60    4.80
  -5  -5  25    5.00    7.90
   5  -5 -25   12.90    7.90
   0  -6 -25   35.60    8.20
   0  -6  25   26.00    8.10
   0   6  25   27.70   10.70
   1  -6  25   95.19   12.00
  -1   6  25   84.19   16.00
   1  -6 -25  127.69   12.50
  -1  -6  25  106.09   12.90
   1   6  25   83.09   14.80
   2  -6  25    6.10    5.70
  -2   6  25   23.80   10.10
  -2  -6  25    5.40    7.30
   2   6  25    8.60    5.80
   3  -6  25   20.10    7.40
  -3   6  25   34.20   12.30
   3  -6 -25   37.90    8.90
  -3  -6  25   37.20    9.90
   3   6  25   28.70    6.90
  -4   6  25   19.60   13.10
   4   6  25   15.30    4.60
  -4  -6  25   40.70   10.50
   4  -6 -25   34.40    9.20
   0  -7 -25   11.60    5.70
   0   7  25    9.10    6.60
   0  -7  25    2.10    5.30
   1  -7  25  124.79   13.70
  -1   7  25  123.09   18.00
   1   7  25  140.39   17.80
  -1  -7  25  153.18   15.60
   1  -7 -25  129.19   12.80
  -2   7  25   56.19   13.90
   2  -7  25   59.29   11.10
   2   7  25   31.50    9.50
   2  -7 -25   51.39    9.60
   3  -7  25   14.40    6.10
  -3   7  25   31.60   12.00
  -3  -7  25    5.90    7.20
   3   7  25   19.50    7.50
   3  -7 -25   21.40    7.70
  -4   7  25   -3.00    9.50
  -4  -7  25   13.30    7.40
   4  -7 -25   18.80    7.50
   4   7  25   16.80    6.00
   0  -8 -25  148.89   13.90
   0   8  25  162.48   19.30
   0  -8  25  123.49   14.40
   1  -8  25   87.79   11.70
  -1   8  25   80.09   16.70
   1   8  25   83.79   15.90
   1  -8 -25   82.69   11.80
  -2   8  25   -3.80    7.70
   2  -8  25    1.60    5.40
  -2  -8  25   16.00    7.20
   2  -8 -25   -5.60    4.30
  -3   8  25   54.49   16.00
   3  -8  25   32.00    8.40
  -3  -8  25   19.80    9.20
   3  -8 -25   43.40    9.60
   3   8  25   25.20    9.00
   0   9  25   58.39   13.80
   0  -9  25   57.29   11.20
  -1   9  25   -6.60    6.30
   1  -9  25    7.50    5.70
   1  -9 -25    9.30    6.90
   1   9  25   -2.40    6.70
  -1  -9  25    7.40    6.70
   0   0  26   16.70    6.70
  -1   0  26   10.10    6.40
   1   0  26   12.10    4.50
  -1   0  26    4.40    6.80
   1   0  26   12.50    6.10
   1   0 -26    5.30    5.10
   2   0  26   87.09    7.50
   2   0 -26   69.99   10.40
   2   0  26   56.69   10.60
  -2   0  26   65.99   13.70
   3   0  26    3.60    2.90
  -3   0  26   14.50    7.30
  -3   0  26    5.00    8.20
   3   0 -26    3.40    4.30
  -4   0  26  179.88   22.80
   4   0 -26  190.88   17.10
   4   0  26  190.08   12.60
  -4   0  26  225.18   21.20
  -5   0  26   13.40    9.50
  -5   0  26    7.30    9.40
   5   0 -26   14.60    7.50
   5   0  26   18.60    5.40
   0  -1  26  234.38   18.30
   0   1  26  231.68   19.20
   0  -1  26  209.28   17.80
   1  -1  26   28.60    7.20
   1  -1  26   16.80    5.10
  -1   1  26   17.10    7.60
  -1   1  26   13.80    7.70
  -1  -1 -26   21.80    6.00
  -1  -1  26    4.50    5.80
   1   1  26   15.60    6.00
  -1  -1  26   20.10    8.00
   1   1  26   10.90    6.30
   1  -1 -26   19.20    6.60
  -2   1  26   48.70   10.80
   2  -1  26   47.10    5.70
  -2   1  26   47.70   12.90
   2  -1  26   49.20    9.20
  -2  -1  26   46.40   12.00
   2   1  26   35.90    8.90
  -2  -1  26   68.19   12.50
   2   1  26   42.20    5.40
   3  -1  26   84.19    7.50
  -3   1  26   50.69   12.40
   3   1 -26   95.69   11.90
  -3   1  26   69.49   15.50
  -3  -1  26   82.39   14.60
   3  -1 -26   92.99   11.60
  -3  -1  26   63.99   14.60
   3   1  26   75.29    7.30
  -4   1  26   43.30   13.90
   4  -1  26   36.20    5.30
  -4   1  26   23.50    9.80
   4   1 -26   34.50    9.50
   4   1  26   36.20    5.90
  -4  -1  26   42.00   12.00
   4  -1 -26   46.30   10.20
  -4  -1  26   43.90   13.30
  -5   1  26  103.39   17.40
   5  -1  26   98.59    9.50
  -5   1  26   68.29   16.40
   5   1 -26   92.59   12.80
  -5  -1  26  100.29   17.20
   5  -1 -26   93.29   12.70
  -5  -1  26   86.59   18.10
   5   1  26  110.49    9.50
   0   2  26    8.80    6.00
   0  -2  26    8.20    5.40
   0  -2 -26    0.60    4.00
   0   2  26    8.40    6.60
  -1   2  26   48.80   12.80
   1  -2  26   13.90    6.60
  -1   2  26   35.20    9.90
   1  -2  26   23.50    5.20
  -1  -2 -26   16.50    6.00
   1   2  26   14.50    5.40
   1   2  26   30.80    8.50
   1  -2 -26   19.50    6.80
  -1  -2  26   24.20    9.00
  -1  -2  26   28.10    8.30
  -2   2  26   22.80    9.90
   2  -2  26   21.20    7.00
  -2   2  26   13.50    7.90
   2  -2  26   14.20    3.60
   2   2  26   10.40    3.90
  -2  -2  26   16.20    8.10
  -2  -2  26   19.40    8.30
   2  -2 -26   17.20    6.50
  -3   2  26  -12.80    5.80
   3  -2  26   -0.20    2.50
  -3   2  26    6.80    7.40
  -3  -2  26   -2.00    6.00
   3  -2 -26    5.90    5.80
   3   2  26    1.60    2.80
  -3  -2  26   10.50    8.50
  -4   2  26    0.50    7.10
  -4   2  26   -7.70    4.40
   4   2 -26   -2.30    4.90
   4  -2  26   -0.30    2.70
  -4  -2  26   -0.60    5.30
   4   2  26    2.40    3.20
   4  -2 -26    3.60    5.00
  -4  -2  26   -2.20    8.30
  -5   2  26  104.49   15.80
   5  -2  26  123.09   10.30
  -5   2  26   82.29   18.50
   5   2 -26  125.29   14.30
  -5  -2  26  104.09   15.60
   5   2  26  106.49    9.40
   5  -2 -26   96.19   13.20
   0   3  26   -0.30    5.10
   0  -3  26    7.30    5.30
   0  -3 -26    7.80    4.60
   0   3  26    8.40    5.50
   0  -3  26    4.40    5.80
  -1   3  26   85.39   12.70
  -1  -3 -26   77.29    9.60
  -1   3  26  110.89   15.70
   1  -3  26   76.39   10.90
   1  -3  26   95.29    8.60
  -1  -3  26   79.89   13.60
   1  -3 -26   76.69   10.40
   1   3  26   72.09   10.90
  -1  -3  26   86.99   12.30
   1   3  26   74.69   11.30
  -2   3  26   12.70    7.80
   2  -3  26    3.60    5.10
   2  -3  26    4.00    2.60
  -2   3  26    2.30    6.50
   2   3  26    3.70    3.50
  -2  -3  26   -2.30    5.10
   2  -3 -26   -1.50    4.40
  -2  -3  26   -0.50    6.00
  -3   3  26  134.89   19.80
   3  -3  26  142.39   10.10
   3   3  26  152.98   10.80
  -3  -3  26  148.39   16.90
   3  -3 -26  171.88   15.40
  -4   3  26   12.40   10.40
   4  -3  26   20.20    5.00
  -4   3  26   36.50   11.10
  -4  -3  26    6.40    7.90
   4  -3 -26   22.20    8.00
   4   3  26   18.00    4.20
  -5   3  26   96.19   19.70
   5   3 -26  122.29   14.30
   5  -3  26   83.89    8.90
   5   3  26   99.79    8.90
  -5  -3  26   94.09   16.40
   5  -3 -26   93.69   13.00
   0  -4  26   11.50    6.60
   0   4  26   18.90    6.30
   0   4  26    7.80    7.30
   0  -4 -26   20.40    6.20
   0  -4  26    7.40    5.50
   1  -4  26   12.80    6.70
   1  -4  26   17.40    4.50
  -1  -4 -26   11.90    5.50
  -1   4  26   19.80    9.40
   1   4  26    3.10    5.00
   1  -4 -26    4.30    4.60
   1   4  26   29.40    9.10
   2  -4  26   51.99    9.70
  -2   4  26   48.40   13.20
   2  -4  26   47.80    5.50
  -2   4  26   36.70   10.10
   2  -4 -26   43.20    9.30
   2   4  26   41.20    7.80
  -2  -4  26   71.19   12.80
   3  -4  26    2.00    2.40
  -3   4  26   -6.20    4.50
   3  -4  26    3.30    5.20
  -3  -4  26   13.20    7.10
   3   4  26    8.30    3.70
   3  -4 -26   -3.50    3.40
   4  -4  26   19.10    4.90
  -4   4  26   19.80   11.30
  -4  -4  26    4.30    8.00
   4   4  26   17.50    4.50
   4  -4 -26   29.40    8.80
   5   4 -26   52.89   11.40
   5  -4  26   33.90    6.70
  -5   4  26   26.10   12.80
   5  -4 -26   62.39   11.90
   5   4  26   54.99    6.30
  -5  -4  26   35.10   11.40
   0  -5  26   23.70    7.30
   0  -5 -26   21.70    7.00
   0   5  26   20.30    8.60
  -1  -5 -26   46.30   10.70
  -1   5  26   62.29   14.30
   1  -5  26   42.90    9.00
   1   5  26   47.20   11.40
  -1  -5  26   54.19   11.10
   2  -5  26   99.99   12.10
   2  -5  26   71.69    6.60
   2   5  26   58.39   11.00
   2  -5 -26   89.59   11.50
  -3   5  26   42.60   13.90
   3  -5  26   83.59   11.00
  -3  -5  26   70.79   13.10
   3   5  26   76.79    9.20
   3  -5 -26   65.09   11.30
   4  -5  26   22.40    5.00
  -4   5  26   39.30   13.50
  -4  -5  26    5.80    7.20
   4   5  26   23.20    5.40
   4  -5 -26   23.20    8.80
   0  -6 -26   29.50    7.80
   0  -6  26   32.50    8.80
   0   6  26   22.90   10.30
  -1   6  26  167.98   20.40
   1  -6  26  140.99   14.90
  -1  -6  26  157.08   15.80
   1   6  26  141.59   17.40
   1  -6 -26  181.58   15.20
   2  -6  26  192.98   16.40
  -2   6  26  159.28   19.60
   2  -6 -26  170.48   15.40
  -2  -6  26  169.18   17.50
   2   6  26  148.99   16.50
   3  -6  26   10.20    6.90
  -3   6  26   14.40    9.50
   3   6  26   11.20    5.70
  -3  -6  26   16.50    8.70
   3  -6 -26   35.10    9.10
  -4   6  26   15.70   10.50
   4  -6 -26    4.50    6.40
   4   6  26    7.50    4.70
  -4  -6  26   11.80    7.80
   0  -7  26   -5.20    4.90
   0   7  26   11.30    8.50
   0  -7 -26    5.10    5.20
  -1   7  26   28.20   11.60
   1  -7  26   33.40    9.10
   1  -7 -26   34.70    8.00
   1   7  26   33.60   10.50
  -1  -7  26   24.90    8.60
   2  -7  26   53.49   10.20
  -2   7  26   75.09   16.50
   2   7  26   51.49   12.00
   2  -7 -26   76.59   10.90
  -2  -7  26   59.89   12.30
  -3   7  26   98.79   19.30
   3  -7  26   81.29   11.40
   3   7  26   62.69   11.50
   3  -7 -26   95.29   12.60
  -3  -7  26   67.49   13.30
   0   8  26   71.49   15.70
   0  -8 -26   95.89   11.70
   0  -8  26   67.39   12.40
   1  -8  26    7.10    6.20
  -1   8  26    5.10    7.60
   1  -8 -26   16.50    6.60
   1   8  26   -3.00    6.70
  -1  -8  26   -5.50    5.40
  -2   8  26   16.70   11.00
   2  -8  26   18.90    7.70
   2   8  26   17.80    9.00
  -2  -8  26   14.50    7.30
   2  -8 -26   25.10    8.20
   0   0  27    5.80    5.40
   0   0  27   -2.80    4.80
   1   0  27    5.00    4.30
  -1   0  27    5.10    6.50
  -1   0  27   -0.70    6.10
   1   0  27    1.50    5.40
   1   0 -27   -3.30    4.70
   2   0 -27   22.90    7.70
  -2   0  27   14.10    8.30
  -2   0  27   16.40    9.00
   2   0  27   20.60    4.40
   2   0  27   29.20    7.10
  -3   0  27    0.80    6.80
   3   0  27    3.70    3.00
  -3   0  27    9.60    8.20
   3   0 -27    4.50    6.00
  -4   0  27   55.39   13.30
   4   0 -27   41.00    9.40
   4   0  27   67.59    7.20
  -4   0  27   31.60   13.10
  -5   0  27   17.70   10.20
   5   0  27   11.20    4.60
  -5   0  27   12.00    9.80
   5   0 -27   12.40    7.30
   0  -1 -27  410.86   24.10
   0   1  27  461.85   27.80
   0  -1  27  360.66   26.00
   0  -1  27  464.75   28.00
   0   1  27  387.36   27.60
   1  -1  27   43.40    8.00
  -1   1  27   66.59   13.70
  -1  -1 -27   63.09    8.90
  -1   1  27   60.79   12.00
  -1  -1  27   46.80   11.80
   1   1  27   51.49   10.20
  -1  -1  27   63.59   11.90
   1  -1 -27   61.79   10.20
   1   1  27   47.50    9.30
   2  -1  27  297.87   16.20
  -2   1  27  315.27   24.00
  -2   1  27  274.27   25.60
  -2  -1  27  300.17   23.20
   2   1  27  294.27   17.20
   2  -1 -27  335.67   21.90
  -2  -1  27  323.17   26.30
  -3   1  27   -4.00    7.60
  -3   1  27    5.40    7.20
   3   1 -27   10.30    6.80
   3  -1  27   11.00    3.60
  -3  -1  27   10.10    9.40
   3   1  27    7.60    2.90
  -3  -1  27   17.10    8.60
   3  -1 -27   14.20    7.10
  -4   1  27   23.80   11.60
   4  -1  27   31.40    5.80
  -4   1  27   32.80   11.50
   4   1 -27   46.70   10.80
  -4  -1  27   19.80   10.60
   4  -1 -27   22.30    8.40
   4   1  27   40.50    5.90
  -4  -1  27   23.80   10.30
   5  -1  27    2.20    3.80
   5   1 -27    7.30    6.10
  -5   1  27    4.50    9.80
  -5   1  27   20.60    9.90
   5  -1 -27    6.70    6.50
  -5  -1  27   10.50    9.70
  -5  -1  27   12.90   10.60
   5   1  27    6.90    3.80
   0  -2 -27  138.19   12.60
   0  -2  27  138.79   14.40
   0   2  27   98.29   14.40
   0  -2  27  115.19   13.70
   0   2  27  108.69   14.00
  -1  -2 -27   82.29   10.40
  -1   2  27   79.19   14.50
  -1   2  27   84.39   12.60
   1  -2  27   70.49    8.80
   1  -2  27   62.89   11.20
  -1  -2  27   81.09   14.30
  -1  -2  27   83.79   12.10
   1   2  27   70.89   10.00
   1   2  27   70.19   12.10
   1  -2 -27   93.29   10.80
   2  -2  27   27.80    7.20
  -2   2  27   18.00    8.70
   2  -2  27   21.70    4.50
  -2   2  27   25.30   10.80
  -2  -2  27   33.50   10.80
  -2  -2  27   35.50    9.90
   2   2  27   32.30    6.10
   2  -2 -27   27.80    7.70
  -3   2  27  267.57   23.00
   3  -2  27  236.28   14.00
  -3   2  27  269.87   26.50
   3   2  27  233.68   14.40
   3  -2 -27  268.47   20.20
  -3  -2  27  270.27   22.60
  -3  -2  27  253.97   23.80
   4   2 -27   23.00    8.50
  -4   2  27   30.90   10.80
   4  -2  27   21.70    5.00
  -4   2  27   10.00    8.20
  -4  -2  27   16.90    9.80
   4  -2 -27   34.30    9.00
   4   2  27   17.00    4.30
  -5   2  27   25.30   10.70
   5  -2  27   29.80    6.40
  -5   2  27   71.79   17.50
   5  -2 -27   27.20    9.10
  -5  -2  27   36.00   11.60
   5   2  27   40.30    5.70
   0  -3  27   40.30    9.30
   0   3  27   31.60   10.10
   0  -3 -27   29.50    7.50
   0   3  27   15.60    7.20
   0  -3  27   34.90    9.10
  -1   3  27   14.50    8.20
   1  -3  27   14.90    4.80
  -1   3  27   27.60    9.20
   1  -3  27   18.00    7.60
  -1  -3  27   28.30    8.50
   1   3  27   17.50    7.90
  -1  -3  27   23.30    9.10
   1  -3 -27   28.80    7.70
   1   3  27   23.60    8.10
   2  -3  27   29.40    5.20
   2  -3  27   24.10    8.10
  -2   3  27   30.40   10.20
  -2   3  27   40.20   12.40
   2  -3 -27   43.10    9.00
   2   3  27   31.00    7.00
  -2  -3  27   38.70   10.00
  -3   3  27   -5.90    6.00
  -3   3  27   15.90    9.50
   3  -3  27    6.80    3.00
   3  -3 -27   13.10    6.60
   3   3  27    1.70    3.10
   4  -3  27   10.50    4.00
  -4   3  27    4.90    8.00
  -4   3  27    1.40    9.60
   4  -3 -27   11.50    7.50
  -4  -3  27   11.40    8.70
   0  -4  27   -5.40    4.70
   0  -4 -27    4.00    4.90
   0   4  27   -2.70    4.70
   1  -4  27   34.40    9.70
  -1   4  27   39.50   10.20
  -1  -4 -27   41.40    8.10
   1  -4  27   39.10    7.20
  -1  -4  27   40.70   10.10
   1   4  27   56.29   10.90
   1  -4 -27   63.59   10.30
  -2   4  27    0.40    5.90
  -2   4  27   -2.30    5.00
   2  -4  27    7.20    3.10
   2  -4  27    3.70    6.00
   2  -4 -27   -0.20    5.20
   2   4  27   -2.80    4.10
  -2  -4  27   10.00    7.40
  -3   4  27   18.90   11.50
   3  -4  27   16.60    4.20
   3  -4 -27    5.80    6.10
  -3  -4  27   13.10    7.70
   3   4  27   23.20    5.80
   4  -4  27   33.60    5.80
   4   4  27   36.70    6.40
   4  -4 -27   22.20    8.60
  -4  -4  27   42.00   12.50
   0   5  27   35.60   11.70
   0  -5  27   53.79   11.10
   0  -5 -27   34.30    8.10
  -1   5  27   83.29   16.40
   1  -5  27   66.39   11.40
  -1  -5  27   72.69   12.80
   1  -5 -27   79.39   10.80
   1   5  27   70.89   13.60
   2  -5  27   37.60    8.40
  -2   5  27   45.00   13.70
   2  -5 -27   35.30    8.90
  -2  -5  27   27.40    9.50
   2   5  27   27.80    8.70
  -3   5  27   33.30   12.30
   3  -5  27   11.20    5.80
   3  -5  27   11.80    4.00
   3  -5 -27    7.80    6.30
  -3  -5  27   18.90    8.70
   4  -5  27   37.80    6.10
  -4   5  27   47.60   14.70
   4   5  27   32.80    6.60
  -4  -5  27   36.50   11.40
   4  -5 -27   36.70    9.90
   0  -6 -27    9.80    5.60
   0   6  27   10.30    8.40
   0  -6  27   23.10    7.70
  -1   6  27   42.60   13.30
   1  -6  27   63.89   11.50
   1  -6 -27   39.90    8.80
  -1  -6  27   50.19   11.70
   1   6  27   48.60   12.70
  -2   6  27   10.90   10.40
   2  -6  27   32.70    8.70
   2  -6 -27   28.10    8.10
   2   6  27   23.10    9.00
  -2  -6  27   25.80    9.30
   3  -6  27   19.10    7.70
  -3   6  27   16.10    9.20
  -3  -6  27   21.90    9.40
[truncated: 17,380 more chars]
